# Supplementary material
Source: PubMed Central journal article supplement (PMC5359917)

## Supporting Information

### Total synthesis of a key series of vinblastines modified at C4 that define the importance and surprising trends in activity

Shouliang Yang, Kuppusamy Sankar, Colin K. Skepper, Timothy J. Barker, John C. Lukesh III, Daniel M. Brody, Manuela Brutsch, and Dale L. Boger\*

*Department of Chemistry and the Skaggs Institute for Chemical Biology, The Scripps Research Institute, 10550 North Torrey Pines Road, La Jolla, California 92037, United States*

#### Table of Contents

|                   |          |
|-------------------|----------|
| General methods   | S1       |
| Experimental Data | S2-S44   |
| References        | S45      |
| NMR Spectra       | S45-S100 |

**General Methods.** All commercial reagents were used without further purification unless otherwise noted. All reactions were performed in oven-dried (200 °C) glassware and under an inert atmosphere of anhydrous Ar unless otherwise noted. 1,3,5-Triisopropylbenzene (Oakwood) was distilled from CaH<sub>2</sub> and stored with neutral alumina for at least 72 h prior to use. Column chromatography was performed with silica gel 60. TLC was performed on EMD Millipore silica gel (250 μm) F254 glass plates and spots visualized by UV. PTLC was performed on EMD Millipore silica gel (250 and 500 μm) F254 glass plates. Optical rotations were determined on a Rudolph Research Analytical Autopol III automatic polarimeter using the sodium D line (λ = 589 nm) at room temperature. <sup>1</sup>H and <sup>13</sup>C NMR was recorded on a Bruker 500 MHz and 600 MHz spectrometers. Chemical shifts are reported in ppm from an internal standard of residual CHCl<sub>3</sub> (δ 7.26 for 1H). Proton chemical data are reported as follows: chemical shift (δ), multiplicity (ovlp = overlapping, br = broad, s = singlet, d = doublet, t = triplet, q = quartet, m = multiplet), coupling constant, and integration. High resolution mass spectra were obtained on an Agilent ESI-TOF/MS using Agilent ESI-L low concentration tuning mix as internal high resolution calibration standards. The purity of each tested compound (>95%) was determined on an Agilent 1100 LC/MS

instrument using a ZORBAX SB-C8 column (3.5 mm, 4.6 mm × 50 mm, with a flow rate of 0.75 mL/min and detection at 220 and 254 nm) with a 10–98% acetonitrile/water/0.1% formic acid gradient.

## Experimental Data.

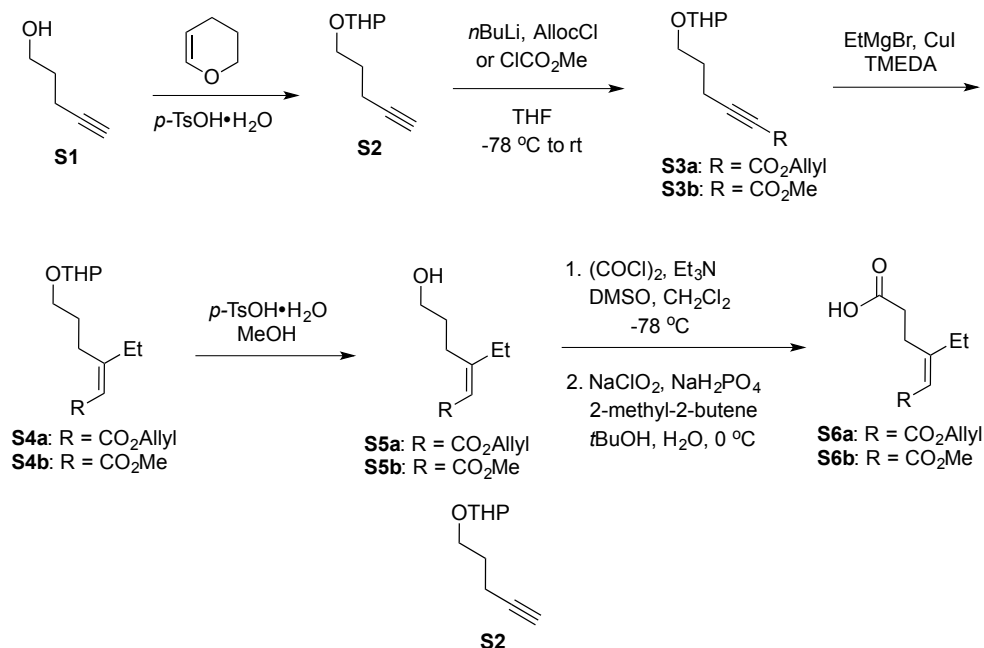

**Compound S2.** *p*-TsOH (565 mg, 2.97 mmol) was added to a stirred mixture of pent-4-yn-1-ol (5 g, 59.4 mmol) in CH<sub>2</sub>Cl<sub>2</sub> (74.3 mL) at room temperature. After 1 h the mixture was poured into saturated aqueous NaHCO<sub>3</sub> (200 mL). The layers were separated and the aqueous layer was extracted with CH<sub>2</sub>Cl<sub>2</sub> (50 mL). The combined organic extracts were washed with saturated aqueous NaCl, dried (Na<sub>2</sub>SO<sub>4</sub>) and concentrated under reduced pressure. Flash chromatography (SiO<sub>2</sub>, 10% Et<sub>2</sub>O/hexanes) gave **S2** (9.13 g, 91%) as a clear, pale yellow liquid: <sup>1</sup>H NMR (300 MHz, CDCl<sub>3</sub>) δ 4.54 (m, 1H), 3.78 (m, 2H), 3.44 (m, 2H), 2.25 (dt, *J* = 6.8, 2.5 Hz, 2H), 1.89 (t, *J* = 2.5 Hz, 1H), 1.85–1.40 (m, 8H); <sup>13</sup>C NMR (75 MHz, CDCl<sub>3</sub>) δ 98.7, 83.8, 68.4, 65.7, 62.1, 30.6, 28.6, 25.4, 19.4, 15.2.

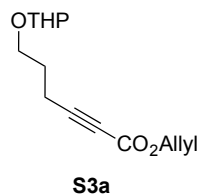

**Compound S3a.** *n*-BuLi (6.53 mmol, 2.61 mL of a 2.5 M solution in hexanes) was added dropwise to a solution of **S2** (1.0 g, 5.94 mmol) in THF (11.9 mL) at -78 °C. After 1 h, allyl chloroformate (2.15 g, 17.8 mmol) was added dropwise and the resulting mixture was warmed to room temperature over 4 h. The reaction mixture was poured into saturated aqueous NaHCO<sub>3</sub> (100 mL) and extracted with Et<sub>2</sub>O (3 × 50 mL). The combined organic extracts were washed with saturated aqueous NaCl, dried (Na<sub>2</sub>SO<sub>4</sub>)

and concentrated under reduced pressure. Flash chromatography (SiO<sub>2</sub>, 20% Et<sub>2</sub>O/hexanes) gave **S3a** (1.34 g, 89%) as a pale yellow oil: <sup>1</sup>H NMR (600 MHz, CDCl<sub>3</sub>) δ 5.88 (ddt, *J* = 17.0, 10.5, 6.0 Hz, 1H), 5.31 (dq, *J* = 17.0, 1.4 Hz, 1H), 5.23 (dq, *J* = 10.5, 1.4 Hz, 1H), 4.60 (dt, *J* = 6.0, 1.2 Hz, 2H), 4.56 (dd, *J* = 4.2, 2.9 Hz, 1H), 3.82–3.78 (m, 1H), 3.77 (dt, *J* = 9.6, 6.0 Hz, 1H), 3.48–3.44 (m, 1H), 3.42 (dt, *J* = 10.2, 6.0 Hz, 1H), 2.43 (dt, *J* = 7.4, 2.8 Hz, 2H), 1.87–1.82 (m, 2H), 1.79–1.71 (m, 1H), 1.68–1.64 (m, 1H), 1.56–1.44 (m, 4H); <sup>13</sup>C NMR (150 MHz, CDCl<sub>3</sub>) δ 153.3, 131.2, 119.1, 98.7, 89.2, 72.9, 66.2, 65.4, 62.2, 30.5, 27.7, 25.3, 19.4, 15.6; IR (neat) ν<sub>max</sub> 2941, 2870, 1709, 1442, 1357, 1322, 1237, 1200, 1157, 1134, 1120, 1062, 1032, 987, 935, 868, 813, 750 cm<sup>-1</sup>; ESI-TOF HRMS *m/z* 275.1265 (M+Na<sup>+</sup>, C<sub>14</sub>H<sub>20</sub>O<sub>4</sub>Na requires 275.1254).

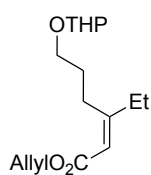

**S4a**

**Compound S4a.** Ethylmagnesium bromide (59.2 mmol, 59.2 mL of a 1 M solution in THF) was added dropwise to a suspension of CuI (11.3 g, 59.2 mmol) in THF (164 mL) at -45 °C. TMEDA (17.2 g, 148 mmol) was added dropwise. The resulting mixture was stirred for 30 min at -45 °C then cooled to -78 °C. Alkyne **S3a** (12.45 g, 49.3 mmol) was added slowly as a solution in THF (ca. 10 mL). After stirring for 1.5 h at -78 °C, the reaction was quenched by addition of MeOH (15 mL) via syringe pump at a rate of 5 mL/h. Saturated aqueous NH<sub>4</sub>Cl (60 mL) was added dropwise and the mixture warmed to room temperature and poured into saturated aqueous NH<sub>4</sub>Cl (600 mL). The layers were separated and the aqueous layer was extracted with Et<sub>2</sub>O (2 × 200 mL). The combined organic extracts were washed with saturated aqueous NH<sub>4</sub>Cl (3 × 200 mL) and saturated aqueous NaCl then dried (Na<sub>2</sub>SO<sub>4</sub>) and concentrated under reduced pressure. Flash chromatography (SiO<sub>2</sub>, 10% EtOAc/hexanes) gave **S4a** (10.48 g, 75%) as a clear, colorless oil. Good selectivity for the *Z* over *E* isomer was strongly dependent upon the slow quench with MeOH. It can be difficult to maintain magnetic stirring for during the quench due to precipitated copper salts, and there may be a correlation between a lack of stirring during the quench and low selectivity: <sup>1</sup>H NMR (500 MHz, CDCl<sub>3</sub>) δ 5.93 (ddt, *J* = 17.3, 10.5, 5.6 Hz, 1H), 5.66 (s, 1H), 5.30 (dq, *J* = 17.3, 1.4 Hz, 1H), 5.21 (dq, *J* = 10.5, 1.4 Hz, 1H), 4.57 (dt, *J* = 5.5, 1.5 Hz, 2H), 4.56 (m, 1H), 3.85 (ddd, *J* = 11.5, 7.8, 3.5 Hz, 1H), 3.75 (dt, *J* = 9.5, 7.0 Hz, 1H), 3.50–3.45 (m, 1H), 3.41 (dt, *J* = 10.0, 6.8 Hz, 1H), 2.67 (m, 2H), 2.20 (dq, *J* = 7.5, 1.5 Hz, 2H), 1.85–1.65 (m, 4H), 1.58–1.47 (m, 4H), 1.05 (t, *J* = 7.5 Hz, 3H); <sup>13</sup>C NMR (125 MHz, CDCl<sub>3</sub>) δ 166.1, 166.0, 132.6, 117.8, 114.2, 98.8, 67.4, 64.3, 62.3, 31.2, 30.7, 29.0, 28.7, 25.5, 19.6, 12.0; IR (neat) ν<sub>max</sub> 2939, 2872, 1714, 1642, 1453, 1383, 1318, 1227, 1176, 1137, 1075, 1029, 989, 928, 866, 813, 751 cm<sup>-1</sup>; ESI-TOF HRMS *m/z* 305.1736 (M+Na<sup>+</sup>, C<sub>16</sub>H<sub>26</sub>O<sub>4</sub>Na requires 305.1723).

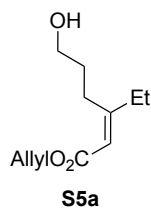

**Compound S5a.** *p*-TsOH (356 mg, 1.87 mmol) was added to a mixture of **S4a** (5.29 g, 18.7 mmol) in MeOH (93.5 mL). After stirring for 2 h, the mixture was poured into saturated aqueous NaHCO<sub>3</sub> (500 mL) and extracted with Et<sub>2</sub>O (3×100 mL). The combined organic extracts were washed with saturated aqueous NaCl, dried (Na<sub>2</sub>SO<sub>4</sub>) and concentrated under reduced pressure. Flash chromatography (SiO<sub>2</sub>, 30% EtOAc/hexanes) provided **S5a** (3.73 g, quant.) as a clear, colorless oil: <sup>1</sup>H NMR (400 MHz, CDCl<sub>3</sub>) δ 5.92 (ddt, *J* = 17.2, 10.4, 5.6 Hz, 1H), 5.76 (s, 1H), 5.31 (dq, *J* = 17.2, 1.4 Hz, 1H), 5.22 (dq, *J* = 10.4, 1.4 Hz, 1H), 4.59 (dt, *J* = 6.0, 1.4 Hz, 2H), 3.55 (m, 2H), 2.70 (t, *J* = 7.0 Hz, 2H), 2.17 (dq, *J* = 7.4, 1.4 Hz, 2H), 1.73 (m, 2H), 1.06 (t, *J* = 7.4 Hz, 3H); <sup>13</sup>C NMR (150 MHz, CDCl<sub>3</sub>) δ 167.2, 165.7, 132.2, 118.3, 115.0, 64.8, 60.7, 30.7, 30.6, 27.8, 12.0; IR (neat) ν<sub>max</sub> 3411, 2967, 2938, 2877, 1713, 1641, 1454, 1421, 1389, 1314, 1216, 1165, 1143, 1058, 1030, 994, 930, 867 cm<sup>-1</sup>; ESI-TOF HRMS *m/z* 199.1332 (M+H<sup>+</sup>, C<sub>11</sub>H<sub>19</sub>O<sub>3</sub> requires 199.1329).

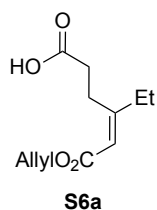

**Compound S6a.** DMSO (5.88 g, 75.2 mmol) was added to a mixture of oxalyl chloride (4.78 g, 37.6 mmol) in CH<sub>2</sub>Cl<sub>2</sub> (188 mL) at -78 °C. After 30 min, alcohol **S5a** (3.73 g, 18.8 mmol) was added and after a further 30 min Et<sub>3</sub>N (11.41 g, 112.8 mmol) was added. The mixture was allowed to warm to room temperature over 1 h, then poured into water (500 mL). The layers were separated and the aqueous layer was extracted with CH<sub>2</sub>Cl<sub>2</sub> (2×100 mL). The combined organic extracts were washed with aqueous 0.1 N HCl (100 mL), saturated aqueous NaHCO<sub>3</sub> (100 mL) and saturated aqueous NaCl then dried (Na<sub>2</sub>SO<sub>4</sub>) and concentrated under reduced pressure. The crude aldehyde was used immediately. A solution of NaClO<sub>2</sub> (5.10 g, 56.4 mmol) and NaH<sub>2</sub>PO<sub>4</sub> (10.38 g, 75.2 mmol) in water (51 mL) was added to a mixture of aldehyde (18.8 mmol), 2-methyl-2-butene (376 mL) and *t*-BuOH (376 mL) at 0 °C. The mixture was warmed to room temperature over 4 h, then poured into water (1.5 L). The layers were separated and the aqueous layer was extracted with EtOAc (2×300 mL). The combined organic extracts were washed with saturated aqueous NaCl, dried (Na<sub>2</sub>SO<sub>4</sub>) and concentrated under reduced pressure. Flash chromatography (SiO<sub>2</sub>, 20% EtOAc/hexanes then 40:59:1 EtOAc/hexanes/AcOH) gave **S6a** (3.46 g, 87%) as a clear, pale yellow oil: <sup>1</sup>H NMR (400 MHz, CDCl<sub>3</sub>) δ 5.93 (ddt, *J* = 17.2, 10.4, 5.8 Hz, 1H), 5.71 (s, 1H), 5.31 (dq, *J* = 17.2, 1.6 Hz, 1H), 5.22 (dq, *J* = 10.4, 1.6 Hz, 1H), 4.59 (dt, *J* = 6.0, 1.4 Hz, 2H), 2.87 (m, 2H), 2.53 (m, 2H), 2.20 (dq, *J* = 7.4, 1.4 Hz, 2H), 1.07 (t, *J* = 7.4 Hz, 3H); <sup>13</sup>C NMR

(150 MHz, CDCl<sub>3</sub>)  $\delta$  178.1, 165.9, 163.8, 132.4, 118.2, 115.3, 64.6, 32.8, 31.4, 27.5, 11.9; IR (neat)  $\nu_{\max}$  2969, 1709, 1419, 1263, 1219, 1166, 1084, 1018, 994, 931, 869, 800 cm<sup>-1</sup>; ESI-TOF HRMS  $m/z$  213.1128 (M+H<sup>+</sup>, C<sub>11</sub>H<sub>17</sub>O<sub>4</sub> requires 213.1121).

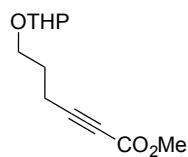

**S3b**

**Compound S3b.** *n*-BuLi (14.8 mmol, 6.22 mL of a 2.5 M solution in hexanes) was added dropwise to a solution of **S2** (2.49 g, 14.8 mmol) in THF (30 mL) at -78 °C. After 1 h, methyl chloroformate (4.20 g, 44.4 mmol) was added dropwise and the resulting mixture was warmed to room temperature over 4 h. The reaction mixture was poured into saturated aqueous NaHCO<sub>3</sub> (250 mL) and extracted with Et<sub>2</sub>O (3 × 100 mL). The combined organic extracts were washed with saturated aqueous NaCl, dried (Na<sub>2</sub>SO<sub>4</sub>) and concentrated under reduced pressure. Flash chromatography (SiO<sub>2</sub>, 20% Et<sub>2</sub>O/hexanes) gave **S3b** (3.23 g, 96%) as a pale yellow oil: <sup>1</sup>H NMR (300 MHz, CDCl<sub>3</sub>)  $\delta$  4.52 (br t, *J* = 3.3 Hz, 1H), 3.81–3.72 (m, 2H), 3.69 (s, 3H), 3.48–3.37 (m, 2H), 2.41 (t, *J* = 7.2 Hz, 2H), 1.80 (p, *J* = 6.6 Hz, 2H), 1.74–1.43 (m, 6H); <sup>13</sup>C NMR (75 MHz, CDCl<sub>3</sub>)  $\delta$  154.0, 98.7, 89.1, 72.9, 65.4, 62.1, 52.4, 30.5, 27.7, 25.3, 19.4, 15.6; IR (neat)  $\nu_{\max}$  2944, 2872, 1712, 1434, 1248, 1199, 1120, 1135, 1062, 1032, 986, 868, 813, 751 cm<sup>-1</sup>; ESI-TOF HRMS  $m/z$  227.1279 (M+H<sup>+</sup>, C<sub>12</sub>H<sub>18</sub>O<sub>4</sub> requires 227.1278).

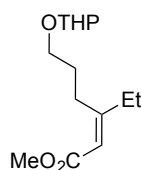

**S4b**

**Compound S4b.** Ethylmagnesium bromide (12.2 mmol, 12.2 mL of a 1 M solution in THF) was added dropwise to a suspension of CuI (2.53 g, 13.3 mmol) in THF (37 mL) at -45 °C. TMEDA (3.87 g, 33.3 mmol) was added dropwise. The resulting mixture was stirred for 30 min at -45 °C, then cooled to -78 °C. Alkyne **S3b** (2.5 g, 11.1 mmol) was added slowly as a solution in THF (ca. 5 mL). After stirring for 1.5 h at -78 °C, the reaction was quenched by addition of MeOH (5 mL) via syringe pump at a rate of 5 mL/h. Saturated aqueous NH<sub>4</sub>Cl (10 mL) was added dropwise and the mixture warmed to room temperature and poured into saturated aqueous NH<sub>4</sub>Cl (300 mL). The layers were separated and the aqueous layer was extracted with Et<sub>2</sub>O (3 × 100 mL). The combined organic extracts were washed with saturated aqueous NH<sub>4</sub>Cl (3 × 100 mL) and saturated aqueous NaCl, then dried (Na<sub>2</sub>SO<sub>4</sub>) and concentrated under reduced pressure. Flash chromatography (SiO<sub>2</sub>, 10% EtOAc/hexanes) gave **S4b** (2.3 g, 82%) as a clear, colorless oil: <sup>1</sup>H NMR (600 MHz, CDCl<sub>3</sub>)  $\delta$  5.60 (s, 1H), 4.53 (dd, *J* = 4.4, 3.3 Hz, 1H), 3.82 (ddd, *J* = 10.8, 8.1, 3.0 Hz, 1H), 3.72 (dt, *J* = 9.6, 6.6 Hz, 1H), 3.63 (s, 3H), 3.47–3.43 (m, 1H), 3.39 (dt, *J* = 9.6, 6.6 Hz, 1H), 2.63 (m, 2H), 2.16 (dq, *J* = 7.4, 1.2 Hz, 2H), 1.80–1.76 (m, 1H), 1.72 (p, *J* = 7.4 Hz, 2H), 1.68–1.63 (m, 1H), 1.55–1.45 (m, 4H), 1.01 (t, *J* = 7.2 Hz, 1H); <sup>13</sup>C NMR (150 MHz, CDCl<sub>3</sub>)  $\delta$  166.9, 165.7, 114.0,

98.7, 67.4, 62.2, 50.7, 31.1, 30.7, 28.9, 28.6, 25.4, 19.6, 12.0; IR (neat)  $\nu_{\max}$  2941, 2871, 1716, 1643, 1435, 1369, 1319, 1227, 1177, 1145, 1119, 1075, 1029, 989, 903, 866, 813, 733  $\text{cm}^{-1}$ ; ESI-TOF HRMS  $m/z$  279.1566 ( $\text{M}+\text{Na}^+$ ,  $\text{C}_{14}\text{H}_{24}\text{O}_4\text{Na}$  requires 279.1567).

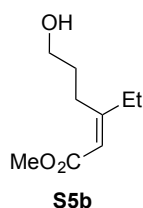

**Compound S5b.** *p*-TsOH (347 mg, 1.82 mmol) was added to a mixture of **S4b** (4.67 g, 18.2 mmol) in MeOH (91 mL). After stirring for 2 h, the mixture was poured into saturated aqueous  $\text{NaHCO}_3$  (500 mL) and extracted with  $\text{Et}_2\text{O}$  ( $3 \times 100$  mL). The combined organic extracts were washed with saturated aqueous NaCl, dried ( $\text{Na}_2\text{SO}_4$ ) and concentrated under reduced pressure. Flash chromatography (30–50% EtOAc/hexanes gradient) provided **S5b** (3.03 g, quant.) as a clear, colorless oil:  $^1\text{H}$  NMR (300 MHz,  $\text{CDCl}_3$ )  $\delta$  5.73 (s, 1H), 3.68 (s, 3H), 3.54 (q,  $J = 6.0$  Hz, 2H), 3.05 (t,  $J = 6.6$  Hz, 1H), 2.70 (t,  $J = 7.1$  Hz, 2H), 2.17 (q,  $J = 7.5$  Hz, 2H), 1.73 (p,  $J = 6.4$  Hz, 2H), 1.06 (t,  $J = 7.4$  Hz, 3H);  $^{13}\text{C}$  NMR (150 MHz,  $\text{CDCl}_3$ )  $\delta$  168.0, 165.4, 114.9, 60.7, 51.2, 30.60, 30.58, 27.7, 12.0; IR (neat)  $\nu_{\max}$  3411 (br), 2945, 2876, 1713, 1641, 1434, 1373, 1316, 1220, 1166, 1027, 978, 909, 865, 801, 730  $\text{cm}^{-1}$ ; ESI-TOF HRMS  $m/z$  173.1173 ( $\text{M}+\text{H}^+$ ,  $\text{C}_9\text{H}_{17}\text{O}_3$  requires 173.1172).

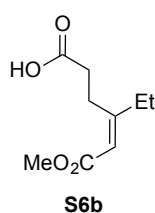

**Compound S6b.** DMSO (5.44 g, 69.9 mmol) was added to a mixture of oxalyl chloride (4.42 g, 34.8 mmol) in  $\text{CH}_2\text{Cl}_2$  (174 mL) at  $-78$   $^\circ\text{C}$ . After 30 min, alcohol **S5b** (3.0 g, 17.4 mmol) was added and after a further 30 min  $\text{Et}_3\text{N}$  (10.56 g, 104 mmol) was added. The mixture was allowed to warm to room temperature over 1 h, then poured into water (500 mL). The layers were separated and the aqueous layer was extracted with  $\text{CH}_2\text{Cl}_2$  ( $2 \times 100$  mL). The combined organic extracts were washed with aqueous 0.1 N HCl (150 mL), saturated aqueous  $\text{NaHCO}_3$  (150 mL) and saturated aqueous NaCl then dried ( $\text{Na}_2\text{SO}_4$ ) and concentrated under reduced pressure. The crude aldehyde was used immediately. A solution of  $\text{NaClO}_2$  (4.72 g, 52.2 mmol) and  $\text{NaH}_2\text{PO}_4$  (9.60 g, 69.6 mmol) in water (47 mL) was added to a mixture of aldehyde (17.4 mmol), 2-methyl-2-butene (348 mL) and *t*-BuOH (348 mL) at 0  $^\circ\text{C}$ . The mixture was warmed to room temperature over 4 h, then poured into water (1.5 L). The layers were separated and the aqueous layer was extracted with EtOAc ( $2 \times 300$  mL). The combined organic extracts were washed with saturated aqueous NaCl, dried ( $\text{Na}_2\text{SO}_4$ ) and concentrated under reduced pressure. Flash chromatography ( $\text{SiO}_2$ , 20% EtOAc/hexanes then 40:59:1 EtOAc/hexanes/AcOH) gave **S6b** (2.51 g, 78%) as a clear, pale yellow oil:  $^1\text{H}$  NMR (600 MHz,  $\text{CDCl}_3$ )  $\delta$  5.67 (br s, 1H), 3.67 (s, 3H), 2.86 (m, 2H), 2.52 (m, 2H), 2.19 (q,

$J = 7.2$  Hz, 2H), 1.05 (t,  $J = 7.4$  Hz, 3H);  $^{13}\text{C}$  NMR (150 MHz,  $\text{CDCl}_3$ )  $\delta$  178.9, 166.7, 163.4, 115.2, 51.0, 32.8, 31.4, 27.4, 11.9; IR (neat)  $\nu_{\text{max}}$  2969, 1706, 1435, 1392, 1284, 1221, 1168, 1085, 1061, 1028, 923, 869, 838, 803  $\text{cm}^{-1}$ ; ESI-TOF HRMS  $m/z$  187.0969 ( $\text{M}+\text{H}^+$ ,  $\text{C}_9\text{H}_{15}\text{O}_4$  requires 187.0965).

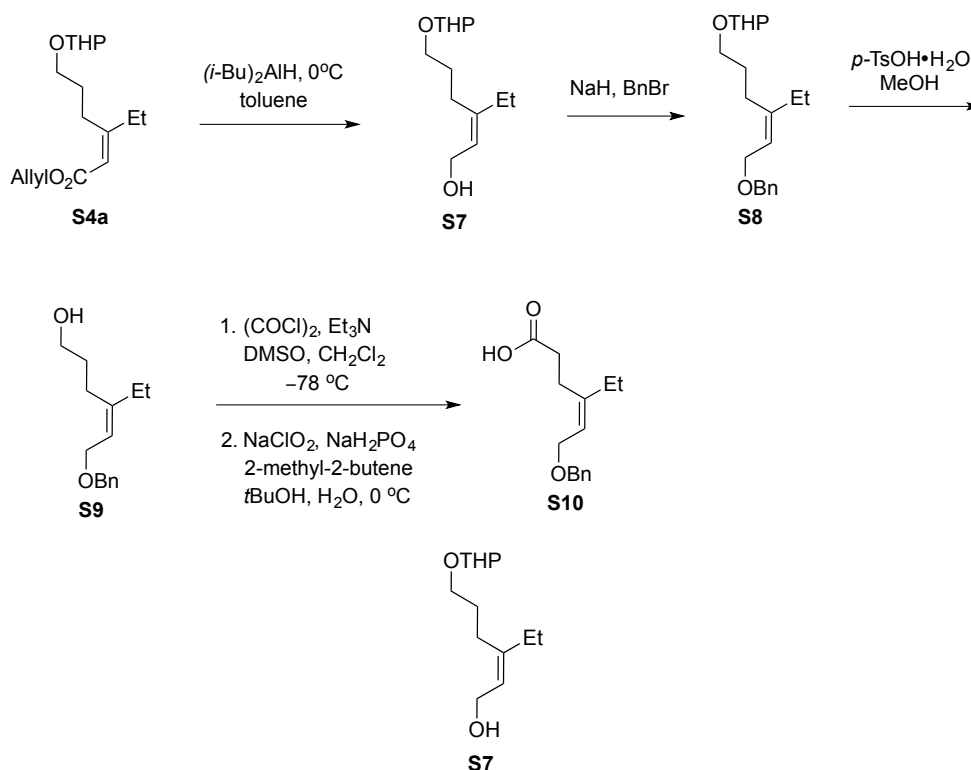

**Compound S7.** Diisobutylaluminum hydride (35 mmol, 35 mL of 1 M solution in hexanes) was added dropwise to a solution of **S4a** (4.7 g, 16.7 mmol) in toluene (56 mL) at  $0^\circ\text{C}$ . The resulting mixture was stirred for 30 min at  $0^\circ\text{C}$ . The reaction was quenched by addition of  $\text{MeOH}$  (100 mL) and filtered through celite. Flash chromatography ( $\text{SiO}_2$ , 50%  $\text{EtOAc}$ /hexanes) gave **7** (3.43 g, 90%) as a clear, colorless oil:  $^1\text{H}$  NMR (500 MHz,  $\text{CDCl}_3$ )  $\delta$  5.49 (t,  $J = 7.3$  Hz, 1H), 4.53–4.51 (m, 1H), 4.21 (dd,  $J = 12.2$ , 7.9 Hz, 1H), 4.06 (dd,  $J = 12.2$ , 6.6 Hz, 1H), 3.95–3.84 (m, 1H), 3.72 (ddd,  $J = 9.7$ , 7.8, 5.3 Hz, 1H), 3.51–3.46 (m, 1H), 3.39 (dt,  $J = 9.7$ , 5.7 Hz, 1H), 2.30 (dt,  $J = 13.5$ , 7.7 Hz, 1H), 2.20–2.09 (m, 2H), 2.04 (q,  $J = 7.5$  Hz, 2H), 1.88–1.77 (m, 1H), 1.77–1.61 (m, 3H), 1.61–1.46 (m, 4H), 1.02 (t,  $J = 7.5$  Hz, 3H);  $^{13}\text{C}$  NMR (125 MHz,  $\text{CDCl}_3$ )  $\delta$  143.8, 123.7, 99.3, 66.4, 63.1, 58.6, 30.9, 29.0, 27.9, 26.3, 25.4, 20.1, 12.5; IR (neat)  $\nu_{\text{max}}$  3512, 2939, 2871, 1456, 1176, 1136, 1024  $\text{cm}^{-1}$ ; ESI-TOF HRMS  $m/z$  228.1801 ( $\text{M}+\text{H}^+$ ,  $\text{C}_{13}\text{H}_{24}\text{O}$  requires 228.1798).

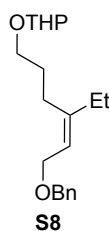

**Compound S8.** Alcohol **S7** (202 mg, 0.89 mmol) was added to a suspension of  $\text{NaH}$  (24 mg, 1.00 mmol) in THF (6 mL) at  $0^\circ\text{C}$ . After 20 min, benzyl bromide (119  $\mu\text{L}$ ,

1.00 mmol) was added and the resulting mixture was allowed to warm to room temperature and stir for 24 h. The reaction was quenched with the addition of saturated aqueous  $\text{NH}_4\text{Cl}$  and the reaction mixture was extracted with  $\text{CH}_2\text{Cl}_2$  then dried ( $\text{Na}_2\text{SO}_4$ ) and concentrated under reduced pressure. Flash chromatography ( $\text{SiO}_2$ , 10% EtOAc/hexanes) provided **S8** (246 mg, 87%) as a clear, yellow oil:  $^1\text{H}$  NMR (600 MHz,  $\text{CDCl}_3$ )  $\delta$  7.36–7.26 (m, 5H), 5.41 (t,  $J = 6.8$  Hz, 1H), 4.56–4.54 (m, 1H), 4.51 (s, 2H), 4.05 (d,  $J = 6.8$  Hz, 2H), 3.85 (ddd,  $J = 11.1, 7.6, 3.3$  Hz, 1H), 3.69 (dt,  $J = 9.6, 6.6$  Hz, 1H), 3.49 (dt,  $J = 10.7, 5.1$  Hz, 1H), 3.34 (dt,  $J = 9.6, 6.6$  Hz, 1H), 2.17–2.05 (m, 4H), 1.85–1.53 (m, 8H), 1.03 (t,  $J = 7.4$  Hz, 3H);  $^{13}\text{C}$  NMR (150 MHz,  $\text{CDCl}_3$ )  $\delta$  145.6, 138.7, 128.5, 127.9, 127.7, 120.4, 99.0, 72.3, 67.2, 66.7, 62.5, 30.9, 29.5, 28.8, 27.4, 25.6, 19.8, 12.6; IR (neat)  $\nu_{\text{max}}$  2937, 2868, 1453, 1072, 1030  $\text{cm}^{-1}$ ; ESI-TOF HRMS  $m/z$  319.2268 ( $\text{M}+\text{H}^+$ ,  $\text{C}_{20}\text{H}_{30}\text{O}_3$  requires 319.2268).

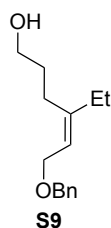

**Compound S9.** *p*-TsOH (104 mg, 0.55 mmol) was added to a mixture of **S8** (3.51 g, 11 mmol) in MeOH (50 mL). After stirring for 2 h, the mixture was diluted with saturated aqueous  $\text{NH}_4\text{Cl}$  (4 mL) and extracted with  $\text{CH}_2\text{Cl}_2$  ( $3 \times 20$  mL). The combined organic extracts were washed with saturated aqueous  $\text{NaHCO}_3$  (2 mL) and saturated aqueous NaCl then dried ( $\text{Na}_2\text{SO}_4$ ) and concentrated under reduced pressure. Flash chromatography ( $\text{SiO}_2$ , 35% EtOAc/hexanes) gave **9** (2.24 g, 87%) as a clear, colorless oil:  $^1\text{H}$  NMR (500 MHz,  $\text{CDCl}_3$ )  $\delta$  7.36–7.27 (m, 5H), 5.49 (t,  $J = 7.2$  Hz, 1H), 4.53 (s, 2H), 4.02 (d,  $J = 7.1$  Hz, 2H), 3.56 (q,  $J = 6.0$  Hz, 2H), 2.19 (t,  $J = 7.4$  Hz, 2H), 2.09–2.04 (m, 2H), 1.67–1.61 (m, 2H), 1.03 (t,  $J = 7.4$  Hz, 3H);  $^{13}\text{C}$  NMR (125 MHz,  $\text{CDCl}_3$ )  $\delta$  146.8, 138.3, 128.5, 128.2, 127.8, 120.1, 72.6, 66.1, 61.9, 30.8, 29.1, 26.4, 12.5; IR (neat)  $\nu_{\text{max}}$  3402 (br), 2961, 2869, 1454, 1059, 1029  $\text{cm}^{-1}$ ; ESI-TOF HRMS  $m/z$  235.1693 ( $\text{M}+\text{H}^+$ ,  $\text{C}_{15}\text{H}_{22}\text{O}_2$  requires 235.1692).

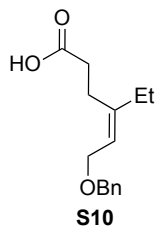

**Compound S10.** DMSO (2.67 mL, 37.6 mmol) was added to a mixture of oxalyl chloride (1.59 mL, 18.8 mmol) in  $\text{CH}_2\text{Cl}_2$  (150 mL) at  $-78$  °C. After 30 min, alcohol **S9** (2.20 g, 9.4 mmol) was added and after a further 30 min  $\text{Et}_3\text{N}$  (7.86 mL, 56.4 mmol) was added. The mixture was allowed to warm to room temperature over 1 h, then poured into water (100 mL). The layers were separated and the aqueous layer was extracted with  $\text{CH}_2\text{Cl}_2$  ( $2 \times 100$  mL). The combined organic extracts were washed with aqueous 0.1 N HCl and saturated aqueous  $\text{NaHCO}_3$  (100 mL each) and saturated aqueous NaCl then dried ( $\text{Na}_2\text{SO}_4$ ) and concentrated under reduced pressure. The crude



aldehyde was used immediately. A solution of NaClO<sub>2</sub> (3.19 g, 28.2 mmol) and NaH<sub>2</sub>PO<sub>4</sub> (5.87 g, 37.6 mmol) in water (10 mL) was added to a mixture of aldehyde (9.4 mmol), 2-methyl-2-butene (50 mL) and *t*-BuOH (160 mL) at 0 °C. The mixture was warmed to room temperature over 2 h, then poured into water (1.5 L). The layers were separated and the aqueous layer was extracted with EtOAc (2×300 mL). The combined organic extracts were washed with saturated aqueous NaCl, dried (Na<sub>2</sub>SO<sub>4</sub>) and concentrated under reduced pressure. Flash chromatography (SiO<sub>2</sub>, 20% EtOAc/hexanes) gave **S10** (1.67 g, 72%) as a clear, pale yellow oil: <sup>1</sup>H NMR (500 MHz, CDCl<sub>3</sub>) δ 7.37–7.27 (m, 5H), 5.47 (t, *J* = 6.7 Hz, 1H), 4.52 (s, 2H), 4.07 (d, *J* = 6.7 Hz, 2H), 2.41–2.40 (m, 4H), 2.07 (q, *J* = 7.3 Hz, 2H), 1.03 (t, *J* = 7.4 Hz, 3H); <sup>13</sup>C NMR (150 MHz, CDCl<sub>3</sub>) δ 179.3, 143.8, 138.3, 128.5, 128.0, 127.7, 121.5, 72.4, 66.4, 33.2, 29.2, 25.8, 12.5; IR (neat) ν<sub>max</sub> 3500–2500 (br), 2964, 2872, 1704, 1453, 1069 cm<sup>-1</sup>; ESI-TOF HRMS *m/z* 249.1485 (M+H<sup>+</sup>, C<sub>15</sub>H<sub>20</sub>O<sub>3</sub> requires 249.1485).

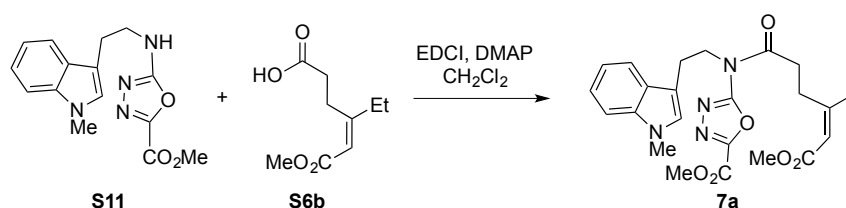

**Compound 7a.** EDCI (516 mg, 2.69 mmol) and DMAP (328 mg, 2.69 mmol) were added to a solution of **S6b** (500 mg, 2.69 mmol) in CH<sub>2</sub>Cl<sub>2</sub> (50 mL) and oxadiazole **S11**<sup>S1</sup> (269 mg, 0.90 mmol) was added. After stirring for 2.5 h, the mixture was concentrated under reduced pressure. Flash chromatography (SiO<sub>2</sub>, 25–35% EtOAc/hexanes gradient) gave **7a** (300 mg, 71%) as a white solid: <sup>1</sup>H NMR (500 MHz, CDCl<sub>3</sub>) δ 7.69 (dt, *J* = 7.9, 1.1 Hz, 1H), 7.26–7.24 (m, 1H), 7.20 (ddd, *J* = 8.1, 6.8, 1.2 Hz, 1H), 7.11 (ddd, *J* = 8.0, 6.8, 1.2 Hz, 1H), 6.87 (s, 1H), 5.68 (s, 1H), 4.22 (t, *J* = 7.6 Hz, 1H), 3.99 (s, 3H), 3.72 (s, 3H), 3.64 (s, 3H), 3.12 (dd, *J* = 8.5, 6.6 Hz, 2H), 3.04–2.97 (m, 2H), 2.97–2.88 (m, 2H), 2.21 (q, *J* = 7.3 Hz, 2H), 1.08 (t, *J* = 7.3 Hz, 3H); <sup>13</sup>C NMR (150 MHz, CDCl<sub>3</sub>) δ 171.8, 166.8, 163.6, 162.1, 154.2, 153.5, 137.1, 127.7, 127.6, 121.8, 119.2, 119.0, 115.4, 110.1, 109.3, 53.7, 51.1, 48.0, 35.1, 32.7, 31.5, 27.9, 24.4, 12.1; IR (neat) ν<sub>max</sub> 2947, 1749, 1711, 1565, 1153 cm<sup>-1</sup>; ESI-TOF HRMS *m/z* 469.2078 (M+H<sup>+</sup>, C<sub>24</sub>H<sub>28</sub>N<sub>4</sub>O<sub>6</sub> requires 469.2082).

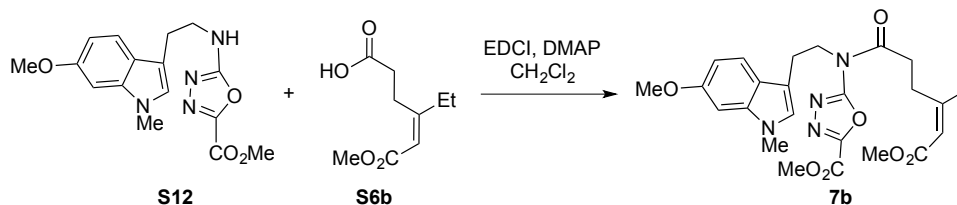

**Compound 7b.** EDCI (2.59 g, 13.5 mmol) and DMAP (13.5 mmol) were added to a mixture of **S12**<sup>S1</sup> (2.23 g, 6.74 mmol) and **S6b** (2.51 g, 13.5 mmol) in CH<sub>2</sub>Cl<sub>2</sub> (67.4 mL). After stirring for 1.25 h, the solvent was evaporated under reduced pressure to give the crude residue. Flash chromatography (SiO<sub>2</sub>, 50% EtOAc/hexanes) gave **7b** (2.71 g, 81%) as a pale yellow solid: <sup>1</sup>H NMR (600 MHz, CDCl<sub>3</sub>) δ 7.52 (d, *J* = 8.6 Hz, 1H), 6.75 (dd, *J* = 8.6, 2.3 Hz, 1H), 6.72 (s, 1H), 6.66 (d, *J* = 2.3 Hz, 1H), 5.65 (s, 1H),

4.18 (t,  $J = 7.5$  Hz, 2H), 3.96 (s, 3H), 3.84 (s, 3H), 3.622 (s, 3H), 3.617 (s, 3H), 3.04 (t,  $J = 7.5$  Hz, 2H), 2.97 (t,  $J = 7.7$  Hz, 2H), 2.89 (t,  $J = 7.7$  Hz, 2H), 2.18 (dq,  $J = 7.2, 1.2$  Hz, 2H), 1.05 (t,  $J = 7.2$  Hz, 3H);  $^{13}\text{C}$  NMR (150 MHz,  $\text{CDCl}_3$ )  $\delta$  171.6, 166.6, 163.5, 161.9, 156.4, 154.0, 153.2, 137.6, 126.4, 121.7, 119.5, 115.2, 109.8, 109.0, 92.6, 55.6, 53.5, 50.9, 47.7, 34.9, 32.5, 31.3, 27.7, 24.3, 11.9; mp 112–113 °C; IR (neat)  $\nu_{\text{max}}$  2050, 1748, 1709, 1644, 1623, 1564, 1439, 1412, 1385, 1332, 1256, 1225, 1154, 1067, 1033, 911, 870, 813, 729, 677, 638  $\text{cm}^{-1}$ ; ESI-TOF HRMS  $m/z$  499.2183 ( $\text{M}+\text{H}^+$ ,  $\text{C}_{25}\text{H}_{31}\text{N}_4\text{O}_7$  requires 499.2187).

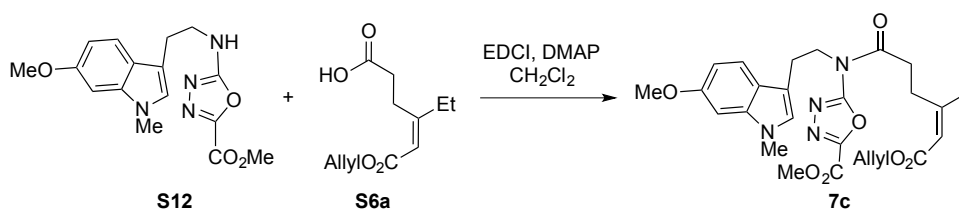

**Compound 7c.** EDCI (1.39 g, 7.27 mmol), DMAP (887 mg, 7.27 mmol) and **S6a** (800 mg, 2.42 mmol) were added to a mixture of **S12** (1.54 g, 7.27 mmol) in  $\text{CH}_2\text{Cl}_2$  (72.7 mL). After stirring for 1.5 h, the volatiles were evaporated under reduced pressure and the crude residue purified directly by flash chromatography ( $\text{SiO}_2$ , 40% EtOAc/hexanes) to give **7c** (1.06 g, 84%) as a pale yellow solid:  $^1\text{H}$  NMR (600 MHz,  $\text{CDCl}_3$ )  $\delta$  7.53 (d,  $J = 8.5$  Hz, 1H), 6.76 (dd,  $J = 8.5, 2.3$  Hz, 1H), 6.72 (s, 1H), 6.67 (d,  $J = 2.3$  Hz, 1H), 5.89 (ddt,  $J = 16.8, 10.8, 6.0$  Hz, 1H), 6.72 (s, 1H), 5.30–5.26 (m, 1H), 5.20–5.18 (m, 1H), 4.53 (dt,  $J = 6.0, 1.2$  Hz, 2H), 4.18 (t,  $J = 7.5$  Hz, 2H), 3.97 (s, 3H), 3.84 (s, 3H), 3.63 (s, 3H), 3.04 (t,  $J = 7.5$  Hz, 2H), 2.97 (t,  $J = 7.8$  Hz, 2H), 2.90 (dd,  $J = 7.8$  Hz, 2H), 2.19 (q,  $J = 7.2$  Hz, 2H), 1.06 (t,  $J = 7.2$  Hz, 3H);  $^{13}\text{C}$  NMR (150 MHz,  $\text{CDCl}_3$ )  $\delta$  171.6, 165.7, 163.9, 161.9, 156.4, 154.0, 153.2, 137.6, 132.4, 126.4, 121.7, 119.5, 118.0, 115.3, 109.9, 109.0, 92.7, 64.4, 55.6, 53.5, 47.8, 34.9, 32.5, 31.3, 27.8, 24.3, 11.8; IR (neat)  $\nu_{\text{max}}$  2938, 1748, 1706, 1644, 1624, 1562, 1440, 1411, 1386, 1255, 1223, 1151, 1067, 1034, 991, 911, 869, 812, 729, 637  $\text{cm}^{-1}$ ; ESI-TOF HRMS  $m/z$  525.2345 ( $\text{M}+\text{H}^+$ ,  $\text{C}_{27}\text{H}_{33}\text{N}_4\text{O}_7$  requires 525.2345).

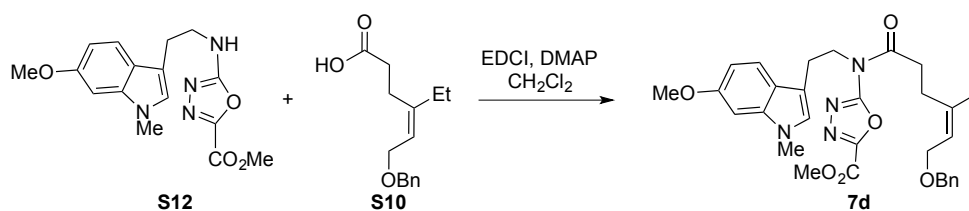

**Compound 7d.** EDCI (1.07 g, 5.6 mmol) and DMAP (683 mg, 5.6 mmol) were added to a solution of **S10** (1.4 g, 5.6 mmol) in  $\text{CH}_2\text{Cl}_2$  (50 mL) and oxadiazole **S12** (618 mg, 1.87 mmol) was added. After stirring for 2.5 h, the mixture was concentrated under reduced pressure. Flash chromatography ( $\text{SiO}_2$ , 20–50% EtOAc/hexanes gradient) gave **7d** (850 mg, 81%) as a white solid:  $^1\text{H}$  NMR (500 MHz,  $\text{CDCl}_3$ )  $\delta$  7.53 (d,  $J = 8.6$  Hz, 1H), 7.34–7.23 (m, 5H), 6.78 (dd,  $J = 8.6, 2.2$  Hz, 1H), 6.72 (s, 1H), 6.69 (d,  $J = 2.2$  Hz, 1H), 5.44 (t,  $J = 6.8$  Hz, 1H), 4.50 (s, 2H), 4.21–4.18 (m, 2H), 4.07 (d,  $J = 6.7$  Hz, 2H), 3.99 (s, 3H), 3.87 (s, 3H), 3.64 (s, 3H), 3.06 (t,  $J = 7.4$  Hz, 2H), 2.85 (dd,  $J = 9.0, 7.0$  Hz, 2H), 2.45 (dd,  $J = 8.9, 7.0$  Hz, 2H), 2.04 (qd,  $J = 7.7, 3.8$  Hz, 2H), 1.03 (t,  $J =$

7.4 Hz, 3H);  $^{13}\text{C}$  NMR (150 MHz,  $\text{CDCl}_3$ )  $\delta$  172.0, 162.0, 156.6, 154.1, 153.3, 143.9, 138.6, 137.8, 128.4, 127.9, 126.6, 121.8, 121.6, 119.6, 109.9, 109.2, 92.8, 72.4, 66.5, 55.8, 53.7, 47.9, 35.3, 32.7, 29.3, 26.2, 24.5, 12.5; IR (neat)  $\nu_{\text{max}}$  2960, 1747, 1702, 1623, 1560, 1439, 1408, 1255, 1149, 1067, 1035, 812, 729, 699  $\text{cm}^{-1}$ ; ESI-TOF HRMS  $m/z$  561.2703 ( $\text{M}+\text{H}^+$ ,  $\text{C}_{31}\text{H}_{36}\text{N}_4\text{O}_6$  requires 561.2707).

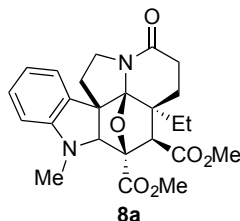

**Compound 8a.** Argon was bubbled through a mixture of **7a** (60 mg, 0.128 mmol) in triisopropylbenzene (64 mL). The vessel was sealed and heated at 230 °C for 24 h. Upon cooling to room temperature, the reaction mixture was filtered through a plug of silica gel which was washed thoroughly with hexanes before products were eluted with 10% MeOH/ $\text{CH}_2\text{Cl}_2$ . The solvent was evaporated under reduced pressure. Flash chromatography ( $\text{SiO}_2$ , 30–50% EtOAc/hexanes gradient) provided **8a** (26 mg, 46%) as a pale yellow foam:  $^1\text{H}$  NMR (500 MHz,  $\text{CDCl}_3$ )  $\delta$  7.19 (t,  $J = 7.7$  Hz, 1H), 6.87 (d,  $J = 7.4$  Hz, 1H), 6.68 (t,  $J = 7.3$  Hz, 1H), 6.53 (d,  $J = 8.0$  Hz, 1H), 4.00 (s, 2H), 3.98–3.93 (m, 1H), 3.86 (s, 3H), 3.66 (s, 3H), 3.59 (s, 1H), 2.92 (s, 3H), 2.51–2.45 (m, 1H), 2.40 (dd,  $J = 17.6, 5.2$  Hz, 1H), 2.33 (dd,  $J = 13.2, 5.2$  Hz, 1H), 2.27–2.21 (m, 2H), 1.46 (dd,  $J = 13.1, 5.3$  Hz, 1H), 1.03–0.97 (m, 1H), 0.70 (t,  $J = 7.5$  Hz, 3H), 0.59–0.53 (m, 1H);  $^{13}\text{C}$  NMR (150 MHz,  $\text{CDCl}_3$ )  $\delta$  171.2, 170.9, 170.0, 153.2, 129.7, 128.4, 123.7, 118.8, 108.2, 105.5, 87.5, 83.5, 65.2, 55.6, 52.7, 52.0, 48.3, 47.1, 37.7, 35.9, 28.7, 24.7, 23.5, 8.9; IR (neat)  $\nu_{\text{max}}$  2951, 1736, 1668, 1376, 1214  $\text{cm}^{-1}$ ; ESI-TOF HRMS  $m/z$  441.2037 ( $\text{M}+\text{H}^+$ ,  $\text{C}_{24}\text{H}_{28}\text{N}_2\text{O}_6$  requires 441.2026).

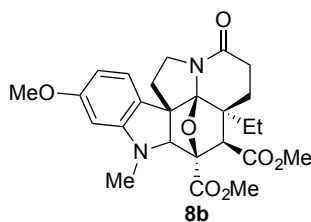

**Compound 8b.** Ar was bubbled through a mixture of **7b** (100 mg, 200  $\mu\text{mol}$ ) in triisopropylbenzene (100 mL) for 20 min. The reaction vessel was sealed and heated at 230 °C for 24 h. Upon cooling the reaction was filtered through a plug of  $\text{SiO}_2$ . Residual triisopropylbenzene was washed from the plug with hexanes and products were eluted with 10% MeOH/ $\text{CH}_2\text{Cl}_2$ . The solvent was evaporated under reduced pressure and flash chromatography ( $\text{SiO}_2$ , 40–100% EtOAc/hexanes gradient) gave **8b** (4.0 mg, 42%) as an off-white foam:  $^1\text{H}$  NMR (600 MHz,  $\text{CDCl}_3$ )  $\delta$  6.72 (d,  $J = 8.4$  Hz, 1H), 6.19 (dd,  $J = 8.4, 2.4$  Hz, 1H), 6.06 (d,  $J = 2.4$  Hz, 1H), 3.99 (s, 1H), 3.96–3.89 (m, 2H), 3.84 (s, 3H), 3.77 (s, 3H), 3.64 (s, 3H), 3.55 (s, 1H), 2.89 (s, 3H), 2.45 (dt,  $J = 12.6, 10.5$  Hz, 1H), 2.38 (dd,  $J = 17.4, 5.4$  Hz, 1H), 2.31 (td,  $J = 12.6, 5.4$  Hz, 1H), 2.22 (ddd,  $J = 17.7, 12.9, 5.4$  Hz, 1H), 2.16 (m, 1H), 1.45 (dd,  $J = 13.2, 5.4$  Hz, 1H), 1.01 (dq,  $J = 14.4, 7.2$  Hz, 1H), 0.72 (t,  $J = 7.2$  Hz, 3H), 0.65 (dq,  $J = 14.4, 7.2$  Hz, 1H);  $^{13}\text{C}$  NMR (150 MHz,

CDCl<sub>3</sub>)  $\delta$  171.1, 170.8, 169.8, 161.6, 154.4, 123.9, 120.7, 105.1, 103.2, 94.7, 87.2, 83.6, 64.3, 55.4, 54.4, 52.6, 51.8, 48.1, 46.8, 37.5, 35.5, 28.5, 24.6, 23.3, 8.9; IR (neat)  $\nu_{\max}$  2954, 1763, 1732, 1663, 1618, 1500, 1435, 1399, 1376, 1334, 1249, 1199, 1172, 1123, 1096, 1059, 1029, 936, 910, 890, 818, 728 cm<sup>-1</sup>; ESI-TOF HRMS  $m/z$  471.2125 (M+H<sup>+</sup>, C<sub>25</sub>H<sub>31</sub>N<sub>2</sub>O<sub>7</sub> requires 471.2126).

Compound (–)-**8b**. A solution of (–)-**8c** (100 mg, 201  $\mu$ mol) in MeOH (3 mL) was treated with MeONa (186  $\mu$ L, 1.0 mmol, 5.4 M in MeOH) at room temperature. The mixture was heated at 60 °C for 24 h. Upon cooling to room temperature, dry toluene (10 mL) and TMSCH<sub>2</sub>N<sub>2</sub> (101  $\mu$ L, 201  $\mu$ mol, 2 M in hexanes) were added. After stirring for 30 min, the solvent was removed under vacuum. Flash chromatography (SiO<sub>2</sub>, 40–100% EtOAc/hexanes gradient) gave (–)-**8b** (93 mg, 98%) as an off-white foam:  $[\alpha]_{\text{D}}^{28}$  –77 (*c* 1.0, CHCl<sub>3</sub>); <sup>1</sup>H NMR (600 MHz, CDCl<sub>3</sub>)  $\delta$  6.72 (d, *J* = 8.4 Hz, 1H), 6.19 (dd, *J* = 8.4, 2.4 Hz, 1H), 6.06 (d, *J* = 2.4 Hz, 1H), 3.99 (s, 1H), 3.96–3.89 (m, 2H), 3.84 (s, 3H), 3.77 (s, 3H), 3.64 (s, 3H), 3.55 (s, 1H), 2.89 (s, 3H), 2.45 (dt, *J* = 12.6, 10.5 Hz, 1H), 2.38 (dd, *J* = 17.4, 5.4 Hz, 1H), 2.31 (td, *J* = 12.6, 5.4 Hz, 1H), 2.22 (ddd, *J* = 17.7, 12.9, 5.4 Hz, 1H), 2.16 (m, 1H), 1.45 (dd, *J* = 13.2, 5.4 Hz, 1H), 1.01 (dq, *J* = 14.4, 7.2 Hz, 1H), 0.72 (t, *J* = 7.2 Hz, 3H), 0.65 (dq, *J* = 14.4, 7.2 Hz, 1H); <sup>13</sup>C NMR (150 MHz, CDCl<sub>3</sub>)  $\delta$  171.1, 170.8, 169.8, 161.6, 154.4, 123.9, 120.7, 105.1, 103.2, 94.7, 87.2, 83.6, 64.3, 55.4, 54.4, 52.6, 51.8, 48.1, 46.8, 37.5, 35.5, 28.5, 24.6, 23.3, 8.9; IR (neat)  $\nu_{\max}$  2954, 1763, 1732, 1663, 1618, 1500, 1435, 1399, 1376, 1334, 1249, 1199, 1172, 1123, 1096, 1059, 1029, 936, 910, 890, 818, 728 cm<sup>-1</sup>; ESI-TOF HRMS  $m/z$  471.2125 (M+H<sup>+</sup>, C<sub>25</sub>H<sub>31</sub>N<sub>2</sub>O<sub>7</sub> requires 471.2126). The structure and the absolute configuration of (–)-**8b** were unambiguously established with a single crystal X-ray structure determination conducted on a colorless prism crystal obtained from vapor diffusion of hexane into a EtOAc solution of (–)-**8b** (CCDC 1475228).

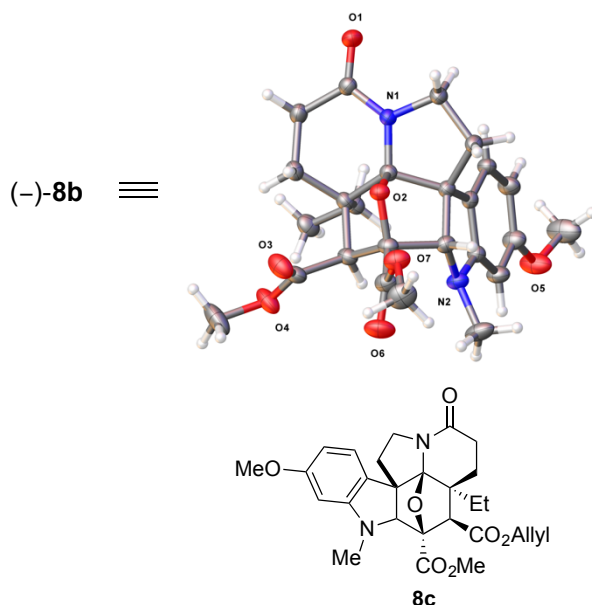

**Compound 8c**. Ar was bubbled through a mixture of **7c** (38 mg, 0.072 mmol) in triisopropylbenzene (145 mL). The vessel was sealed and heated at 230 °C for 24 h. Upon cooling to room temperature, the reaction mixture was filtered through a plug of silica gel which was washed thoroughly with hexanes before products were eluted with

10% MeOH/CH<sub>2</sub>Cl<sub>2</sub>. The solvent was evaporated under reduced pressure. Flash chromatography (SiO<sub>2</sub>, 40–70% EtOAc/hexanes gradient) provided **8c** (17.4 mg, 48%) as a pale yellow foam. Chiral HPLC (chiralcel OD, 60:40 *i*-PrOH/hexanes, 7 mL/min) allowed for separation of the enantiomers of **8c**: *t*<sub>R</sub> (natural) = 15.4 min, *t*<sub>R</sub> (unnatural) = 31.9 min. The scale for enantiomer separation was up to 500 mg per injection. For (+)-**8c**: [α]<sub>D</sub><sup>23</sup> +96 (*c* 0.36, CHCl<sub>3</sub>); <sup>1</sup>H NMR (600 MHz, CDCl<sub>3</sub>) δ 6.72 (d, *J* = 7.8 Hz, 1H), 6.19 (dd, *J* = 8.1, 2.1 Hz, 1H), 6.07 (d, *J* = 2.4 Hz, 1H), 5.86 (ddt, *J* = 16.8, 10.5, 6.2 Hz, 1H), 5.33–5.29 (m, 1H), 5.25–5.23 (m, 1H), 4.56 (dd, *J* = 12.5, 6.1 Hz, 1H), 4.51 (dd, *J* = 12.5, 6.1 Hz, 1H), 4.00 (s, 1H), 3.96–3.91 (m, 2H), 3.83 (s, 3H), 3.78 (s, 3H), 3.56 (s, 1H), 2.89 (s, 3H), 2.46 (m, 1H), 2.41–2.31 (m, 2H), 2.25–2.20 (m, 1H), 2.22 (ddd, *J* = 17.4, 12.6, 5.4 Hz, 1H), 2.16 (ddd, *J* = 12.6, 7.2, 1.8 Hz, 1H), 1.48 (dd, *J* = 13.2, 5.4 Hz, 1H), 1.01 (p, *J* = 7.2 Hz, 1H), 0.73 (t, *J* = 7.2 Hz, 3H), 0.66 (p, *J* = 7.2 Hz, 1H); <sup>13</sup>C NMR (150 MHz, CDCl<sub>3</sub>) δ 170.7, 170.3, 169.8, 161.6, 154.4, 131.4, 123.9, 120.8, 119.5, 105.2, 103.3, 94.8, 87.2, 83.7, 65.9, 64.3, 55.4, 54.5, 52.6, 48.2, 46.8, 37.5, 35.5, 28.6, 24.6, 23.3, 8.9; IR (neat) *v*<sub>max</sub> 2955, 1762, 1731, 1663, 1618, 1499, 1436, 1399, 1375, 1329, 1247, 1171, 1122, 1096, 1059, 1027, 910, 814, 729, 645, 598, 551 cm<sup>-1</sup>; ESI-TOF HRMS *m/z* 497.2273 (M+H<sup>+</sup>, C<sub>27</sub>H<sub>33</sub>N<sub>2</sub>O<sub>7</sub> requires 497.2282).

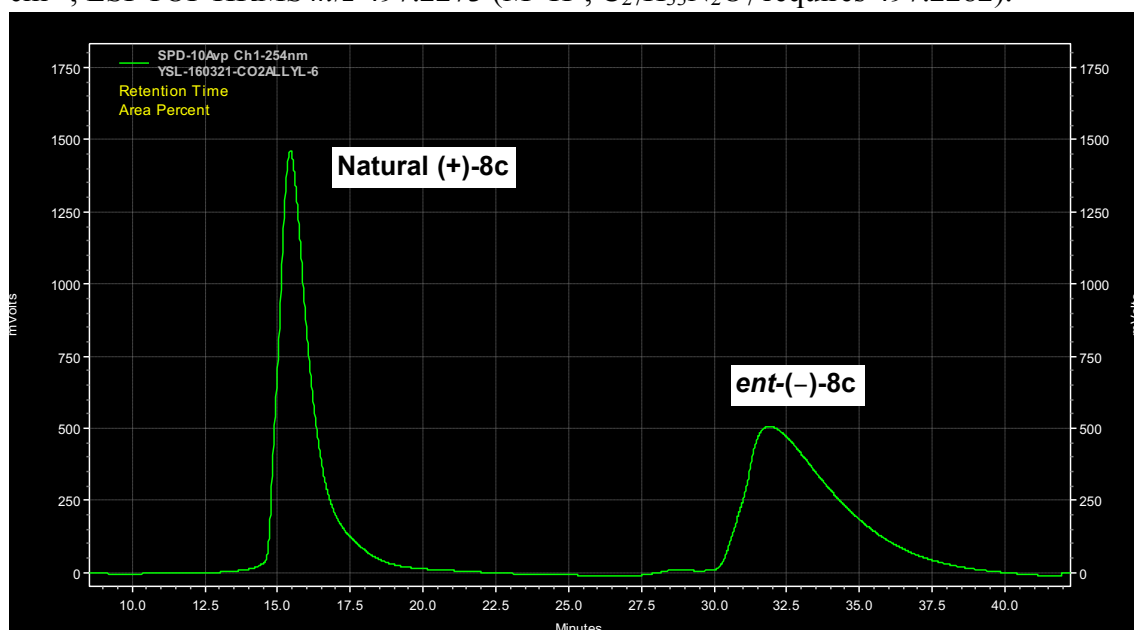

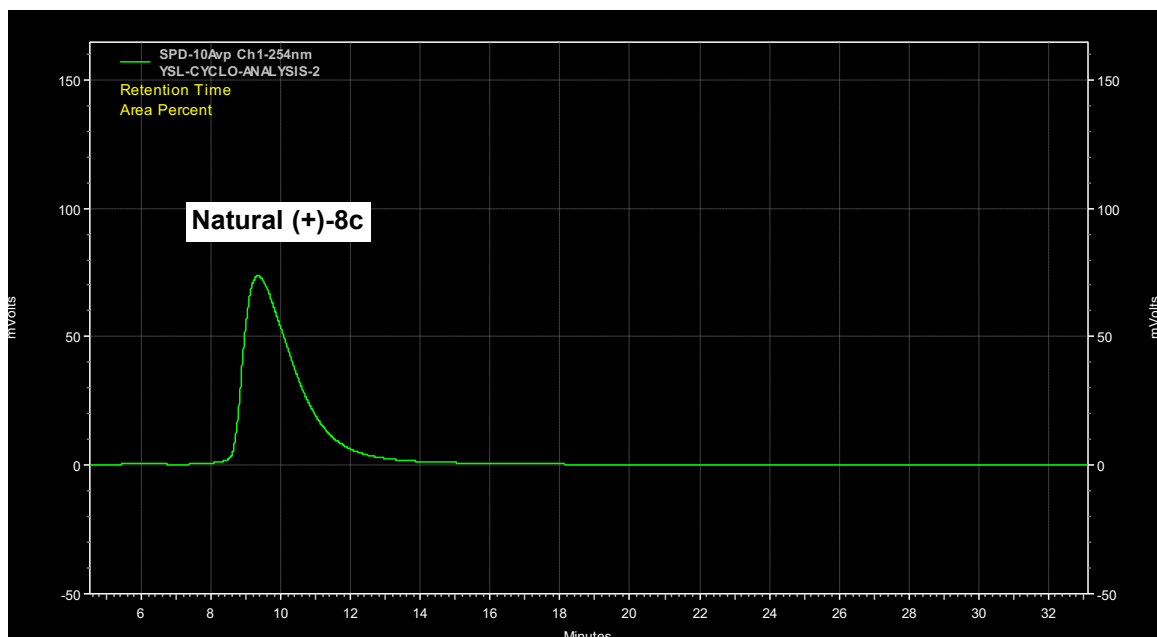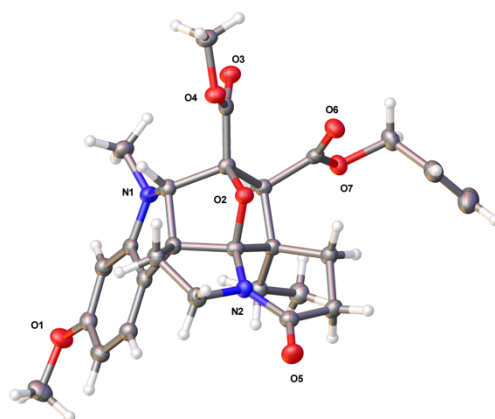

The structure and the relative stereochemistry of **8c** were unambiguously established with a single crystal X-ray structure determination conducted on a colorless prism crystal obtained from 60% *i*-PrOH/hexanes (CCDC 1475225). The absolute stereochemistry of (–)-**8c** was assigned by correlation with (–)-**8b** (CCDC 1475228) through conversion to (–)-**8b** (NaOMe, MeOH, 60 °C, 24 h; TMSCH<sub>2</sub>N<sub>2</sub>, MeOH/toluene, rt, 30 min, 98%).

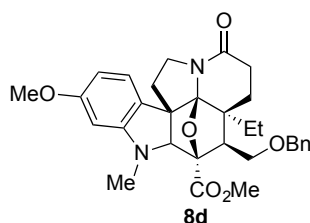

**Compound 8d.** Ar was bubbled through a mixture of **7d** (154 mg, 0.275 mmol) in triisopropylbenzene (137 mL). The vessel was sealed and heated at 230 °C for 24 h. Upon cooling to room temperature, the reaction mixture was filtered through a plug of silica gel which was washed thoroughly with hexanes before products were eluted with

10% MeOH/CH<sub>2</sub>Cl<sub>2</sub>. The solvent was evaporated under reduced pressure. Flash chromatography (SiO<sub>2</sub>, 15–50% Et<sub>2</sub>O/CH<sub>2</sub>Cl<sub>2</sub> gradient) provided **8d** (64 mg, 44%) as a pale yellow foam: <sup>1</sup>H NMR (500 MHz, CDCl<sub>3</sub>) δ 7.34–7.31 (m, 2H), 7.28–7.26 (m, 3H), 6.70 (dd, *J* = 8.1, 1.7 Hz, 1H), 6.18 (d, *J* = 8.2 Hz, 1H), 6.06 (d, *J* = 2.0 Hz, 1H), 4.40, (s, 2H), 4.11 (s, 1H), 3.98–3.86 (m, 2H), 3.79 (s, 3H), 3.69 (s, 3H), 3.64–3.58 (m, 2H), 3.02 (s, 3H), 2.83 (dd, *J* = 7.7, 5.7 Hz, 1H), 2.44–2.35 (m, 3H), 2.29–2.24 (m, 1H), 2.16 (ddd, *J* = 12.5, 7.8, 1.5 Hz, 1H), 1.70 (dd, *J* = 12.3, 5.5 Hz, 1H), 1.02–0.94 (m, 1H), 0.65 (t, *J* = 7.3 Hz, 3H), 0.66–0.55 (m, 1H); <sup>13</sup>C NMR (150 MHz, CDCl<sub>3</sub>) δ 170.6, 170.4, 161.7, 154.9, 137.9, 128.5, 127.7, 127.3, 123.9, 121.4, 105.4, 102.7, 94.5, 88.5, 83.1, 73.2, 67.8, 64.5, 55.5, 52.5, 48.3, 46.8, 46.3, 37.7, 35.1, 28.7, 24.2, 21.8, 9.6; IR (neat)  $\nu_{\max}$  2953, 1737, 1661, 1616, 1500, 1369, 1091, 1054, 1027 cm<sup>-1</sup>; ESI-TOF HRMS *m/z* 533.2653 (M+H<sup>+</sup>, C<sub>31</sub>H<sub>36</sub>N<sub>2</sub>O<sub>6</sub> requires 533.2646).

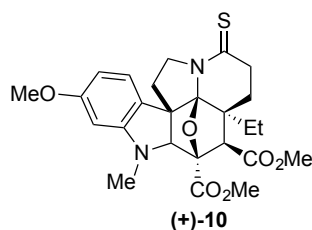

**Compound (+)-10.** A mixture of **8b** (9.3 mg, 19.8 μmol) and Lawesson's reagent (8 mg, 19.8 μmol) in toluene (0.99 mL) was heated at 110 °C for 1 h. The volatiles were removed under a stream of N<sub>2</sub> and the crude material purified by flash chromatography (SiO<sub>2</sub>, 40% EtOAc/hexanes) to give **10** (9.3 mg, 96%) as a yellow solid. Chiral HPLC (chiralcel OD, 60:40 *i*-PrOH/hexanes, 7 mL/min) allowed for separation of the enantiomers of **10** (*t<sub>R</sub>* [natural] = 17.2 min, *t<sub>R</sub>* [unnatural] = 39.9 min). The scale for enantiomer separation was more than 500 mg per injection. For (+)-**10**: [α]<sub>D</sub><sup>25</sup> +226 (*c* 0.42, CHCl<sub>3</sub>); <sup>1</sup>H NMR (600 MHz, CDCl<sub>3</sub>) δ 6.74 (d, *J* = 8.0 Hz, 1H), 6.20 (dd, *J* = 8.0, 2.0 Hz, 1H), 6.08 (d, *J* = 2.0 Hz, 1H), 4.32–4.26 (m, 1H), 4.21 (dd, *J* = 13.5, 9.9 Hz, 1H), 4.03 (s, 1H), 3.85 (s, 3H), 3.78 (s, 3H), 3.65 (s, 3H), 3.59 (s, 1H), 3.08 (dd, *J* = 19.8, 4.8 Hz, 1H), 2.89 (s, 3H), 2.72 (ddd, *J* = 19.5, 13.2, 6.0 Hz, 1H), 2.52 (app. q, *J* = 11.2 Hz, 1H), 2.24 (m, 2H), 1.40 (dd, *J* = 13.5, 5.7 Hz, 1H), 0.99 (dq, *J* = 14.1, 6.7 Hz, 1H), 0.71 (t, *J* = 6.7 Hz, 3H), 0.68 (m, 1H); <sup>13</sup>C NMR (150 MHz, CDCl<sub>3</sub>) δ 201.7, 170.8, 170.4, 161.7, 154.5, 123.9, 120.2, 103.4, 102.7, 94.9, 87.7, 83.9, 65.0, 55.4, 54.5, 53.9, 52.7, 51.9, 48.4, 38.4, 37.0, 35.5, 24.5, 23.4, 8.8; IR (neat)  $\nu_{\max}$  2953, 1763, 1733, 1618, 1591, 1500, 1438, 1405, 1352, 1248, 1204, 1168, 1117, 1099, 1082, 1054, 1028, 912, 866, 798, 729, 645 cm<sup>-1</sup>; ESI-TOF HRMS *m/z* 487.1892 (M+H<sup>+</sup>, C<sub>25</sub>H<sub>31</sub>N<sub>2</sub>O<sub>6</sub>S requires 487.1897).

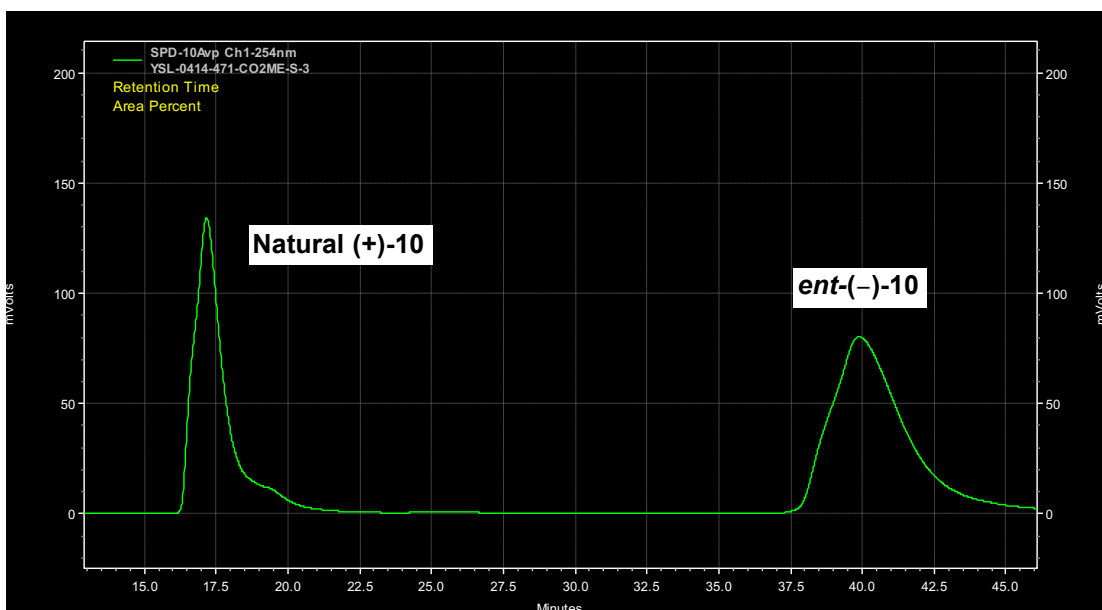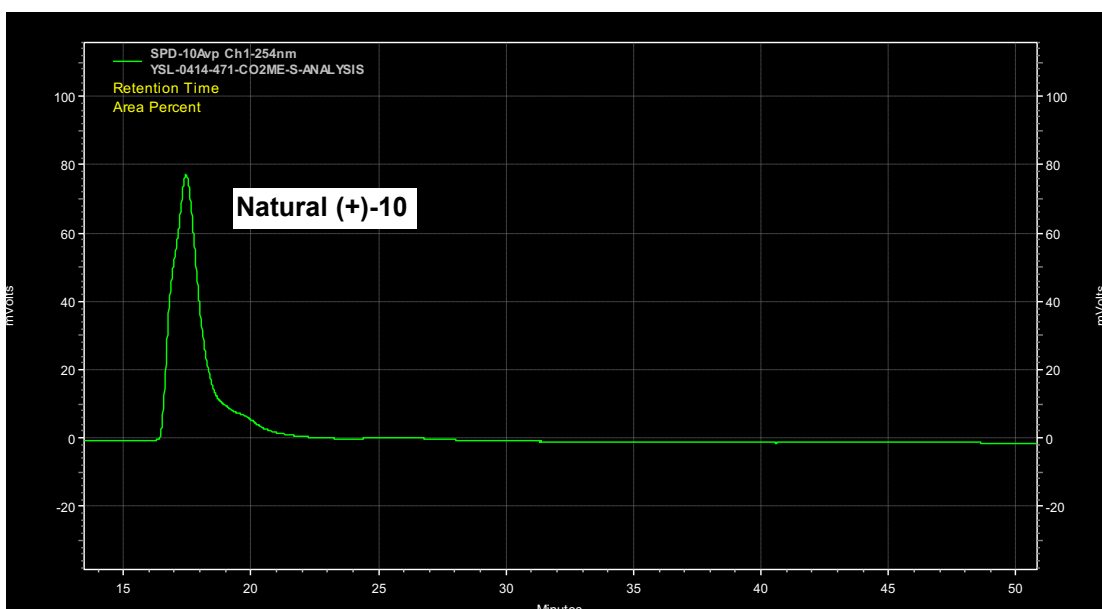

The absolute stereochemistry of (–)-**10** was assigned by conversion of (–)-**8b** to (–)-**10** through thionation (Lawesson’s reagent, toluene, 110 °C, 1 h, 95%). For (–)-**10**:  $[\alpha]_D^{26}$  –230 (*c* 1.0, CHCl<sub>3</sub>); <sup>1</sup>H NMR (600 MHz, CDCl<sub>3</sub>) δ 6.74 (d, *J* = 8.0 Hz, 1H), 6.20 (dd, *J* = 8.0, 2.0 Hz, 1H), 6.08 (d, *J* = 2.0 Hz, 1H), 4.32–4.26 (m, 1H), 4.21 (dd, *J* = 13.5, 9.9 Hz, 1H), 4.03 (s, 1H), 3.85 (s, 3H), 3.78 (s, 3H), 3.65 (s, 3H), 3.59 (s, 1H), 3.08 (dd, *J* = 19.8, 4.8 Hz 1H), 2.89 (s, 3H), 2.72 (ddd, *J* = 19.5, 13.2, 6.0 Hz, 1H), 2.52 (app. q, *J* = 11.2 Hz, 1H), 2.24 (m, 2H), 1.40 (dd, *J* = 13.5, 5.7 Hz, 1H), 0.99 (dq, *J* = 14.1, 6.7 Hz, 1H), 0.71 (t, *J* = 6.7 Hz, 3H), 0.68 (m, 1H); <sup>13</sup>C NMR (150 MHz, CDCl<sub>3</sub>) δ 201.7, 170.8, 170.4, 161.7, 154.5, 123.9, 120.2, 103.4, 102.7, 94.9, 87.7, 83.9, 65.0, 55.4, 54.5, 53.9, 52.7, 51.9, 48.4, 38.4, 37.0, 35.5, 24.5, 23.4, 8.8; IR (neat)  $\nu_{\max}$  2953, 1763, 1733, 1618, 1591, 1500, 1438, 1405, 1352, 1248, 1204, 1168, 1117, 1099, 1082, 1054, 1028, 912, 866, 798, 729, 645 cm<sup>-1</sup>; ESI-TOF HRMS *m/z* 487.1892 (M+H<sup>+</sup>, C<sub>25</sub>H<sub>31</sub>N<sub>2</sub>O<sub>6</sub>S requires 487.1897).



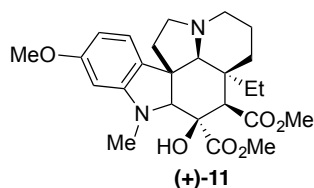

**Compound (+)-11.** Thioamide (+)-10 (20 mg, 41.1  $\mu\text{mol}$ ) was passed as a solution in 9:1 THF/MeOH through a short (ca. 1 cm) plug of Raney-Nickel in a Monsterpette. The eluent was concentrated to dryness under a stream of  $\text{N}_2$  and then re-dissolved in anhydrous MeOH (0.82 mL) under Ar and cooled to 0  $^\circ\text{C}$ .  $\text{NaBH}_4$  (15.5 mg, 0.411 mmol) was added. After 5 min, the mixture was warmed to room temperature and stirred for another 1 h. 0.1 N HCl (ca. 3 mL) was added, then the mixture was neutralized with the addition of saturated aqueous  $\text{NaHCO}_3$  (ca. 5 mL) and extracted with EtOAc ( $3 \times 2$  mL). The combined organic extracts were washed with saturated aqueous NaCl, dried ( $\text{Na}_2\text{SO}_4$ ) and concentrated under reduced pressure. PTLC ( $\text{SiO}_2$ , 90:10:3 EtOAc/hexanes/ $\text{Et}_3\text{N}$ ) gave (+)-11 (13.7 mg, 73%) as a clear, colorless oil:  $[\alpha]_{\text{D}}^{24} +66$  ( $c$  0.89,  $\text{CHCl}_3$ );  $^1\text{H NMR}$  (600 MHz,  $\text{CDCl}_3$ )  $\delta$  10.09 (br s, 1H), 6.86 (d,  $J = 8.0$  Hz, 1H), 6.25 (dd,  $J = 8.0, 2.0$  Hz, 1H), 6.00 (d,  $J = 2.0$  Hz, 1H), 3.77 (s, 3H), 3.73 (s, 3H), 3.65 (s, 3H), 3.61 (s, 1H), 3.35 (s, 1H), 3.20–3.15 (m, 1H), 3.04 (m, 1H), 2.58 (s, 3H), 2.39–2.30 (m, 2H), 2.28–2.22 (m, 1H), 2.16 (s, 1H), 1.99–1.89 (m, 2H), 1.50–1.47 (m, 2H), 1.39 (dq,  $J = 14.4, 7.2$  Hz, 1H), 1.26–1.21 (m, 1H), 0.85 (dq,  $J = 14.4, 7.2$  Hz, 1H), 0.59 (t,  $J = 7.2$  Hz, 3H);  $^{13}\text{C NMR}$  (150 MHz,  $\text{CDCl}_3$ )  $\delta$  174.1, 173.0, 160.9, 154.1, 126.3, 122.9, 104.2, 95.7, 83.9, 78.2, 71.4, 55.3, 53.3, 52.3, 52.1, 51.5, 51.1, 51.0, 44.2, 38.23, 38.16, 36.6, 31.3, 21.8, 8.2; IR (neat)  $\nu_{\text{max}}$  2946, 1733, 1615, 1501, 1452, 1434, 1355, 1331, 1246, 1226, 1167, 1088, 1042, 972, 907, 799, 750, 665  $\text{cm}^{-1}$ ; ESI-TOF HRMS  $m/z$  459.2486 ( $\text{M}+\text{H}^+$ ,  $\text{C}_{25}\text{H}_{31}\text{N}_2\text{O}_6\text{S}$  requires 459.2490).

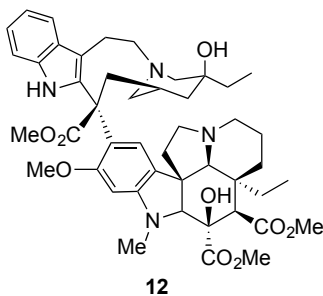

**Compound 12.** (+)-11 (6 mg, 13.1  $\mu\text{mol}$ ) and catharanthine sulfate (5 mg, 6.54  $\mu\text{mol}$ ) were combined with TFE (60  $\mu\text{L}$ ), aqueous 0.1 N HCl (0.30 mL) and water (0.30 mL) in a 2-dram vial. The vial was stoppered and flushed with Ar.  $\text{FeCl}_3 \cdot 6\text{H}_2\text{O}$  (17.7 mg, 65.5  $\mu\text{mol}$ ) was added producing a bright yellow precipitate. The mixture was stirred for 2 h during which time the precipitate re-dissolved leaving a clear, yellow solution. Meanwhile, a suspension of  $\text{Fe}_2(\text{ox})_3 \cdot 6\text{H}_2\text{O}$  (63.4 mg, 131  $\mu\text{mol}$ ) in water (54.6 mL) was stirred for 2 h, by which time the  $\text{Fe}_2(\text{ox})_3 \cdot 6\text{H}_2\text{O}$  was completely dissolved. This mixture was cooled to 0  $^\circ\text{C}$  and air was bubbled vigorously through the solution for 15–20 min. The  $\text{FeCl}_3$  coupling mixture was transferred to the  $\text{Fe}_2(\text{ox})_3/\text{O}_2$  solution by pipette, then  $\text{NaBH}_4$  (9.9 mg, 262  $\mu\text{mol}$ ) was added as a solution in water (1 mL). After stirring for 30 min, the reaction was quenched by the addition of aqueous  $\text{NH}_4\text{OH}$  (16

mL) and the resulting mixture extracted with 10% MeOH/CH<sub>2</sub>Cl<sub>2</sub> (4×50 mL). The combined organic extracts were dried (Na<sub>2</sub>SO<sub>4</sub>) and concentrated under reduced pressure. PTLC (SiO<sub>2</sub>, 97:3:3 EtOAc/MeOH/Et<sub>3</sub>N) gave **12** (3.9 mg, 37%) as an off-white film, along with the corresponding leurosidine analogue (2.2 mg, 21%) and anhydrovinblastine analogue (1.7 mg, 16%) also as off-white films. For **12**: [ $\alpha$ ]<sub>D</sub><sup>25</sup> +74 (*c* 0.27, CHCl<sub>3</sub>); <sup>1</sup>H NMR (600 MHz, CDCl<sub>3</sub>)  $\delta$  10.39 (br s, 1H), 8.06 (br s, 1H), 7.48 (d, *J* = 7.8 Hz, 1H), 7.19 (t, *J* = 7.5 Hz, 1H), 7.11 (m, 2H), 6.47 (br s, 1H), 6.04 (s, 1H), 3.90 (t, *J* = 14.1 Hz, 1H), 3.79 (s, 3H), 3.75 (s, 3H), 3.69 (s, 3H), 3.72–3.65 (m, 1H), 3.58 (s, 3H), 3.65–3.50 (m, 2H), 3.29 (s, 1H), 3.20 (br m, 1H), 3.03 (m, 1H), 2.92 (d, *J* = 8.4 Hz, 2H), 2.31 (m, 2H), 2.20 (s, 1H), 2.18–2.13 (m, 2H), 1.98–1.90 (m, 3H), 1.80 (t, *J* = 12.0 Hz, 1H), 1.68 (dq, *J* = 14.4, 7.2 Hz, 1H), 1.55–1.30 (m, 7H), 1.09 (dq, *J* = 13.2, 7.2 Hz, 1H), 0.92 (t, *J* = 6.6 Hz, 3H), 0.88 (t, *J* = 7.5 Hz, 3H); <sup>13</sup>C NMR (150 MHz, CDCl<sub>3</sub>)  $\delta$  174.1, 173.0, 157.8, 153.2, 134.9, 131.1, 129.0, 124.2, 123.6, 122.8, 119.3, 118.3, 110.2, 94.0, 84.0, 77.9, 68.4, 55.9, 55.8, 53.8, 52.5, 52.4, 52.1, 51.2, 50.8, 50.7, 44.6, 38.32, 38.23, 35.6, 34.5, 30.5, 21.6, 9.2, 6.8; IR (neat)  $\nu_{\max}$  2948, 1735, 1617, 1503, 1434, 1362, 1332, 1301, 1227, 1174, 1042, 1004 cm<sup>-1</sup>; ESI-TOF HRMS *m/z* 813.4418 (M+H<sup>+</sup>, C<sub>46</sub>H<sub>61</sub>N<sub>4</sub>O<sub>9</sub> requires 813.4433).

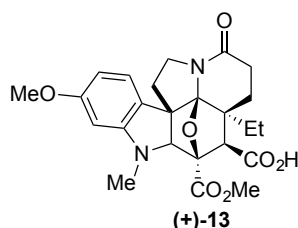

**Compound (+)-13.** Morpholine (44.6 mg, 0.51 mmol) and Pd(PPh<sub>3</sub>)<sub>4</sub> (5.9 mg, 5.12  $\mu$ mol) were added to a mixture of (+)-**8c** (25.4 mg, 51.2  $\mu$ mol) in THF (0.93 mL) and DMSO (90  $\mu$ L). After stirring for 1 h, the mixture was diluted with EtOAc (3 mL) and washed with aqueous 2 N HCl (3  $\times$  1 mL), then saturated aqueous NaCl. The combined aqueous layers were re-extracted with EtOAc and the combined EtOAc extracts were dried (Na<sub>2</sub>SO<sub>4</sub>) and concentrated. PTLC (SiO<sub>2</sub>, 1% AcOH/EtOAc) gave (+)-**13** (18.5 mg, 79%) as a clear, colorless oil: [ $\alpha$ ]<sub>D</sub><sup>26</sup> +86 (*c* 0.41, CHCl<sub>3</sub>); <sup>1</sup>H NMR (600 MHz, CDCl<sub>3</sub>)  $\delta$  6.72 (d, *J* = 8.3 Hz, 1H), 6.20 (dd, *J* = 8.3, 2.3 Hz, 1H), 6.07 (d, *J* = 2.3 Hz, 1H), 3.99 (s, 1H), 3.97–3.88 (m, 2H), 3.81 (s, 3H), 3.77 (s, 3H), 3.56 (s, 1H), 2.89 (s, 3H), 2.48–2.32 (m, 3H), 2.25 (ddd, *J* = 17.4, 12.6, 5.4 Hz, 1H), 2.17 (m, 1H), 1.61 (dd, *J* = 12.9, 5.7 Hz, 1H), 1.01 (dq, *J* = 14.4, 7.2 Hz, 1H), 0.74 (t, *J* = 7.2 Hz, 3H), 0.66 (dq, *J* = 14.4, 7.2 Hz, 1H); <sup>13</sup>C NMR (150 MHz, CDCl<sub>3</sub>)  $\delta$  175.0, 170.6, 170.3, 161.6, 154.4, 123.9, 120.6, 105.0, 103.4, 94.8, 87.2, 83.7, 64.4, 55.4, 54.2, 52.6, 48.1, 46.8, 37.4, 35.6, 28.4, 24.6, 23.2, 8.9; IR (neat)  $\nu_{\max}$  3372, 2955, 1760, 1724, 1619, 1461, 1438, 1406, 1371, 1329, 1247, 1200, 1173, 1125, 1098, 1060, 1027, 968, 938, 896, 823 cm<sup>-1</sup>; ESI-TOF HRMS *m/z* 457.1976 (M+H<sup>+</sup>, C<sub>24</sub>H<sub>28</sub>N<sub>2</sub>O<sub>7</sub> requires 457.1969).

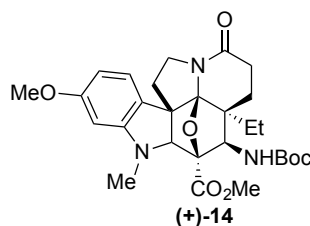

**Compound (+)-14.** Et<sub>3</sub>N (4.9 mg, 48.2 μmol) and DPPA (12.1 mg, 43.8 μmol) were added to a mixture of (+)-13 (10 mg, 21.9 μmol) in *t*-BuOH (2.2 mL, distilled from CaH<sub>2</sub> and stored over 4Å MS). The resulting mixture was heated at 85 °C for 16 h. Upon cooling to room temperature, the volatiles were evaporated under a stream of N<sub>2</sub> and the residue partitioned between EtOAc and aqueous 2 N HCl. The aqueous layer was extracted twice with EtOAc, the combined organic extracts were washed with saturated aqueous NaHCO<sub>3</sub> and saturated aqueous NaCl then dried (Na<sub>2</sub>SO<sub>4</sub>) and concentrated under reduced pressure. PTLC (SiO<sub>2</sub>, 2% MeOH/EtOAc) gave (+)-14 (9.1 mg, 79%) as a white film:  $[\alpha]_D^{25} +72$  (*c* 0.85, CHCl<sub>3</sub>); <sup>1</sup>H NMR (600 MHz, CDCl<sub>3</sub>) δ 6.67 (d, *J* = 8.0 Hz, 1H), 6.14 (dd, *J* = 8.0, 1.9 Hz, 1H), 6.06 (d, *J* = 1.9 Hz, 1H), 4.71 (m, 2H), 4.09 (s, 1H), 3.93 (dt, *J* = 11.4, 8.4 Hz, 1H), 3.87 (app. t, *J* = 11.1 Hz, 1H), 3.82 (s, 3H), 3.76 (s, 3H), 3.02 (s, 3H), 2.44–2.35 (m, 2H), (2.27 (ddd, *J* = 18.6, 13.2, 5.4 Hz, 1H), 2.14 (dd, *J* = 12.3, 7.5 Hz, 1H), 2.03 (dt, *J* = 6.0, 5.7 Hz, 1H), 1.73 (dd, *J* = 13.2, 4.8 Hz, 1H), 1.37 (s, 9H), 0.92–0.87 (m, 1H), 0.61–0.56 (m, 4H); <sup>13</sup>C NMR (150 MHz, CDCl<sub>3</sub>) δ 169.7, 169.0, 161.6, 154.5, 154.3, 123.5, 120.3, 104.7, 103.2, 94.3, 91.2, 81.1, 79.9, 64.2, 58.6, 55.3, 52.4, 47.9, 46.8, 37.1, 35.2, 28.23, 28.18, 22.6, 21.9, 8.9; IR (neat)  $\nu_{\max}$  2972, 1744, 1712, 1662, 1618, 1501, 1459, 1434, 1400, 1366, 1320, 1245, 1201, 1165, 1122, 1095, 1054, 1032, 1008, 892, 872, 818, 730 cm<sup>-1</sup>; ESI-TOF HRMS *m/z* 528.2700 (M+H<sup>+</sup>, C<sub>28</sub>H<sub>37</sub>N<sub>3</sub>O<sub>7</sub> requires 528.2704).

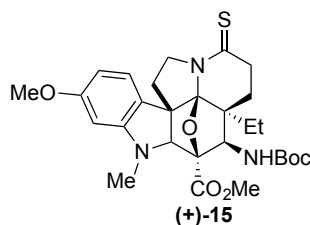

**Compound (+)-15.** A mixture of (+)-14 (22 mg, 41.7 μmol) and Lawesson's reagent (16.9 mg, 41.7 μmol) in toluene (2.1 mL) was heated at 110 °C for 1 h. The volatiles were removed under a stream of N<sub>2</sub> and the crude material purified directly by PTLC (SiO<sub>2</sub>, 40% EtOAc/hexanes) to give (+)-15 (18.8 mg, 83%) as a cloudy white film:  $[\alpha]_D^{23} +184$  (*c* 0.69, CHCl<sub>3</sub>); <sup>1</sup>H NMR (600 MHz, CDCl<sub>3</sub>) δ 6.70 (d, *J* = 8.3 Hz, 1H), 6.17 (dd, *J* = 8.3, 2.3 Hz, 1H), 6.08 (d, *J* = 2.3 Hz, 1H), 4.75 (d, *J* = 11.4 Hz, 1H), 4.71 (d, *J* = 11.4 Hz, 1H), 4.32–4.26 (m, 1H), 4.18 (dd, *J* = 13.8, 10.2 Hz, 1H), 4.13 (s, 1H), 3.83 (s, 3H), 3.77 (s, 3H), 3.13 (dd, *J* = 19.8, 4.2 Hz, 1H), 3.04 (s, 3H), 2.77 (ddd, *J* = 19.2, 13.2, 5.9 Hz, 1H), 2.46 (app. q, *J* = 11.2 Hz, 1H), 2.23 (dd, *J* = 12.6, 7.2 Hz, 1H), 1.96 (dt, *J* = 12.9, 5.2 Hz, 1H), 1.69 (dd, *J* = 13.2, 4.2 Hz, 1H), 1.38 (s, 9H), 0.91–0.86 (m, 1H), 0.62–0.57 (m, 4H); <sup>13</sup>C NMR (150 MHz, CDCl<sub>3</sub>) δ 201.5, 168.7, 161.8, 154.6, 154.3, 123.6, 119.7, 103.4, 102.4, 94.5, 91.8, 81.3, 80.1, 64.9, 58.5, 55.4, 53.9, 52.5, 48.3, 38.1, 36.7, 35.2, 28.3, 22.6, 22.0, 9.0; IR (neat)  $\nu_{\max}$  2974, 1745, 1702, 1618, 1592,

1501, 1440, 1405, 1365, 1350, 1321, 1298, 1246, 1206, 1160, 1111, 1077, 1051, 1007, 983, 968, 956, 913, 875, 831, 729  $\text{cm}^{-1}$ ; ESI-TOF HRMS  $m/z$  544.2480 ( $\text{M}+\text{H}^+$ ,  $\text{C}_{28}\text{H}_{38}\text{N}_3\text{O}_6\text{S}$  requires 544.2476).

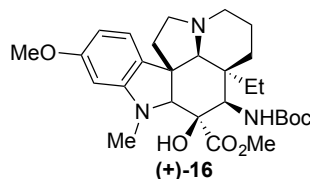

**Compound (+)-16.** (+)-15 (10.8 mg, 19.9  $\mu\text{mol}$ ) was filtered through a 1 cm plug of Raney-Nickel in a Monsterpette as a solution in 1:1 THF/MeOH. The solvent was evaporated under a stream of  $\text{N}_2$  and the residue dissolved in anhydrous MeOH (0.4 mL) and cooled to 0  $^\circ\text{C}$ .  $\text{NaBH}_4$  (7.5 mg, 0.199 mmol) was added and the resulting mixture was stirred at 0  $^\circ\text{C}$  for 1 h. Saturated aqueous  $\text{NH}_4\text{Cl}$  (ca. 3 mL) was added and the mixture extracted with EtOAc ( $3 \times$  ca. 1 mL). The combined organic extracts were washed with saturated aqueous NaCl, dried ( $\text{Na}_2\text{SO}_4$ ) and concentrated under a stream of  $\text{N}_2$ . PTLC ( $\text{SiO}_2$ , 3%  $\text{Et}_3\text{N}/\text{EtOAc}$ ) gave (+)-16 (3.8 mg, 37%) as a colorless film:  $[\alpha]_D^{25} +31$  ( $c$  0.39,  $\text{CHCl}_3$ );  $^1\text{H}$  NMR (600 MHz,  $\text{CDCl}_3$ )  $\delta$  9.76 (br s, 1H), 6.86 (d,  $J = 8.0$  Hz, 1H), 6.27 (dd,  $J = 8.0, 2.3$  Hz, 1H), 6.01 (d,  $J = 2.3$  Hz, 1H), 5.28 (d,  $J = 9.6$  Hz, 1H), 4.36 (d,  $J = 9.6$  Hz, 1H), 3.77 (s, 3H), 3.74 (s, 3H), 3.59 (s, 1H), 3.16 (m, 1H), 3.05 (m, 1H), 2.59 (s, 3H), 2.35–2.26 (m, 3H), 2.06 (s, 1H), 1.94 (dt,  $J = 11.1, 3.8$  Hz, 1H), 1.67–1.58 (m, 3H), 1.40–1.34 (m, 10H), 1.07 (dt,  $J = 13.2, 5.2$  Hz, 1H), 0.98 (dq,  $J = 14.1, 7.2$  Hz, 1H), 0.53 (t,  $J = 7.2$  Hz, 3H); With minor (~15%) NHBoc rotamer peaks observed at:  $\delta$  6.09 (d,  $J = 2.2$  Hz, 1H), 5.12 (d,  $J = 9.5$  Hz, 1H), 4.25 (d,  $J = 9.4$  Hz, 1H), 3.80 (s, 3H), 3.77 (s, 3H), 3.60 (s, 1H), 2.62 (s, 3H), 2.06 (s, 1H), 1.49 (s, 9H), 0.47 (t,  $J = 7.4$  Hz, 3H).  $^{13}\text{C}$  NMR (150 MHz,  $\text{CDCl}_3$ )  $\delta$  173.3, 160.9, 155.9, 154.6, 126.8, 123.0, 104.3, 96.0, 83.9, 79.5, 78.7, 73.6, 55.4, 55.2, 53.0, 52.6, 52.4, 52.0, 44.2, 40.2, 38.8, 34.9, 30.2, 28.4, 23.5, 8.08; With minor (~15%) NHBoc rotamer peaks observed at:  $\delta$  172.8, 160.9, 156.0, 154.6, 127.0, 123.1, 104.4, 104.3, 96.4, 83.8, 79.9, 79.2, 72.9, 56.6, 55.4, 53.2, 52.4, 52.2, 44.3, 39.0, 34.2, 30.1, 29.7, 28.5, 23.5, 8.3. IR (neat)  $\nu_{\text{max}}$  2931, 1741, 1716, 1615, 1495, 1390, 1364, 1323, 1302, 1227, 1169, 1114, 1088, 1063, 1040, 1000, 969, 889, 821, 797, 734, 669, 648  $\text{cm}^{-1}$ ; ESI-TOF HRMS  $m/z$  516.3074 ( $\text{M}+\text{H}^+$ ,  $\text{C}_{28}\text{H}_{41}\text{N}_3\text{O}_6$  requires 516.3068).

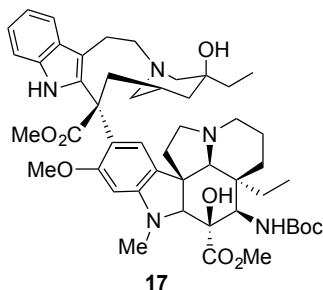

**Compound (+)-17.** (+)-16 (6.4 mg, 12.4  $\mu\text{mol}$ ) and catharanthine sulfate (4.8 mg, 6.21  $\mu\text{mol}$ ) were combined with TFE (57  $\mu\text{L}$ ), aqueous 0.1 N HCl (0.29 mL) and water (0.29 mL) in a 2-dram vial. The vial was fitted with a rubber septum and flushed with Ar.  $\text{FeCl}_3 \cdot 6\text{H}_2\text{O}$  (16.8 mg, 62.0  $\mu\text{mol}$ ) was added producing a bright yellow precipitate. The

mixture was stirred for 2 h during which time the precipitate re-dissolved leaving a clear, yellow solution. Meanwhile, a suspension of  $\text{Fe}_2(\text{ox})_3 \cdot 6\text{H}_2\text{O}$  (60 mg, 124  $\mu\text{mol}$ ) in water (52 mL) was stirred for 2 h, by which time the  $\text{Fe}_2(\text{ox})_3 \cdot 6\text{H}_2\text{O}$  was completely dissolved. This mixture was cooled to 0 °C and air was bubbled vigorously through the solution for 15–20 min. The  $\text{FeCl}_3$  coupling mixture was transferred to the  $\text{Fe}_2(\text{ox})_3/\text{O}_2$  solution by pipette, then  $\text{NaBH}_4$  (9.4 mg, 248  $\mu\text{mol}$ ) was added as a solution in water (1 mL). After stirring for 30 min, the reaction was quenched by the addition of aqueous  $\text{NH}_4\text{OH}$  (16 mL) and the resulting mixture extracted with 10%  $\text{MeOH}/\text{CH}_2\text{Cl}_2$  ( $4 \times 50$  mL). The combined organic extracts were dried ( $\text{Na}_2\text{SO}_4$ ) and concentrated under reduced pressure. PTLC ( $\text{SiO}_2$ , 97:3:3  $\text{EtOAc}/\text{MeOH}/\text{Et}_3\text{N}$ ) gave (+)-**17** (3.3 mg, 31%) as a white film, along with the corresponding leurosidine analogue (2.2 mg, 20%) and anhydrovinblastine analogue (1.1 mg, 10%) also as white films. For (+)-**17**:  $[\alpha]_{\text{D}}^{26} +36$  ( $c$  0.21,  $\text{CHCl}_3$ );  $^1\text{H NMR}$  (600 MHz,  $\text{CDCl}_3$ )  $\delta$  10.0 (br s, 1H), 8.04 (br s, 1H), 7.50 (d,  $J = 7.8$  Hz, 1H), 7.17 (t,  $J = 7.5$  Hz, 1H), 7.13–7.07 (m, 2H), 6.54 (br s, 1H), 6.04 (s, 1H), 5.27 (d,  $J = 9.6$  Hz, 1H), 4.33 (d,  $J = 9.6$  Hz, 1H), 3.91 (t,  $J = 14.1$  Hz, 1H), 3.78 (s, 3H), 3.78 (m, 1H), 3.75 (s, 3H), 3.60–3.55 (m, 5H), 3.45–3.25 (br m, 2H), 3.17–3.07 (br m, 2H), 3.01 (dt,  $J = 9.3, 3.7$  Hz, 1H), 2.93 (d,  $J = 10.2$  Hz, 1H), 2.81 (br s, 2H), 2.64 (s, 3H), 2.46–2.38 (br s, 1H), 2.28 (d,  $J = 14.4$  Hz, 1H), 2.21 (q,  $J = 9.3$  Hz, 1H), 2.16–2.10 (m, 1H), 2.08 (s, 1H), 1.90 (dt,  $J = 11.0, 4.0$  Hz, 1H), 1.84 (m, 1H), 1.77–1.55 (m, 7H), 1.41 (s, 9H), 1.35–1.28 (br m, 2H), 1.25–1.20 (m, 1H), 1.16 (dt,  $J = 13.4, 5.2$  Hz, 1H), 0.88 (t,  $J = 7.5$  Hz, 3H), 0.83 (t,  $J = 7.5$  Hz, 3H); With minor (~10%)  $\text{NHBoc}$  rotamer peaks observed at:  $\delta$  9.89 (s, 1H), 6.13 (s, 1H), 5.11 (d,  $J = 9.2$  Hz, 1H), 4.23 (d,  $J = 9.2$  Hz, 1H), 1.52 (s, 9H). IR (neat)  $\nu_{\text{max}}$  2944, 1720, 1616, 1495, 1459, 1434, 1391, 1365, 1332, 1305, 1227, 1171, 1111, 1092, 1061, 1011, 739  $\text{cm}^{-1}$ ; ESI-TOF HRMS  $m/z$  870.5009 ( $\text{M}+\text{H}^+$ ,  $\text{C}_{49}\text{H}_{68}\text{N}_5\text{O}_9$  requires 870.5011).

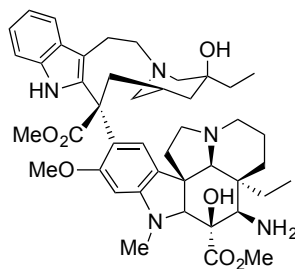

**18**

**Compound (+)-18.** (+)-**17** (1.2 mg, 1.38  $\mu\text{mol}$ ) was dissolved in 4:1  $\text{CH}_2\text{Cl}_2/\text{TFA}$  (280  $\mu\text{L}$ ) and the mixture was stirred for 2 h, then diluted with saturated aqueous  $\text{NaHCO}_3$  (3 mL). The mixture was extracted with 10%  $\text{MeOH}/\text{CH}_2\text{Cl}_2$  ( $3 \times 2$  mL). The combined organic extracts were dried ( $\text{Na}_2\text{SO}_4$ ) and concentrated under a stream of  $\text{N}_2$ . The reaction was repeated using 1.1 mg of (+)-**17** (2.3 mg total) and the combined crude products were purified by PTLC ( $\text{SiO}_2$ , 94:3:3  $\text{EtOAc}/\text{MeOH}/\text{Et}_3\text{N}$ ) to give (+)-**18** (1.23 mg, 60%) as a white film:  $[\alpha]_{\text{D}}^{26} +75$  ( $c$  0.10,  $\text{CHCl}_3$ );  $^1\text{H NMR}$  (600 MHz,  $\text{CDCl}_3$ )  $\delta$  9.84 (br s, 1H), 7.96 (br s, 1H), 7.50 (d,  $J = 7.8$  Hz, 1H), 7.18 (t,  $J = 6.9$  Hz, 1H), 7.13 (d,  $J = 7.8$  Hz, 1H), 7.10 (t,  $J = 7.5$  Hz, 1H), 6.52 (br s, 1H), 6.08 (s, 1H), 3.93 (t,  $J = 14.4$  Hz, 1H), 3.84 (s, 3H), 3.76 (s, 3H), 3.64 (s, 1H), 3.56 (s, 3H), 3.38 (s, 1H), 3.13 (br s, 1H), 3.05 (dt,  $J = 9.0, 3.2$  Hz, 1H), 2.94 (d,  $J = 10.8$  Hz, 1H), 2.81 (br s, 1H), 2.67

(s, 3H), 2.44 (d,  $J = 14.4$  Hz, 1H), 2.30–2.20 (m, 1H), 2.10 (d,  $J = 13.2, 8.6$  Hz, 1H), 2.04 (s, 1H), 1.99–1.94 (m, 1H), 1.78 (m, 1H), 1.70 (br s, 1H), 1.35–1.25 (m, 2H), 0.95–0.92 (m, 3H), 0.89–0.86 (m, 4H); IR (neat)  $\nu_{\max}$  3468, 2932, 1731, 1616, 1503, 1459, 1432, 1363, 1331, 1307, 1228, 1174, 1136, 1061, 1038, 1006, 908, 878, 856, 812, 732, 670  $\text{cm}^{-1}$ ; ESI-TOF HRMS  $m/z$  770.4468 ( $\text{M}+\text{H}^+$ ,  $\text{C}_{44}\text{H}_{60}\text{N}_5\text{O}_7$  requires 770.4487).

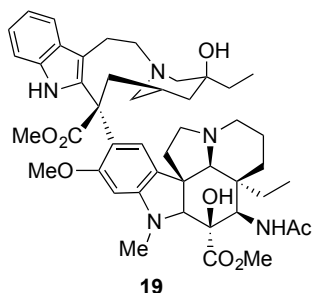

**Compound (+)-19.** (+)-**18** (0.9 mg, 1.17  $\mu\text{mol}$ ) was dissolved in 100  $\mu\text{L}$  of anhydrous pyridine under Ar. Acetic anhydride (100  $\mu\text{L}$ ) was added and the resulting mixture stirred for 30 min at which time volatiles were evaporated under a stream of  $\text{N}_2$ . The residue was re-dissolved in toluene/ $\text{CH}_2\text{Cl}_2$  and concentrated once more to give a mixture of mono- and diacetylated products. The residue was then dissolved in MeOH (0.2 mL) and  $\text{K}_2\text{CO}_3$  (1.62 mg, 11.7  $\mu\text{mol}$ , delivered in 44  $\mu\text{L}$   $\text{H}_2\text{O}$ ) was added. After stirring for 1 h, the mixture was diluted with water and saturated aqueous NaCl and then extracted with 10% MeOH/ $\text{CH}_2\text{Cl}_2$  ( $3 \times \text{ca.} 1$  mL) and with EtOAc ( $3 \times \text{ca.} 1$  mL). The combined organic extracts were washed with saturated aqueous NaCl. The combined aqueous layers were re-extracted with EtOAc. The combined organic extracts were washed once more with saturated aqueous NaCl, then dried ( $\text{Na}_2\text{SO}_4$ ) and concentrated under a stream of  $\text{N}_2$ . PTLC ( $\text{SiO}_2$ , 94:3:3 EtOAc/MeOH/ $\text{Et}_3\text{N}$ ) gave (+)-**19** (0.64 mg, 67%) as a colorless film:  $[\alpha]_{\text{D}}^{23} +68$  ( $c$  0.05,  $\text{CHCl}_3$ );  $^1\text{H}$  NMR (600 MHz,  $\text{CDCl}_3$ )  $\delta$  10.17 (br s, 1H), 8.04 (br s, 1H), 7.48 (br s, 1H), 7.18 (br s, 1H), 7.12 (m, 2H), 6.57 (br s, 1H), 6.14 (d,  $J = 9.0$  Hz, 1H), 6.07 (s, 1H), 4.64 (d,  $J = 9.6$  Hz), 3.90 (m, 1H), 3.78 (s, 3H), 3.77 (s, 3H), 3.60 (s, 1H), 3.58 (s, 3H), 3.03 (dt,  $J = 9.0, 1.8$  Hz, 1H), 2.95 (d,  $J = 11.4$  Hz, 1H), 2.64 (s, 3H), 2.23 (q,  $J = 9.0$  Hz, 1H), 2.14 (m, 1H), 2.08 (br s, 1H), 1.96 (s, 3H), 1.94–1.83 (m, 2H), 1.90 (dt,  $J = 8.4, 4.0$  Hz, 1H), 0.89 (br m, 3H), 0.82 (t,  $J = 7.2$  Hz, 3H); IR (neat)  $\nu_{\max}$  2950, 1738, 1664, 1617, 1502, 1459, 1434, 1366, 1323, 1306, 1227, 1178, 1150, 1130, 1091, 1062, 1040, 1003, 920, 821, 732, 671  $\text{cm}^{-1}$ ; ESI-TOF HRMS  $m/z$  812.4593 ( $\text{M}+\text{H}^+$ ,  $\text{C}_{46}\text{H}_{61}\text{N}_5\text{O}_8$  requires 812.4593).

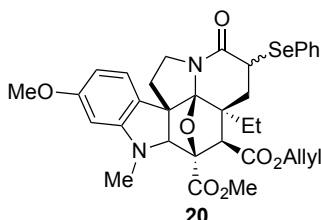

**Compound (+)-20.** A solution of **8c** (140 mg, 0.28 mmol) in THF (3 mL) was treated with LiHMDS (0.56 mL, 1.0 M in THF) at  $-78$   $^\circ\text{C}$ . After stirring at the same temperature for 30 min, PhSeCl was added in one portion followed by a second portion of LiHMDS. After stirring at  $-78$   $^\circ\text{C}$  for another 1 h, the reaction was quenched by

addition of saturated aqueous NaHCO<sub>3</sub>. The reaction mixture was extracted with EtOAc (3×5 mL). The combined organic extracts were washed with saturated aqueous NaCl, dried (Na<sub>2</sub>SO<sub>4</sub>) and concentrated under reduced pressure. Flash chromatography (SiO<sub>2</sub>, 33% EtOAc/hexanes) provided (+)-**20** as a mixture of two diastereomers (**20a/20b** = 3:1, 156 mg, 85%) as light yellow oil. For (+)-**20a**: [ $\alpha$ ]<sub>D</sub><sup>25</sup> +138 (*c* 1.0, CHCl<sub>3</sub>); <sup>1</sup>H NMR (600 MHz, CDCl<sub>3</sub>)  $\delta$  7.67–7.61 (m, 2H), 7.31–7.22 (m, 3H), 6.72 (d, *J* = 8.2 Hz, 1H), 6.19 (dd, *J* = 8.2, 2.2 Hz, 1H), 6.05 (d, *J* = 2.2 Hz, 1H), 5.71 (ddt, *J* = 17.2, 10.3, 6.1 Hz, 1H), 5.26 (dd, *J* = 17.1, 1.4 Hz, 1H), 5.20 (dd, *J* = 10.4, 1.2 Hz, 1H), 4.41–4.35 (m, 2H), 4.06–3.97 (m, 2H), 3.97–3.89 (m, 2H), 3.83 (s, 3H), 3.78 (s, 3H), 3.49 (s, 1H), 2.87 (s, 3H), 2.58–2.46 (m, 2H), 2.18 (ddd, *J* = 12.6, 7.8, 1.4 Hz, 1H), 1.55 (dd, *J* = 13.5, 5.7 Hz, 1H), 1.02–0.91 (m, 1H), 0.64–0.58 (m, 1H), 0.58–0.53 (m, 3H); <sup>13</sup>C NMR (151 MHz, CDCl<sub>3</sub>)  $\delta$  170.1, 169.4, 168.7, 161.2, 153.9, 135.3, 130.8, 128.5, 128.0, 127.8, 123.4, 120.1, 119.0, 104.7, 102.9, 94.3, 86.7, 83.2, 65.4, 63.8, 54.9, 54.2, 52.1, 48.7, 46.9, 38.1, 37.2, 35.1, 31.7, 24.5, 8.3; IR (neat)  $\nu_{\max}$  2953, 1731, 1660, 1619, 1499, 1400, 1374, 1246, 1173, 1124, 1100, 750 cm<sup>-1</sup>; ESI-TOF HRMS *m/z* 653.1763 (M+H<sup>+</sup>, C<sub>33</sub>H<sub>36</sub>N<sub>2</sub>O<sub>7</sub>Se requires 653.1760). For (+)-**20b**: [ $\alpha$ ]<sub>D</sub><sup>26</sup> +122 (*c* 0.35, CHCl<sub>3</sub>); <sup>1</sup>H NMR (600 MHz, CDCl<sub>3</sub>)  $\delta$  7.75–7.69 (m, 2H), 7.31–7.27 (m, 3H), 6.82 (d, *J* = 8.2 Hz, 1H), 6.26 (dd, *J* = 8.2, 2.2 Hz, 1H), 6.10 (d, *J* = 2.2 Hz, 1H), 5.80 (ddt, *J* = 16.6, 10.3, 6.1 Hz, 1H), 5.29 (dd, *J* = 17.2, 1.4 Hz, 1H), 5.21 (dd, *J* = 10.4, 1.2 Hz, 1H), 4.57–4.51 (m, 1H), 4.51–4.45 (m, 1H), 4.08–3.97 (m, 4H), 3.83 (s, 3H), 3.81 (s, 3H), 3.54 (s, 1H), 2.95 (ddd, *J* = 15.2, 7.9, 1.8 Hz, 1H), 2.90 (s, 3H), 2.53–2.46 (m, 1H), 2.28–2.15 (m, 2H), 2.05 (dd, *J* = 15.0, 1.3 Hz, 1H), 1.18 (dt, *J* = 15.8, 7.1 Hz, 1H), 0.92 (t, *J* = 7.2 Hz, 3H), 0.89–0.81 (m, 1H); <sup>13</sup>C NMR (151 MHz, CDCl<sub>3</sub>)  $\delta$  170.6, 170.2, 169.9, 161.7, 154.4, 133.6, 131.5, 131.3, 129.1, 127.7, 123.9, 120.8, 119.5, 105.1, 103.5, 95.0, 87.2, 83.8, 66.0, 65.0, 55.4, 54.7, 52.6, 49.0, 47.6, 39.3, 37.8, 35.7, 30.9, 25.6, 10.1; IR (neat)  $\nu_{\max}$  2953, 1731, 1663, 1619, 1499, 1402, 1376, 1248, 1174, 1126, 1078, 1025, 752 cm<sup>-1</sup>; ESI-TOF HRMS *m/z* 653.1763 (M+H<sup>+</sup>, C<sub>33</sub>H<sub>36</sub>N<sub>2</sub>O<sub>7</sub>Se requires 653.1760).

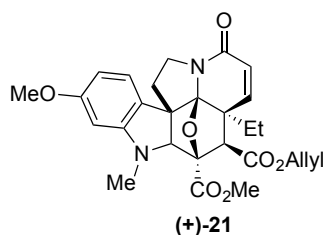

**Compound (+)-21.** A solution of (+)-**20** (74 mg, 0.11 mmol) in THF (3.5 mL) was treated with aqueous H<sub>2</sub>O<sub>2</sub> solution (28  $\mu$ L, 35% w/w, 0.34 mmol) at 0 °C, and the reaction mixture was stirred at the same temperature until the consumption of starting material by TLC. The reaction was quenched by addition of saturated aqueous Na<sub>2</sub>S<sub>2</sub>O<sub>3</sub> and the mixture was extracted with EtOAc. The combined organic extracts were washed with saturated aqueous NaCl, dried (Na<sub>2</sub>SO<sub>4</sub>) and concentrated under reduced pressure. Flash chromatography (SiO<sub>2</sub>, 50% EtOAc/hexanes) provided (+)-**21** (48.1 mg, 86%) as a colorless oil: [ $\alpha$ ]<sub>D</sub><sup>25</sup> +110 (*c* 1.0, CHCl<sub>3</sub>); <sup>1</sup>H NMR (600 MHz, CDCl<sub>3</sub>)  $\delta$  6.91 (d, *J* = 8.2 Hz, 1H), 6.22 (dd, *J* = 8.2, 2.3 Hz, 1H), 6.08 (d, *J* = 2.3 Hz, 1H), 5.99 (d, *J* = 10.1 Hz, 1H), 5.93 (d, *J* = 10.1 Hz, 1H), 5.92–5.84 (m, 1H), 5.34 (dd, *J* = 17.2, 1.4 Hz, 1H), 5.26 (dd, *J* = 10.4, 1.3 Hz, 1H), 4.63 (ddt, *J* = 13.1, 6.0, 1.3 Hz, 1H), 4.57 (ddt, *J* = 13.0,

6.0, 1.3 Hz, 1H), 4.15 (ddd,  $J = 11.5, 10.0, 1.3$  Hz, 1H), 4.06 (s, 1H), 3.99–3.90 (m, 1H), 3.83 (s, 3H), 3.79 (s, 3H), 3.65 (s, 1H), 2.91 (s, 3H), 2.51 (dt,  $J = 12.6, 10.5$  Hz, 1H), 2.23 (ddd,  $J = 12.6, 7.6, 1.3$  Hz, 1H), 1.17 (dq,  $J = 15.1, 7.6$  Hz, 1H), 0.97 (dq,  $J = 14.4, 7.2$  Hz, 1H), 0.57 (t,  $J = 7.4$  Hz, 3H);  $^{13}\text{C}$  NMR (151 MHz,  $\text{CDCl}_3$ )  $\delta$  170.3, 169.6, 163.2, 161.8, 154.7, 143.5, 131.2, 124.2, 123.8, 119.6, 119.6, 104.9, 103.1, 94.5, 86.1, 83.8, 65.9, 64.9, 56.4, 56.4, 55.4, 52.8, 52.6, 46.6, 37.7, 35.6, 28.1, 8.7; IR (neat)  $\nu_{\text{max}}$  2953, 1765, 1732, 1677, 1613, 1500, 1413, 1359, 1243, 1199, 1174, 1132, 1103, 1031, 816  $\text{cm}^{-1}$ ; ESI-TOF HRMS  $m/z$  495.2125 ( $\text{M}+\text{H}^+$ ,  $\text{C}_{27}\text{H}_{30}\text{N}_2\text{O}_7$  requires 495.2126).

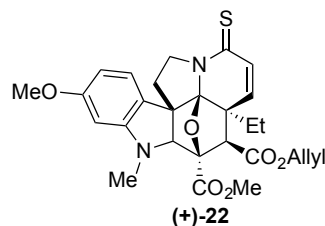

**Compound (+)-22.** A mixture of (+)-21 (23.6 mg, 47.7  $\mu\text{mol}$ ) and Lawesson's reagent (23.6 mg, 58.3  $\mu\text{mol}$ ) in toluene (3.0 mL) was heated at 100  $^{\circ}\text{C}$  for 1 h. The solvent was removed under reduced pressure and the crude residue was directly loaded onto silica gel column. Flash chromatography ( $\text{SiO}_2$ , 33% EtOAc/hexanes) provided (+)-22 (22.3 mg, 92%) as a yellow oil:  $[\alpha]_{\text{D}}^{23} +60$  ( $c$  1.0,  $\text{CHCl}_3$ );  $^1\text{H}$  NMR (600 MHz,  $\text{CDCl}_3$ )  $\delta$  6.96 (d,  $J = 8.2$  Hz, 1H), 6.47 (d,  $J = 9.8$  Hz, 1H), 6.22 (dd,  $J = 8.2, 2.3$  Hz, 1H), 6.09 (d,  $J = 2.2$  Hz, 1H), 5.89 (ddt,  $J = 16.6, 10.6, 5.9$  Hz, 1H), 5.63 (d,  $J = 9.7$  Hz, 1H), 5.35 (dd,  $J = 17.3, 1.6$  Hz, 1H), 5.27 (dd,  $J = 10.4, 1.4$  Hz, 1H), 4.67–4.56 (m, 2H), 4.46 (dd,  $J = 13.4, 9.6$  Hz, 1H), 4.17 (ddd,  $J = 13.4, 11.3, 7.5$  Hz, 1H), 4.11 (s, 1H), 3.84 (s, 3H), 3.80 (s, 3H), 3.68 (s, 1H), 2.93 (s, 3H), 2.58 (td,  $J = 12.0, 9.9$  Hz, 1H), 2.29 (dd,  $J = 12.6, 7.4$  Hz, 1H), 1.21 (dq,  $J = 15.1, 7.7$  Hz, 1H), 0.98 (dq,  $J = 14.4, 7.1$  Hz, 1H), 0.54 (t,  $J = 7.4$  Hz, 3H);  $^{13}\text{C}$  NMR (151 MHz,  $\text{CDCl}_3$ )  $\delta$  190.6, 170.0, 169.4, 162.0, 154.8, 134.7, 131.2, 131.1, 123.9, 119.6, 119.3, 103.2, 102.5, 94.6, 86.2, 84.0, 66.0, 65.5, 56.4, 55.4, 53.3, 53.1, 52.7, 37.3, 35.7, 28.2, 8.7; IR (neat)  $\nu_{\text{max}}$  2951, 1765, 1732, 1612, 1500, 1429, 1355, 1324, 1247, 1174, 1128, 1102, 1028, 897, 734  $\text{cm}^{-1}$ ; ESI-TOF HRMS  $m/z$  511.1896 ( $\text{M}+\text{H}^+$ ,  $\text{C}_{27}\text{H}_{30}\text{N}_2\text{O}_6\text{S}$  requires 511.1897).

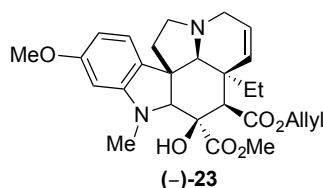

**Compound (-)-23.** A solution of (+)-22 (6.1 mg, 11.9  $\mu\text{mol}$ ) in  $\text{CH}_2\text{Cl}_2$  (0.5 mL) was treated with  $\text{Me}_3\text{OBF}_4$  (5.2 mg, 35  $\mu\text{mol}$ ) at room temperature. The reaction mixture was stirred for 30 min and the solvent was removed under a stream of nitrogen. The residue was dissolved in MeOH (0.5 mL), cooled to 0  $^{\circ}\text{C}$  and treated with  $\text{NaBH}_4$  (1.4 mg, 35.7  $\mu\text{mol}$ ). After two more additions of  $\text{NaBH}_4$  in 15 min intervals, the reaction was quenched with the addition of saturated aqueous  $\text{NaHCO}_3$  (2.0 mL). The reaction mixture was extracted with  $\text{CH}_2\text{Cl}_2$  ( $4 \times 2.0$  mL). The combined organic phase was washed with saturated aqueous NaCl and dried over  $\text{Na}_2\text{SO}_4$ . The solvent was removed



under vacuum and the residue was purified by PTLC (SiO<sub>2</sub>, 75% EtOAc/hexanes) to afford (–)-**23** (3.6 mg, 62%) as a colorless oil:  $[\alpha]_D^{28} -2.6$  (*c* 1.0, CHCl<sub>3</sub>); <sup>1</sup>H NMR (600 MHz, CDCl<sub>3</sub>) δ 9.49 (s, 1H), 6.87 (d, *J* = 8.1 Hz, 1H), 6.28 (dd, *J* = 8.1, 2.2 Hz, 1H), 6.05 (d, *J* = 2.2 Hz, 1H), 5.92 (ddt, *J* = 16.5, 11.0, 5.8 Hz, 1H), 5.85 (ddd, *J* = 10.2, 5.2, 1.5 Hz, 1H), 5.34 (dd, *J* = 17.2, 1.8 Hz, 1H), 5.23–5.15 (m, 2H), 4.66 (dd, *J* = 13.3, 5.9 Hz, 1H), 4.55 (dd, *J* = 13.3, 5.8 Hz, 1H), 3.78 (s, 3H), 3.78 (s, 3H), 3.66 (s, 1H), 3.49–3.35 (m, 2H), 3.11 (s, 1H), 2.79 (dt, *J* = 15.9, 2.1 Hz, 1H), 2.73 (s, 1H), 2.68 (s, 3H), 2.52 (td, *J* = 10.3, 7.2 Hz, 1H), 2.35–2.20 (m, 2H), 1.82 (dq, *J* = 14.7, 7.4 Hz, 1H), 1.00 (dq, *J* = 14.4, 7.2 Hz, 1H), 0.59 (t, *J* = 7.3 Hz, 3H); <sup>13</sup>C NMR (151 MHz, CDCl<sub>3</sub>) δ 173.6, 171.8, 161.1, 153.7, 132.3, 131.2, 125.0, 125.0, 122.6, 118.4, 104.3, 95.6, 83.2, 78.5, 65.7, 65.0, 55.4, 53.3, 52.3, 51.8, 51.2, 50.8, 44.6, 40.9, 38.4, 32.0, 8.0; IR (neat)  $\nu_{\max}$  3733, 3628, 2933, 1735, 1615, 1503, 1457, 1247, 1167, 1087, 669, 650 cm<sup>-1</sup>; ESI-TOF HRMS *m/z* 483.2491 (M+H<sup>+</sup>, C<sub>27</sub>H<sub>34</sub>N<sub>2</sub>O<sub>6</sub> requires 483.2490).

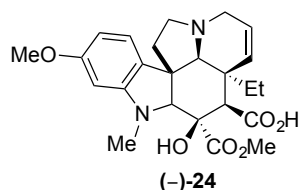

**Compound (–)-24.** Morpholine (8.0 μL, 92.7 μmol) and Pd(PPh<sub>3</sub>)<sub>4</sub> (1.1 mg, 0.9 μmol) were added to a mixture of (–)-**23** (4.5 mg, 9.0 μmol) in THF (0.5 mL) and DMSO (50 μL). After stirring for 1 h, the solvent was removed under a stream of N<sub>2</sub>. PTLC (SiO<sub>2</sub>, 10% MeOH/CH<sub>2</sub>Cl<sub>2</sub>) provided (–)-**24** (3.0 mg, 73%) as a clear, colorless oil:  $[\alpha]_D^{26} -6.7$  (*c* 1.0, CHCl<sub>3</sub>); <sup>1</sup>H NMR (600 MHz, CDCl<sub>3</sub>) δ 6.86 (d, *J* = 8.2 Hz, 1H), 6.29 (dd, *J* = 8.2, 2.3 Hz, 1H), 6.05 (d, *J* = 2.2 Hz, 1H), 5.88 (ddd, *J* = 10.2, 5.0, 1.7 Hz, 1H), 5.40 (dt, *J* = 10.2, 2.1 Hz, 1H), 3.82 (s, 3H), 3.76 (s, 3H), 3.70 (s, 1H), 3.50–3.41 (m, 2H), 3.04 (s, 1H), 2.92 (dt, *J* = 16.3, 2.2 Hz, 1H), 2.79 (s, 1H), 2.69 (s, 3H), 2.67–2.60 (m, 1H), 2.35–2.22 (m, 2H), 1.68 (dq, *J* = 14.7, 7.4 Hz, 1H), 0.97 (dq, *J* = 14.4, 7.3 Hz, 1H), 0.58 (t, *J* = 7.4 Hz, 3H); <sup>13</sup>C NMR (151 MHz, CDCl<sub>3</sub>) δ 172.2, 172.1, 161.3, 153.5, 132.2, 124.7, 123.6, 122.5, 104.8, 96.0, 80.6, 78.6, 64.8, 55.4, 53.0, 52.9, 52.1, 50.8, 50.7, 43.5, 40.1, 38.7, 32.3, 7.8; IR (neat)  $\nu_{\max}$  2924, 1734, 1613, 1597, 1501, 1226, 1168, 1088, 1038, 821, 729, 701 cm<sup>-1</sup>; ESI-TOF HRMS *m/z* 443.2188 (M+H<sup>+</sup>, C<sub>24</sub>H<sub>30</sub>N<sub>2</sub>O<sub>6</sub> requires 443.2177). The structure and the absolute configuration of (+)-**24** were unambiguously established with a single crystal X-ray structure determination conducted on a colorless prism crystal obtained from vapor diffusion of hexane into a EtOAc solution of (+)-**24** (CCDC 1475226).

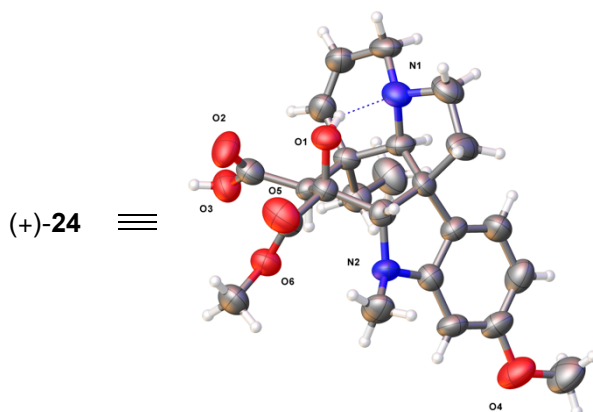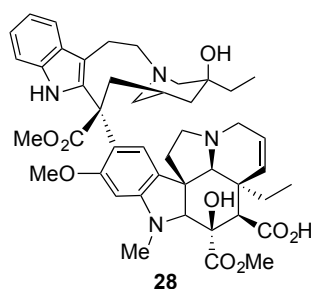

**Compound 28.** (–)-**24** (11.9 mg, 27  $\mu$ mol) and catharanthine sulfate (23.5 mg, 54  $\mu$ mol) were combined with TFE (100  $\mu$ L), aqueous 0.1 N HCl (0.5 mL) and water (0.5 mL) in a 2-dram vial. The vial was fitted with a rubber septum and flushed with Ar.  $\text{FeCl}_3 \cdot 6\text{H}_2\text{O}$  (36.5 mg, 135  $\mu$ mol) was added producing a bright yellow precipitate. The mixture was stirred for 2 h. Meanwhile, a suspension of  $\text{Fe}_2(\text{ox})_3 \cdot 6\text{H}_2\text{O}$  (130 mg, 269  $\mu$ mol) in water (98 mL) was stirred for 2 h, by which time the  $\text{Fe}_2(\text{ox})_3 \cdot 6\text{H}_2\text{O}$  was completely dissolved. This mixture was cooled to 0 °C and air was bubbled vigorously through the solution for 15–20 min. The  $\text{FeCl}_3$  coupling mixture was transferred to the  $\text{Fe}_2(\text{ox})_3/\text{O}_2$  solution by pipette, then  $\text{NaBH}_4$  (10.5 mg, 529  $\mu$ mol) was added as a solution in water (1 mL). After stirring for 30 min, the reaction mixture was extracted with 10% MeOH/ $\text{CH}_2\text{Cl}_2$  (4  $\times$  80 mL). The combined organic extracts were dried ( $\text{Na}_2\text{SO}_4$ ) and concentrated under reduced pressure. PTLC ( $\text{SiO}_2$ , 83:16:1  $\text{CH}_2\text{Cl}_2/\text{MeOH}/\text{AcOH}$ ) gave **28** (5.2 mg, 24%) as a colorless film, along with the corresponding leurosidine analogue (4.0 mg, 19%) and anhydrovinblastine analogue (2.5 mg, 12%) also as colorless films. For **28**:  $[\alpha]_D^{22} +2.1$  (*c* 0.08, MeOH);  $^1\text{H}$  NMR (600 MHz,  $\text{CD}_3\text{OD}$ )  $\delta$  9.44 (br s, 1H), 7.52 (d, *J* = 8.0 Hz, 1H), 7.29 (d, *J* = 8.1 Hz, 1H), 7.14 (ddd, *J* = 8.2, 7.0, 1.1 Hz, 1H), 7.07 (t, *J* = 7.4 Hz, 1H), 6.73 (s, 1H), 6.43 (s, 1H), 5.95 (ddd, *J* = 10.4, 5.5, 1.7 Hz, 1H), 5.56–5.51 (m, 1H), 4.66 (dd, *J* = 17.4, 10.5 Hz, 1H), 3.98–3.88 (m, 3H), 3.86 (s, 3H), 3.83 (s, 3H), 3.78 (s, 1H), 3.75–3.71 (m, 1H), 3.69 (s, 3H), 3.67–3.62 (m, 1H), 3.62 (s, 1H), 3.53–3.48 (m, 1H), 3.38–3.32 (m, 1H), 3.25 (td, *J* = 11.5, 5.3 Hz, 1H), 3.19 (s, 2H), 2.99 (s, 1H), 2.89 (dd, *J* = 14.5, 6.1 Hz, 1H), 2.78 (s, 3H), 2.48 (d, *J* = 15.8 Hz, 1H), 2.35 (ddd, *J* = 14.1, 9.2, 5.5 Hz, 1H), 2.21–2.13 (m, 1H), 2.07 (ddd, *J* = 13.2, 11.5, 6.2 Hz, 1H), 1.72–1.61 (m, 2H), 1.57–1.46 (m, 3H), 1.43–1.34 (m, 1H), 0.98 (t, *J* = 7.5 Hz, 3H), 0.89 (t, *J* = 7.4 Hz, 3H); IR (neat)  $\nu_{\text{max}}$  3419, 2950, 1673, 1615, 1459, 1435, 1198, 1136, 1038, 998, 799, 721, 668  $\text{cm}^{-1}$ ; ESI-TOF HRMS *m/z* 797.4122 ( $\text{M}+\text{H}^+$ ,  $\text{C}_{45}\text{H}_{56}\text{N}_4\text{O}_9$  requires 797.4120).

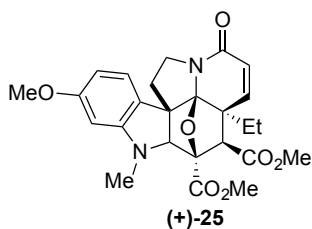

**Compound (+)-25.** A solution of (+)-**21** (21.7 mg, 44  $\mu\text{mol}$ ) in MeOH (2 mL) was treated with MeONa (11.9 mg, 0.21 mmol) at room temperature. After stirring for 1 h, the solvent was removed under vacuum. Flash chromatography ( $\text{SiO}_2$ , 50% EtOAc/hexanes) provided (+)-**25** (20.5 mg, quant.) as a colorless oil:  $[\alpha]_{\text{D}}^{27} +34$  ( $c$  1.0,  $\text{CHCl}_3$ );  $^1\text{H NMR}$  (600 MHz,  $\text{CDCl}_3$ )  $\delta$  6.91 (d,  $J = 8.3$  Hz, 1H), 6.22 (dd,  $J = 8.2, 2.3$  Hz, 1H), 6.08 (d,  $J = 2.3$  Hz, 1H), 6.00 (d,  $J = 10.0$  Hz, 1H), 5.89 (d,  $J = 10.1$  Hz, 1H), 4.15 (ddd,  $J = 11.6, 9.9, 1.3$  Hz, 1H), 4.07 (s, 1H), 3.98–3.90 (m, 1H), 3.85 (s, 3H), 3.79 (s, 3H), 3.71 (s, 3H), 3.65 (s, 1H), 2.92 (s, 3H), 2.52 (dt,  $J = 12.7, 10.4$  Hz, 1H), 2.27–2.18 (m, 1H), 1.17 (dq,  $J = 15.1, 7.6$  Hz, 1H), 0.97 (dq,  $J = 14.4, 7.1$  Hz, 1H), 0.57 (t,  $J = 7.4$  Hz, 3H);  $^{13}\text{C NMR}$  (151 MHz,  $\text{CDCl}_3$ )  $\delta$  170.4, 170.4, 163.3, 154.7, 143.5, 124.3, 123.8, 119.6, 104.9, 103.1, 94.5, 86.1, 83.8, 64.9, 56.4, 55.4, 52.8, 52.7, 52.1, 46.7, 37.7, 35.6, 28.0, 8.7; IR (neat)  $\nu_{\text{max}}$  2953, 1764, 1734, 1679, 1613, 1500, 1437, 1416, 1359, 1249, 1201, 1175, 1104, 1033, 817, 732  $\text{cm}^{-1}$ ; ESI-TOF HRMS  $m/z$  469.1961 ( $\text{M}+\text{H}^+$ ,  $\text{C}_{25}\text{H}_{28}\text{N}_2\text{O}_7$  requires 469.1969).

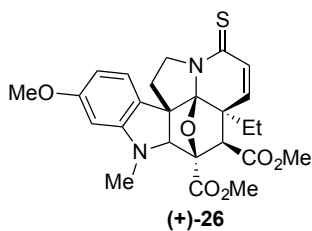

**Compound (+)-26.** A mixture of (+)-**25** (20 mg, 43  $\mu\text{mol}$ ) and Lawesson's reagent (19 mg, 47  $\mu\text{mol}$ ) in toluene (2.0 mL) was heated at 100  $^\circ\text{C}$  for 1 h. Solvent was removed under reduced pressure and crude residue was directly loaded onto a silica gel column. Flash chromatography ( $\text{SiO}_2$ , 33% EtOAc/hexanes) provided (+)-**26** (18 mg, 87%) as a yellow oil:  $[\alpha]_{\text{D}}^{26} +66$  ( $c$  1.0,  $\text{CHCl}_3$ );  $^1\text{H NMR}$  (600 MHz,  $\text{CDCl}_3$ )  $\delta$  6.96 (d,  $J = 8.2$  Hz, 1H), 6.48 (d,  $J = 9.8$  Hz, 1H), 6.22 (dd,  $J = 8.2, 2.4$  Hz, 1H), 6.09 (d,  $J = 2.3$  Hz, 1H), 5.58 (d,  $J = 9.8$  Hz, 1H), 4.49–4.41 (m, 1H), 4.22–4.12 (m, 1H), 4.10 (s, 1H), 3.86 (s, 3H), 3.80 (s, 3H), 3.72 (s, 3H), 3.67 (s, 1H), 2.93 (s, 3H), 2.58 (td,  $J = 12.2, 9.9$  Hz, 1H), 2.29 (dd,  $J = 12.6, 7.4$  Hz, 1H), 1.26–1.16 (m, 2H), 0.97 (dq,  $J = 14.4, 7.2$  Hz, 1H), 0.54 (t,  $J = 7.4$  Hz, 3H);  $^{13}\text{C NMR}$  (151 MHz,  $\text{CDCl}_3$ )  $\delta$  190.6, 170.2, 170.1, 162.0, 154.8, 134.7, 131.2, 123.9, 119.3, 103.2, 102.5, 94.6, 86.2, 84.0, 65.5, 56.4, 55.4, 53.2, 53.1, 52.7, 52.2, 37.3, 35.7, 28.1, 8.6; IR (neat)  $\nu_{\text{max}}$  2953, 1765, 1735, 1614, 1500, 1431, 1355, 1249, 1200, 1174, 1102, 1031, 909, 731  $\text{cm}^{-1}$ ; ESI-TOF HRMS  $m/z$  485.1740 ( $\text{M}+\text{H}^+$ ,  $\text{C}_{25}\text{H}_{28}\text{N}_2\text{O}_6\text{S}$  requires 485.1741).

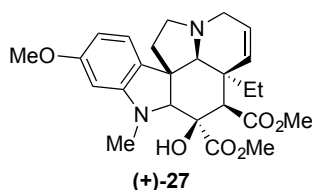

**Compound (+)-27.** A solution of (+)-26 (18 mg, 37  $\mu\text{mol}$ ) in  $\text{CH}_2\text{Cl}_2$  (1 mL) was treated with  $\text{Me}_3\text{OBF}_4$  (16.5 mg, 0.11 mmol) at room temperature. The reaction mixture was stirred for 30 min and the solvent was removed under a stream of nitrogen. The residue was dissolved in MeOH (1 mL), cooled to 0  $^\circ\text{C}$  and treated with  $\text{NaBH}_4$  (4.2 mg, 0.11 mmol). After two more additions of  $\text{NaBH}_4$  in 15 min intervals, the reaction was quenched with the addition of saturated aqueous  $\text{NaHCO}_3$  (2.0 mL). The reaction mixture was extracted with  $\text{CH}_2\text{Cl}_2$  ( $4 \times 2.0$  mL). The combined organic phase was washed with saturated aqueous NaCl and dried over  $\text{Na}_2\text{SO}_4$ . The solvent was removed under vacuum and the residue was purified by PTLC ( $\text{SiO}_2$ , 75% EtOAc/hexanes) to afford (+)-27 (10.3 mg, 61%):  $[\alpha]_{\text{D}}^{25} +2.6$  ( $c$  0.33,  $\text{CHCl}_3$ ),  $[\alpha]_{\text{D}}^{28} -28.1$  ( $c$  0.334, MeOH);  $^1\text{H}$  NMR (600 MHz,  $\text{CDCl}_3$ )  $\delta$  9.56 (br s, 1H), 6.87 (d,  $J = 8.4$  Hz, 1H), 6.26 (dd,  $J = 8.4, 2.1$  Hz, 1H), 6.02 (d,  $J = 2.1$  Hz, 1H), 5.85 (dd,  $J = 10.2, 4.2$  Hz, 1H), 5.13 (d,  $J = 10.2$  Hz, 1H), 3.77 (s, 3H), 3.75 (s, 3H), 3.66 (s, 3H), 3.66 (s, 1H), 3.50–3.44 (m, 2H), 3.08 (s, 1H), 2.85 (d,  $J = 15.6$  Hz, 1H), 2.78 (s, 1H), 2.66 (s, 3H), 2.60–2.55 (m, 1H), 2.33–2.23 (m, 2H), 1.77 (dq,  $J = 14.4, 7.2$  Hz, 1H), 0.98 (dq,  $J = 14.4, 7.2$  Hz, 1H), 0.57 (t,  $J = 7.2$  Hz, 3H);  $^{13}\text{C}$  NMR (150 MHz,  $\text{CDCl}_3$ )  $\delta$  173.5, 172.7, 161.1, 153.6, 131.2, 124.79, 124.78, 122.6, 104.4, 95.6, 82.8, 78.6, 65.8, 55.3, 53.3, 52.3, 51.8, 51.4, 51.2, 50.7, 44.4, 40.8, 38.4, 32.0, 7.9; IR (neat)  $\nu_{\text{max}}$  3375, 2950, 2876, 1734, 1614, 1502, 1454, 1435, 1360, 1332, 1168, 1087, 1041, 979, 942, 915, 825, 730  $\text{cm}^{-1}$ ; ESI-TOF HRMS  $m/z$  457.2331 ( $\text{M}+\text{H}^+$ ,  $\text{C}_{25}\text{H}_{33}\text{N}_2\text{O}_6$  requires 457.2333).

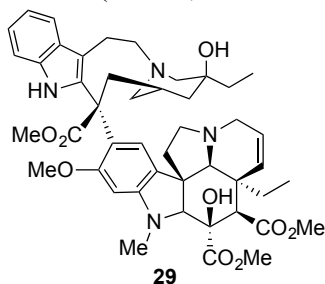

**Compound 29.** (+)-27 (6.3 mg, 13.8  $\mu\text{mol}$ ) and catharanthine sulfate (5.3 mg, 6.90  $\mu\text{mol}$ ) were combined with TFE (63  $\mu\text{L}$ ), aqueous 0.1 N HCl (0.32 mL) and water (0.32 mL) in a 2-dram vial. The vial was fitted with a rubber septum and flushed with Ar.  $\text{FeCl}_3 \cdot 6\text{H}_2\text{O}$  (18.7 mg, 69.0  $\mu\text{mol}$ ) was added producing a bright yellow precipitate. The mixture was stirred for 2 h during which time the precipitate re-dissolved leaving a clear, yellow solution. Meanwhile, a suspension of  $\text{Fe}_2(\text{ox})_3 \cdot 6\text{H}_2\text{O}$  (66.8 mg, 138  $\mu\text{mol}$ ) in water (58 mL) was stirred for 2 h, by which time the  $\text{Fe}_2(\text{ox})_3 \cdot 6\text{H}_2\text{O}$  was completely dissolved. This mixture was cooled to 0  $^\circ\text{C}$  and air was bubbled vigorously through the solution for 15–20 min. The  $\text{FeCl}_3$  coupling mixture was transferred to the  $\text{Fe}_2(\text{ox})_3/\text{O}_2$  solution by pipette, then  $\text{NaBH}_4$  (10.5 mg, 330  $\mu\text{mol}$ ) was added as a solution in water (1 mL). After stirring for 30 min, the reaction was quenched by the addition of aqueous  $\text{NH}_4\text{OH}$  (16 mL) and the resulting mixture was extracted with 10% MeOH/ $\text{CH}_2\text{Cl}_2$  (4

× 50 mL). The combined organic extracts were dried (Na<sub>2</sub>SO<sub>4</sub>) and concentrated under reduced pressure. PTLC (SiO<sub>2</sub>, 97:3:3 EtOAc/MeOH/Et<sub>3</sub>N) gave **29** (3.5 mg, 31%) as a colorless film, along with the corresponding leurosidine analogue (2.3 mg, 21%) and anhydrovinblastine analogue (1.9 mg, 17%) also as colorless films. For **29**: [α]<sub>D</sub><sup>25</sup> +49 (*c* 0.18, CHCl<sub>3</sub>); <sup>1</sup>H NMR (600 MHz, CDCl<sub>3</sub>) δ 9.75 (br s, 1H), 8.05 (s, 1H), 7.53 (d, *J* = 7.9 Hz, 1H), 7.20–7.06 (m, 3H), 6.65 (s, 1H), 6.08 (s, 1H), 5.88–5.80 (m, 1H), 5.15 (d, *J* = 10.2 Hz, 1H), 3.95 (t, *J* = 14.1 Hz, 1H), 3.80 (s, 3H), 3.78 (s, 3H), 3.71 (d, 3H), 3.65 (s, 1H), 3.61 (s, 3H), 3.41–3.23 (m, 2H), 3.13 (d, *J* = 14.6 Hz, 2H), 2.83–2.77 (m, 2H), 2.70 (s, 3H), 2.69 (s, 1H), 2.48–2.43 (m, 1H), 2.43–2.37 (m, 1H), 2.29 (d, *J* = 15.2 Hz, 1H), 2.16 (ddd, *J* = 14.9, 9.3, 6.1 Hz, 1H), 2.00 (dq, *J* = 14.7, 7.5 Hz, 1H), 1.87–1.78 (m, 1H), 1.47 (d, *J* = 14.3 Hz, 1H), 1.40 (dd, *J* = 14.3, 6.1 Hz, 1H), 0.94–0.84 (m, 6H); IR (neat) ν<sub>max</sub> 2940, 1731, 1657, 1613, 1502, 1458, 1432, 1362, 1333, 1295, 1224, 1169, 1142, 1090, 1039, 1004, 944, 921, 895, 848, 819, 795, 763, 730, 700 cm<sup>-1</sup>; ESI-TOF HRMS *m/z* 811.4263 (M+H<sup>+</sup>, C<sub>46</sub>H<sub>59</sub>N<sub>4</sub>O<sub>9</sub> requires 811.4276).

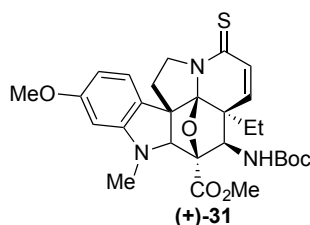

**Compound (+)-31.** Morpholine (54 μL, 0.62 mmol) and Pd(PPh<sub>3</sub>)<sub>4</sub> (7.2 mg, 6.2 μmol) were added to a mixture of (+)-**22** (31.8 mg, 62.3 μmol) in THF (1 mL) and DMSO (0.1 mL). After stirring for 1 h, the mixture was diluted with EtOAc (3 mL) and washed with aqueous 2 N HCl (3 × ca.1 mL), then saturated aqueous NaCl. The combined aqueous layers were re-extracted with EtOAc, then the combined EtOAc extracts were dried (Na<sub>2</sub>SO<sub>4</sub>) and concentrated to give the crude product. The crude product was directly dissolved in *t*-BuOH (1 mL, distilled from CaH<sub>2</sub> and stored over 4 Å MS) followed by addition of Et<sub>3</sub>N (18.8 mg, 0.186 mmol) and DPPA (34 mg, 0.124 mmol). The resulting mixture was heated at 85 °C for 16 h. Upon cooling to room temperature volatiles were evaporated under a stream of N<sub>2</sub>. Flash chromatography (SiO<sub>2</sub>, 33% EtOAc/hexanes) provided (+)-**31** (21.5 mg, 64%) as a yellow oil: [α]<sub>D</sub><sup>24</sup> +217 (*c* 0.6, CHCl<sub>3</sub>); <sup>1</sup>H NMR (600 MHz, CDCl<sub>3</sub>) δ 6.91 (d, *J* = 8.2 Hz, 1H), 6.55 (d, *J* = 9.8 Hz, 1H), 6.20 (dd, *J* = 8.2, 2.3 Hz, 1H), 6.09 (d, *J* = 2.3 Hz, 1H), 6.01 (d, *J* = 9.8 Hz, 1H), 4.83 (d, *J* = 11.5 Hz, 1H), 4.71 (d, *J* = 11.5 Hz, 1H), 4.45 (ddd, *J* = 13.5, 9.7, 1.1 Hz, 1H), 4.24–4.14 (m, 2H), 3.85 (s, 3H), 3.79 (s, 3H), 3.06 (s, 3H), 2.58–2.48 (m, 1H), 2.28 (ddd, *J* = 12.5, 7.6, 1.1 Hz, 1H), 1.43 (s, 9H), 1.07 (dq, *J* = 15.0, 7.5 Hz, 1H), 0.97–0.89 (m, 1H), 0.51 (t, *J* = 7.4 Hz, 3H); <sup>13</sup>C NMR (151 MHz, CDCl<sub>3</sub>) δ 190.4, 168.6, 162.0, 155.1, 154.6, 134.1, 131.3, 123.7, 119.2, 103.3, 102.3, 94.4, 90.2, 81.5, 80.4, 65.3, 61.4, 55.4, 53.9, 53.3, 52.6, 36.9, 35.6, 28.3, 28.1, 27.0, 8.6; IR (neat) ν<sub>max</sub> 2974, 1741, 1714, 1612, 1500, 1430, 1352, 1319, 1245, 1157, 1099, 1050, 891, 753 cm<sup>-1</sup>; ESI-TOF HRMS *m/z* 542.2320 (M+H<sup>+</sup>, C<sub>28</sub>H<sub>35</sub>N<sub>3</sub>O<sub>6</sub>S requires 542.2319).

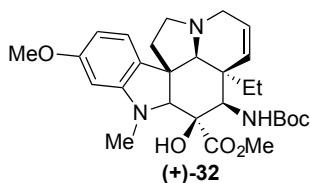

**Compound (+)-32.** A solution of (+)-31 (13 mg, 24  $\mu\text{mol}$ ) in  $\text{CH}_2\text{Cl}_2$  (0.5 mL) was treated with 4Å MS (260 mg), 2,6-di-*tert*-butylpyridine (104  $\mu\text{L}$ , 0.48 mmol) and  $\text{Me}_3\text{OBF}_4$  (10.6 mg, 0.72  $\mu\text{mol}$ ) at room temperature. The reaction mixture was stirred for 30 min and the solvent was removed under a stream of nitrogen. The residue was dissolved in MeOH (1 mL), cooled to 0 °C and treated with  $\text{NaBH}_4$  (2.7 mg, 72  $\mu\text{mol}$ ). After two more additions of  $\text{NaBH}_4$  in 15 min intervals, the reaction was quenched with the addition of saturated aqueous  $\text{NaHCO}_3$  (2.0 mL). The reaction mixture was extracted with  $\text{CH}_2\text{Cl}_2$  ( $4 \times 2.0$  mL). The combined organic phase was washed with saturated aqueous NaCl and dried over  $\text{Na}_2\text{SO}_4$ . The solvent was removed under vacuum and the residue was purified by PTLC ( $\text{SiO}_2$ , 50% acetone/hexanes) to afford (+)-32 (6.1 mg, 50%) as a colorless oil:  $[\alpha]_{\text{D}}^{24} +18$  ( $c$  0.75,  $\text{CHCl}_3$ );  $^1\text{H NMR}$  (600 MHz,  $\text{CDCl}_3$ )  $\delta$  9.32 (s, 1H), 6.87 (d,  $J = 8.2$  Hz, 1H), 6.27 (dd,  $J = 8.1, 2.3$  Hz, 1H), 6.04 (d,  $J = 2.2$  Hz, 1H), 5.79 (ddd,  $J = 10.2, 4.7, 1.7$  Hz, 1H), 5.31 (dt,  $J = 10.2, 2.0$  Hz, 1H), 5.03 (d,  $J = 10.3$  Hz, 1H), 4.29 (d,  $J = 10.2$  Hz, 1H), 3.78 (s, 3H), 3.77 (s, 3H), 3.64 (s, 1H), 3.50–3.43 (m, 1H), 3.43–3.35 (m, 1H), 2.81 (dd,  $J = 16.1, 2.3$  Hz, 1H), 2.66 (s, 3H), 2.60 (s, 1H), 2.52–2.45 (m, 1H), 2.30 (dd,  $J = 9.5, 6.0$  Hz, 2H), 1.62–1.55 (m, 1H), 1.41 (s, 9H), 1.12 (dq,  $J = 14.4, 7.3$  Hz, 1H), 0.46 (t,  $J = 7.4$  Hz, 3H); With minor (~10%) NHBoc rotamer peaks observed at:  $\delta$  6.90 (d,  $J = 8.2$  Hz, 1H), 6.30 (dd,  $J = 8.1, 2.3$  Hz, 1H), 6.10 (d,  $J = 2.3$  Hz, 1H), 4.84 (d,  $J = 10.1$  Hz, 1H), 4.21 (d,  $J = 10.1$  Hz, 1H), 3.62 (s, 1H), 1.47 (s, 9H).  $^{13}\text{C NMR}$  (151 MHz,  $\text{CDCl}_3$ )  $\delta$  172.9, 161.1, 155.5, 154.1, 132.4, 125.4, 123.4, 122.6, 104.5, 95.8, 83.1, 80.1, 78.8, 67.3, 55.4, 55.3, 52.4, 52.4, 51.5, 44.0, 43.2, 38.8, 32.1, 28.4, 7.8; With minor (~10%) NHBoc rotamer peaks observed at:  $\delta$  96.2, 67.5, 45.8; IR (neat)  $\nu_{\text{max}}$  2966, 2929, 1715, 1614, 1501, 1458, 1366, 1242, 1170, 1043, 727, 533  $\text{cm}^{-1}$ ; ESI-TOF HRMS  $m/z$  514.2911 ( $\text{M}+\text{H}^+$ ,  $\text{C}_{28}\text{H}_{39}\text{N}_3\text{O}_6$  requires 514.2911).

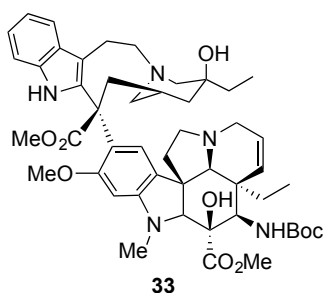

**Compound 33.** (+)-32 (4.2 mg, 8  $\mu\text{mol}$ ) and catharanthine sulfate (7.1 mg, 16  $\mu\text{mol}$ ) were combined with TFE (34  $\mu\text{L}$ ), aqueous 0.1 N HCl (0.17 mL) and water (0.17 mL) in a 2-dram vial. The vial was fitted with a rubber septum and flushed with Ar.  $\text{FeCl}_3 \cdot 6\text{H}_2\text{O}$  (11.1 mg, 41  $\mu\text{mol}$ ) was added producing a bright yellow precipitate. The mixture was stirred for 2 h. Meanwhile, a suspension of  $\text{Fe}_2(\text{ox})_3 \cdot 6\text{H}_2\text{O}$  (40 mg, 83  $\mu\text{mol}$ ) in water (33 mL) was stirred for 2 h, by which time the  $\text{Fe}_2(\text{ox})_3 \cdot 6\text{H}_2\text{O}$  was completely

dissolved. This mixture was cooled to 0 °C and air was bubbled vigorously through the solution for 15–20 min. The FeCl<sub>3</sub> coupling mixture was transferred to the Fe<sub>2</sub>(ox)<sub>3</sub>/O<sub>2</sub> solution by pipette, then NaBH<sub>4</sub> (6 mg, 158 μmol) was added as a solution in water (0.5 mL). After stirring for 30 min, the reaction was quenched by the addition of aqueous NH<sub>4</sub>OH (2 mL) and the resulting mixture was extracted with 10% MeOH/CH<sub>2</sub>Cl<sub>2</sub> (4 × 30 mL). The combined organic extracts were dried (Na<sub>2</sub>SO<sub>4</sub>) and concentrated under reduced pressure. PTLC (SiO<sub>2</sub>, 95:5:3 EtOAc/MeOH/Et<sub>3</sub>N) gave **33** (2.0 mg, 28%) as a white film, along with the corresponding leurosidine analogue (1.3 mg, 18%) and anhydrovinblastine analogue (1.6 mg, 24%) also as white films: [α]<sub>D</sub><sup>25</sup> +18 (*c* 0.40, CHCl<sub>3</sub>); <sup>1</sup>H NMR (600 MHz, CDCl<sub>3</sub>) δ 9.54 (br s, 1H), 8.03 (s, 1H), 7.51 (d, *J* = 7.9 Hz, 1H), 7.19–7.05 (m, 3H), 6.59 (s, 1H), 6.08 (s, 1H), 5.79 (ddd, *J* = 10.2, 4.8, 1.7 Hz, 1H), 5.35 (dt, *J* = 10.2, 2.1 Hz, 1H), 5.00 (d, *J* = 10.4 Hz, 1H), 4.25 (d, *J* = 10.3 Hz, 1H), 3.95 (t, *J* = 14.2 Hz, 1H), 3.78 (d, *J* = 1.6 Hz, 6H), 3.61 (s, 1H), 3.59 (s, 3H), 3.40 (d, *J* = 13.7 Hz, 1H), 3.37–3.28 (m, 2H), 3.28–3.21 (m, 1H), 3.18–3.08 (m, 2H), 2.86–2.76 (m, 2H), 2.70 (s, 3H), 2.62 (s, 1H), 2.48–2.36 (m, 2H), 2.33–2.25 (m, 1H), 2.15–2.06 (m, 1H), 1.81 (ddd, *J* = 13.6, 11.2, 5.0 Hz, 1H), 1.73 (dq, *J* = 14.9, 7.5 Hz, 2H), 1.54–1.45 (m, 2H), 1.43 (s, 9H), 1.36–1.27 (m, 3H), 0.88 (t, *J* = 7.5 Hz, 3H), 0.81 (t, *J* = 7.3 Hz, 3H); With minor (~4%) NHBoc rotamer peaks observed at: δ 6.14 (s, 1H), 5.30 (d, *J* = 10.5 Hz, 1H), 4.84 (d, *J* = 10.5 Hz, 1H), 1.51 (s, 9H); IR (neat) ν<sub>max</sub> 2930, 1737, 1716, 1614, 1498, 1457, 1431, 1366, 1330, 1297, 1223, 1172, 1098, 1035, 1011, 801, 751 cm<sup>-1</sup>; ESI-TOF HRMS *m/z* 868.4851 (M+H<sup>+</sup>, C<sub>49</sub>H<sub>65</sub>N<sub>5</sub>O<sub>9</sub> requires 868.4855).

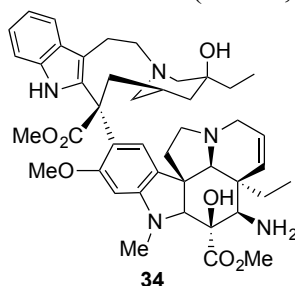

**Compound 34.** Compound **33** (3.2 mg, 3.7 μmol) was dissolved in 5:1 CH<sub>2</sub>Cl<sub>2</sub>/TFA (0.6 mL) and stirred for 2 h, then diluted with saturated aqueous NaHCO<sub>3</sub> (3 mL). The mixture was extracted with 10% MeOH/CH<sub>2</sub>Cl<sub>2</sub> (3 × 2 mL). The combined organic extracts were dried (Na<sub>2</sub>SO<sub>4</sub>) and concentrated under reduced pressure. The crude products were purified by PTLC (SiO<sub>2</sub>, 95:5:3 EtOAc/MeOH/Et<sub>3</sub>N) to give **34** (2.1 mg, 74%) as a white film: [α]<sub>D</sub><sup>26</sup> +54 (*c* 0.10, CHCl<sub>3</sub>); <sup>1</sup>H NMR (600 MHz, CDCl<sub>3</sub>) δ 9.46 (br s, 1H), 8.04 (s, 1H), 7.51 (d, *J* = 7.9 Hz, 1H), 7.21–7.07 (m, 3H), 6.59 (s, 1H), 6.10 (s, 1H), 5.80 (ddd, *J* = 10.4, 4.8, 1.6 Hz, 1H), 5.66 (dt, *J* = 10.3, 2.1 Hz, 1H), 3.94 (t, *J* = 14.4 Hz, 1H), 3.84 (s, 3H), 3.78 (s, 3H), 3.65 (s, 1H), 3.60 (s, 3H), 3.48–3.41 (m, 1H), 3.41–3.33 (m, 2H), 3.31 (dt, *J* = 5.2, 2.6 Hz, 1H), 3.30–3.23 (m, 2H), 3.21–3.11 (m, 3H), 2.84 (dt, *J* = 16.0, 2.2 Hz, 1H), 2.72 (s, 3H), 2.62 (s, 1H), 2.49–2.40 (m, 2H), 2.31 (d, *J* = 15.5 Hz, 1H), 2.12–2.05 (m, 1H), 1.96 (s, 1H), 1.77 (ddd, *J* = 13.9, 11.6, 5.6 Hz, 1H), 1.71 (dt, *J* = 14.7, 7.4 Hz, 1H), 1.50 (d, *J* = 14.5 Hz, 1H), 1.46–1.39 (m, 2H), 1.34 (d, *J* = 8.1 Hz, 2H), 1.23–1.16 (m, 1H), 0.93–0.84 (m, 6H); IR (neat) ν<sub>max</sub> 2922, 1729, 1503, 1459, 1230, 1094, 1071, 1036, 748, 693, 587, 530 cm<sup>-1</sup>; ESI-TOF HRMS *m/z* 768.4332 (M+H<sup>+</sup>, C<sub>44</sub>H<sub>57</sub>N<sub>5</sub>O<sub>7</sub> requires 768.4331).

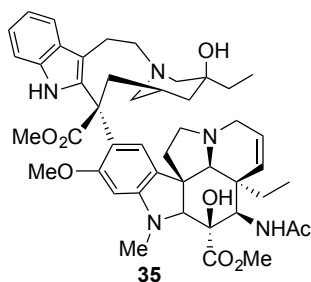

**Compound 35.** Compound **34** (1.5 mg, 1.95  $\mu\text{mol}$ ) was dissolved in 0.2 mL of anhydrous  $\text{CH}_2\text{Cl}_2$ . DMAP (0.5 mg, 4  $\mu\text{mol}$ ) and acetic anhydride (0.4 mg, 3.9  $\mu\text{mol}$ ) were added and the resulting mixture stirred for 30 min, then diluted with saturated aqueous  $\text{NaHCO}_3$  (2 mL). The mixture was extracted with 10%  $\text{MeOH}/\text{CH}_2\text{Cl}_2$  ( $4 \times 2$  mL). The combined organic extracts were dried ( $\text{Na}_2\text{SO}_4$ ) and concentrated under reduced pressure. The crude products were purified by PTLC ( $\text{SiO}_2$ , 95:5:3  $\text{EtOAc}/\text{MeOH}/\text{Et}_3\text{N}$ ) to give **35** (1.0 mg, 63%) as a white film:  $[\alpha]_D^{29} +21$  ( $c$  0.10,  $\text{CHCl}_3$ );  $^1\text{H NMR}$  (600 MHz,  $\text{CDCl}_3$ )  $\delta$  9.79 (s, 1H), 8.04 (s, 1H), 7.50 (d,  $J = 8.1$  Hz, 1H), 7.21–7.13 (m, 1H), 7.15–7.07 (m, 2H), 6.57 (d,  $J = 7.4$  Hz, 1H), 6.10 (s, 1H), 5.88 (d,  $J = 10.0$  Hz, 1H), 5.78 (ddd,  $J = 10.2, 4.7, 1.7$  Hz, 1H), 5.27 (dt,  $J = 10.1, 2.1$  Hz, 1H), 4.60 (d,  $J = 10.0$  Hz, 1H), 3.94 (t,  $J = 14.3$  Hz, 1H), 3.80 (s, 3H), 3.78 (s, 3H), 3.64 (s, 1H), 3.60 (s, 3H), 3.46 (d,  $J = 14.1$  Hz, 1H), 3.42–3.35 (m, 1H), 3.37–3.31 (m, 1H), 3.30–3.22 (m, 2H), 3.23–3.12 (m, 2H), 3.08 (s, 1H), 2.92–2.79 (m, 3H), 2.69 (s, 3H), 2.61 (s, 1H), 2.49 (d,  $J = 13.4$  Hz, 1H), 2.43 (td,  $J = 10.5, 6.4$  Hz, 1H), 2.32 (d,  $J = 15.1$  Hz, 1H), 2.19–2.09 (m, 1H), 1.97–1.95 (m, 4H), 1.91–1.83 (m, 1H), 1.86–1.77 (m, 1H), 1.52 (d,  $J = 14.1$  Hz, 1H), 1.48–1.40 (m, 1H), 1.39–1.29 (m, 3H), 0.90 (t,  $J = 7.5$  Hz, 3H), 0.79 (t,  $J = 7.4$  Hz, 3H); IR (neat)  $\nu_{\text{max}}$  3466, 2921, 2852, 1737, 1661, 1614, 1503, 1459, 1433, 1259, 1224, 1095, 1224, 1095, 1037, 1017, 802, 745  $\text{cm}^{-1}$ ; ESI-TOF HRMS  $m/z$  810.4438 ( $\text{M}+\text{H}^+$ ,  $\text{C}_{46}\text{H}_{59}\text{N}_5\text{O}_8$  requires 810.4436).

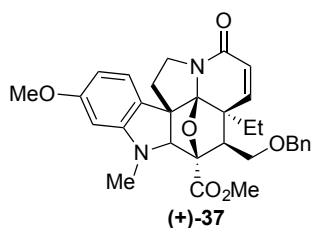

**Compound (+)-37.** A solution of **8d** (91 mg, 0.17 mmol) in THF (8.5 mL) was treated with LiHMDS (0.51 mL, 1.0 M in THF, 0.51 mmol) at  $-78$   $^\circ\text{C}$ . After stirring for 30 min, a solution of  $\text{PhSeCl}$  (59 mg, 0.31 mmol) in THF (1 mL) was added at  $-78$   $^\circ\text{C}$  and the mixture was stirred for 1 h at the same temperature before the reaction was quenched with the addition of water. The reaction mixture was extracted with  $\text{EtOAc}$  ( $3 \times 50$  mL), and dried over  $\text{Na}_2\text{SO}_4$  and evaporated to dryness. The crude residue in THF (5 mL) was treated with pyridine (0.1 mL) and *m*CPBA (37 mg, 0.215 mmol) at  $0$   $^\circ\text{C}$ , and slowly the temperature was warmed to room temperature over 2 h before the reaction was quenched with the addition of saturated aqueous  $\text{Na}_2\text{S}_2\text{O}_3$ . The reaction mixture was extracted with  $\text{CH}_2\text{Cl}_2$ , and dried with  $\text{Na}_2\text{SO}_4$ . The solvent was removed under vacuum. PTLC ( $\text{SiO}_2$ , 50%  $\text{EtOAc}/\text{hexanes}$ ) provided (+)-**37** (41 mg, 72%) as colorless foam. Chiral HPLC (chiralcel OD, 60:40 *i*PrOH/hexanes, 7 mL/min) allowed for



separation of the enantiomers of **37**:  $t_R$  (natural) = 20.2 min,  $t_R$  (unnatural) = 28.4 min. For (+)-**37**:  $[\alpha]_D^{25} +126$  ( $c$  1.0,  $\text{CHCl}_3$ );  $^1\text{H}$  NMR (500 MHz,  $\text{CDCl}_3$ )  $\delta$  7.28–7.23 (m, 2H), 7.22–7.17 (m, 3H), 6.82 (d,  $J$  = 8.1 Hz, 1H), 6.20 (d,  $J$  = 10.5 Hz, 1H), 6.11 (dd,  $J$  = 8.2, 2.2 Hz, 1H), 5.98 (d,  $J$  = 2.5 Hz, 1H), 5.91 (d,  $J$  = 10.0 Hz, 1H), 4.36 (s, 2H), 4.04 (s, 1H), 4.03 (t,  $J$  = 11.0 Hz, 1H), 3.84 (dt,  $J$  = 7.5, 11.0 Hz, 1H), 3.70 ((s, 3H), 3.64 (s, 3H), 3.57 (dd,  $J$  = 7.5, 9.0 Hz, 1H), 3.47 (dd,  $J$  = 6.5, 9.0 Hz, 1H), 2.94 (s, 3H), 2.87 (t,  $J$  = 6.5 Hz, 1H), 2.38 (q,  $J$  = 11.0 Hz, 1H), 2.12 (dd,  $J$  = 7.5, 13.0 Hz, 1H), 0.98 (dq,  $J$  = 14.5, 7.5 Hz, 1H), 0.80 (dq,  $J$  = 14.5, 7.0 Hz, 1H), 0.43 (t,  $J$  = 7.5 Hz, 3H);  $^{13}\text{C}$  NMR (125 MHz,  $\text{CDCl}_3$ )  $\delta$  170.4, 163.7, 161.8, 155.2, 144.7, 137.6, 128.4, 127.7, 127.4, 123.9, 123.8, 120.1, 105.0, 102.5, 94.3, 86.8, 83.4, 73.2, 67.9, 64.8, 55.4, 52.4, 51.2, 50.6, 46.5, 37.8, 35.4, 27.7, 8.9; IR (neat)  $\nu_{\text{max}}$  2978, 1733, 1677, 1611, 1499, 1414, 1371, 1235, 1095, 1042, 882, 825, 735, 637, 609  $\text{cm}^{-1}$ ; ESI-TOF HRMS  $m/z$  531.2491 ( $\text{M}+\text{H}^+$ ,  $\text{C}_{31}\text{H}_{34}\text{N}_2\text{O}_6$  requires 531.2490).

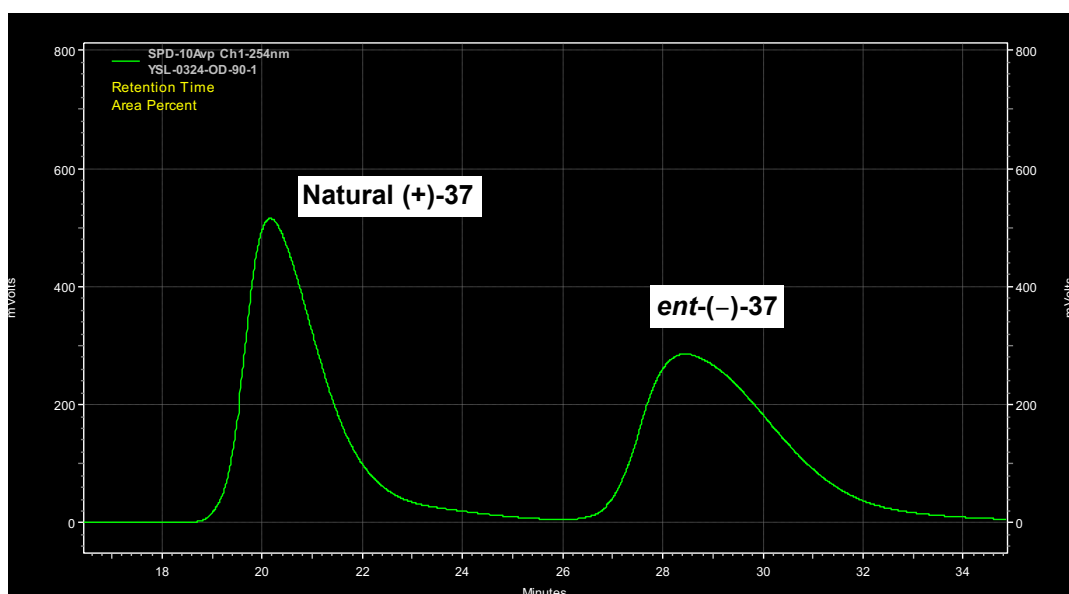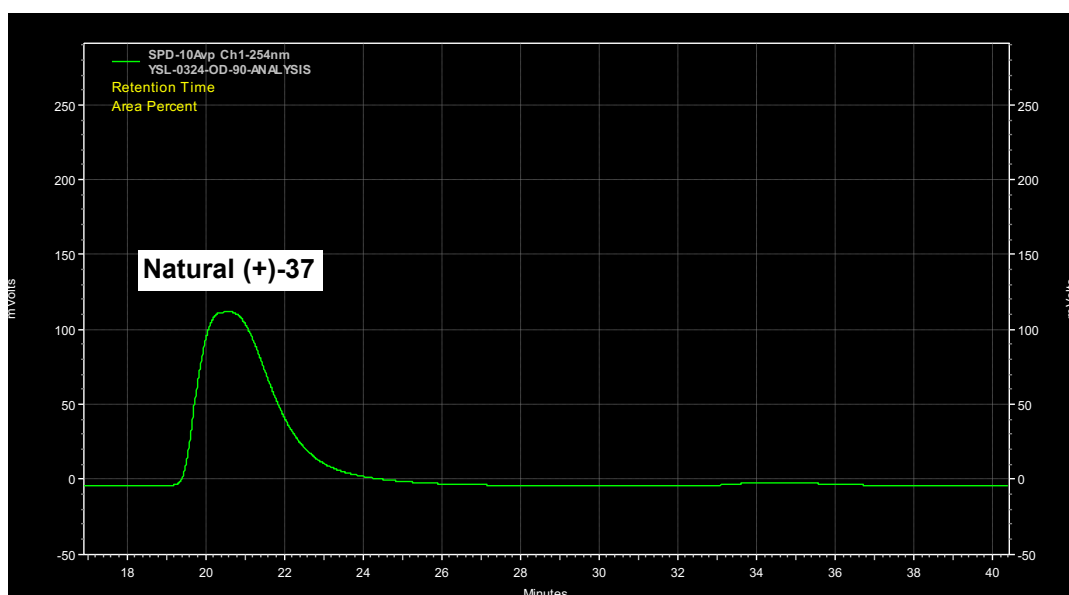

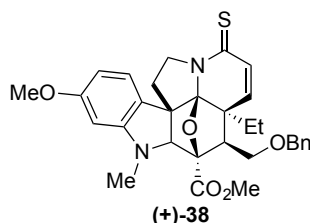

**Compound (+)-38.** A solution of (+)-**37** (28 mg, 0.053 mmol) in toluene (5 mL) was treated with Lawesson's reagent (21 mg, 0.053 mmol) and the solution was heated at 100°C for 1 h. After cooling the reaction mixture to room temperature, the solvent was removed under reduced pressure. The crude mixture was purified by PTLC (SiO<sub>2</sub>, 30% EtOAc/hexanes) to give (+)-**38** (26.5 mg, 92%) as a yellow oil:  $[\alpha]_D^{24} +392$  (*c* 1.0, CHCl<sub>3</sub>); <sup>1</sup>H NMR (500 MHz, CDCl<sub>3</sub>) δ 7.27–7.22 (m, 2H), 7.21–7.16 (m, 3H), 6.85 (d, *J* = 8.3 Hz, 1H), 6.40 (d, *J* = 9.8 Hz, 1H), 6.10 (dd, *J* = 8.2, 2.3 Hz, 1H), 5.99 (d, *J* = 2.2 Hz, 1H), 5.90 (d, *J* = 9.8 Hz, 1H), 4.37 (s, 2H), 4.33 (dd, *J* = 13.5, 9.5 Hz, 1H), 4.11–4.02 (m, 2H), 3.70 (s, 3H), 3.64 (s, 3H), 3.59 (dd, *J* = 9.3, 7.4 Hz, 1H), 3.49 (dd, *J* = 9.3, 6.4 Hz, 1H), 2.95 (s, 3H), 2.89 (t, *J* = 6.9 Hz, 1H), 2.44 (td, *J* = 11.9, 9.8 Hz, 1H), 2.17 (dd, *J* = 12.5, 7.3 Hz, 1H), 1.02 (dq, *J* = 15.0, 7.6 Hz, 1H), 0.81 (dq, *J* = 14.1, 7.0 Hz, 1H), 0.39 (t, *J* = 7.3 Hz, 3H); <sup>13</sup>C NMR (125 MHz, CDCl<sub>3</sub>) δ 190.7, 169.9, 161.8, 155.1, 137.5, 136.1, 130.8, 128.4 (2C), 127.7, 127.3 (2C), 123.8, 119.7, 102.6 (2C), 94.3, 86.8, 83.4, 73.1, 67.7, 65.4, 55.4, 53.0, 52.4, 51.6, 50.5, 37.3, 35.4, 27.7, 8.7; IR (neat)  $\nu_{\max}$  2949, 1734, 1610, 1499, 1431, 1200, 1101, 1051 cm<sup>-1</sup>; ESI-TOF HRMS *m/z* 547.2267 (M+H<sup>+</sup>, C<sub>31</sub>H<sub>34</sub>N<sub>2</sub>O<sub>5</sub>S requires 547.2261).

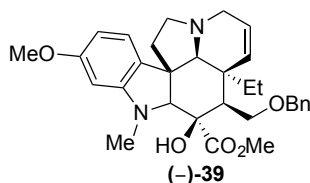

**Compound (-)-39.** A solution of (+)-**38** (17 mg, 0.031 mmol) in CH<sub>2</sub>Cl<sub>2</sub> (1 mL) was treated with Me<sub>3</sub>OBf<sub>4</sub> (9.2 mg, 0.062 mmol) at 0 °C. The reaction mixture was allowed to warm to room temperature over 1 h and the solvent was removed under a stream of nitrogen. The residue was dissolved in a mixture of MeOH (1 mL) and TFE (1 mL), cooled to 0 °C and treated with NaBH<sub>4</sub> (2.3 mg, 0.062 mmol). After two more additions of NaBH<sub>4</sub> in 15 min intervals, the reaction was quenched by the addition of saturated aqueous NaHCO<sub>3</sub> (2 mL). The aqueous phase was extracted with CH<sub>2</sub>Cl<sub>2</sub> (4 × 10 mL). The combined organic phase was washed with saturated aqueous NaCl and dried over Na<sub>2</sub>SO<sub>4</sub>. The solvent was removed under vacuum and the residue was purified by PTLC (SiO<sub>2</sub>, 5% MeOH/CH<sub>2</sub>Cl<sub>2</sub>) to afford (-)-**39** (11 mg, 71%):  $[\alpha]_D^{24} -7.7$  (*c* 1.0, CHCl<sub>3</sub>); <sup>1</sup>H NMR (500 MHz, CDCl<sub>3</sub>) δ 8.91 (s, 1H), 7.33–7.27 (m, 4H), 7.25–7.20 (m, 1H), 6.90 (d, *J* = 8.2 Hz, 1H), 6.29 (dd, *J* = 8.1, 2.2 Hz, 1H), 6.08 (d, *J* = 2.2 Hz, 1H), 5.77–5.64 (m, 2H), 4.50–4.39 (m, 2H), 3.77 (s, 3H), 3.76 (s, 3H), 3.73 (d, *J* = 9.9 Hz, 1H), 3.53–3.43 (m, 3H), 3.40–3.32 (m, 1H), 2.79 (dt, *J* = 16.3, 2.2 Hz, 1H), 2.66 (s, 3H), 2.61 (dd, *J* = 9.5, 2.6 Hz, 1H), 2.53 (s, 1H), 2.44 (q, *J* = 9.4 Hz, 1H), 2.36–2.26 (m, 2H),

1.45 (dq,  $J = 14.9, 7.5$  Hz, 1H), 1.09 (dq,  $J = 14.4, 7.3$  Hz, 1H), 0.45 (t,  $J = 7.3$  Hz, 3H);  $^{13}\text{C}$  NMR (125 MHz,  $\text{CDCl}_3$ )  $\delta$  174.3, 161.0, 154.6, 138.9, 133.7, 128.2 (2C), 127.5 (2C), 127.2, 126.6, 123.7, 122.8, 104.4, 96.1, 83.9, 79.6, 72.3, 72.1, 68.0, 55.4, 53.2, 52.4, 52.3, 44.8, 44.4, 41.7, 39.6, 34.1, 8.4; IR (neat)  $\nu_{\text{max}}$  2949, 2873, 1732, 1614, 1499, 1453, 1222, 1085, 1046  $\text{cm}^{-1}$ ; ESI-TOF HRMS  $m/z$  519.2851 ( $\text{M}+\text{H}^+$ ,  $\text{C}_{31}\text{H}_{38}\text{N}_2\text{O}_5$  requires 519.2853). The structure and the absolute configuration of (–)-**39** were unambiguously established with a single crystal X-ray structure determination conducted on a white needle crystal obtained from vapor diffusion of hexane into a EtOAc solution of (–)-**39** (CCDC 1475227).

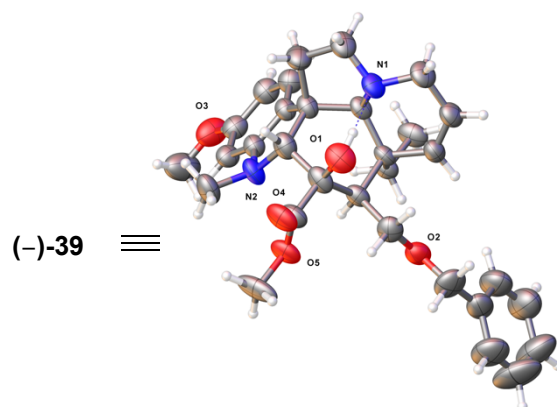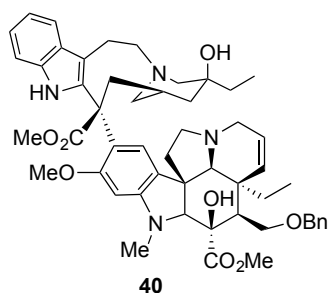

**Compound 40.** (–)-**39** (7 mg, 13.5  $\mu\text{mol}$ ) and catharanthine sulfate (11.7 mg, 26.9  $\mu\text{mol}$ ) were combined with TFE (56  $\mu\text{L}$ ), aqueous 0.1 N HCl (0.28 mL) and  $\text{H}_2\text{O}$  (0.28 mL) in a 2-dram vial. The vial was fitted with a rubber septum and flushed with Ar.  $\text{FeCl}_3 \cdot 6\text{H}_2\text{O}$  (18.2 mg, 67  $\mu\text{mol}$ ) was added producing a bright yellow precipitate. The reaction mixture was stirred for 2 h at 25  $^\circ\text{C}$ . Meanwhile, in a separate flask,  $\text{Fe}_2(\text{ox})_3 \cdot 6\text{H}_2\text{O}$  (67 mg, 0.138 mmol) in  $\text{H}_2\text{O}$  (55 mL) was stirred for 2 h, by which time the  $\text{Fe}_2(\text{ox})_3 \cdot 6\text{H}_2\text{O}$  was completely dissolved. This mixture was cooled to 0  $^\circ\text{C}$  and air was bubbled vigorously through the solution for 15–20 min. The  $\text{FeCl}_3$  coupling mixture was transferred to the  $\text{Fe}_2(\text{ox})_3/\text{O}_2$  solution by pipette, then  $\text{NaBH}_4$  (10.3 mg, 0.27 mmol) was added as a solution in water (0.5 mL). After stirring for 30 min, the reaction was quenched by the addition of aqueous  $\text{NH}_4\text{OH}$  (2 mL) and the resulting mixture was extracted with 10% MeOH/ $\text{CH}_2\text{Cl}_2$  ( $4 \times 50$  mL). The combined organic extracts were dried ( $\text{Na}_2\text{SO}_4$ ) and concentrated under reduced pressure. PTLC ( $\text{SiO}_2$ , 95:5:3 EtOAc/MeOH/ $\text{Et}_3\text{N}$ ) gave **40** (2.3 mg, 19%) as a white film, along with the

corresponding leurosidine analogue (1.9 mg, 16%) and anhydrovinblastine analogue (1.0 mg, 10%) also as white films:  $[\alpha]_{\text{D}}^{22} +30$  ( $c$  0.80,  $\text{CHCl}_3$ );  $^1\text{H NMR}$  (600 MHz,  $\text{CDCl}_3$ )  $\delta$  9.31 (s, 1H), 8.07 (s, 1H), 7.52 (d,  $J = 7.8$  Hz, 1H), 7.36–7.31 (m, 4H), 7.29–7.26 (m, 1H), 7.16 (t,  $J = 7.4$  Hz, 1H), 7.14–7.07 (m, 2H), 6.62 (s, 1H), 6.12 (s, 1H), 5.78–5.72 (m, 1H), 5.72–5.67 (m, 1H), 4.52–4.44 (m, 2H), 3.95 (t,  $J = 14.2$  Hz, 1H), 3.78 (s, 3H), 3.77 (s, 3H), 3.59 (s, 3H), 3.52 (dd,  $J = 10.0, 2.5$  Hz, 1H), 3.48 (s, 1H), 3.34 (dd,  $J = 16.6, 4.4$  Hz, 1H), 3.23 (td,  $J = 9.5, 4.6$  Hz, 1H), 3.15 (d,  $J = 14.7$  Hz, 1H), 2.88–2.76 (m, 2H), 2.69 (s, 3H), 2.60–2.53 (m, 2H), 2.43 (s, 1H), 2.36 (q,  $J = 10.1$  Hz, 1H), 2.30 (d,  $J = 15.0$  Hz, 1H), 2.17–2.06 (m, 1H), 1.88 (ddd,  $J = 13.7, 11.0, 4.6$  Hz, 1H), 1.68 (dq,  $J = 14.5, 7.3$  Hz, 1H), 1.52–1.46 (m, 1H), 1.46–1.39 (m, 1H), 1.33 (d,  $J = 8.2$  Hz, 2H), 1.28–1.19 (m, 1H), 0.89 (t,  $J = 7.5$  Hz, 3H), 0.82 (t,  $J = 7.3$  Hz, 3H); IR (neat)  $\nu_{\text{max}}$  3467, 2962, 2928, 2874, 1735, 1614, 1529, 1458, 1379, 1223, 1156, 1088, 1066, 745  $\text{cm}^{-1}$ ; ESI-TOF HRMS  $m/z$  873.4792 ( $\text{M}+\text{H}^+$ ,  $\text{C}_{52}\text{H}_{64}\text{N}_4\text{O}_8$  requires 873.4797).

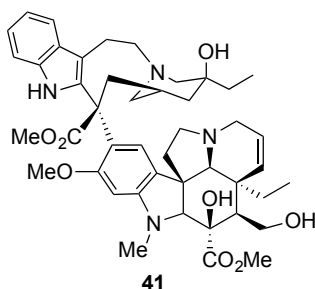

**Compound 41.** A solution of **40** (5 mg, 5.7  $\mu\text{mol}$ ) in MeOH (0.5 mL) was treated with  $\text{CF}_3\text{COOH}$  (0.01 mL) and Pd/C (1 mg, 10% on activated carbon, reduced dry powder) under Ar. The reaction mixture was degassed with hydrogen and stirred for 12 h under the atmosphere of hydrogen before the addition of saturated aqueous  $\text{NaHCO}_3$ . The resulting mixture was extracted with 10% MeOH/ $\text{CH}_2\text{Cl}_2$  ( $4 \times 2$  mL). The combined organic extracts were dried ( $\text{Na}_2\text{SO}_4$ ) and concentrated under reduced pressure. PTLC ( $\text{SiO}_2$ , 95:5:3 EtOAc/MeOH/ $\text{Et}_3\text{N}$ ) gave **41** (3.2 mg, 71%) as a white film:  $[\alpha]_{\text{D}}^{25} +49$  ( $c$  0.46,  $\text{CHCl}_3$ );  $^1\text{H NMR}$  (600 MHz,  $\text{CDCl}_3$ )  $\delta$  10.02 (s, 1H), 8.05 (s, 1H), 7.52 (d,  $J = 7.9$  Hz, 1H), 7.22–7.08 (m, 3H), 6.62 (s, 1H), 6.11 (s, 1H), 5.81 (ddd,  $J = 10.2, 4.6, 1.7$  Hz, 1H), 5.73 (dt,  $J = 10.1, 2.0$  Hz, 1H), 4.13–4.05 (m, 1H), 3.95 (t,  $J = 14.2$  Hz, 1H), 3.90–3.81 (m, 4H), 3.78 (s, 3H), 3.59 (s, 3H), 3.49 (s, 1H), 3.40 (d,  $J = 13.8$  Hz, 1H), 3.32 (ddd,  $J = 16.0, 4.7, 1.7$  Hz, 2H), 3.30–3.22 (m, 2H), 3.14 (d,  $J = 13.9$  Hz, 2H), 2.90–2.77 (m, 3H), 2.72 (s, 3H), 2.64 (s, 1H), 2.50–2.36 (m, 2H), 2.35–2.25 (m, 1H), 2.18 (dd,  $J = 5.7, 2.3$  Hz, 1H), 2.07 (ddd,  $J = 14.4, 9.1, 5.8$  Hz, 1H), 1.80 (ddd,  $J = 13.6, 11.4, 5.5$  Hz, 1H), 1.58–1.50 (m, 1H), 1.48 (d,  $J = 14.7$  Hz, 1H), 1.41 (dd,  $J = 14.3, 6.1$  Hz, 1H), 1.32 (q,  $J = 7.5$  Hz, 2H), 0.88 (q,  $J = 7.7$  Hz, 6H); IR (neat)  $\nu_{\text{max}}$  3469, 2928, 2874, 1731, 1614, 1503, 1458, 1432, 1224, 1009, 746, 588  $\text{cm}^{-1}$ ; ESI-TOF HRMS  $m/z$  783.4317 ( $\text{M}+\text{H}^+$ ,  $\text{C}_{45}\text{H}_{58}\text{N}_4\text{O}_8$  requires 783.4327).

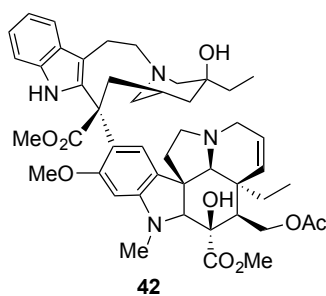

**Compound 42.** A solution of **41** (1.4 mg, 1.8  $\mu\text{mol}$ ) in anhydrous  $\text{CH}_2\text{Cl}_2$  (0.2 mL) was treated with DMAP (0.4 mg, 3.6  $\mu\text{mol}$ ) and acetic anhydride (0.4 mg, 3.9  $\mu\text{mol}$ ). The resulting mixture was stirred for 30 min before the reaction was quenched with the addition of saturated aqueous  $\text{NaHCO}_3$  (2 mL). The mixture was extracted with 10%  $\text{MeOH}/\text{CH}_2\text{Cl}_2$  ( $4 \times 2$  mL) and the combined organic extracts were dried ( $\text{Na}_2\text{SO}_4$ ) and concentrated under reduced pressure. PTLC ( $\text{SiO}_2$ , 95:5:3  $\text{EtOAc}/\text{MeOH}/\text{Et}_3\text{N}$ ) provided **42** (0.8 mg, 54%) as a white film:  $[\alpha]_{\text{D}}^{23} +48$  ( $c$  0.13,  $\text{CHCl}_3$ );  $^1\text{H}$  NMR (600 MHz,  $\text{CDCl}_3$ )  $\delta$  9.27 (s, 1H), 8.06 (s, 1H), 7.51 (d,  $J = 7.8$  Hz, 1H), 7.21–7.08 (m, 3H), 6.12 (s, 1H), 5.81 (dd,  $J = 10.7, 4.1$  Hz, 1H), 5.46 (dt,  $J = 10.2, 2.1$  Hz, 1H), 4.33–4.19 (m, 2H), 3.92 (t,  $J = 15.6$  Hz, 1H), 3.84 (s, 3H), 3.78 (s, 3H), 3.60 (s, 3H), 3.51 (s, 1H), 3.41–3.34 (m, 1H), 3.29 (td,  $J = 7.1, 5.4$  Hz, 1H), 3.24 (td,  $J = 9.6, 4.6$  Hz, 1H), 3.21–3.11 (m, 1H), 2.89–2.77 (m, 2H), 2.69 (s, 3H), 2.56 (d,  $J = 9.4$  Hz, 1H), 2.53 (s, 1H), 2.41–2.28 (m, 2H), 2.19–2.11 (m, 1H), 2.06 (s, 3H), 1.90 (ddd,  $J = 13.8, 11.0, 4.5$  Hz, 1H), 1.53 (dt,  $J = 14.2, 7.3$  Hz, 1H), 1.40 (t,  $J = 7.3$  Hz, 1H), 1.38–1.32 (m, 2H), 0.91 (t,  $J = 7.3$  Hz, 3H), 0.82 (t,  $J = 7.3$  Hz, 3H); IR (neat)  $\nu_{\text{max}}$  2925, 1731, 1614, 1501, 1459, 1432, 1223, 1142, 1040, 797, 745, 677, 666  $\text{cm}^{-1}$ ; ESI-TOF HRMS  $m/z$  825.4437 ( $\text{M}+\text{H}^+$ ,  $\text{C}_{47}\text{H}_{60}\text{N}_4\text{O}_9$  requires 825.4433).

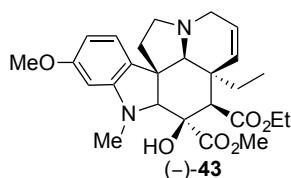

**Compound (-)-43.** Morpholine (9.4  $\mu\text{L}$ , 109  $\mu\text{mol}$ ) and  $\text{Pd}(\text{PPh}_3)_4$  (1.3 mg, 1.1  $\mu\text{mol}$ ) were added to a mixture of **(-)-23** (5.3 mg, 10.6  $\mu\text{mol}$ ) in THF (0.5 mL) and DMSO (50  $\mu\text{L}$ ). After stirring for 1 h, the solvent was removed under a stream of  $\text{N}_2$ . DMF (0.3 mL) was added followed by CsF (3.2 mg, 21.2  $\mu\text{mol}$ ), EtI (1.7  $\mu\text{L}$ , 21.2  $\mu\text{mol}$ ). The mixture was stirred at room temperature for 1 h before the addition of saturated aqueous  $\text{NaHCO}_3$  (2 mL). The reaction was extracted with  $\text{EtOAc}$  ( $4 \times 2$  mL). The organic layer was dried ( $\text{Na}_2\text{SO}_4$ ) and concentrated under reduced pressure. PTLC ( $\text{SiO}_2$ , 50% hexanes/acetone) gave **43** (3.2 mg, 62%) as a white solid:  $[\alpha]_{\text{D}}^{23} -4$  ( $c$  0.36,  $\text{CHCl}_3$ );  $^1\text{H}$  NMR (600 MHz,  $\text{CDCl}_3$ )  $\delta$  9.48 (s, 1H), 6.88 (d,  $J = 8.1$  Hz, 1H), 6.27 (dd,  $J = 8.2, 2.0$  Hz, 1H), 6.04 (s, 1H), 5.89–5.82 (m, 1H), 5.18 (d,  $J = 10.0$  Hz, 1H), 4.27–4.19 (m, 1H), 4.17–4.07 (m, 1H), 3.78 (s, 3H), 3.77 (s, 3H), 3.65 (s, 1H), 3.51–3.37 (m, 2H), 3.06 (s, 1H), 2.82 (d,  $J = 16.3$  Hz, 1H), 2.76 (s, 1H), 2.67 (s, 3H), 2.60–2.50 (m, 1H), 2.34–2.21 (m, 2H), 1.81 (ddd,  $J = 14.4, 7.2, 1.9$  Hz, 1H), 1.24 (t,  $J = 7.1$  Hz, 3H), 1.04–0.95 (m, 1H), 0.59 (t,  $J = 7.3$  Hz, 3H);  $^{13}\text{C}$  NMR (151 MHz,  $\text{CDCl}_3$ )  $\delta$  173.5, 172.1, 161.1, 153.7,

131.2, 124.9, 124.8, 122.6, 104.3, 95.6, 83.0, 78.5, 65.7, 60.1, 55.3, 53.3, 52.2, 51.7, 51.2, 50.7, 44.6, 40.8, 38.4, 32.0, 14.2, 8.0; IR (neat)  $\nu_{\max}$  2926, 1732, 1613, 1501, 1452, 1434, 1331, 1245, 1167, 1085, 1028, 819, 747  $\text{cm}^{-1}$ ; ESI-TOF HRMS  $m/z$  471.2489 ( $\text{M}+\text{H}^+$ ,  $\text{C}_{26}\text{H}_{34}\text{N}_2\text{O}_6$  requires 471.2490).

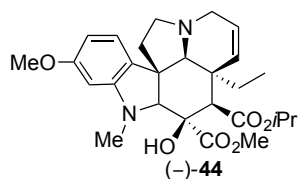

**Compound (-)-44.** Morpholine (9.0  $\mu\text{L}$ , 104  $\mu\text{mol}$ ) and  $\text{Pd}(\text{PPh}_3)_4$  (1.2 mg, 1.0  $\mu\text{mol}$ ) were added to a mixture of (-)-**23** (5.0 mg, 10.4  $\mu\text{mol}$ ) in THF (0.5 mL) and DMSO (50  $\mu\text{L}$ ). After stirring for 1 h, the solvent was removed under a stream of  $\text{N}_2$ . DMF (0.3 mL) was added followed by CsF (3.2 mg, 20.8  $\mu\text{mol}$ ), *i*PrI (2.1  $\mu\text{L}$ , 20.8  $\mu\text{mol}$ ). The mixture was stirred at room temperature for 1 h before the addition of saturated aqueous  $\text{NaHCO}_3$  (2 mL). The reaction was extracted with EtOAc ( $4 \times 2$  mL). The organic layer was dried ( $\text{Na}_2\text{SO}_4$ ) and concentrated under reduced pressure. PTLC ( $\text{SiO}_2$ , 50% hexanes/acetone) gave **44** (3.0 mg, 60%) as a white solid:  $[\alpha]_{\text{D}}^{23} -7.5$  (*c* 0.50,  $\text{CHCl}_3$ );  $^1\text{H}$  NMR (600 MHz,  $\text{CDCl}_3$ )  $\delta$  9.39 (s, 1H), 6.87 (d,  $J = 8.2$  Hz, 1H), 6.26 (dd,  $J = 8.2, 2.3$  Hz, 1H), 6.04 (d,  $J = 2.3$  Hz, 1H), 5.83 (ddd,  $J = 10.1, 5.2, 1.6$  Hz, 1H), 5.20 (dt,  $J = 10.0, 2.0$  Hz, 1H), 5.02 (p,  $J = 6.3$  Hz, 1H), 3.77 (d,  $J = 1.4$  Hz, 6H), 3.62 (s, 1H), 3.47–3.42 (m, 1H), 3.39 (td,  $J = 9.3, 4.6$  Hz, 1H), 3.01 (s, 1H), 2.82–2.76 (m, 1H), 2.73 (s, 1H), 2.67 (s, 3H), 2.52 (td,  $J = 10.4, 7.3$  Hz, 1H), 2.32–2.19 (m, 2H), 1.81 (dq,  $J = 14.7, 7.1$  Hz, 1H), 1.23 (d,  $J = 6.3$  Hz, 3H), 1.21 (d,  $J = 6.3$  Hz, 3H), 0.98 (dq,  $J = 14.5, 7.2$  Hz, 1H), 0.58 (t,  $J = 7.3$  Hz, 3H);  $^{13}\text{C}$  NMR (151 MHz,  $\text{CDCl}_3$ )  $\delta$  173.5, 171.5, 161.0, 153.7, 131.2, 125.1, 124.7, 122.6, 104.2, 95.5, 83.1, 78.5, 67.4, 65.7, 55.3, 53.2, 52.1, 51.6, 51.2, 50.7, 44.6, 40.8, 38.4, 32.1, 21.8, 21.7, 8.0; IR (neat)  $\nu_{\max}$  2969, 1734, 1613, 1502, 1454, 1247, 1173, 1142, 1108, 1087, 1042, 752  $\text{cm}^{-1}$ ; ESI-TOF HRMS  $m/z$  485.2647 ( $\text{M}+\text{H}^+$ ,  $\text{C}_{27}\text{H}_{36}\text{N}_2\text{O}_6$  requires 485.2646).

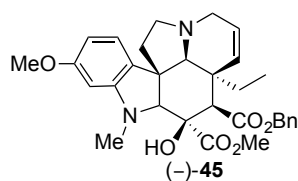

**Compound (-)-45.** Morpholine (9.4  $\mu\text{L}$ , 109  $\mu\text{mol}$ ) and  $\text{Pd}(\text{PPh}_3)_4$  (1.3 mg, 1.1  $\mu\text{mol}$ ) were added to a mixture of (-)-**23** (5.3 mg, 10.6  $\mu\text{mol}$ ) in THF (0.5 mL) and DMSO (50  $\mu\text{L}$ ). After stirring for 1 h, the solvent was removed under a stream of  $\text{N}_2$ . DMF (0.3 mL) was added followed by CsF (3.2 mg, 21.2  $\mu\text{mol}$ ), BnBr (2.5  $\mu\text{L}$ , 21.2  $\mu\text{mol}$ ). The mixture was stirred at room temperature for 1 h before the addition of saturated aqueous  $\text{NaHCO}_3$  (2 mL). The reaction was extracted with EtOAc ( $4 \times 2$  mL). The organic layer was dried ( $\text{Na}_2\text{SO}_4$ ) and concentrated under reduced pressure. PTLC ( $\text{SiO}_2$ , 50% hexanes/acetone) gave **45** (4.7 mg, 80%) as a white solid:  $[\alpha]_{\text{D}}^{23} -17$  (*c* 0.5,  $\text{CHCl}_3$ );  $^1\text{H}$  NMR (600 MHz,  $\text{CDCl}_3$ )  $\delta$  9.50 (s, 1H), 7.40–7.36 (m, 2H), 7.35–7.29 (m, 2H), 7.29–7.27 (m, 1H), 6.86 (d,  $J = 8.2$  Hz, 1H), 6.26 (dd,  $J = 8.1, 2.2$  Hz, 1H), 6.03 (d,  $J = 2.3$  Hz, 1H), 5.76 (ddd,  $J = 10.1, 5.1, 1.6$  Hz, 1H), 5.25 (d,  $J = 12.4$  Hz, 1H), 5.05 (d,  $J =$

12.4 Hz, 1H), 5.01 (ddd,  $J = 10.1, 2.6, 1.5$  Hz, 1H), 3.76 (s, 3H), 3.65–3.61 (m, 4H), 3.46–3.35 (m, 2H), 3.12 (s, 1H), 2.79 (dt,  $J = 16.0, 2.1$  Hz, 1H), 2.71 (s, 1H), 2.65 (s, 3H), 2.53 (td,  $J = 10.4, 7.2$  Hz, 1H), 2.33–2.20 (m, 2H), 1.78 (dq,  $J = 14.7, 7.4$  Hz, 1H), 0.97 (dq,  $J = 14.5, 7.3$  Hz, 1H), 0.54 (t,  $J = 7.3$  Hz, 3H);  $^{13}\text{C}$  NMR (151 MHz,  $\text{CDCl}_3$ )  $\delta$  173.4, 171.9, 161.0, 153.6, 136.0, 131.0, 128.6, 128.3, 127.9, 124.9, 124.8, 122.6, 104.3, 95.5, 83.0, 78.4, 65.8, 65.7, 55.3, 53.2, 52.1, 51.7, 51.2, 50.7, 44.5, 40.9, 38.4, 32.0, 7.9; IR (neat)  $\nu_{\text{max}}$  2956, 1733, 1614, 1501, 1458, 1249, 1167, 1086, 1043, 750  $\text{cm}^{-1}$ ; ESI-TOF HRMS  $m/z$  533.2647 ( $\text{M}+\text{H}^+$ ,  $\text{C}_{31}\text{H}_{36}\text{N}_2\text{O}_6$  requires 533.2646).

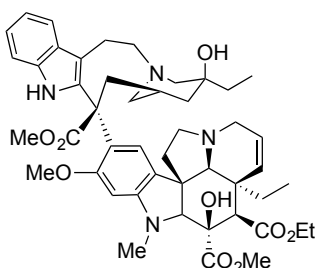

46

**Compound 46.** (–)-**43** (3.2 mg, 6.8  $\mu\text{mol}$ ) and catharanthine sulfate (3.0 mg, 6.90  $\mu\text{mol}$ ) were combined with TFE (35  $\mu\text{L}$ ), aqueous 0.1 N HCl (0.18 mL) and water (0.18 mL) in a 2-dram vial. The vial was fitted with a rubber septum and flushed with Ar.  $\text{FeCl}_3 \cdot 6\text{H}_2\text{O}$  (9 mg, 33.3  $\mu\text{mol}$ ) was added producing a bright yellow precipitate. The mixture was stirred for 2 h during which time the precipitate re-dissolved leaving a clear, yellow solution. Meanwhile, a suspension of  $\text{Fe}_2(\text{ox})_3 \cdot 6\text{H}_2\text{O}$  (33.2 mg, 68.6  $\mu\text{mol}$ ) in water (30 mL) was stirred for 2 h, by which time the  $\text{Fe}_2(\text{ox})_3 \cdot 6\text{H}_2\text{O}$  was completely dissolved. This mixture was cooled to 0  $^\circ\text{C}$  and air was bubbled vigorously through the solution for 15–20 min. The  $\text{FeCl}_3$  coupling mixture was transferred to the  $\text{Fe}_2(\text{ox})_3/\text{O}_2$  solution by pipette, then  $\text{NaBH}_4$  (5.2 mg, 163  $\mu\text{mol}$ ) was added as a solution in water (0.3 mL). After stirring for 30 min, the reaction was quenched by the addition of aqueous  $\text{NH}_4\text{OH}$  (5 mL) and the resulting mixture was extracted with 10% MeOH/ $\text{CH}_2\text{Cl}_2$  (4  $\times$  30 mL). The combined organic extracts were dried ( $\text{Na}_2\text{SO}_4$ ) and concentrated under reduced pressure. PTLC ( $\text{SiO}_2$ , 97:3:3 EtOAc/MeOH/ $\text{Et}_3\text{N}$ ) gave **46** (1.8 mg, 32%) as a colorless film, along with the corresponding leurosidine analogue (1.1 mg, 20%) and anhydrovinblastine analogue (0.9 mg, 17%) also as colorless films. For **46**:  $[\alpha]_{\text{D}}^{21} +44$  ( $c$  0.18,  $\text{CHCl}_3$ );  $^1\text{H}$  NMR (600 MHz,  $\text{CDCl}_3$ )  $\delta$  9.71 (s, 1H), 8.05 (s, 1H), 7.51 (d,  $J = 8.0$  Hz, 1H), 7.21–7.07 (m, 3H), 6.60 (s, 1H), 6.08 (d,  $J = 1.5$  Hz, 1H), 5.83 (dd,  $J = 10.3, 5.0$  Hz, 1H), 5.24–5.13 (m, 1H), 4.34–4.22 (m, 1H), 4.22–4.11 (m, 1H), 3.94 (t,  $J = 14.3$  Hz, 1H), 3.79 (s, 3H), 3.78 (s, 3H), 3.65–3.59 (m, 4H), 3.50–3.40 (m, 1H), 3.37–3.30 (m, 2H), 3.30–3.22 (m, 2H), 3.22–3.12 (m, 1H), 3.07 (s, 1H), 2.86 (s, 1H), 2.79 (d,  $J = 16.2$  Hz, 1H), 2.76–2.65 (m, 5H), 2.51–2.42 (m, 2H), 2.31 (d,  $J = 15.1$  Hz, 1H), 2.14 (dt,  $J = 14.9, 8.1$  Hz, 1H), 2.02 (dq,  $J = 14.7, 7.5$  Hz, 1H), 1.81 (td,  $J = 12.5, 5.0$  Hz, 1H), 1.56–1.47 (m, 1H), 1.47–1.39 (m, 1H), 1.34 (s, 2H), 1.33–1.22 (m, 5H), 0.93–0.82 (m, 6H); IR (neat)  $\nu_{\text{max}}$  2928, 1729, 1665, 1613, 1503, 1459, 1432, 1333, 1256, 1178, 1143, 1093, 1021, 802, 745  $\text{cm}^{-1}$ ; ESI-TOF HRMS  $m/z$  825.4421 ( $\text{M}+\text{H}^+$ ,  $\text{C}_{47}\text{H}_{60}\text{N}_4\text{O}_9$  requires 825.4433).

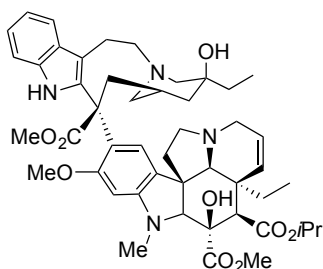

47

**Compound 47.** (–)-**44** (3 mg, 6.2  $\mu\text{mol}$ ) and catharanthine sulfate (2.7 mg, 6.2  $\mu\text{mol}$ ) were combined with TFE (32  $\mu\text{L}$ ), aqueous 0.1 N HCl (0.16 mL) and water (0.16 mL) in a 2-dram vial. The vial was fitted with a rubber septum and flushed with Ar.  $\text{FeCl}_3 \cdot 6\text{H}_2\text{O}$  (8.4 mg, 31.1  $\mu\text{mol}$ ) was added producing a bright yellow precipitate. The mixture was stirred for 2 h during which time the precipitate re-dissolved leaving a clear, yellow solution. Meanwhile, a suspension of  $\text{Fe}_2(\text{ox})_3 \cdot 6\text{H}_2\text{O}$  (30.2 mg, 62.4  $\mu\text{mol}$ ) in water (27 mL) was stirred for 2 h, by which time the  $\text{Fe}_2(\text{ox})_3 \cdot 6\text{H}_2\text{O}$  was completely dissolved. This mixture was cooled to 0  $^\circ\text{C}$  and air was bubbled vigorously through the solution for 15–20 min. The  $\text{FeCl}_3$  coupling mixture was transferred to the  $\text{Fe}_2(\text{ox})_3/\text{O}_2$  solution by pipette, then  $\text{NaBH}_4$  (4 mg, 126  $\mu\text{mol}$ ) was added as a solution in water (0.3 mL). After stirring for 30 min, the reaction was quenched by the addition of aqueous  $\text{NH}_4\text{OH}$  (5 mL) and the resulting mixture was extracted with 10% MeOH/ $\text{CH}_2\text{Cl}_2$  (4  $\times$  30 mL). The combined organic extracts were dried ( $\text{Na}_2\text{SO}_4$ ) and concentrated under reduced pressure. PTLC ( $\text{SiO}_2$ , 97:3:3 EtOAc/MeOH/ $\text{Et}_3\text{N}$ ) gave **47** (1.6 mg, 30%) as a colorless film, along with the corresponding leurosidine analogue (0.9 mg, 18%) and anhydrovinblastine analogue (0.8 mg, 15%) also as colorless films. For **47**:  $[\alpha]_{\text{D}}^{23} +34$  (*c* 0.20,  $\text{CHCl}_3$ );  $^1\text{H NMR}$  (600 MHz,  $\text{CDCl}_3$ )  $\delta$  9.66 (s, 1H), 8.05 (s, 1H), 7.51 (d,  $J = 7.9$  Hz, 1H), 7.20–7.08 (m, 3H), 6.59 (s, 1H), 6.09 (s, 1H), 5.81 (ddd,  $J = 10.2, 5.1, 1.6$  Hz, 1H), 5.20 (d,  $J = 10.1$  Hz, 1H), 5.07 (p,  $J = 6.3$  Hz, 1H), 3.94 (t,  $J = 14.1$  Hz, 1H), 3.78 (s, 6H), 3.72 (d,  $J = 5.9$  Hz, 1H), 3.63–3.58 (m, 4H), 3.51–3.43 (m, 1H), 3.43–3.35 (m, 1H), 3.34–3.27 (m, 2H), 3.27–3.21 (m, 2H), 3.21–3.12 (m, 2H), 3.03 (s, 1H), 2.93–2.83 (m, 2H), 2.79 (d,  $J = 16.0$  Hz, 1H), 2.72–2.65 (m, 4H), 2.54–2.47 (m, 1H), 2.44 (td,  $J = 10.5, 5.9$  Hz, 1H), 2.31 (d,  $J = 15.5$  Hz, 1H), 2.18–2.09 (m, 1H), 2.07–1.99 (m, 1H), 1.80 (ddd,  $J = 13.8, 11.4, 5.0$  Hz, 1H), 1.54–1.46 (m, 1H), 1.43 (dt,  $J = 14.4, 7.3$  Hz, 1H), 1.39–1.31 (m, 2H), 1.27 (d,  $J = 6.3$  Hz, 3H), 1.25 (d,  $J = 6.3$  Hz, 4H), 0.88 (dt,  $J = 11.7, 7.4$  Hz, 6H); IR (neat)  $\nu_{\text{max}}$  2963, 1732, 1614, 1504, 1460, 1433, 1249, 1181, 1143, 1107, 1039, 806, 749  $\text{cm}^{-1}$ ; ESI-TOF HRMS  $m/z$  839.4590 ( $\text{M}+\text{H}^+$ ,  $\text{C}_{48}\text{H}_{62}\text{N}_4\text{O}_9$  requires 839.4589).

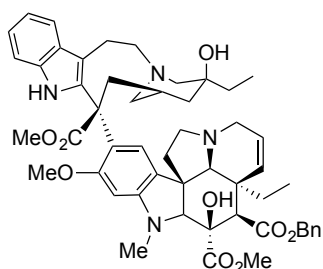

48



**Compound 48.** (–)-**45** (4.5 mg, 8.4  $\mu\text{mol}$ ) and catharanthine sulfate (3.6 mg, 8.4  $\mu\text{mol}$ ) were combined with TFE (36  $\mu\text{L}$ ), aqueous 0.1 N HCl (0.18 mL) and water (0.18 mL) in a 2-dram vial. The vial was fitted with a rubber septum and flushed with Ar.  $\text{FeCl}_3 \cdot 6\text{H}_2\text{O}$  (11.4 mg, 42  $\mu\text{mol}$ ) was added producing a bright yellow precipitate. The mixture was stirred for 2 h during which time the precipitate re-dissolved leaving a clear, yellow solution. Meanwhile, a suspension of  $\text{Fe}_2(\text{ox})_3 \cdot 6\text{H}_2\text{O}$  (40.5 mg, 84  $\mu\text{mol}$ ) in water (37 mL) was stirred for 2 h, by which time the  $\text{Fe}_2(\text{ox})_3 \cdot 6\text{H}_2\text{O}$  was completely dissolved. This mixture was cooled to 0  $^\circ\text{C}$  and air was bubbled vigorously through the solution for 15–20 min. The  $\text{FeCl}_3$  coupling mixture was transferred to the  $\text{Fe}_2(\text{ox})_3/\text{O}_2$  solution by pipette, then  $\text{NaBH}_4$  (5.4 mg, 168  $\mu\text{mol}$ ) was added as a solution in water (0.3 mL). After stirring for 30 min, the reaction was quenched by the addition of aqueous  $\text{NH}_4\text{OH}$  (5 mL) and the resulting mixture was extracted with 10%  $\text{MeOH}/\text{CH}_2\text{Cl}_2$  ( $4 \times 30$  mL). The combined organic extracts were dried ( $\text{Na}_2\text{SO}_4$ ) and concentrated under reduced pressure. PTLC ( $\text{SiO}_2$ , 97:3:3  $\text{EtOAc}/\text{MeOH}/\text{Et}_3\text{N}$ ) gave **48** (2.3 mg, 31%) as a colorless film, along with the corresponding leurosidine analogue (1.5 mg, 20%) and anhydrovinblastine analogue (1.3 mg, 18%) also as colorless films. For **48**:  $[\alpha]_{\text{D}}^{21} +22$  ( $c$  0.10,  $\text{CHCl}_3$ );  $^1\text{H}$  NMR (600 MHz,  $\text{CDCl}_3$ )  $\delta$  9.71 (s, 1H), 8.04 (s, 1H), 7.50 (d,  $J = 7.9$  Hz, 1H), 7.44–7.40 (m, 2H), 7.38–7.33 (m, 2H), 7.33–7.29 (m, 1H), 7.19–7.07 (m, 3H), 6.58 (s, 1H), 6.07 (s, 1H), 5.75 (dd,  $J = 10.5, 4.9$  Hz, 1H), 5.31 (d,  $J = 12.3$  Hz, 1H), 5.07 (d,  $J = 12.3$  Hz, 1H), 5.01 (dt,  $J = 9.8, 1.9$  Hz, 1H), 3.94 (t,  $J = 14.2$  Hz, 1H), 3.77 (s, 3H), 3.65 (s, 3H), 3.62 (s, 1H), 3.60 (s, 3H), 3.35–3.21 (m, 3H), 3.22–3.13 (m, 2H), 3.12 (s, 1H), 2.87 (s, 2H), 2.78 (d,  $J = 16.1$  Hz, 1H), 2.68 (s, 3H), 2.65 (s, 1H), 2.45 (d,  $J = 7.6$  Hz, 1H), 2.31 (d,  $J = 15.0$  Hz, 1H), 2.14 (ddd,  $J = 14.6, 9.2, 6.1$  Hz, 1H), 2.00 (dt,  $J = 14.2, 7.2$  Hz, 1H), 1.81 (ddd,  $J = 13.7, 11.3, 5.0$  Hz, 1H), 1.55–1.46 (m, 1H), 1.45 (d,  $J = 14.3$  Hz, 1H), 1.37 (d,  $J = 23.3$  Hz, 2H), 1.20 (dt,  $J = 13.7, 6.8$  Hz, 1H), 0.89 (t,  $J = 7.5$  Hz, 3H), 0.82 (t,  $J = 7.4$  Hz, 3H); IR (neat)  $\nu_{\text{max}}$  2923, 1731, 1613, 1459, 1258, 1168, 1038, 801, 747  $\text{cm}^{-1}$ ; ESI-TOF HRMS  $m/z$  887.4588 ( $\text{M}+\text{H}^+$ ,  $\text{C}_{52}\text{H}_{62}\text{N}_4\text{O}_9$  requires 887.4589).

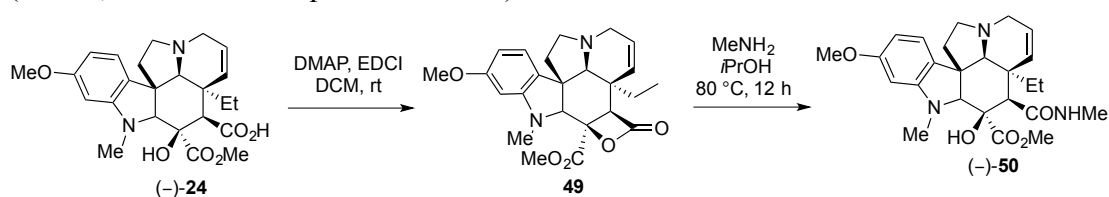

**Compound (–)-50.** EDCI (3.6 mg, 23  $\mu\text{mol}$ ) and DMAP (2.8 mg, 23  $\mu\text{mol}$ ) were added to a solution of (–)-**24** (5.1 mg, 11.5  $\mu\text{mol}$ ) in  $\text{CH}_2\text{Cl}_2$  (0.5 mL). After stirring for 12 h at room temperature, the solvent was removed under a stream of  $\text{N}_2$ . The residue was treated with  $i\text{PrOH}$  (0.4 mL),  $\text{NaHCO}_3$  (29 mg, 345  $\mu\text{mol}$ ) and  $\text{MeNH}_2 \cdot \text{HCl}$  (15.5 mg, 230  $\mu\text{mol}$ ). The mixture was heated at 80  $^\circ\text{C}$  for 12 h, before the reaction mixture was filtered through a short pad of Celite and the solvent was removed under a stream of  $\text{N}_2$ . PTLC ( $\text{SiO}_2$ , 75%  $\text{EtOAc}/\text{hexanes}$ ) provided (–)-**50** (3.2 mg, 61%) as a colorless oil:  $[\alpha]_{\text{D}}^{23} -51$  ( $c$  0.53,  $\text{CHCl}_3$ );  $^1\text{H}$  NMR (600 MHz,  $\text{CDCl}_3$ )  $\delta$  10.36 (s, 1H), 7.30 (d,  $J = 5.1$  Hz, 1H), 6.83 (d,  $J = 8.3$  Hz, 1H), 6.24 (dd,  $J = 8.2, 2.3$  Hz, 1H), 5.98 (d,  $J = 2.3$  Hz, 1H), 5.76 (ddd,  $J = 10.1, 5.0, 1.7$  Hz, 1H), 5.22 (dt,  $J = 10.1, 2.1$  Hz, 1H), 3.75 (d,  $J = 3.0$  Hz, 6H), 3.58 (s, 1H), 3.43–3.35 (m, 2H), 2.88 (s, 1H), 2.84 (dt,  $J = 16.1, 2.1$

Hz, 1H), 2.73 (s, 1H), 2.67 (d,  $J = 4.8$  Hz, 3H), 2.66 (s, 3H), 2.54 (q,  $J = 9.2$  Hz, 1H), 2.22 (dd,  $J = 9.0, 6.9$  Hz, 2H), 1.81 (dq,  $J = 14.7, 7.4$  Hz, 1H), 0.97 (dq,  $J = 14.5, 7.2$  Hz, 1H), 0.54 (t,  $J = 7.3$  Hz, 3H);  $^{13}\text{C}$  NMR (151 MHz,  $\text{CDCl}_3$ )  $\delta$  173.2, 173.1, 161.1, 153.5, 132.7, 124.3, 123.4, 122.4, 104.3, 95.4, 82.3, 78.6, 65.0, 55.3, 53.1, 52.5, 52.2, 50.9, 50.8, 44.2, 40.8, 38.4, 32.0, 25.5, 7.8; IR (neat)  $\nu_{\text{max}}$  3350, 2961, 1738, 1659, 1615, 1539, 1502, 1454, 1434, 1244, 1087, 1041, 750  $\text{cm}^{-1}$ ; ESI-TOF HRMS  $m/z$  456.2493 ( $\text{M}+\text{H}^+$ ,  $\text{C}_{25}\text{H}_{33}\text{N}_3\text{O}_5$  requires 456.2493).

For Compound **49**:  $^1\text{H}$  NMR (600 MHz,  $\text{CDCl}_3$ )  $\delta$  7.00 (d,  $J = 8.2$  Hz, 1H), 6.38 (dd,  $J = 8.2, 2.3$  Hz, 1H), 6.12 (d,  $J = 2.3$  Hz, 1H), 5.92 (ddd,  $J = 9.8, 4.4, 1.9$  Hz, 1H), 5.42 (dt,  $J = 9.8, 2.3$  Hz, 1H), 3.89 (s, 3H), 3.77 (s, 3H), 3.77 (s, 1H), 3.70 (s, 1H), 3.43 (ddd,  $J = 16.6, 4.4, 1.9$  Hz, 1H), 3.32–3.24 (m, 1H), 2.81 (dd,  $J = 16.6, 2.3$  Hz, 1H), 2.69 (s, 3H), 2.49 (s, 1H), 2.43 (ddd,  $J = 10.8, 8.9, 7.5$  Hz, 1H), 2.34 (ddd,  $J = 13.0, 7.5, 1.6$  Hz, 1H), 2.23 (ddd,  $J = 13.0, 10.6, 7.8$  Hz, 1H), 1.64 (dt,  $J = 14.3, 7.3$  Hz, 1H), 1.24 (dq,  $J = 14.7, 7.6$  Hz, 1H), 0.41 (t,  $J = 7.4$  Hz, 3H); ESI-TOF HRMS  $m/z$  425.2069 ( $\text{M}+\text{H}^+$ ,  $\text{C}_{24}\text{H}_{28}\text{N}_2\text{O}_5$  requires 425.2071). Note: Due to the stability of **49**, only a small amount of pure compound was obtained through PTLC purification ( $\text{SiO}_2$ , 50% EtOAc/hexanes).

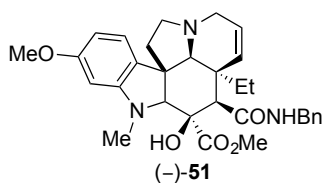

**Compound (-)-51.** EDCI (2.8 mg, 18  $\mu\text{mol}$ ) and DMAP (2.2 mg, 18  $\mu\text{mol}$ ) were added to a solution of (-)-**24** (4 mg, 9  $\mu\text{mol}$ ) in  $\text{CH}_2\text{Cl}_2$  (0.5 mL). After stirring for 12 h at room temperature, the solvent was removed under a stream of  $\text{N}_2$  to give crude **49**. The residue was treated with *i*PrOH (0.3 mL) and  $\text{BnNH}_2$  (0.1 mL). The mixture was heated at 60  $^\circ\text{C}$  for 12 h, before the solvent was removed under a stream of  $\text{N}_2$ . PTLC ( $\text{SiO}_2$ , 50% hexanes/acetone) provided (-)-**51** (2.4 mg, 50%) as an off-white solid:  $[\alpha]_{\text{D}}^{26} -216$  ( $c$  0.36,  $\text{CHCl}_3$ );  $^1\text{H}$  NMR (600 MHz,  $\text{CDCl}_3$ )  $\delta$  10.47 (s, 1H), 7.84 (t,  $J = 5.8$  Hz, 1H), 7.33–7.26 (m, 2H), 7.25–7.19 (m, 3H), 6.85 (d,  $J = 8.2$  Hz, 1H), 6.26 (dd,  $J = 8.2, 2.3$  Hz, 1H), 6.00 (d,  $J = 2.3$  Hz, 1H), 5.76–5.68 (m, 1H), 5.27 (dt,  $J = 10.2, 2.0$  Hz, 1H), 4.51 (dd,  $J = 14.8, 6.4$  Hz, 1H), 4.19 (dd,  $J = 14.8, 5.4$  Hz, 1H), 3.76 (s, 3H), 3.58 (s, 3H), 3.57 (s, 1H), 3.41–3.33 (m, 2H), 2.94 (s, 1H), 2.83 (dt,  $J = 16.0, 2.2$  Hz, 1H), 2.73 (s, 1H), 2.65 (s, 3H), 2.55 (td,  $J = 10.0, 7.5$  Hz, 1H), 2.26–2.19 (m, 2H), 1.84 (dq,  $J = 14.7, 7.4$  Hz, 1H), 0.99 (dq,  $J = 14.5, 7.2$  Hz, 1H), 0.55 (t,  $J = 7.3$  Hz, 3H);  $^{13}\text{C}$  NMR (151 MHz,  $\text{CDCl}_3$ )  $\delta$  173.0, 172.2, 161.2, 153.6, 138.7, 132.8, 128.3, 127.9, 126.9, 124.3, 123.5, 122.5, 104.3, 95.5, 82.5, 78.5, 65.1, 55.3, 53.1, 52.4, 52.3, 50.9, 50.8, 44.2, 42.7, 40.9, 38.4, 32.2, 7.9; IR (neat)  $\nu_{\text{max}}$  3340, 2929, 1737, 1658, 1614, 1531, 1501, 1454, 1244, 1167, 1086, 1040, 801, 750  $\text{cm}^{-1}$ ; ESI-TOF HRMS  $m/z$  532.2797 ( $\text{M}+\text{H}^+$ ,  $\text{C}_{31}\text{H}_{37}\text{N}_3\text{O}_5$  requires 532.2806).

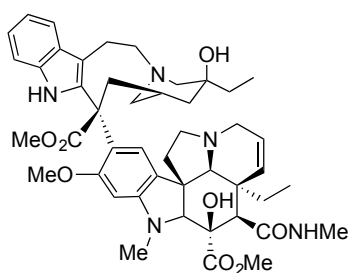

52

**Compound 52.** (–)-**50** (3.2 mg, 7.0  $\mu\text{mol}$ ) and catharanthine sulfate (3.1 mg, 7.0  $\mu\text{mol}$ ) were combined with TFE (30  $\mu\text{L}$ ), aqueous 0.1 N HCl (0.15 mL) and water (0.15 mL) in a 2-dram vial. The vial was fitted with a rubber septum and flushed with Ar.  $\text{FeCl}_3 \cdot 6\text{H}_2\text{O}$  (9.5 mg, 35  $\mu\text{mol}$ ) was added producing a bright yellow precipitate. The mixture was stirred for 2 h during which time the precipitate re-dissolved leaving a clear, yellow solution. Meanwhile, a suspension of  $\text{Fe}_2(\text{ox})_3 \cdot 6\text{H}_2\text{O}$  (34 mg, 70  $\mu\text{mol}$ ) in water (31 mL) was stirred for 2 h, by which time the  $\text{Fe}_2(\text{ox})_3 \cdot 6\text{H}_2\text{O}$  was completely dissolved. This mixture was cooled to 0  $^\circ\text{C}$  and air was bubbled vigorously through the solution for 15–20 min. The  $\text{FeCl}_3$  coupling mixture was transferred to the  $\text{Fe}_2(\text{ox})_3/\text{O}_2$  solution by pipette, then  $\text{NaBH}_4$  (4.5 mg, 140  $\mu\text{mol}$ ) was added as a solution in water (0.3 mL). After stirring for 30 min, the reaction was quenched by the addition of aqueous  $\text{NH}_4\text{OH}$  (5 mL) and the resulting mixture was extracted with 10% MeOH/ $\text{CH}_2\text{Cl}_2$  (4  $\times$  30 mL). The combined organic extracts were dried ( $\text{Na}_2\text{SO}_4$ ) and concentrated under reduced pressure. PTLC ( $\text{SiO}_2$ , 95:5:3 EtOAc/MeOH/ $\text{Et}_3\text{N}$ ) gave **52** (1.5 mg, 26%) as a colorless film, along with the corresponding leurosidine analogue (0.8 mg, 14%) and anhydrovinblastine analogue (0.4 mg, 7%) also as colorless films. For **52**:  $[\alpha]_{\text{D}}^{24} +17$  (*c* 0.13,  $\text{CHCl}_3$ );  $^1\text{H NMR}$  (600 MHz,  $\text{CDCl}_3$ )  $\delta$  10.57 (s, 1H), 8.07 (s, 1H), 7.53 (d,  $J = 7.9$  Hz, 1H), 7.37–7.32 (m, 1H), 7.20–7.09 (m, 3H), 6.62 (s, 1H), 6.08 (s, 1H), 5.78 (ddd,  $J = 10.2, 5.0, 1.6$  Hz, 1H), 5.26 (dt,  $J = 10.0, 2.0$  Hz, 1H), 3.97 (t,  $J = 14.2$  Hz, 1H), 3.81 (d,  $J = 1.3$  Hz, 6H), 3.76 (s, 1H), 3.63 (s, 3H), 3.59 (s, 1H), 3.47–3.35 (m, 2H), 3.35–3.26 (m, 2H), 3.26–3.13 (m, 2H), 2.95–2.82 (m, 4H), 2.73 (d,  $J = 4.4$  Hz, 7H), 2.56–2.46 (m, 2H), 2.34 (d,  $J = 14.8$  Hz, 1H), 2.12 (ddd,  $J = 14.5, 9.2, 5.5$  Hz, 1H), 2.06 (dt,  $J = 14.3, 7.2$  Hz, 1H), 1.83 (ddd,  $J = 13.8, 11.6, 5.6$  Hz, 1H), 1.53 (d,  $J = 14.4$  Hz, 1H), 1.44 (dd,  $J = 14.4, 6.2$  Hz, 1H), 1.40–1.32 (m, 2H), 1.32–1.24 (m, 2H), 0.91 (t,  $J = 7.5$  Hz, 3H), 0.87 (t,  $J = 7.4$  Hz, 3H); IR (neat)  $\nu_{\text{max}}$  3341, 2935, 1736, 1655, 1615, 1503, 1460, 1433, 1245, 1141, 1092, 1038, 749  $\text{cm}^{-1}$ ; ESI-TOF HRMS  $m/z$  810.4438 ( $\text{M}+\text{H}^+$ ,  $\text{C}_{48}\text{H}_{62}\text{N}_4\text{O}_9$  requires 810.4436).

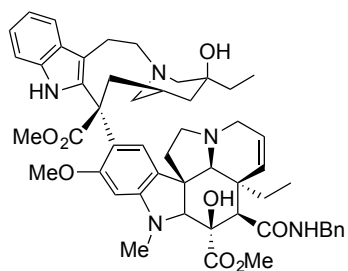

53

**Compound 53.** (–)-**51** (3 mg, 5.6 μmol) and catharanthine sulfate (2.4 mg, 5.6 μmol) were combined with TFE (24 μL), aqueous 0.1 N HCl (0.12 mL) and water (0.12 mL) in a 2-dram vial. The vial was fitted with a rubber septum and flushed with Ar. FeCl<sub>3</sub>·6H<sub>2</sub>O (7.6 mg, 28 μmol) was added producing a bright yellow precipitate. The mixture was stirred for 2 h during which time the precipitate re-dissolved leaving a clear, yellow solution. Meanwhile, a suspension of Fe<sub>2</sub>(ox)<sub>3</sub>·6H<sub>2</sub>O (27 mg, 56 μmol) in water (25 mL) was stirred for 2 h, by which time the Fe<sub>2</sub>(ox)<sub>3</sub>·6H<sub>2</sub>O was completely dissolved. This mixture was cooled to 0 °C and air was bubbled vigorously through the solution for 15–20 min. The FeCl<sub>3</sub> coupling mixture was transferred to the Fe<sub>2</sub>(ox)<sub>3</sub>/O<sub>2</sub> solution by pipette, then NaBH<sub>4</sub> (3.6 mg, 113 μmol) was added as a solution in water (0.3 mL). After stirring for 30 min, the reaction was quenched by the addition of aqueous NH<sub>4</sub>OH (5 mL) and the resulting mixture was extracted with 10% MeOH/CH<sub>2</sub>Cl<sub>2</sub> (4 × 30 mL). The combined organic extracts were dried (Na<sub>2</sub>SO<sub>4</sub>) and concentrated under reduced pressure. PTLC (SiO<sub>2</sub>, 97:3:3 EtOAc/MeOH/Et<sub>3</sub>N) gave **53** (1.6 mg, 32%) as a colorless film, along with the corresponding leurosidine analogue (0.8 mg, 16%) and anhydrovinblastine analogue (0.9 mg, 18%) also as colorless films. For **53**: [α]<sub>D</sub><sup>24</sup> +3 (c 0.15, CHCl<sub>3</sub>); <sup>1</sup>H NMR (600 MHz, CDCl<sub>3</sub>) δ 10.67 (s, 1H), 8.08 (s, 1H), 7.85 (t, *J* = 5.9 Hz, 1H), 7.53 (d, *J* = 7.9 Hz, 1H), 7.41–7.21 (m, 6H), 7.22–7.09 (m, 3H), 6.61 (s, 1H), 6.08 (s, 1H), 5.73–5.65 (m, 1H), 5.29 (dt, *J* = 10.1, 2.0 Hz, 1H), 4.56 (dd, *J* = 14.8, 6.4 Hz, 1H), 4.23 (dd, *J* = 14.8, 5.3 Hz, 1H), 4.01–3.92 (m, 1H), 3.81 (s, 3H), 3.63 (d, *J* = 6.8 Hz, 6H), 3.57 (s, 1H), 3.49–3.35 (m, 2H), 3.34–3.14 (m, 3H), 2.96 (s, 1H), 2.93–2.84 (m, 2H), 2.71 (s, 3H), 2.51 (td, *J* = 10.7, 10.1, 5.2 Hz, 2H), 2.35 (d, *J* = 15.2 Hz, 1H), 2.15–2.02 (m, 2H), 1.84 (ddd, *J* = 13.8, 11.5, 5.6 Hz, 1H), 1.57–1.51 (m, 1H), 1.45 (dd, *J* = 14.4, 6.2 Hz, 1H), 1.41–1.32 (m, 2H), 1.32–1.23 (m, 2H), 1.20–1.14 (m, 2H), 0.92 (t, *J* = 7.5 Hz, 3H), 0.87 (t, *J* = 7.4 Hz, 3H); IR (neat) ν<sub>max</sub> 2921, 1736, 1654, 1458, 1258, 1088, 1020, 798, 744, 698, 663 cm<sup>-1</sup>; ESI-TOF HRMS *m/z* 886.4742 (M+H<sup>+</sup>, C<sub>52</sub>H<sub>63</sub>N<sub>5</sub>O<sub>8</sub> requires 886.4749).

#### Experimental procedure for the tubulin binding assay

To 850 μL of Buffer (PEM + 1 mM GTP) was added 100 μL of tubulin (1 mg/mL) and 25 μL BODIPY-VBL (72 μM solution). After incubating at 37 °C for 15 min, 25 μL of competitive ligand (720 μM solution) was added and the solution was incubated again for an additional 60 min at 37 °C. Final concentrations: [tubulin] = 0.91 μM, [BODIPY-VBL] = 1.8 μM, [competitive ligand] = 18 μM. The solution was then transferred (4 × 100 μL aliquots of each) into the wells of a 96-well plate and the fluorescence intensity (FI) (Ex 480 nm, Em 514 nm, Cutoff 495 nm) was measured in a plate reader that was preset to 37 °C. Two controls were run (solution with BODIPY-VBL but no protein or competitive ligand and a solution with BODIPY-VBL and tubulin but no competitive ligand) in order to determine minimum and maximum fluorescence intensities. Percent displacement was then determined using the formula: % displacement = (Control 2 FI – Experimental FI)/(Control 2 – Control 1) × 100.

## References:

S1. Ishikawa, H.; Elliott, G. I.; Velcicky, J.; Choi, Y.; Boger, D. L. *J. Am. Chem. Soc.* **2006**, *128*, 10596.

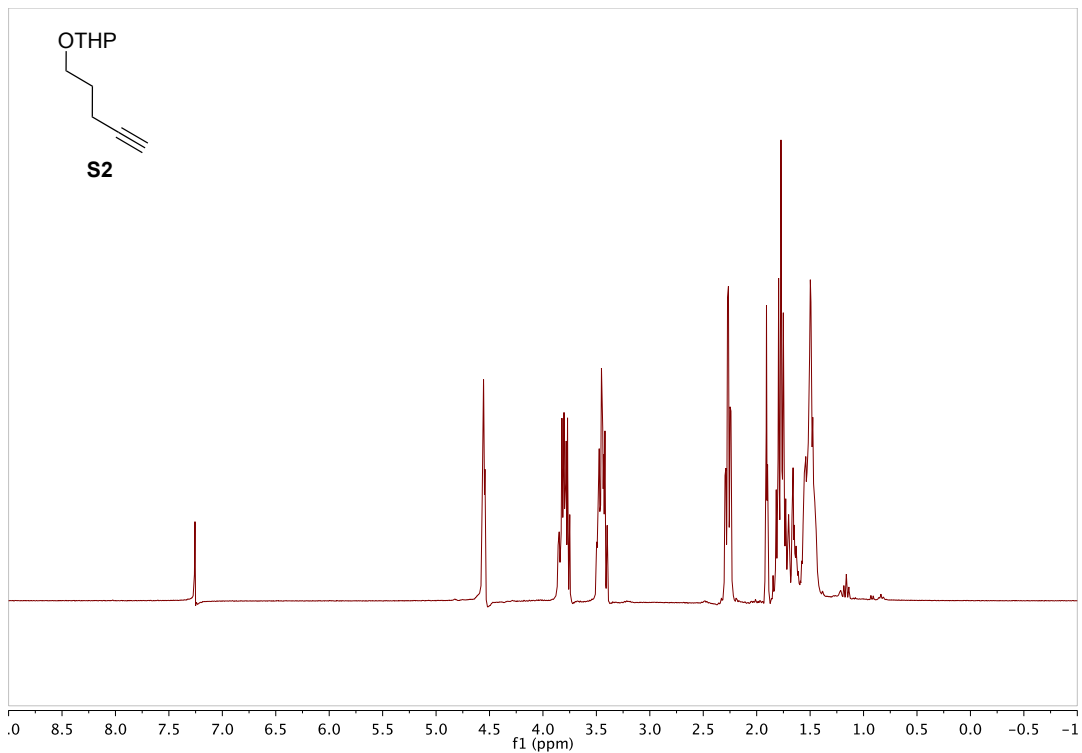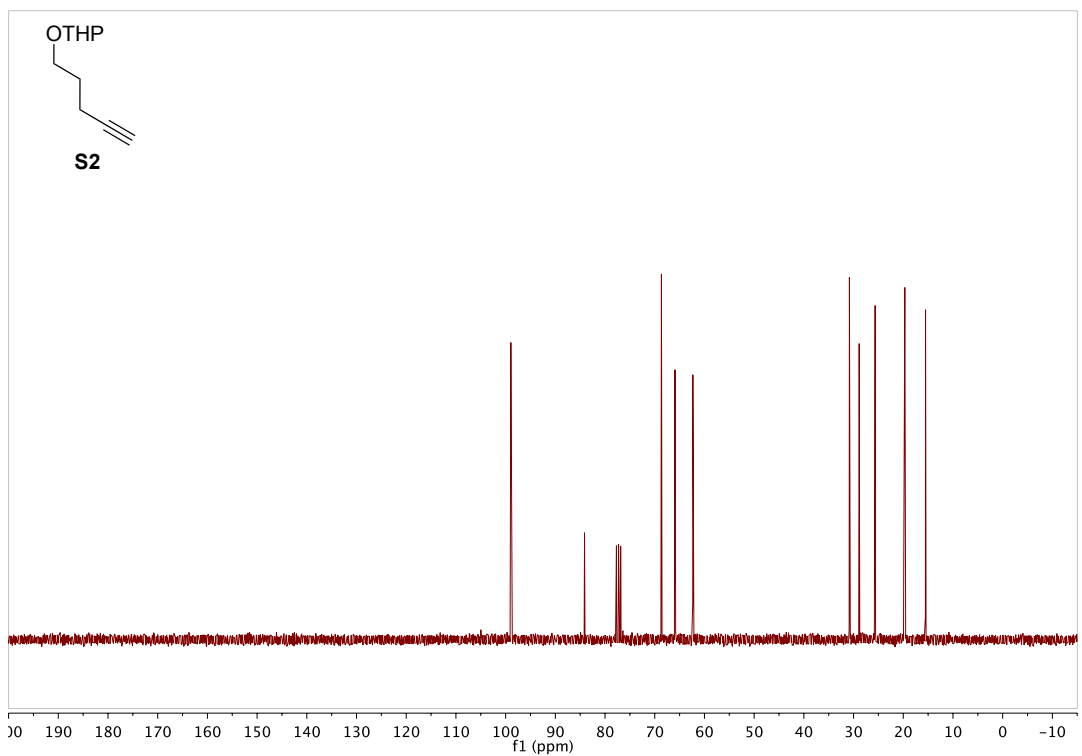

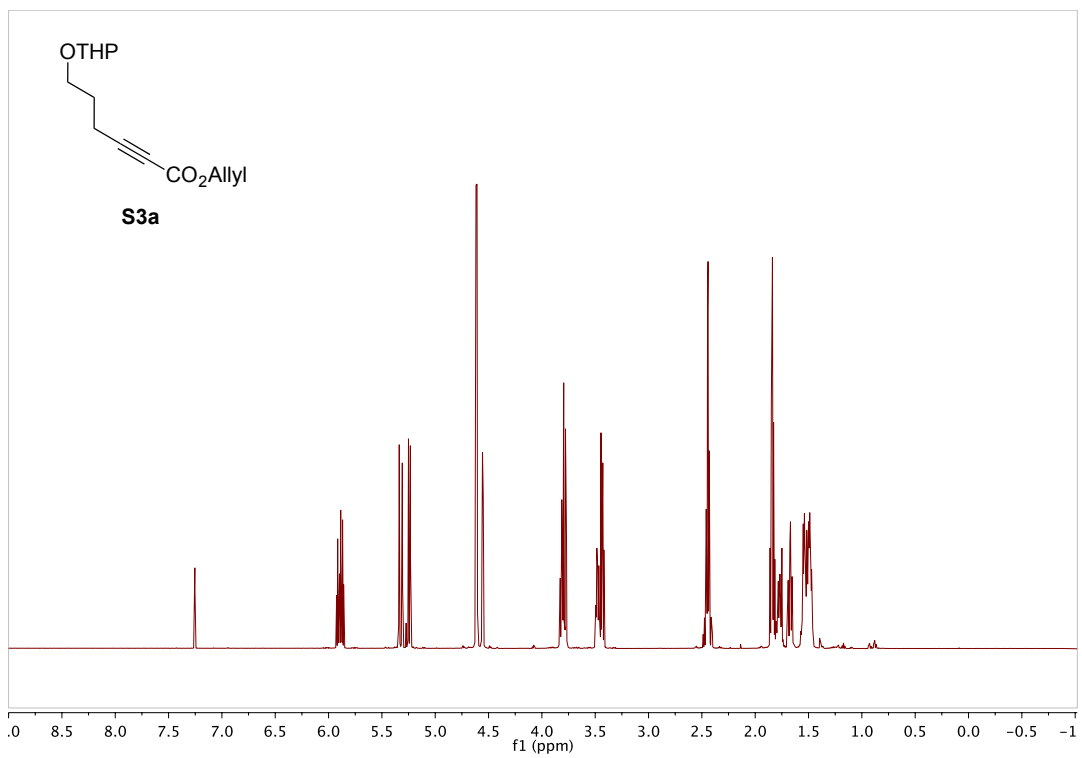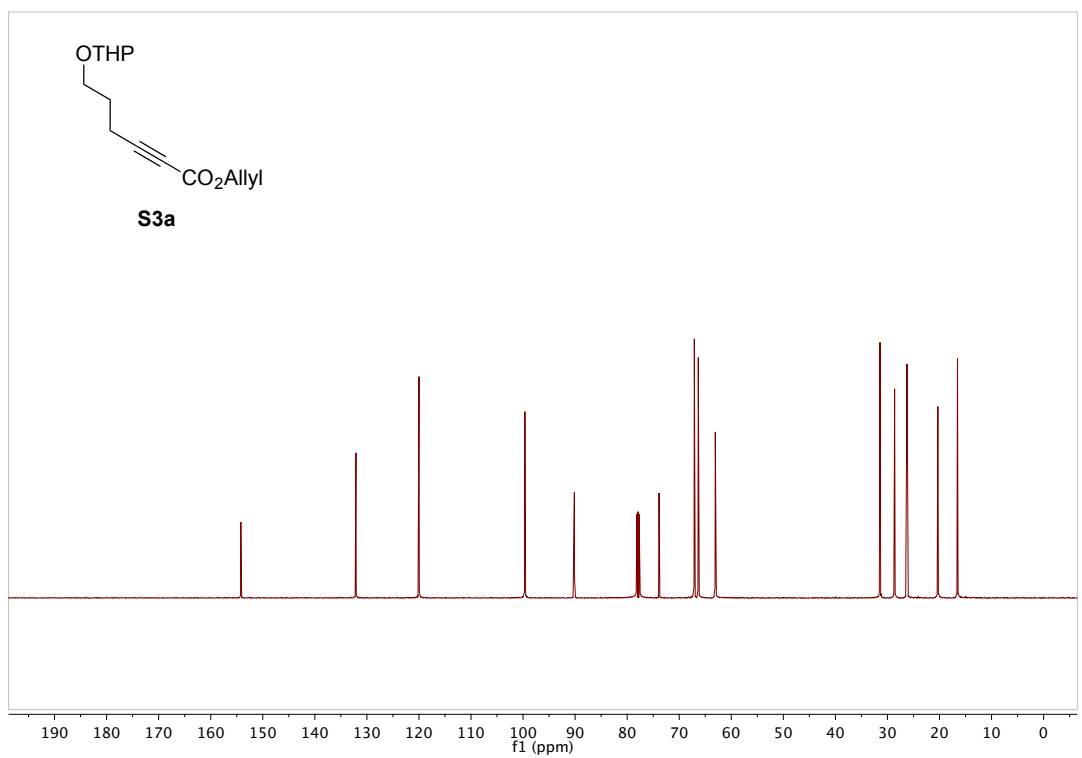

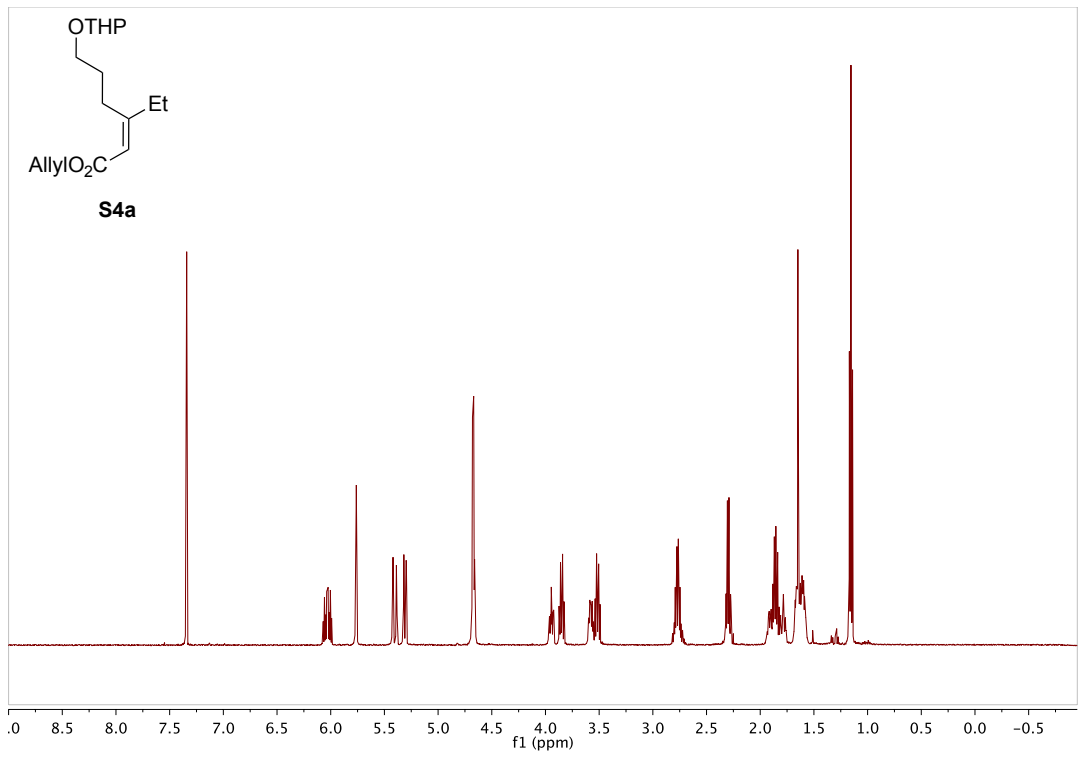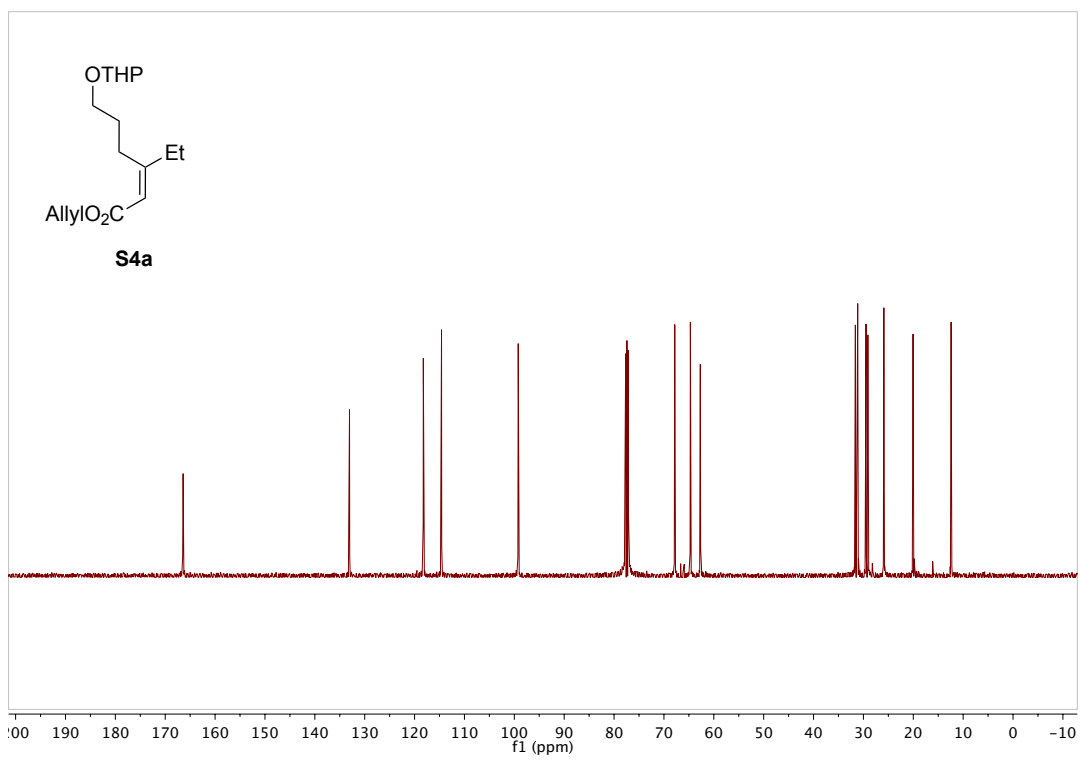

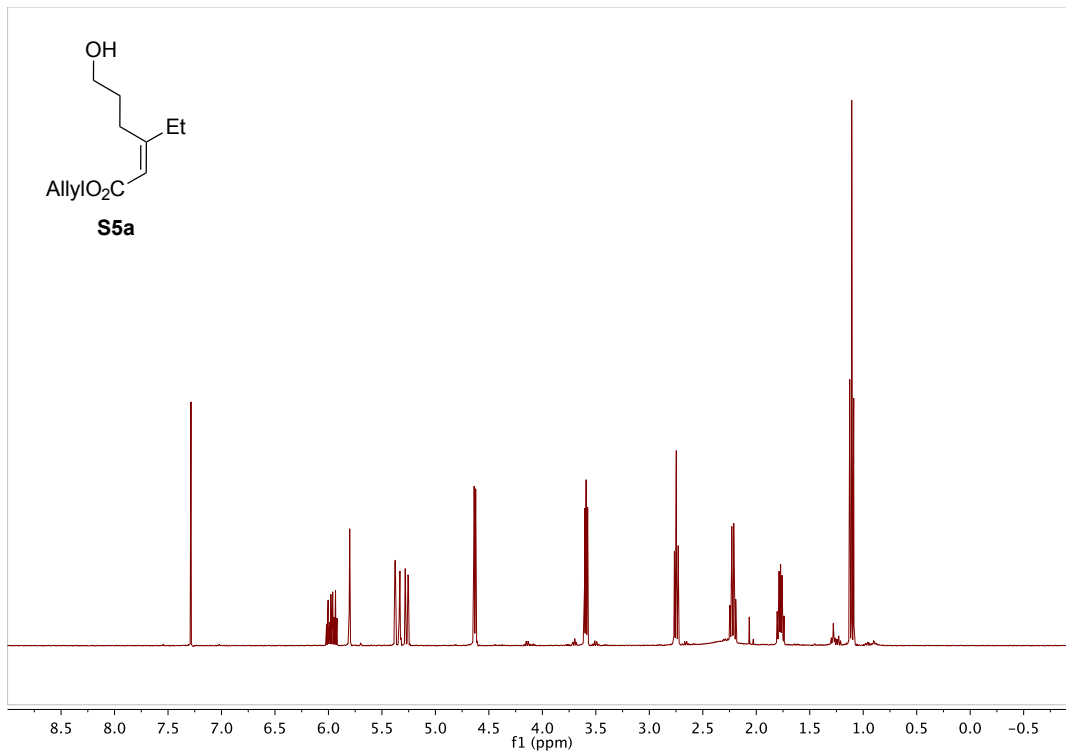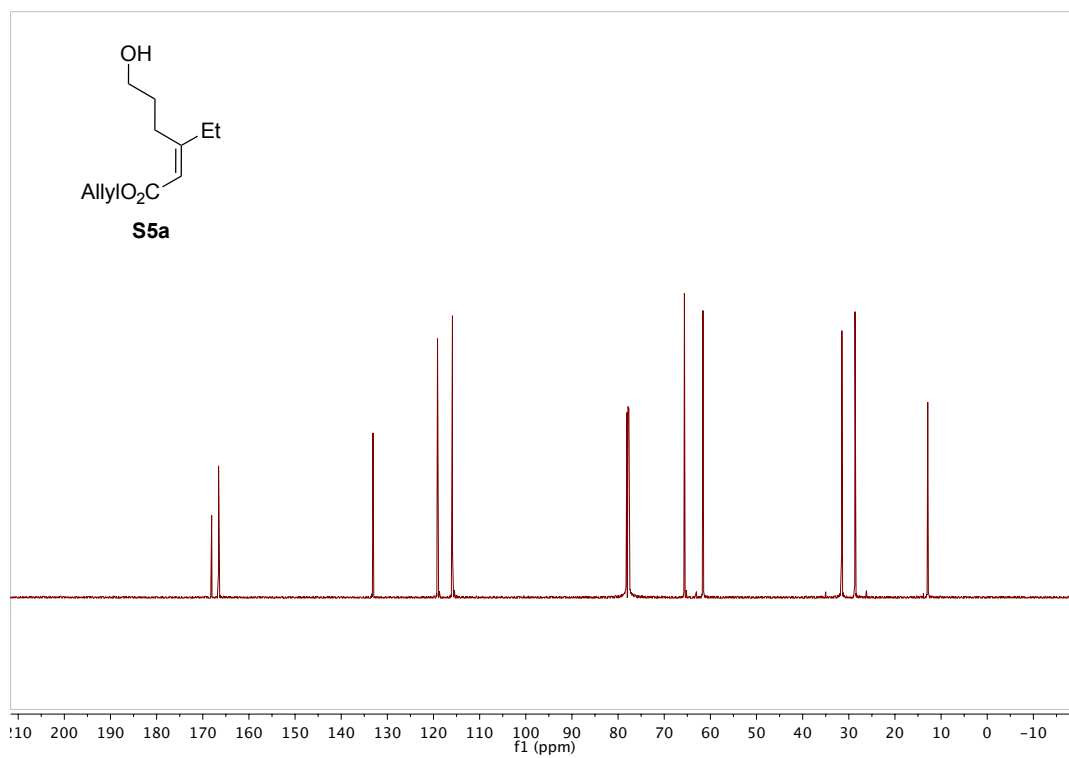



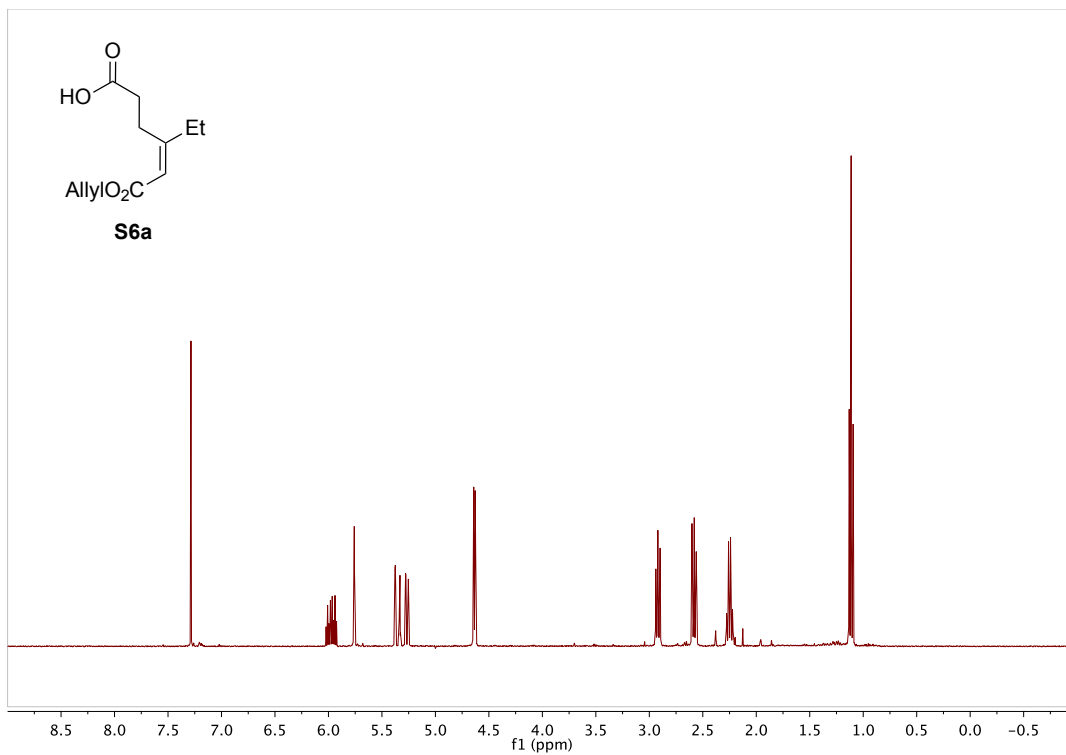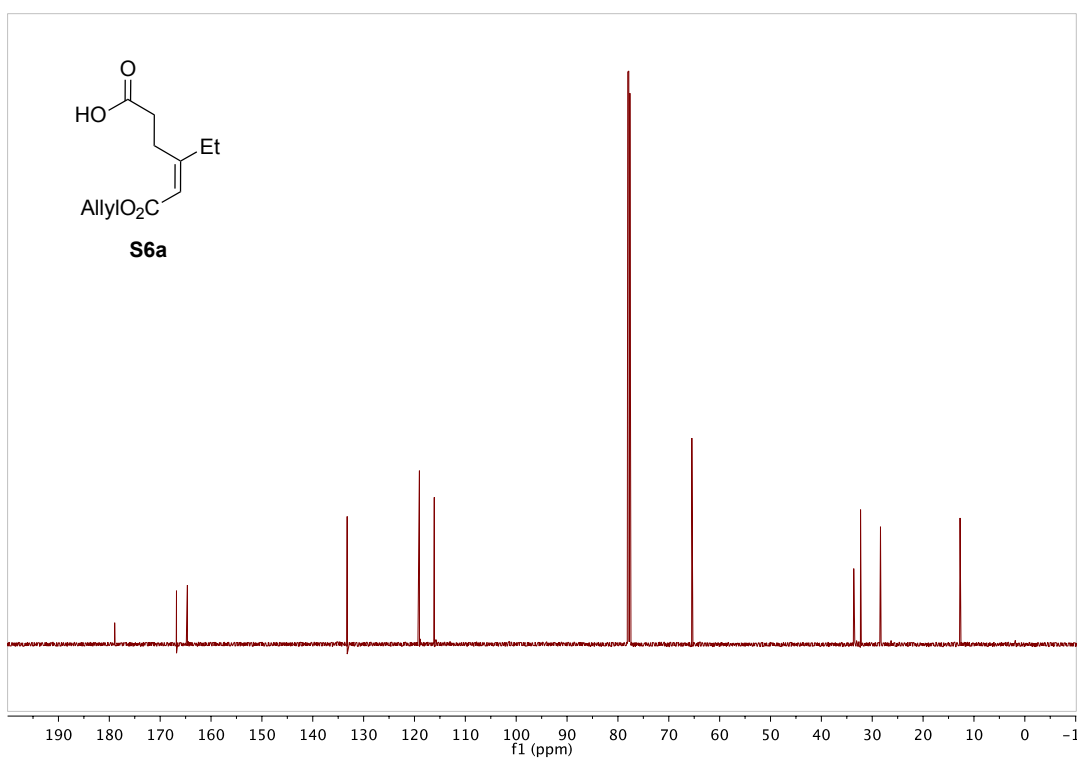

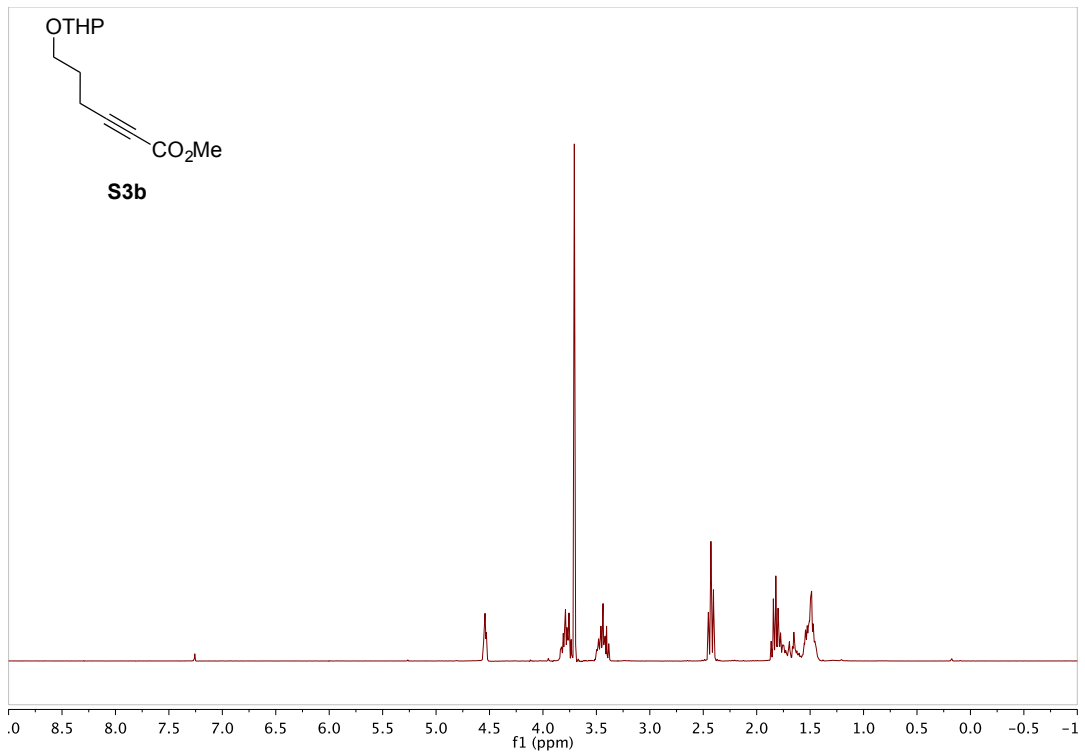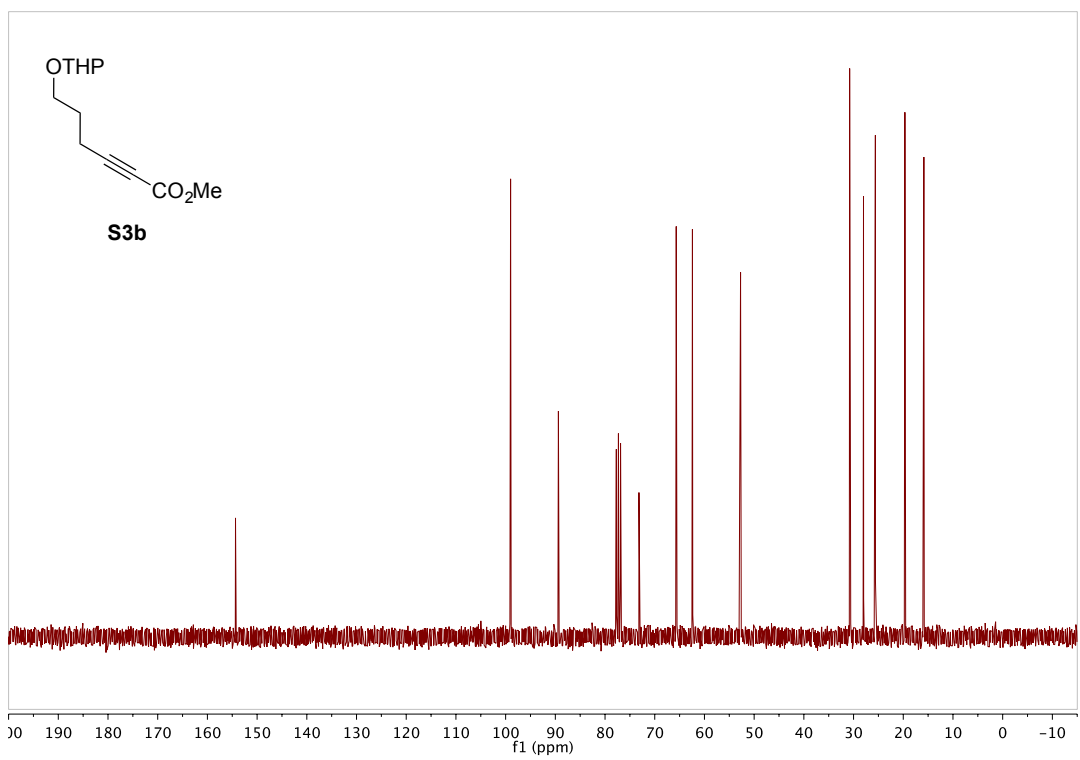

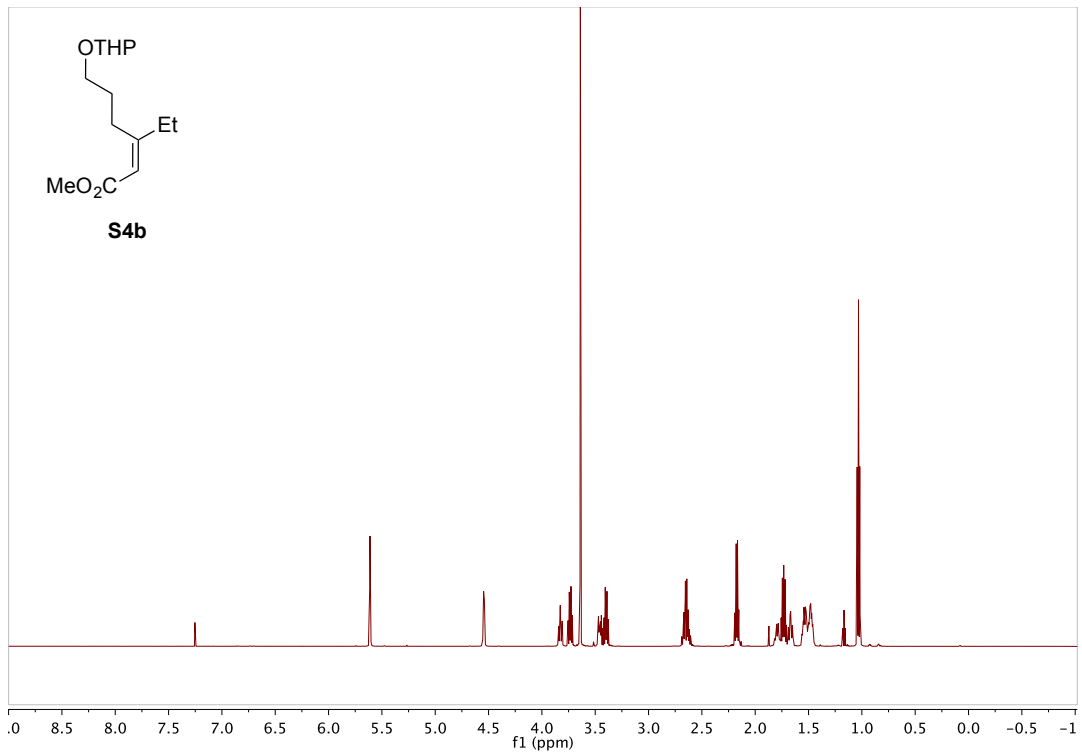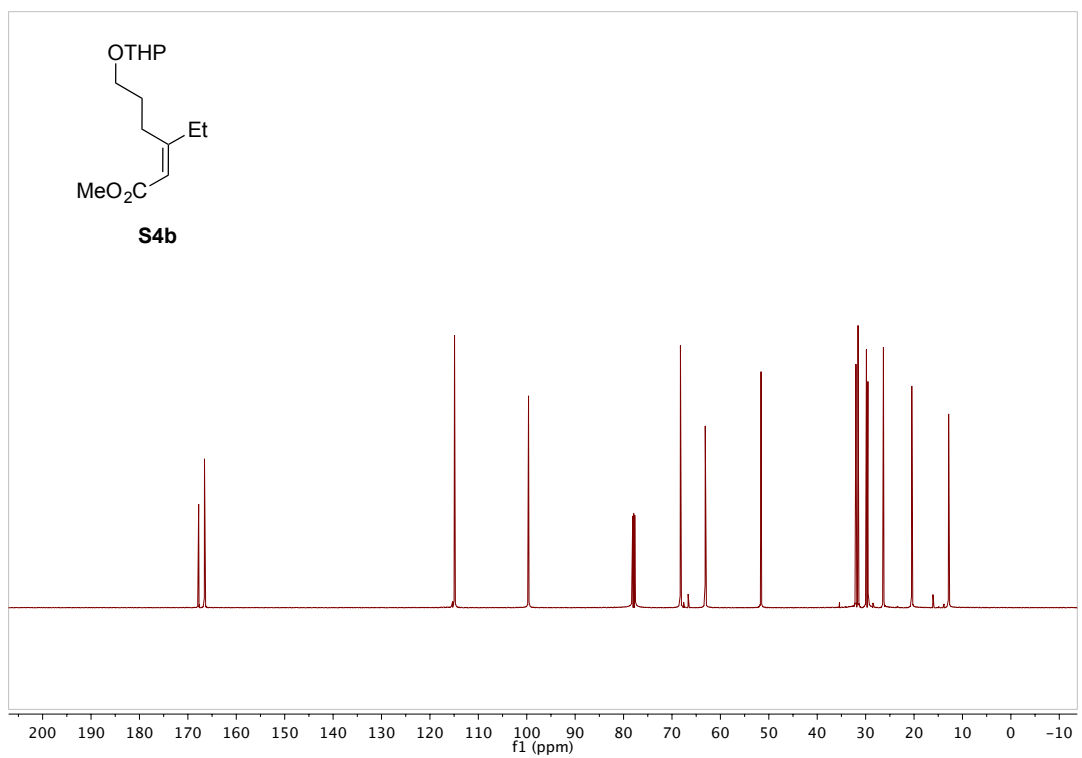

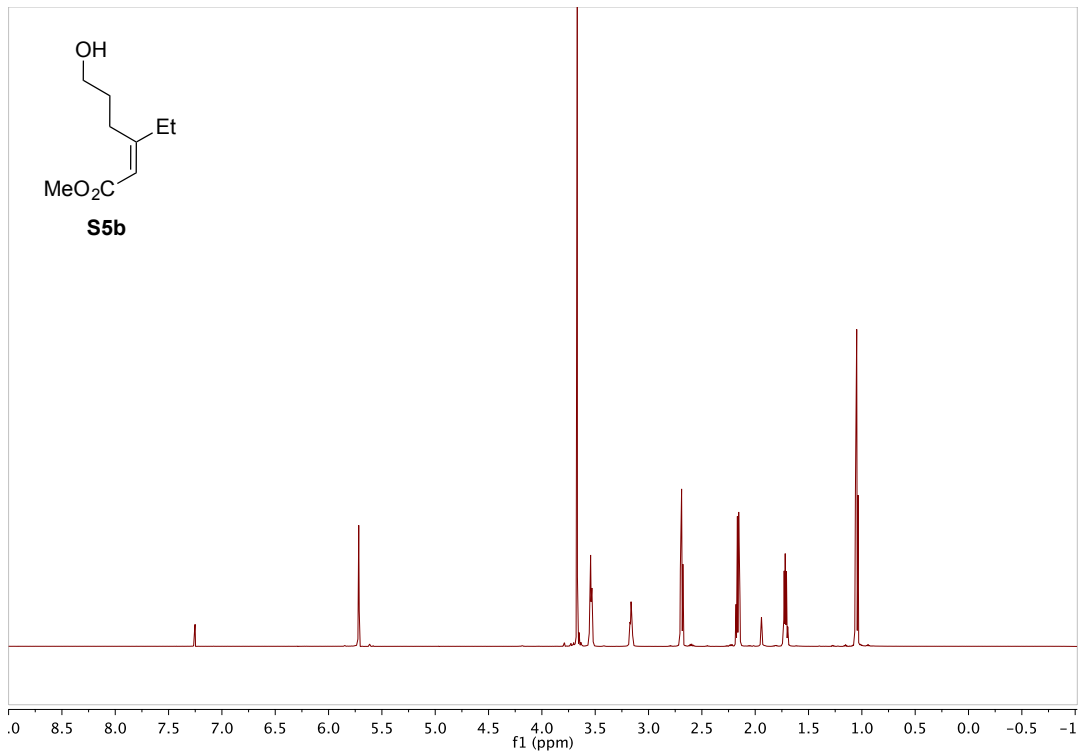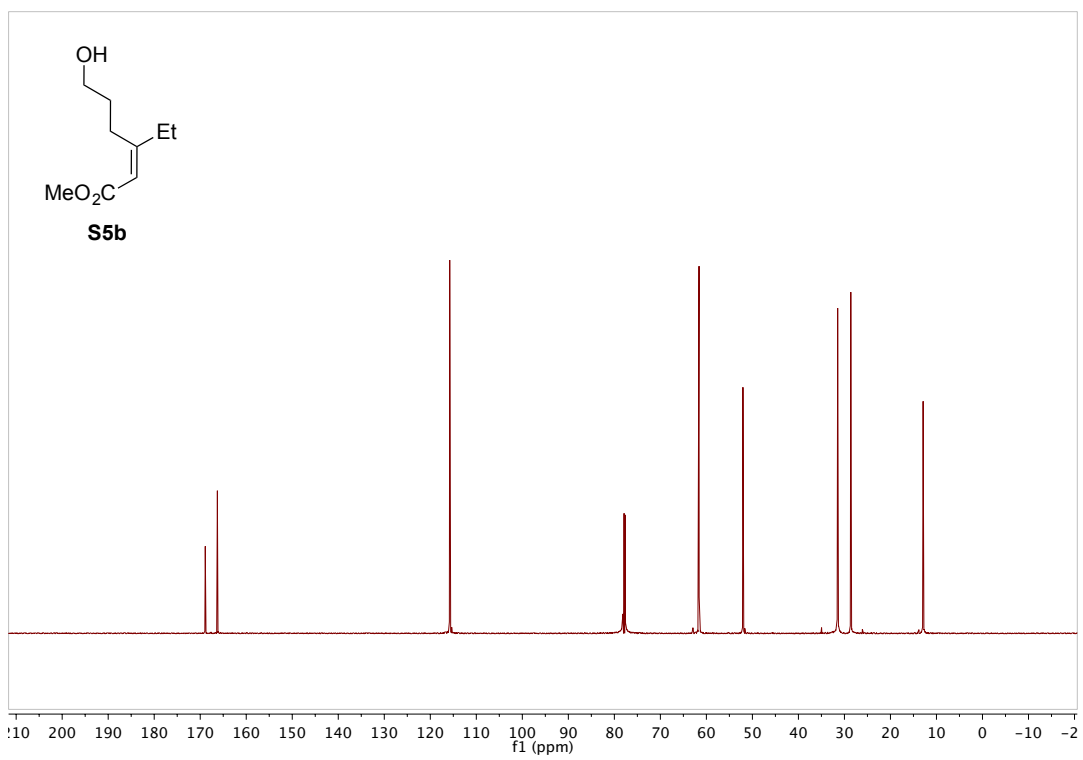

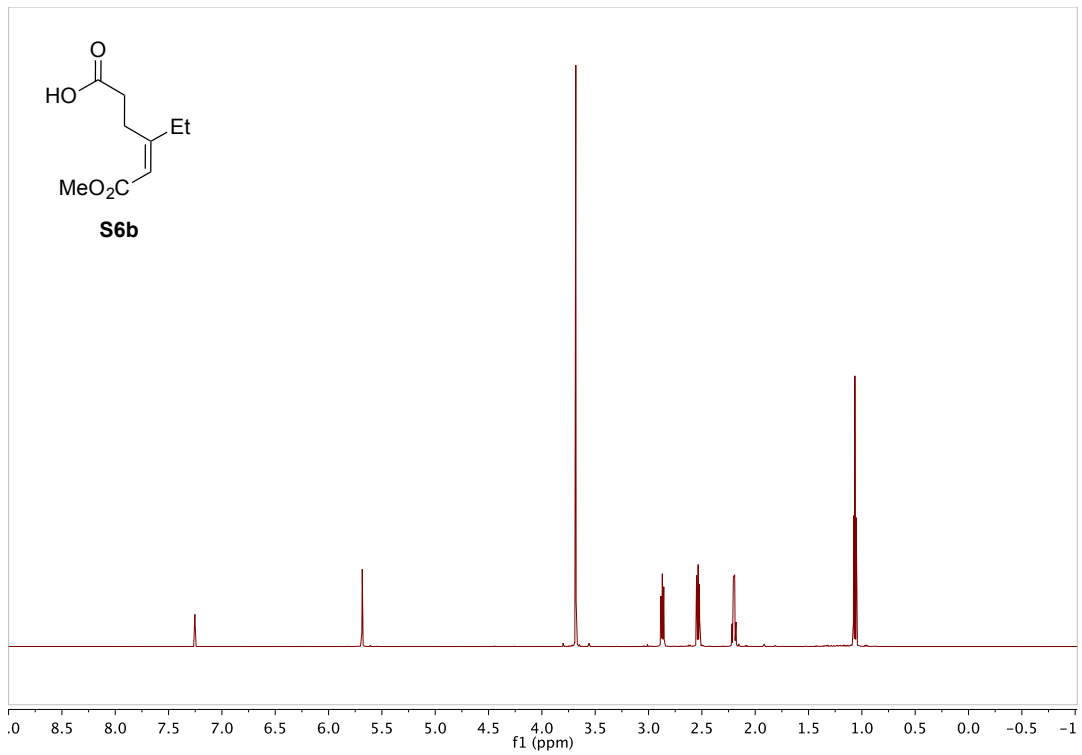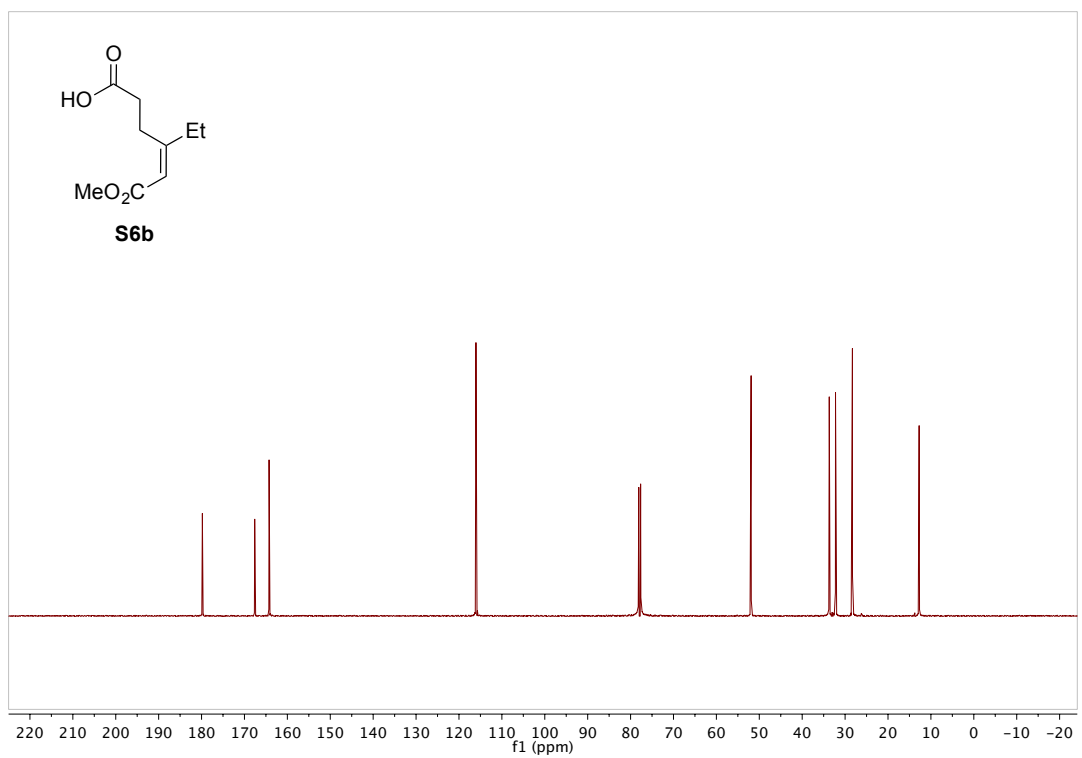

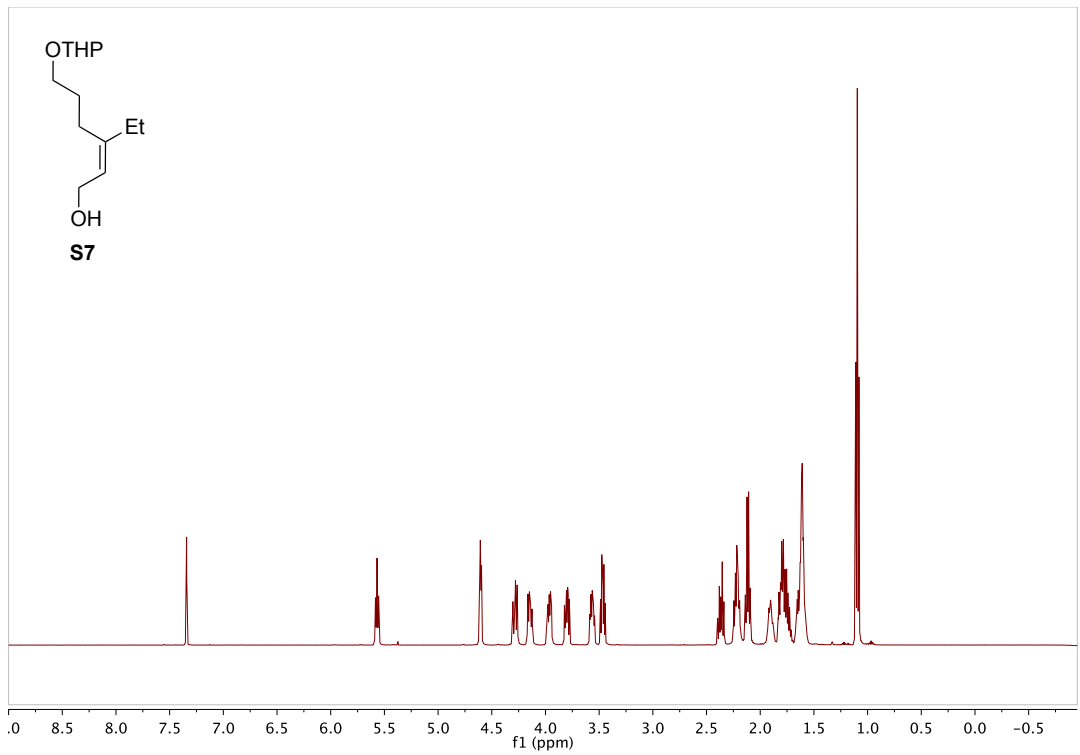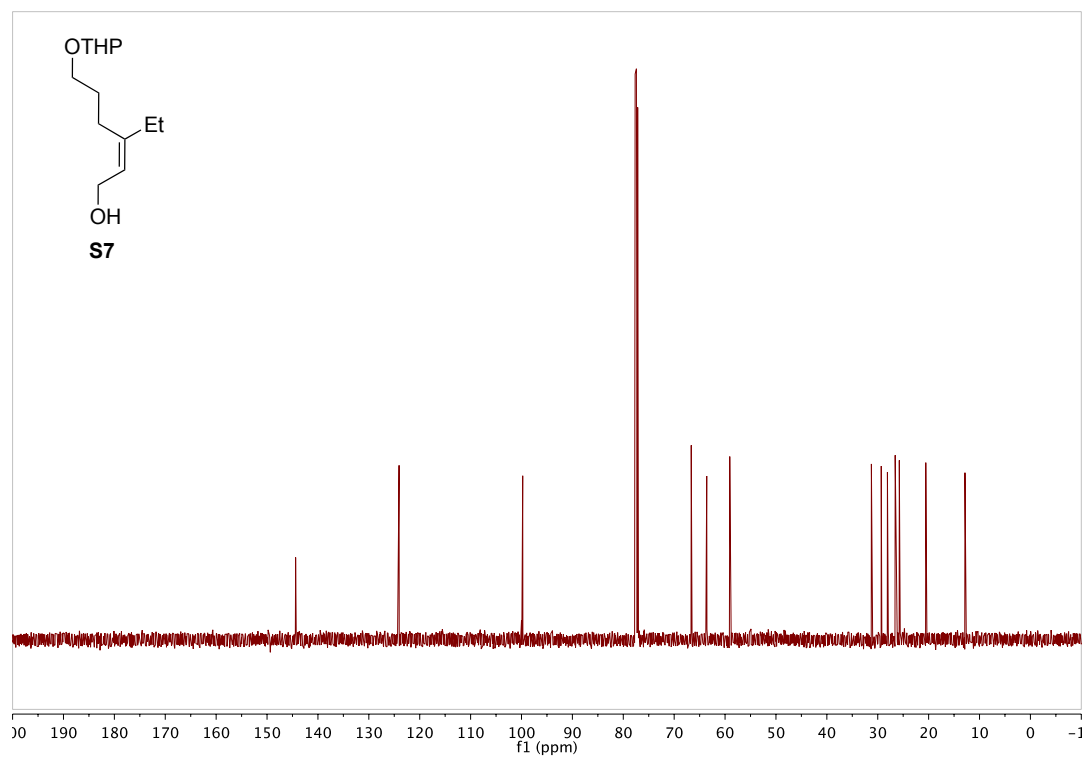

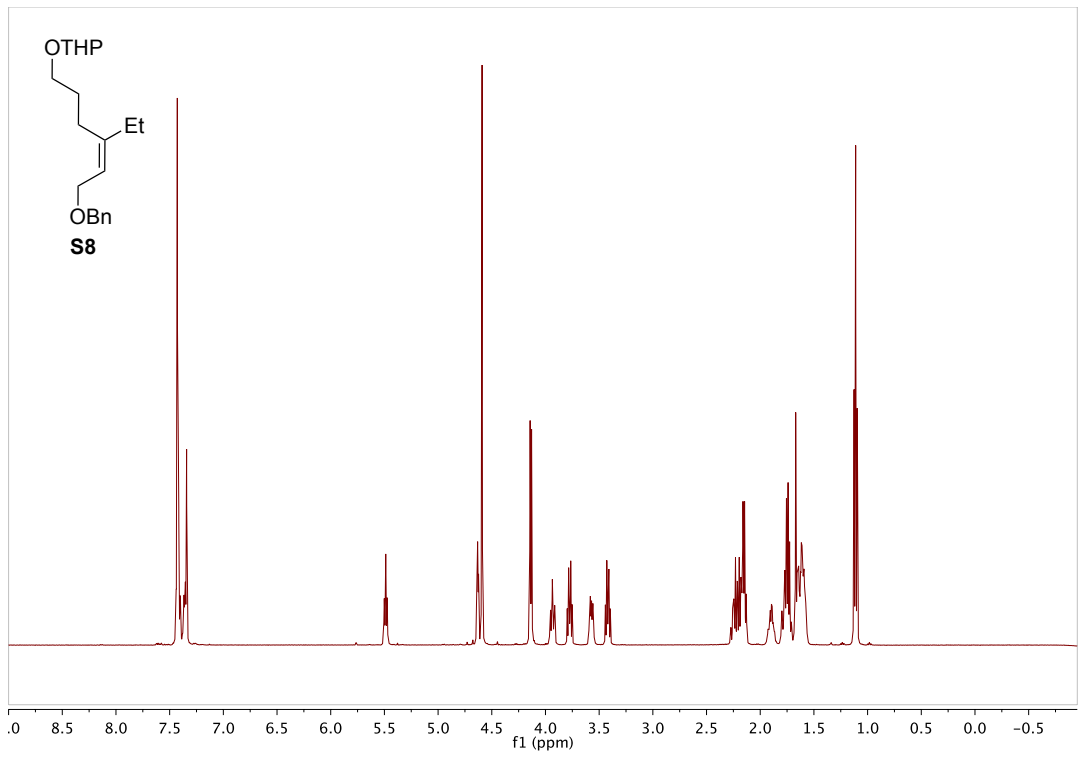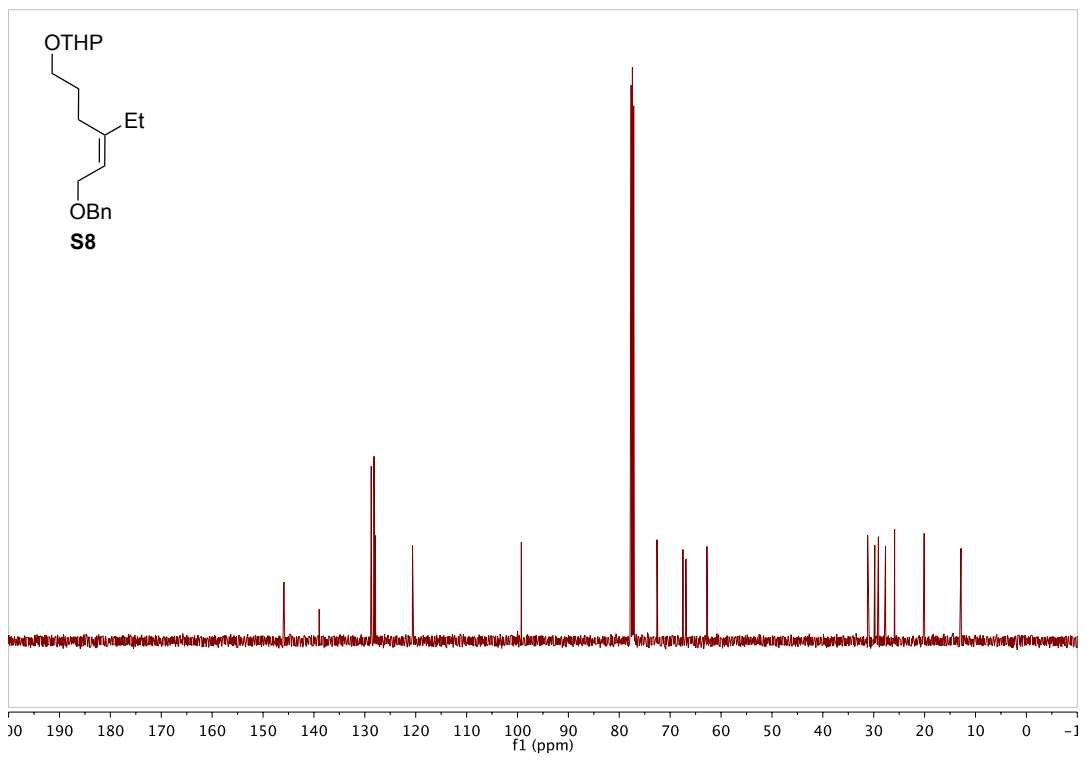

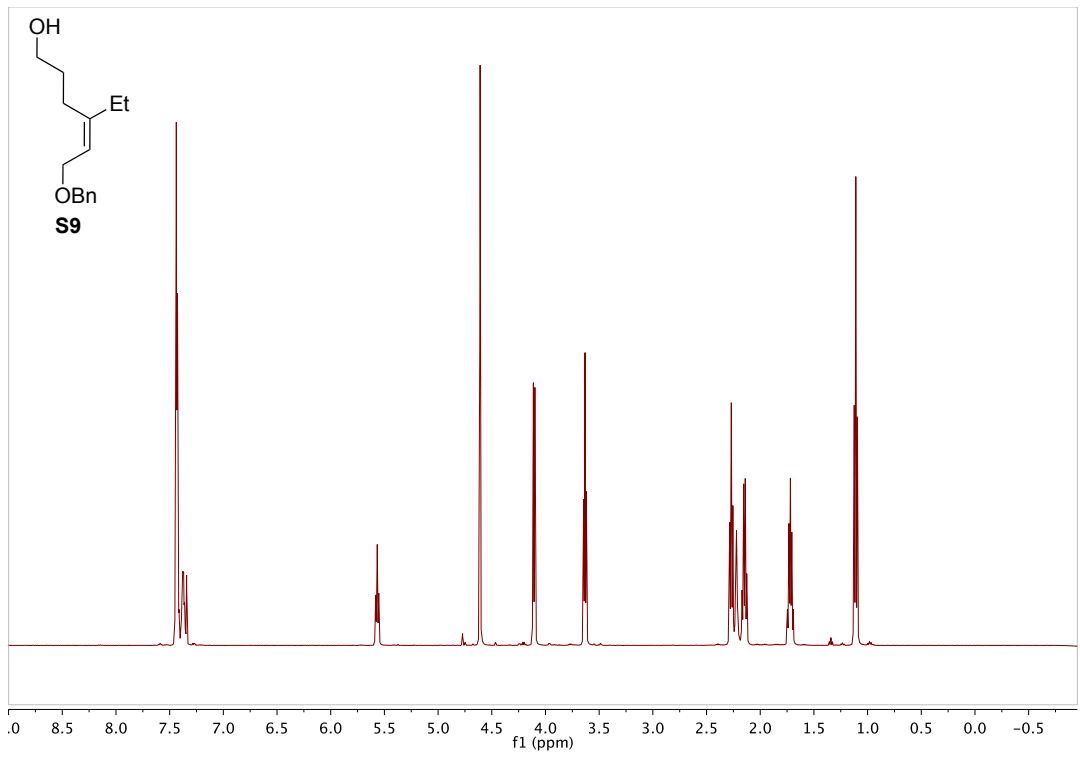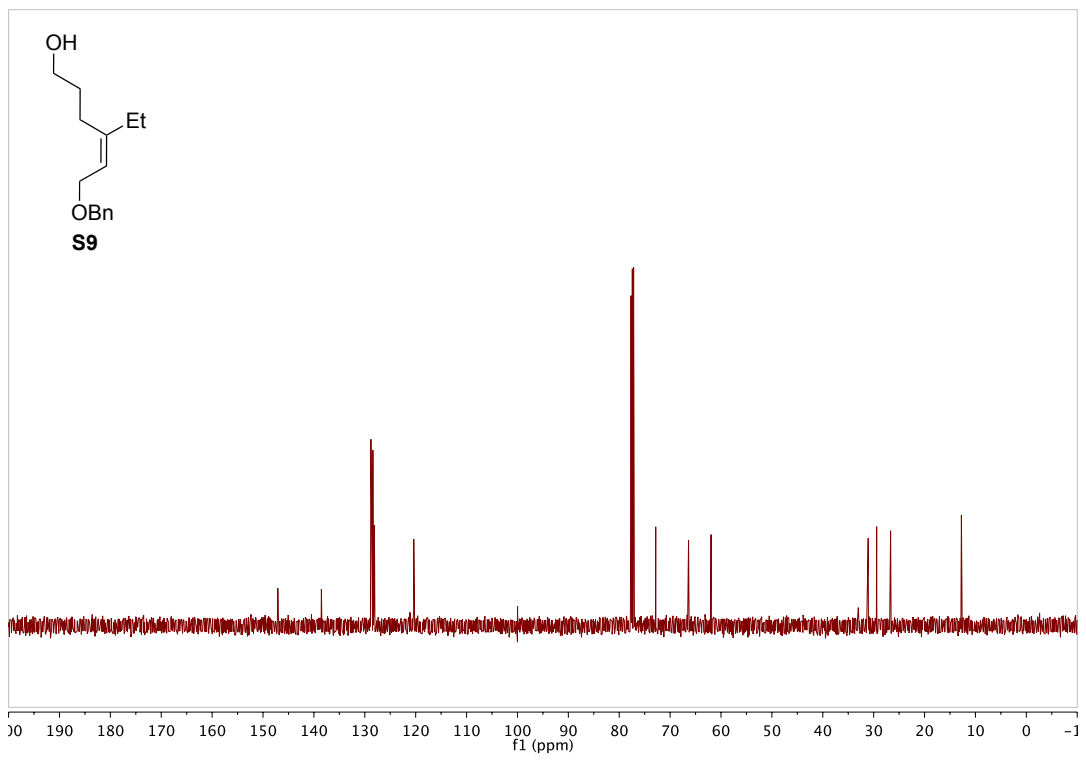



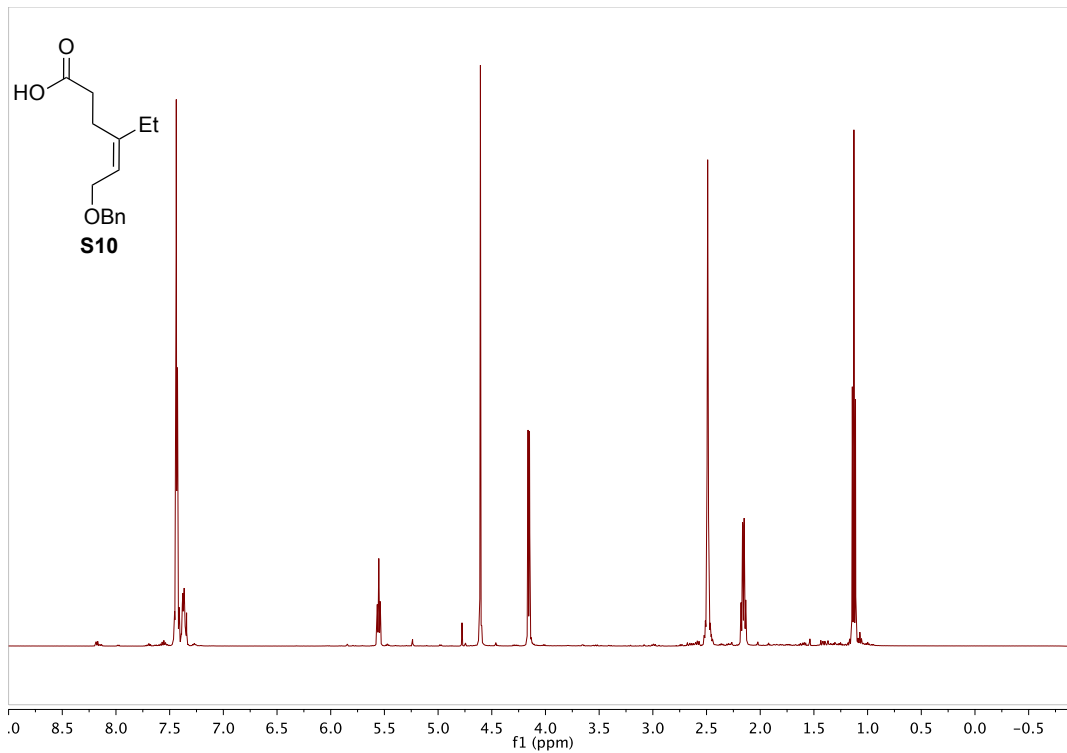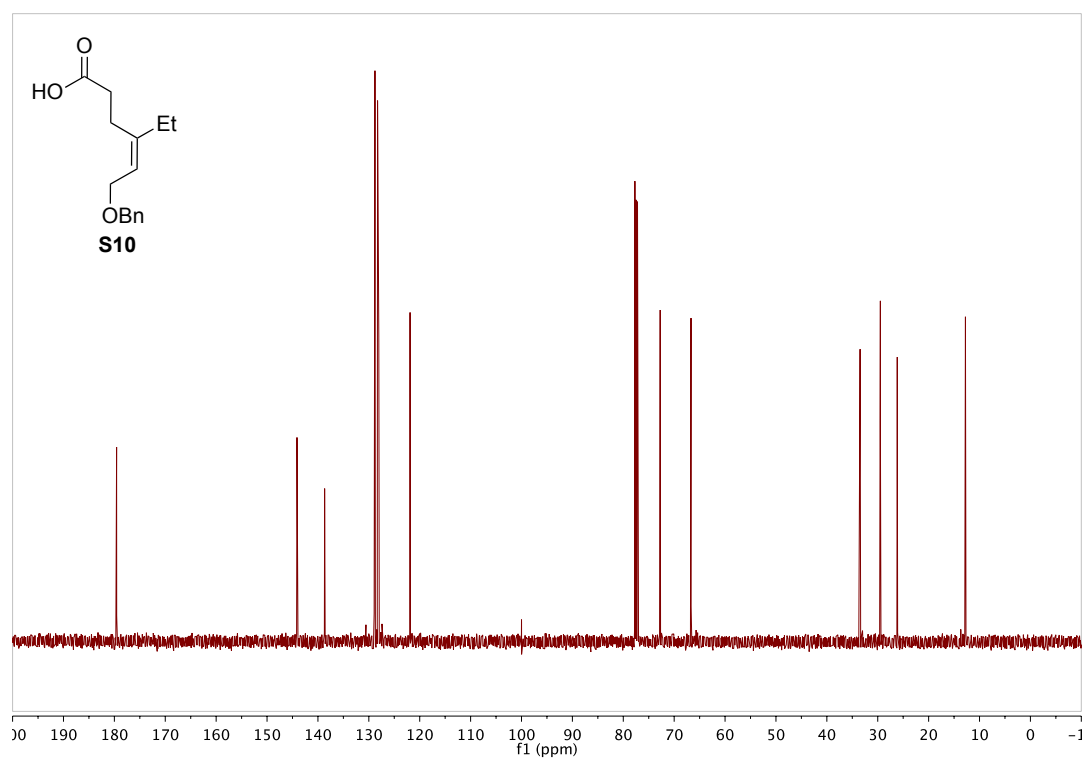

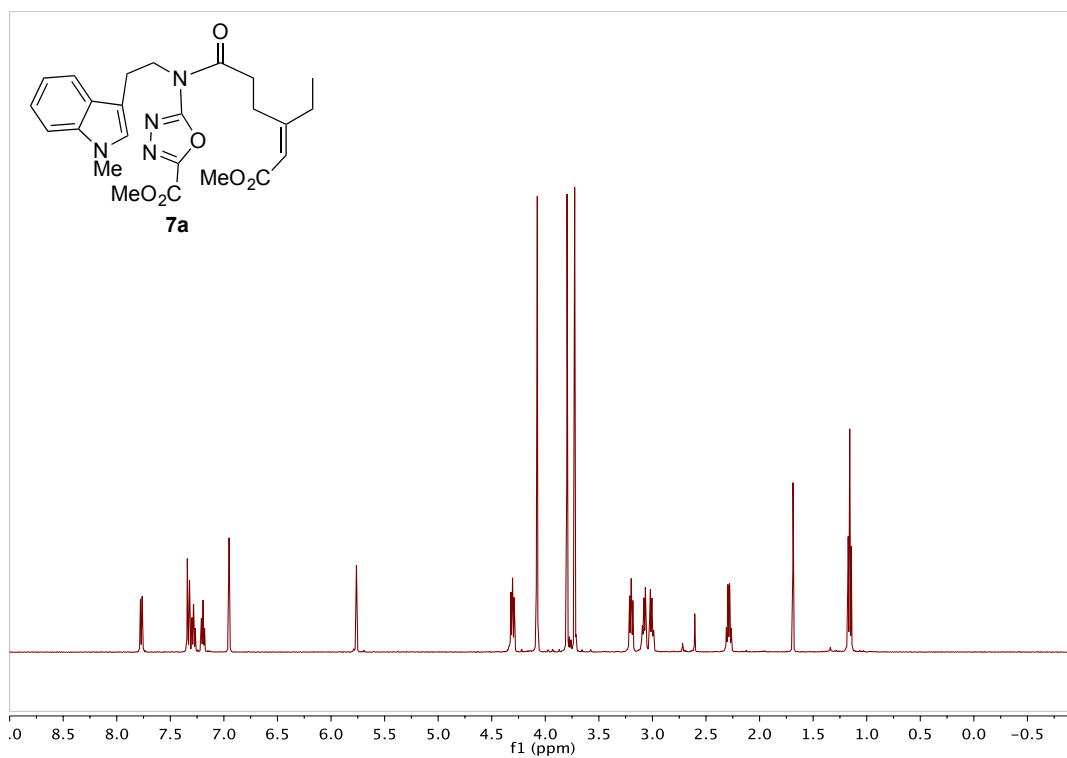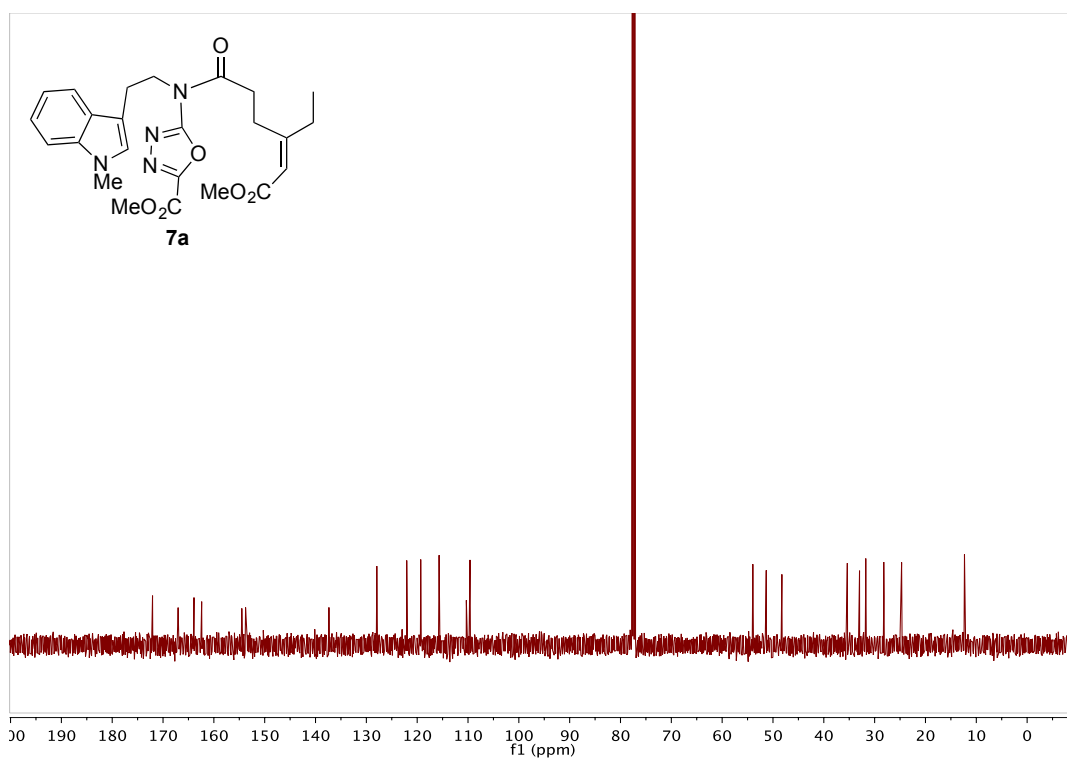

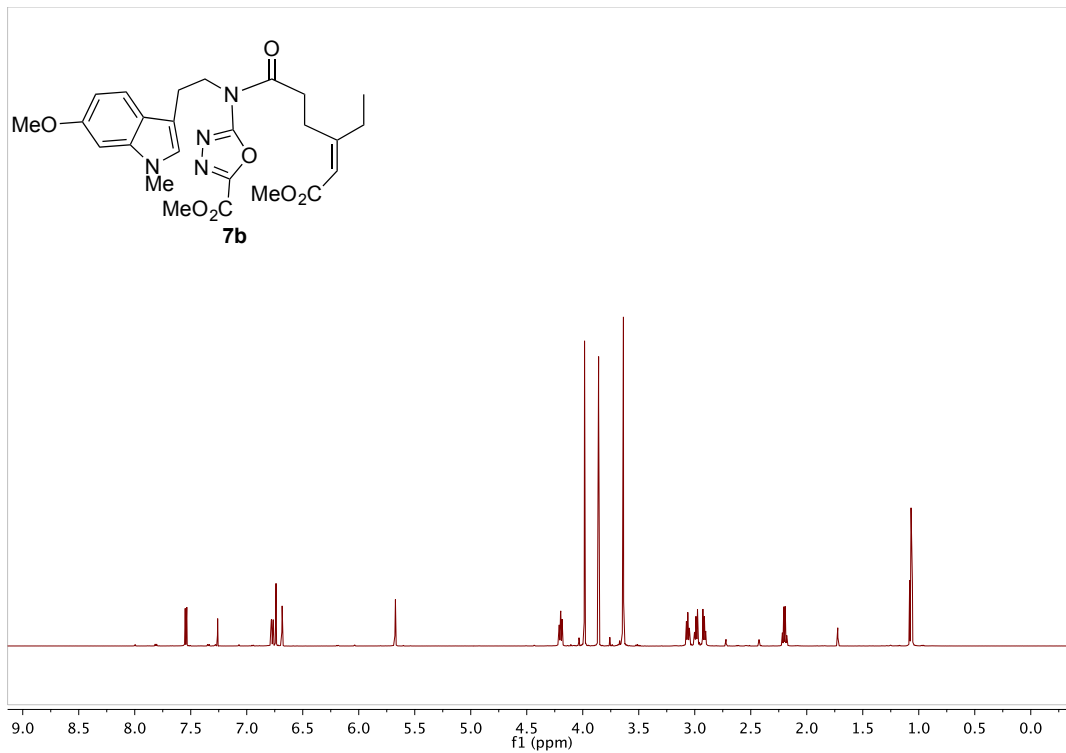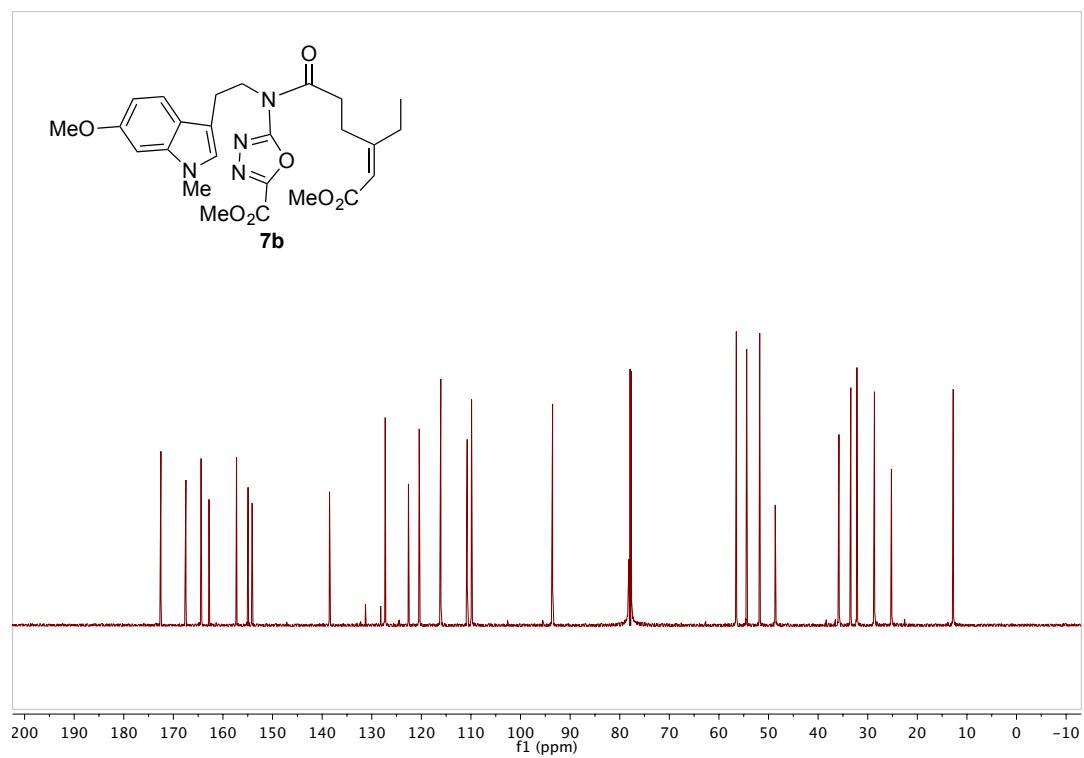

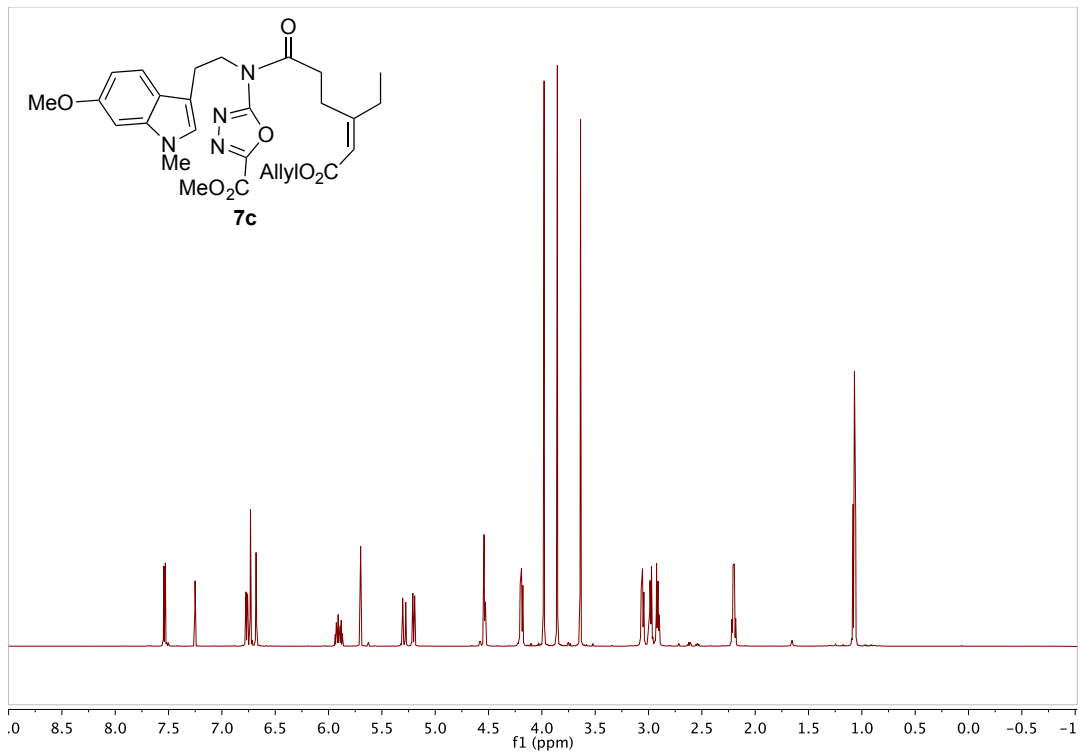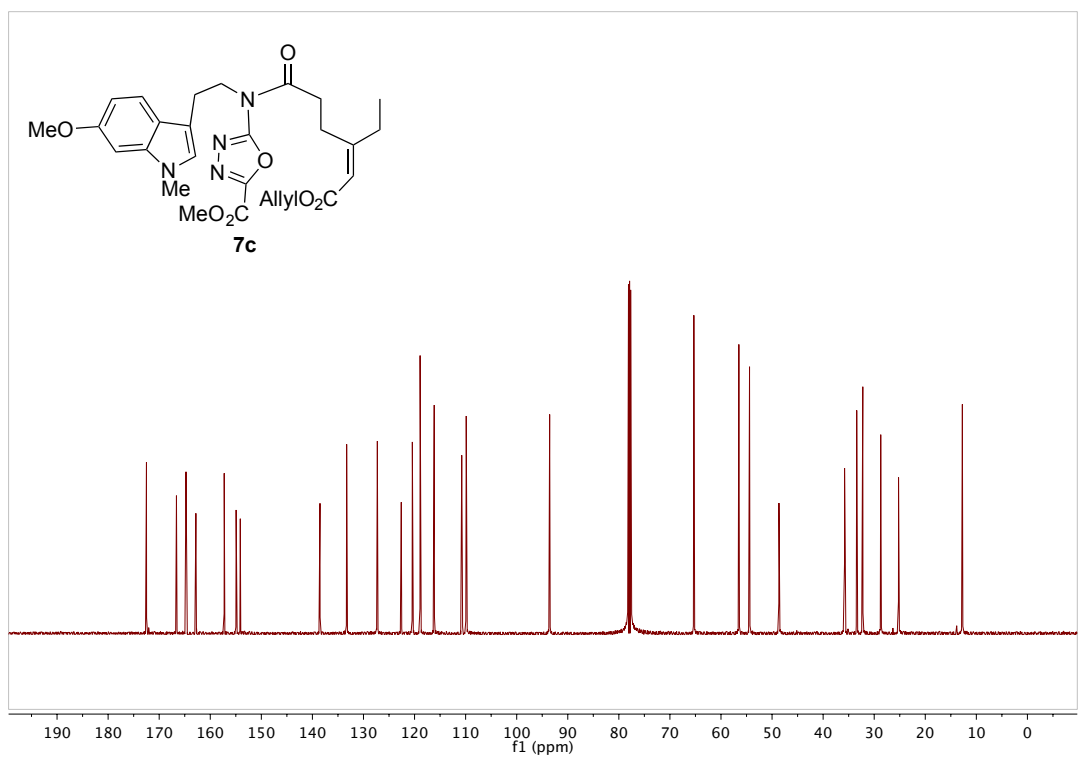

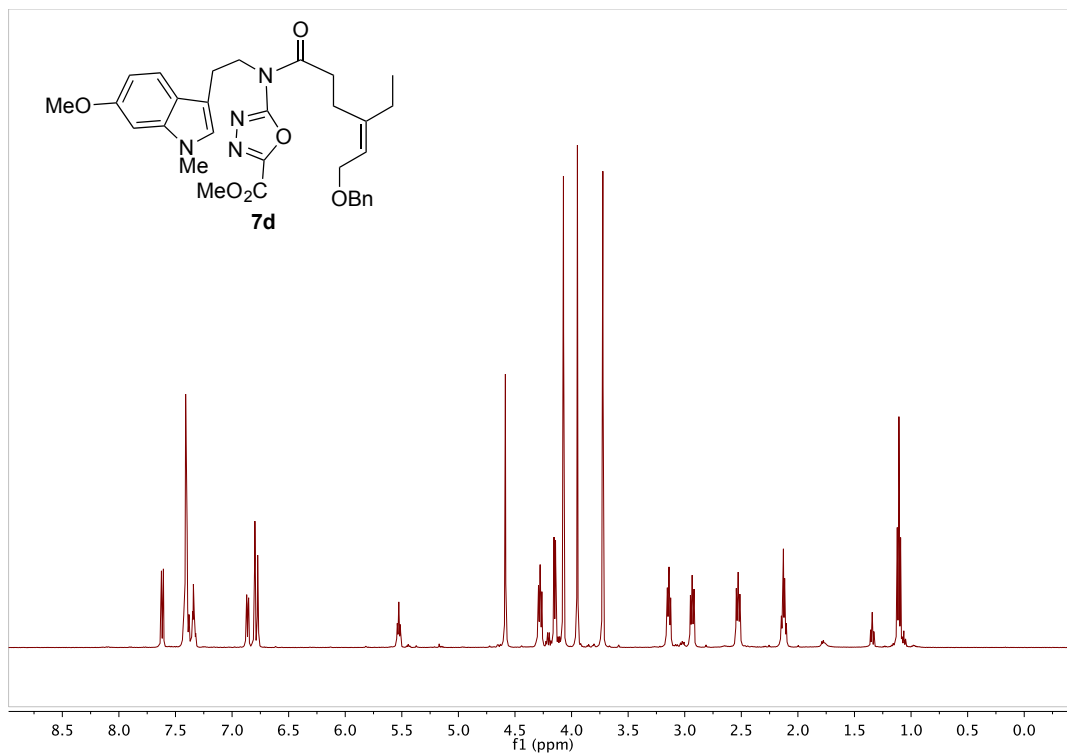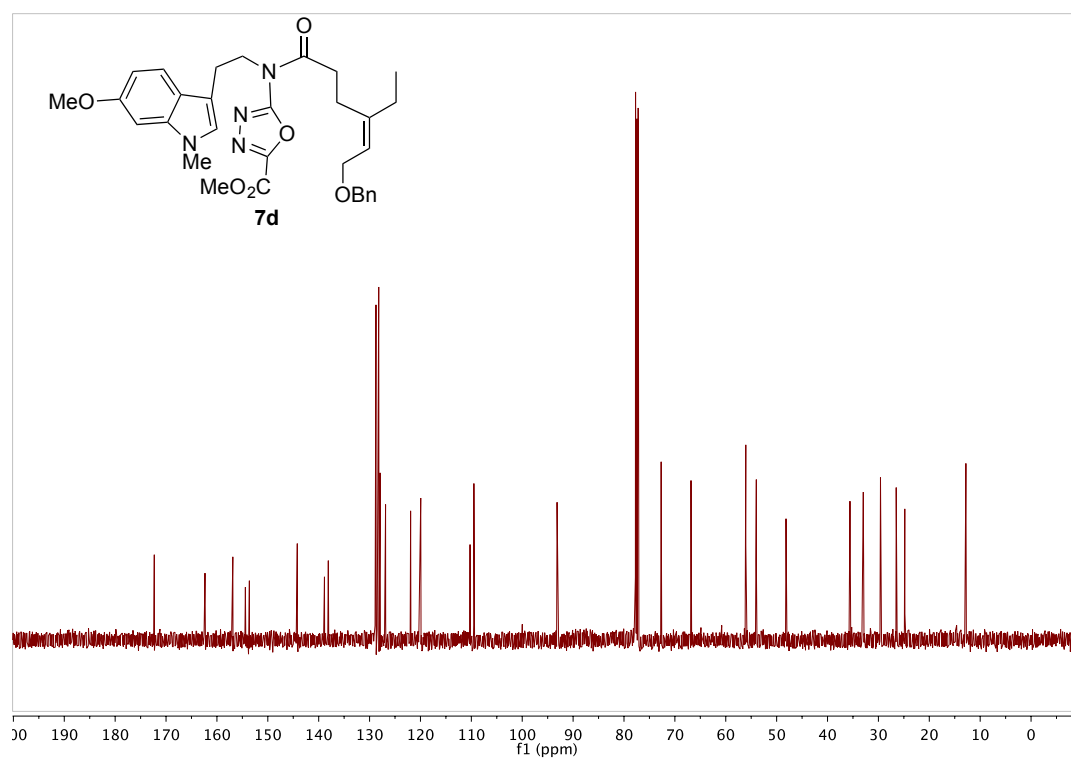

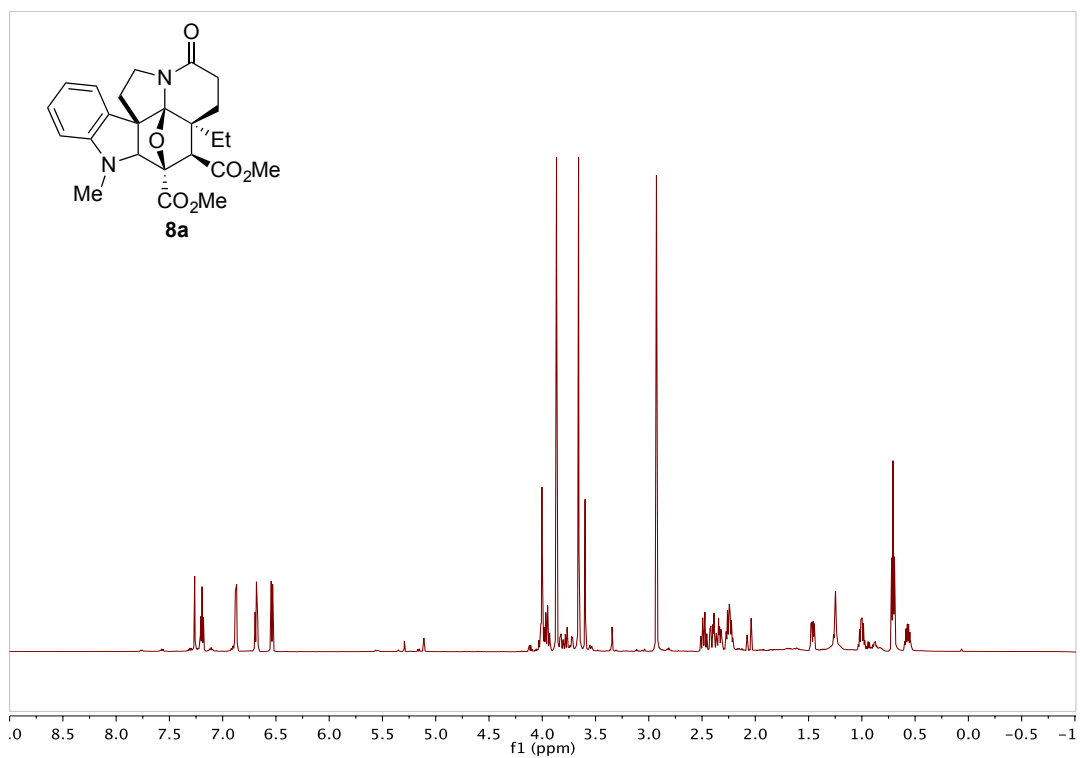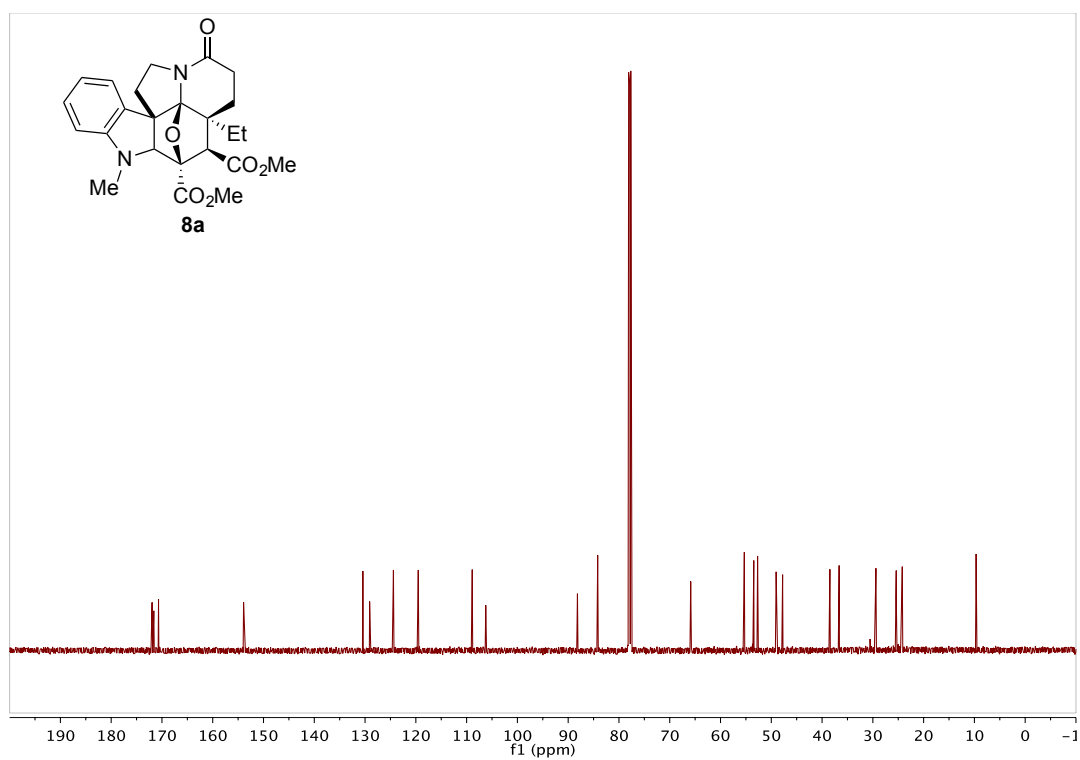

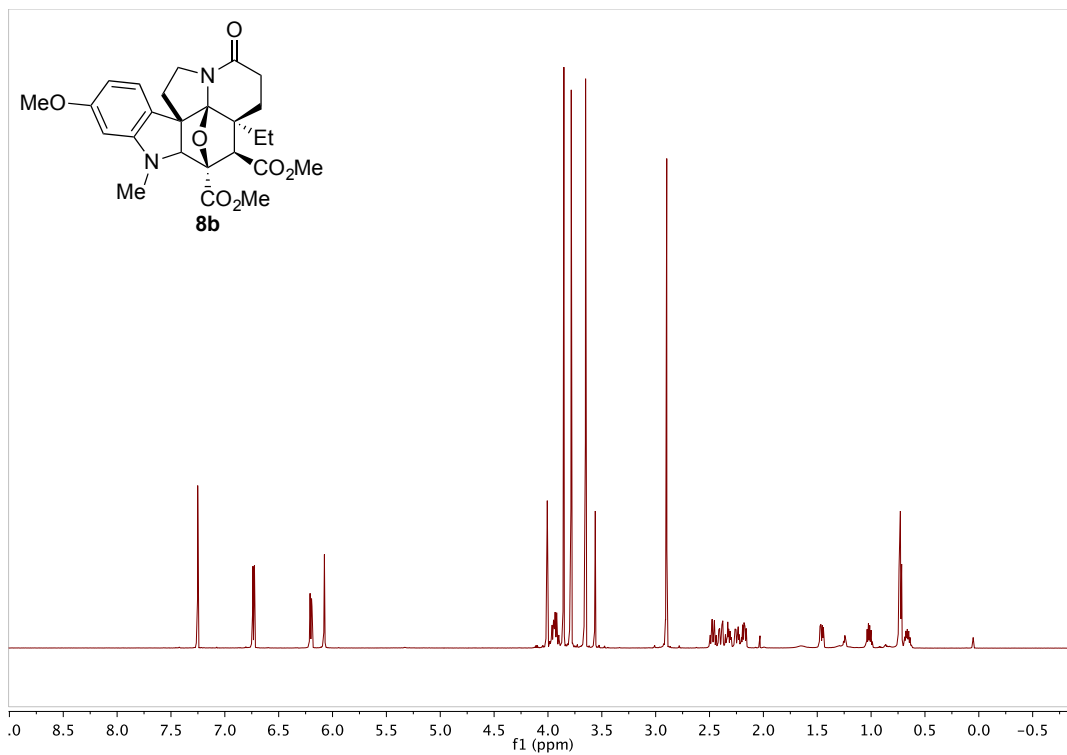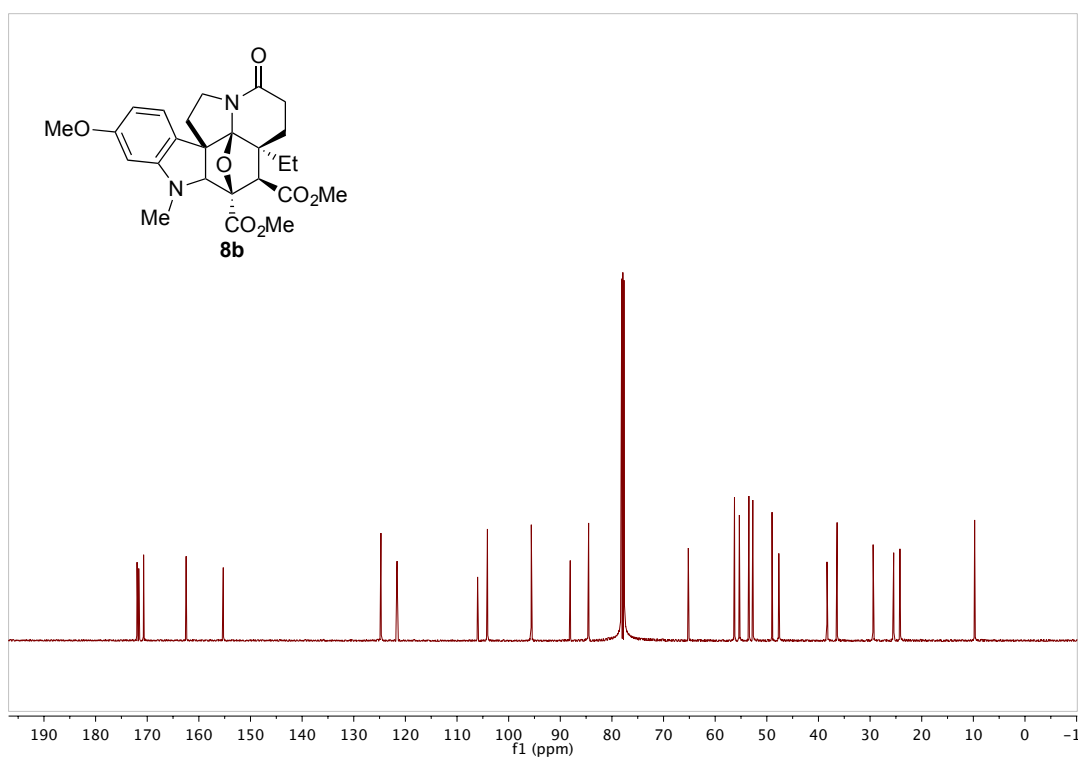

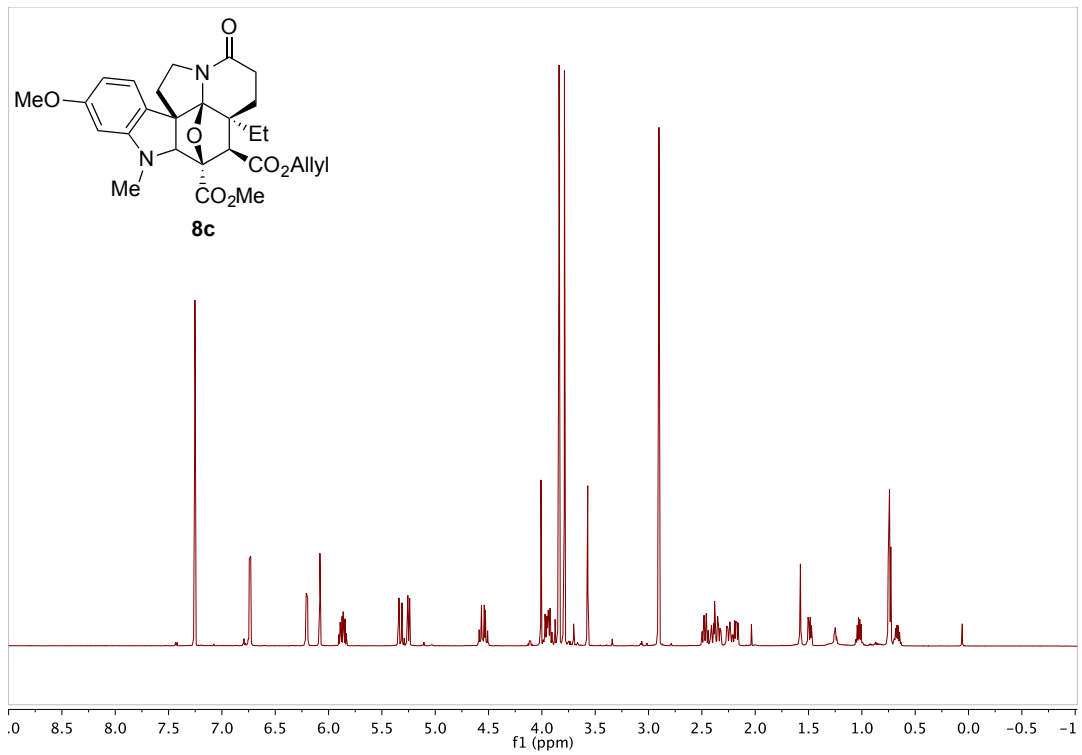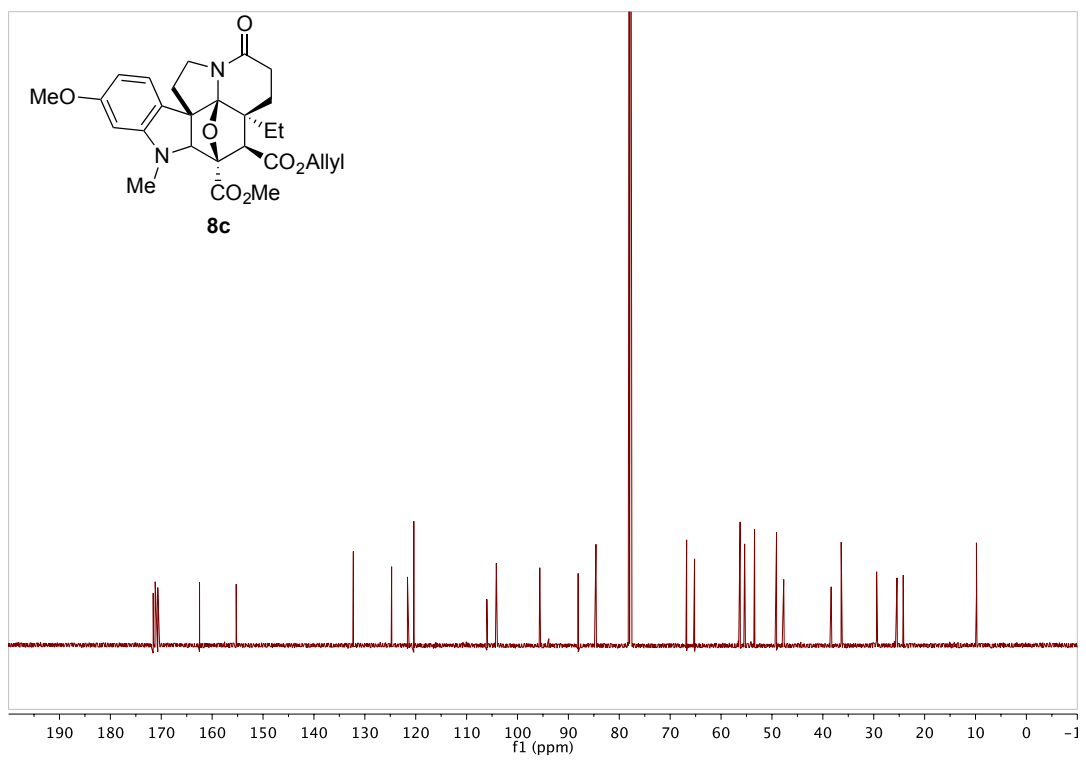



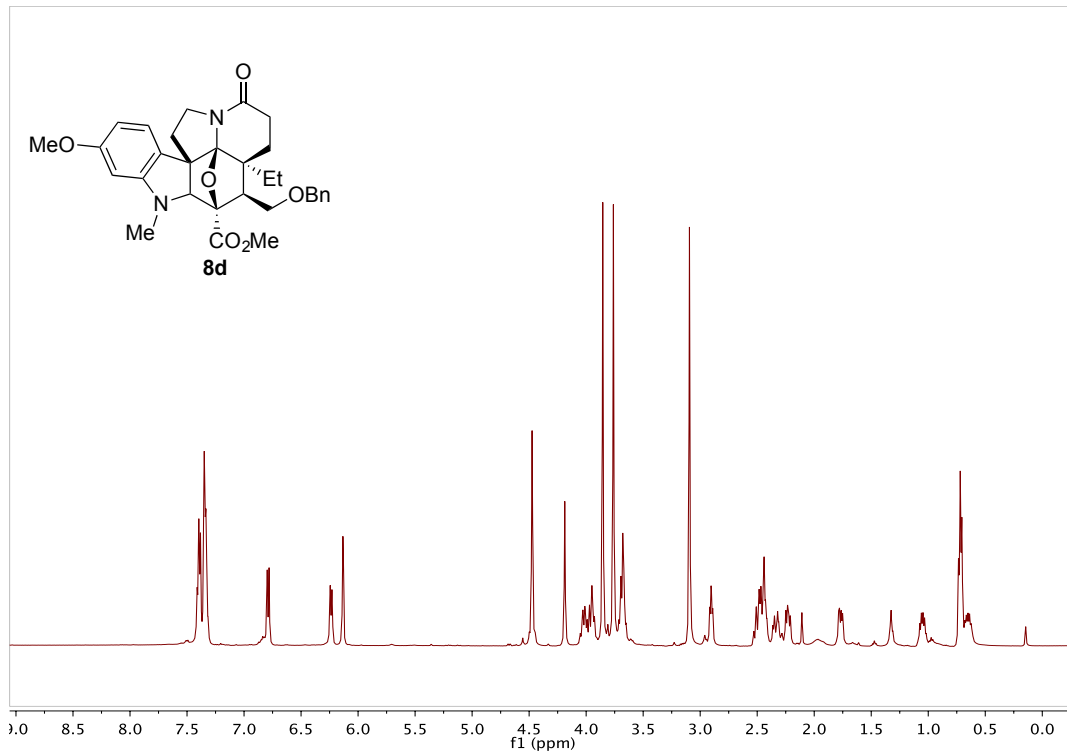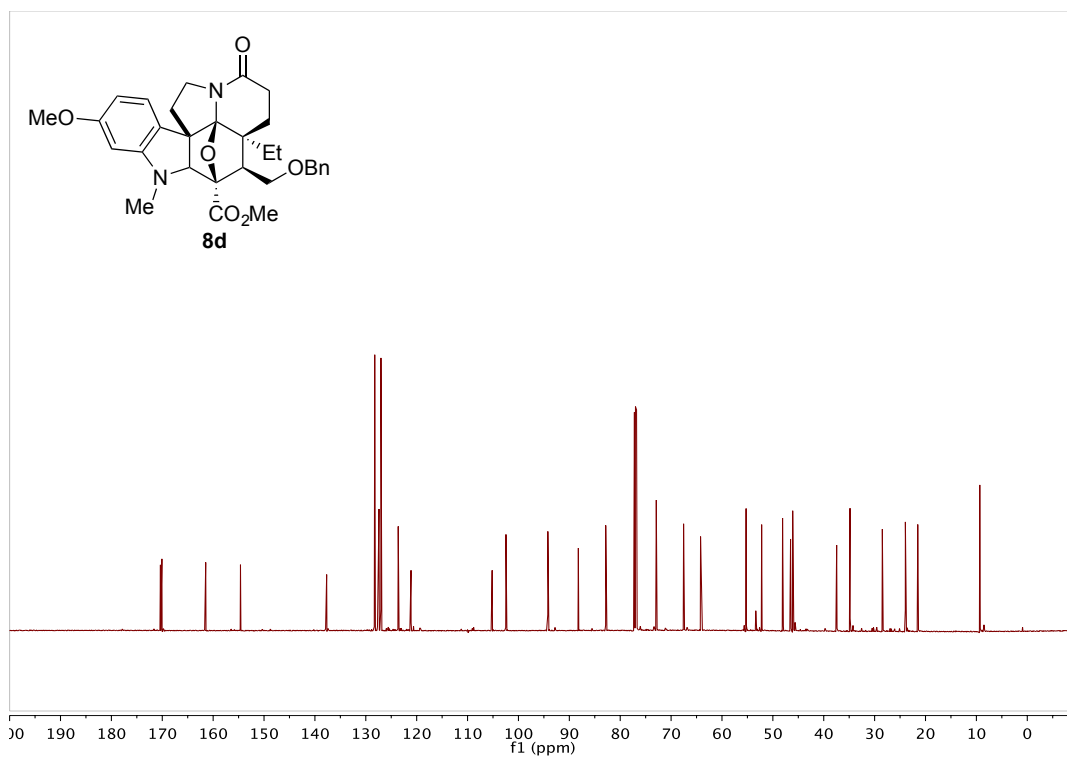

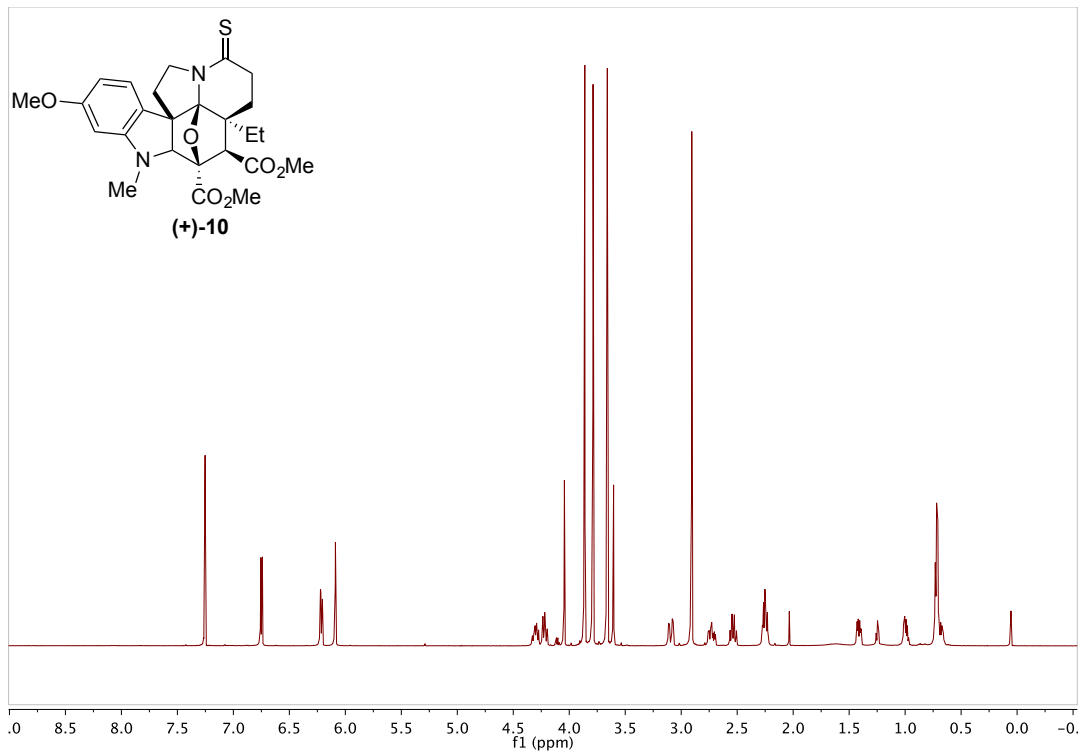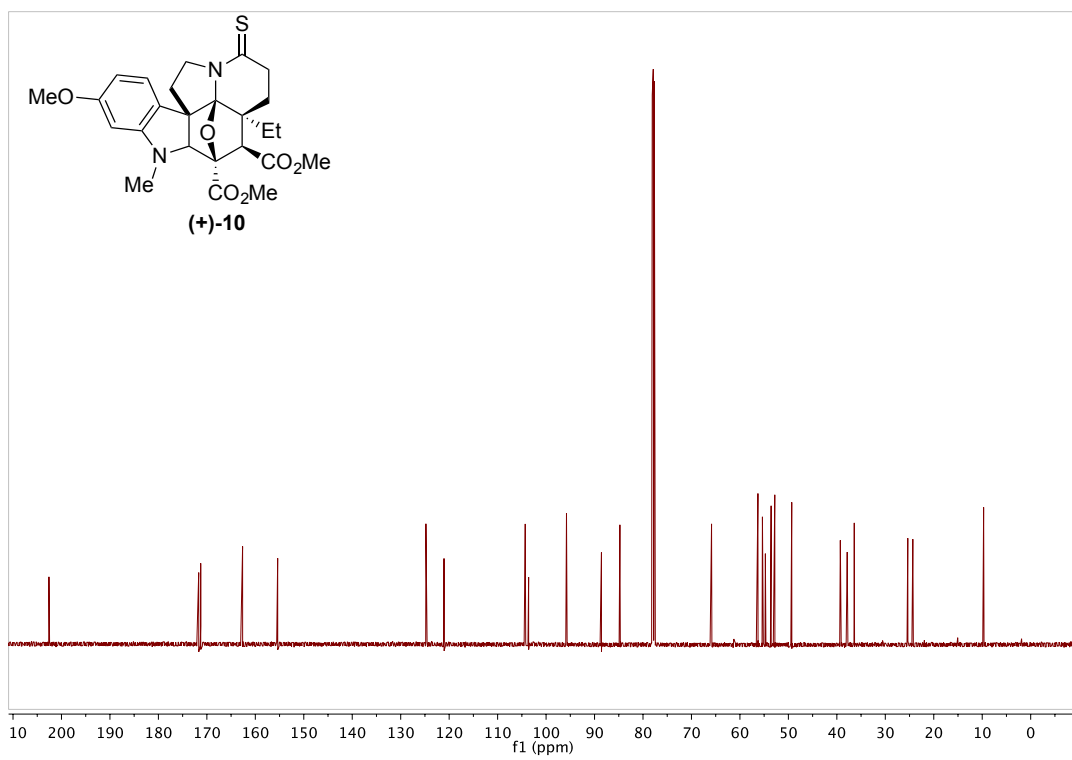

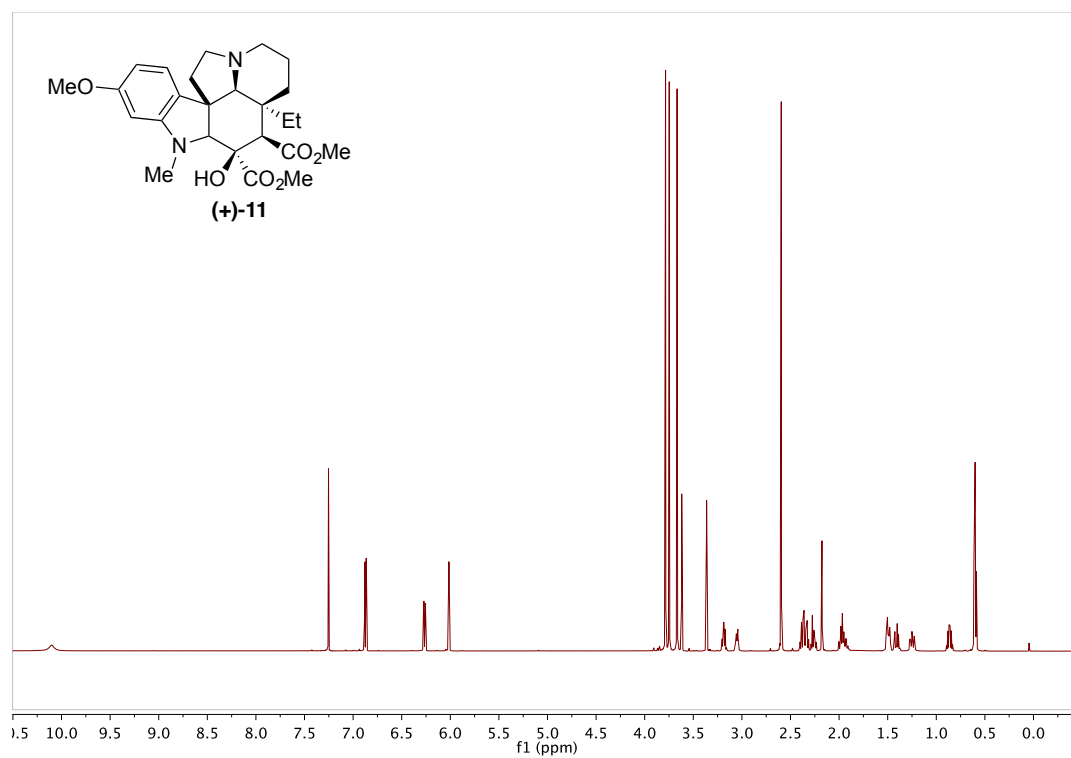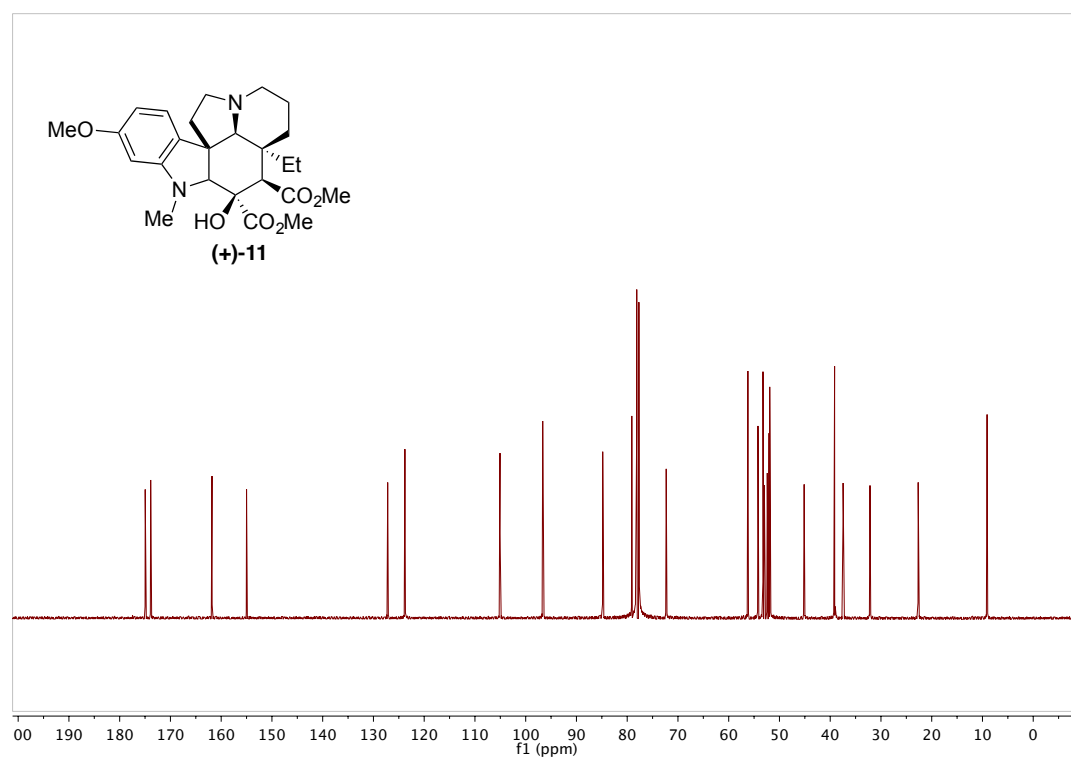

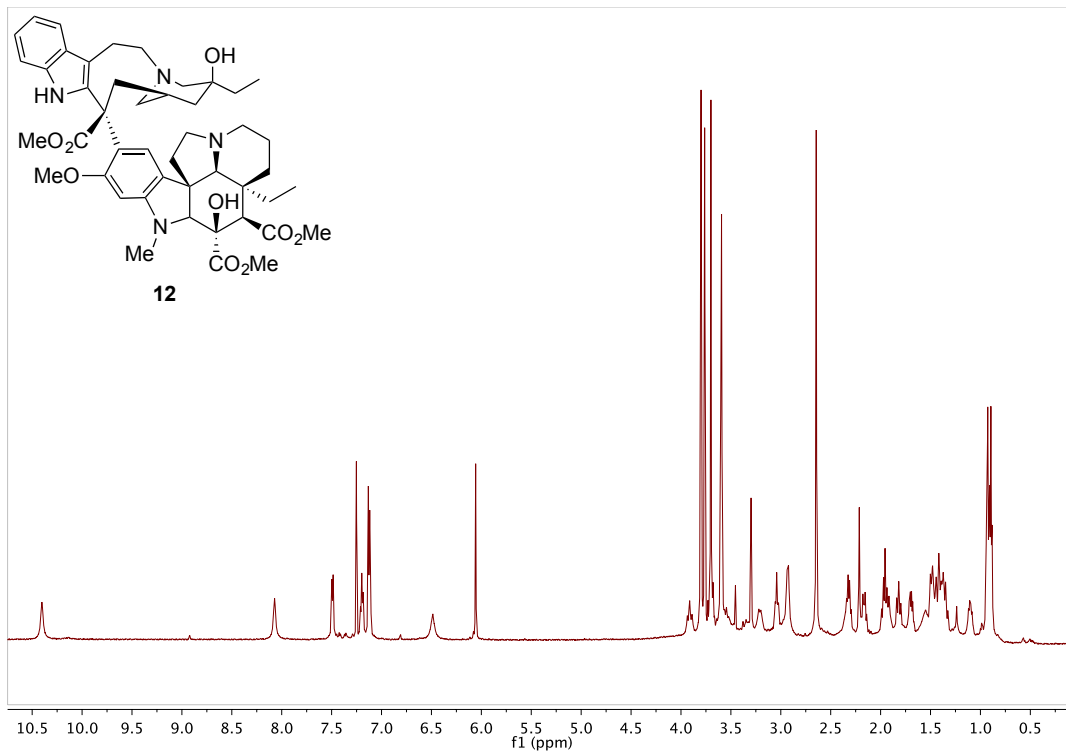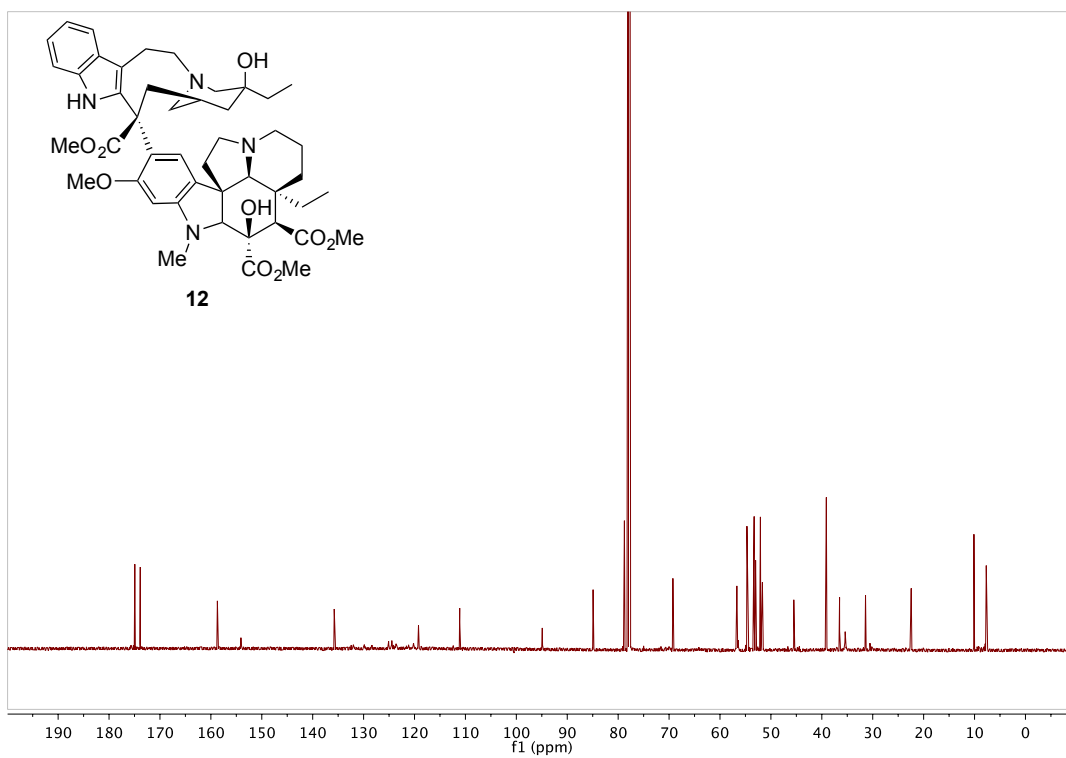

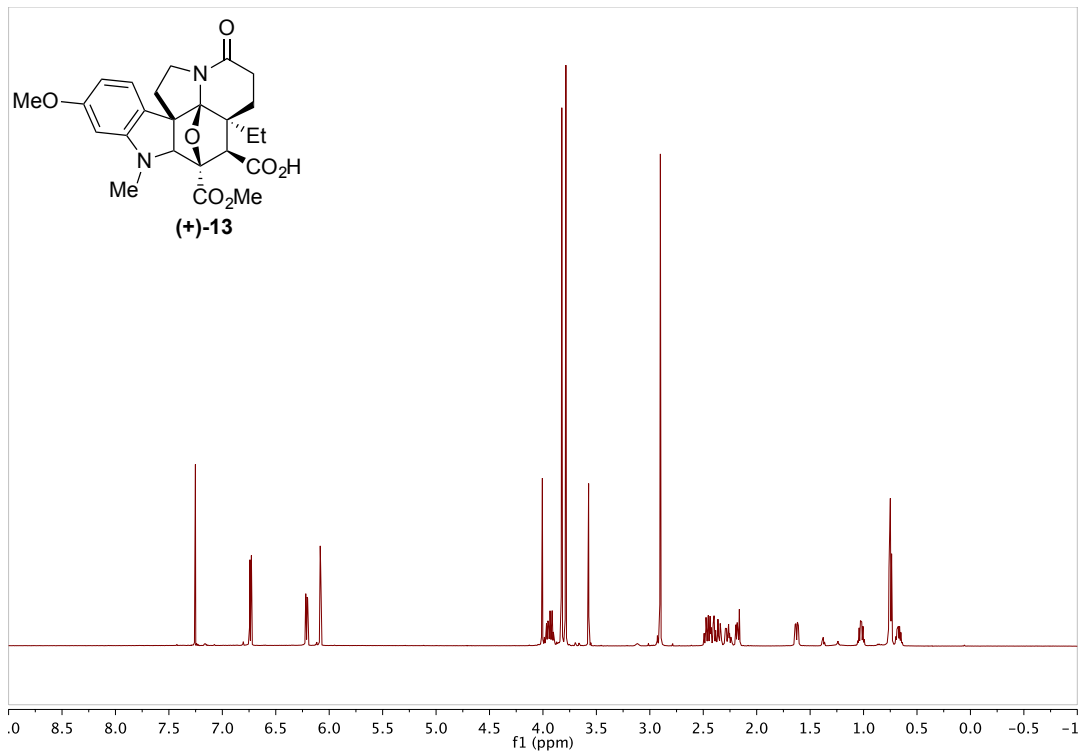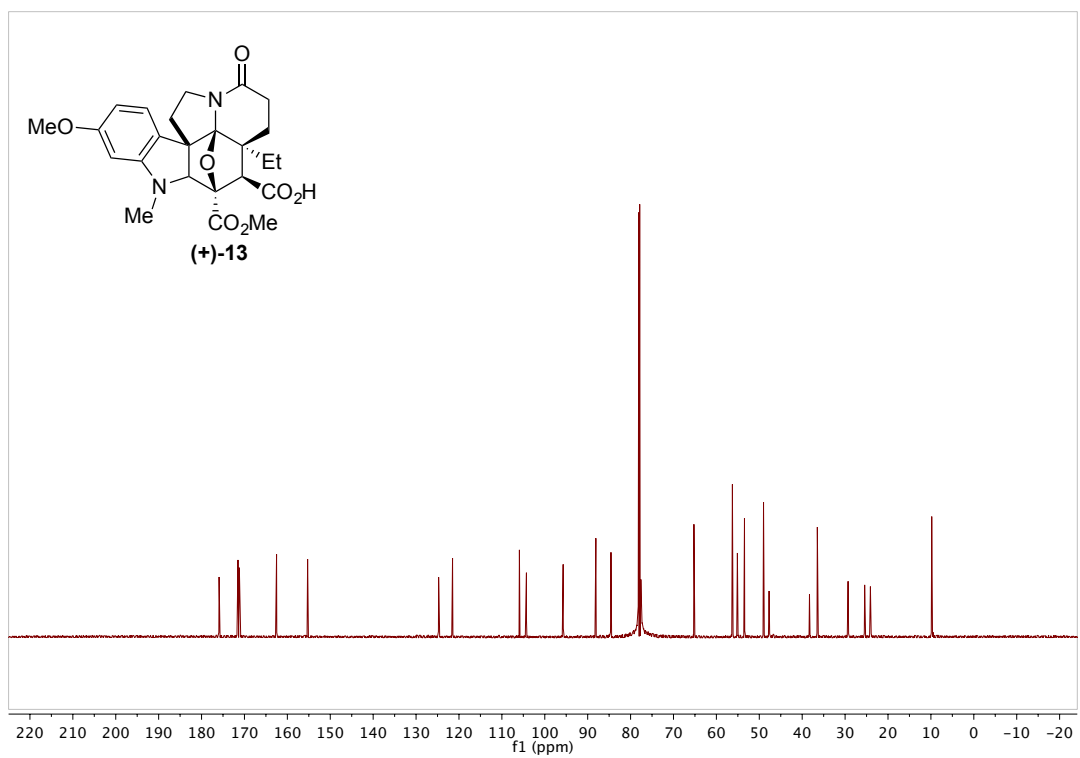

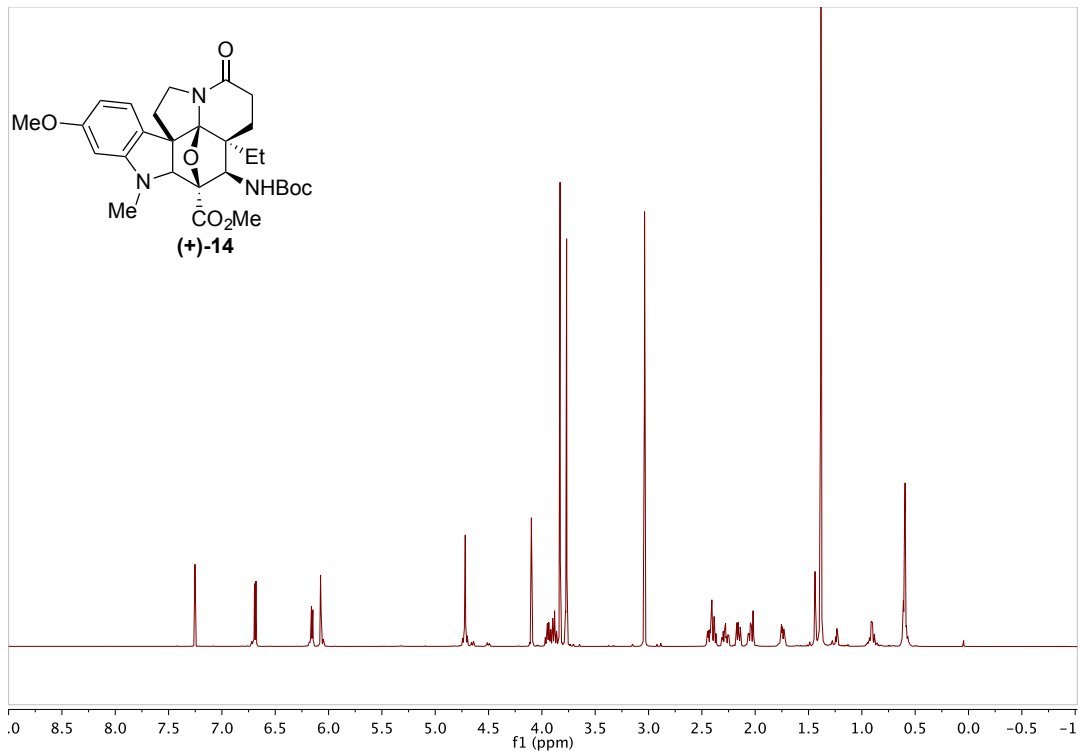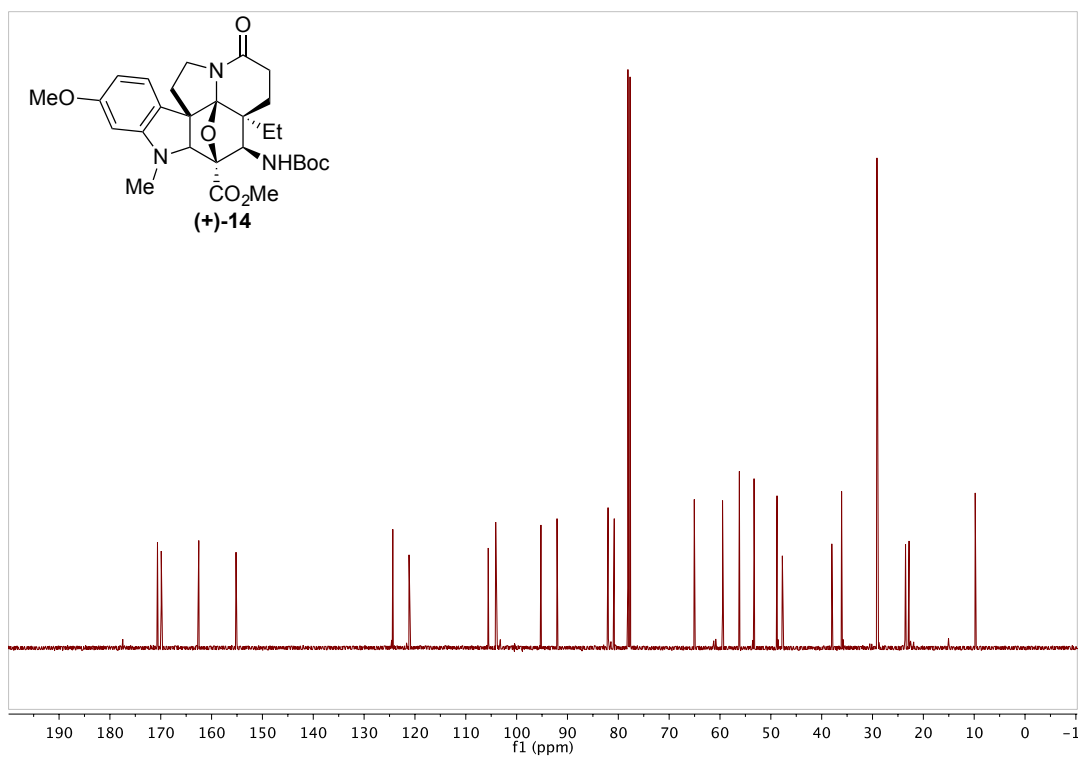

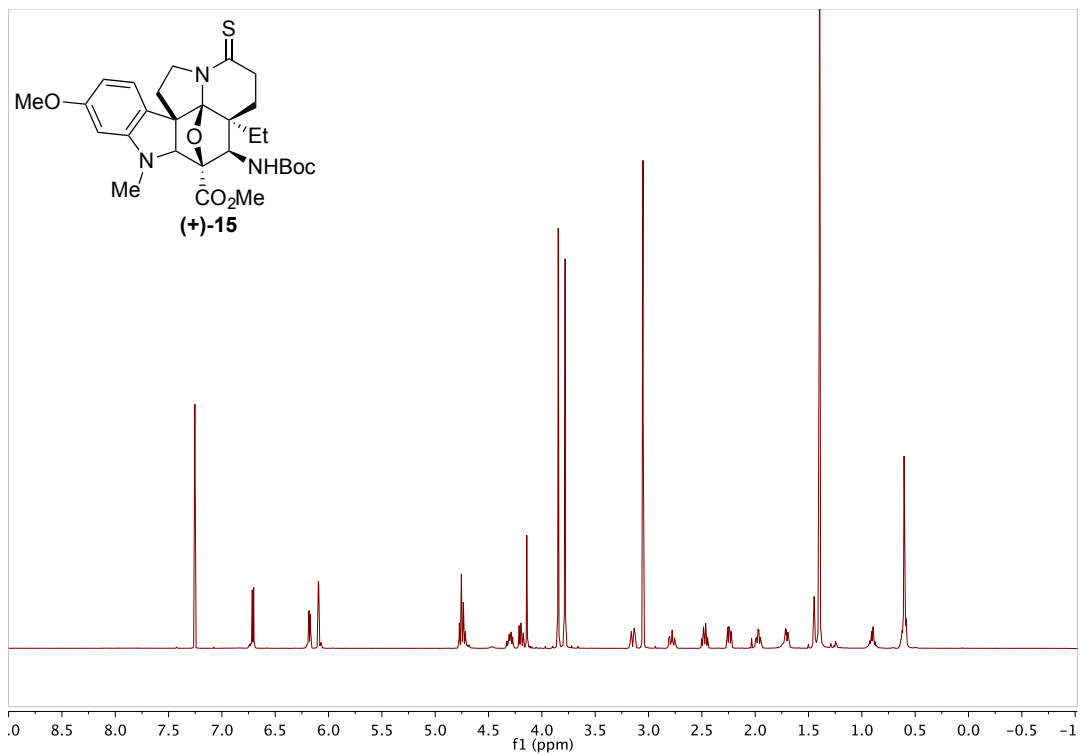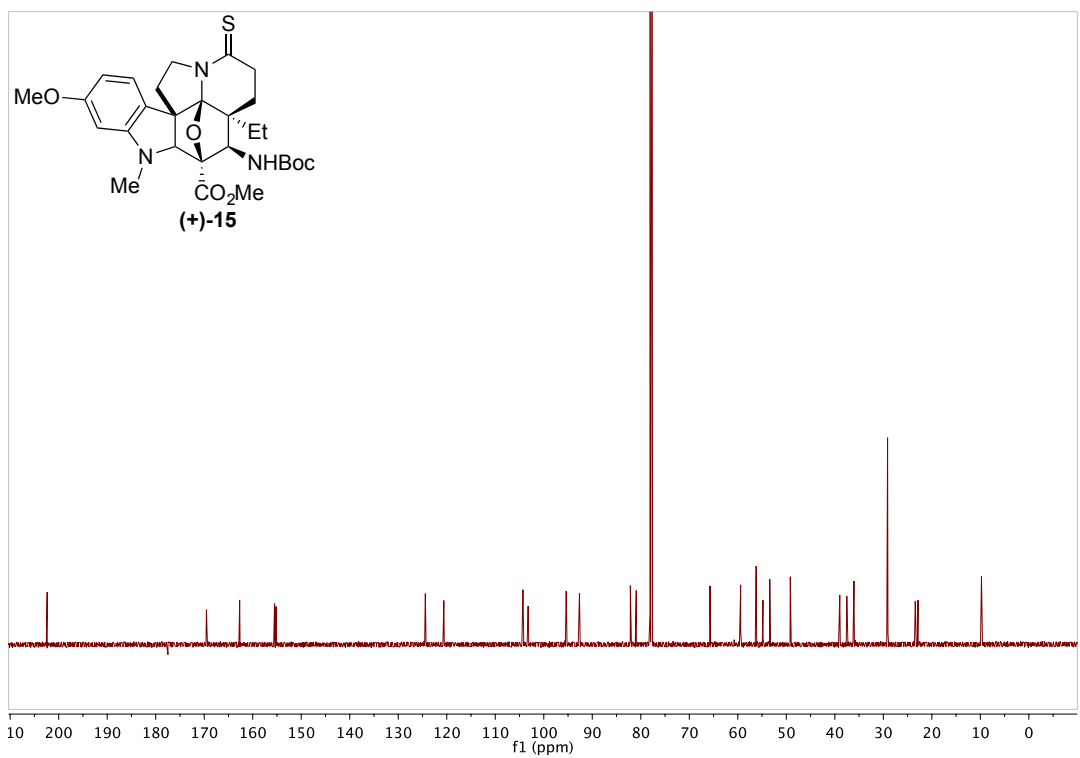

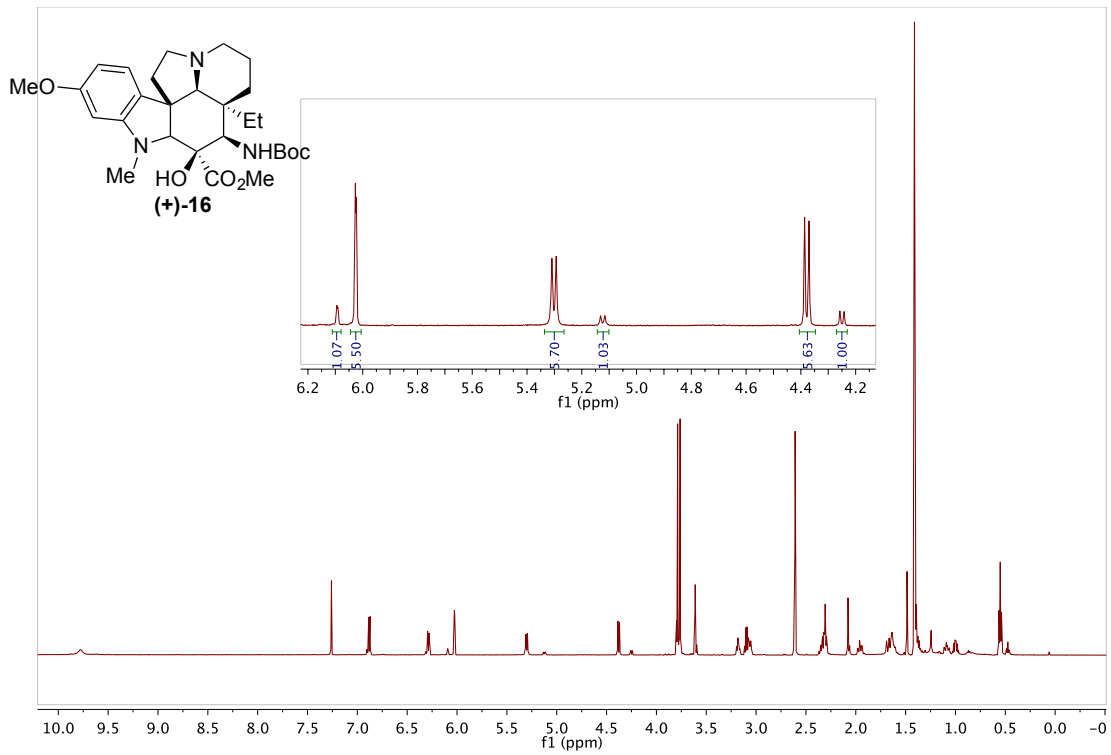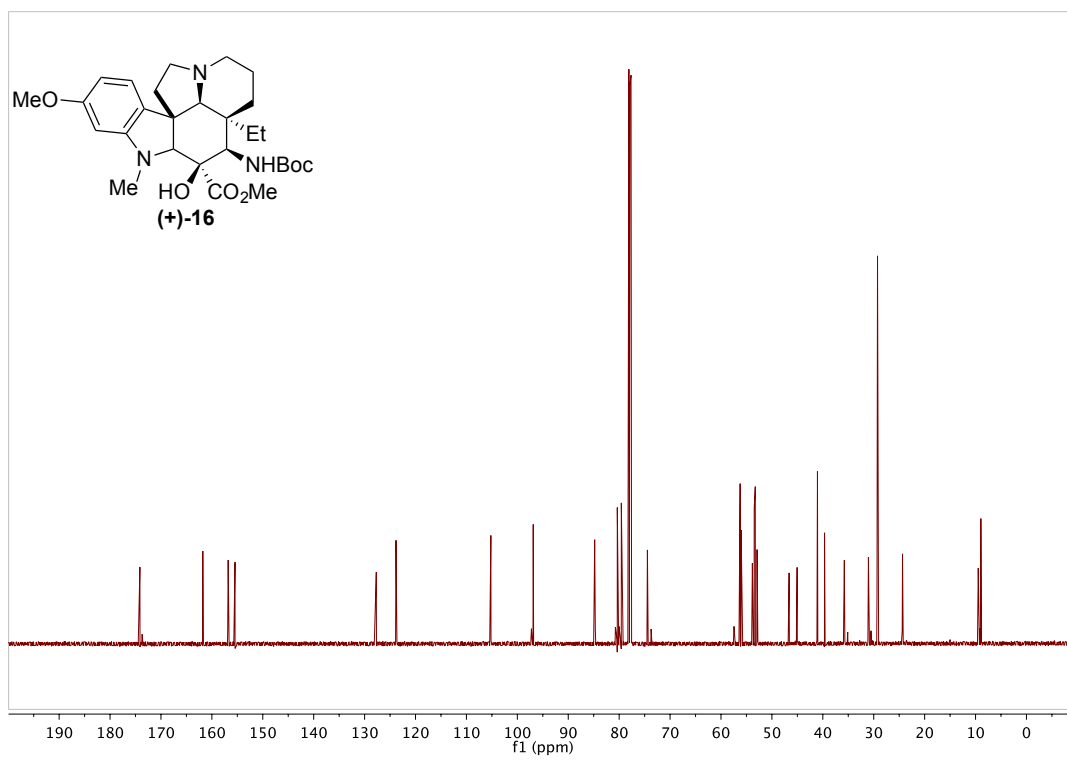



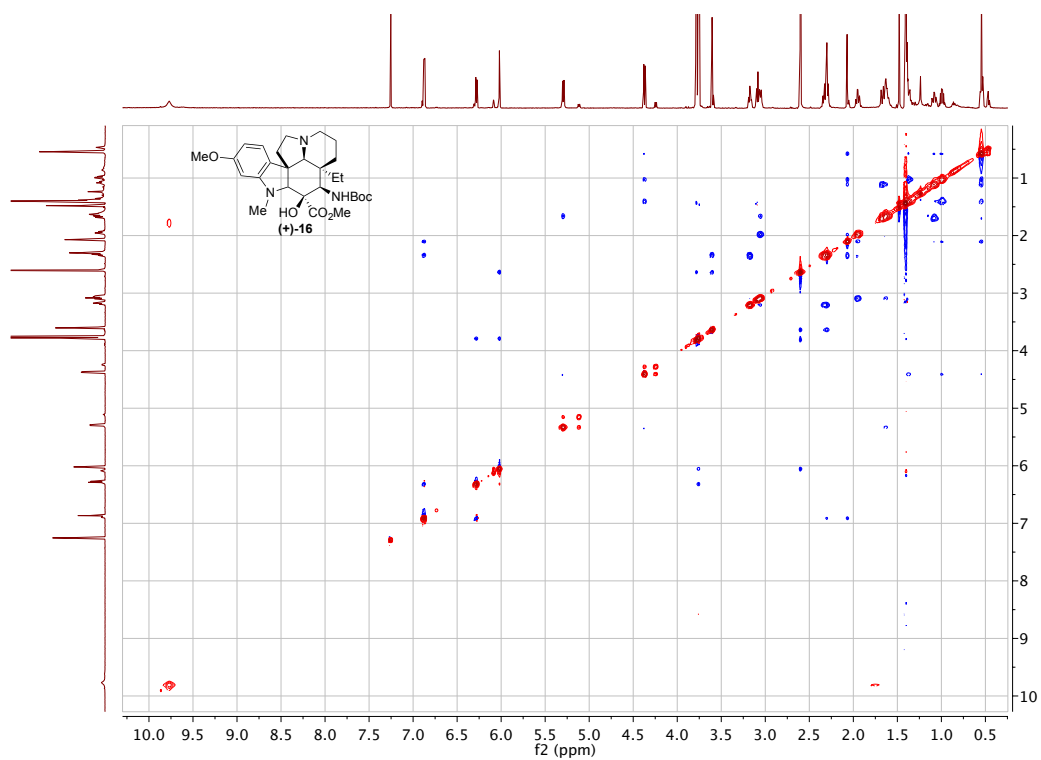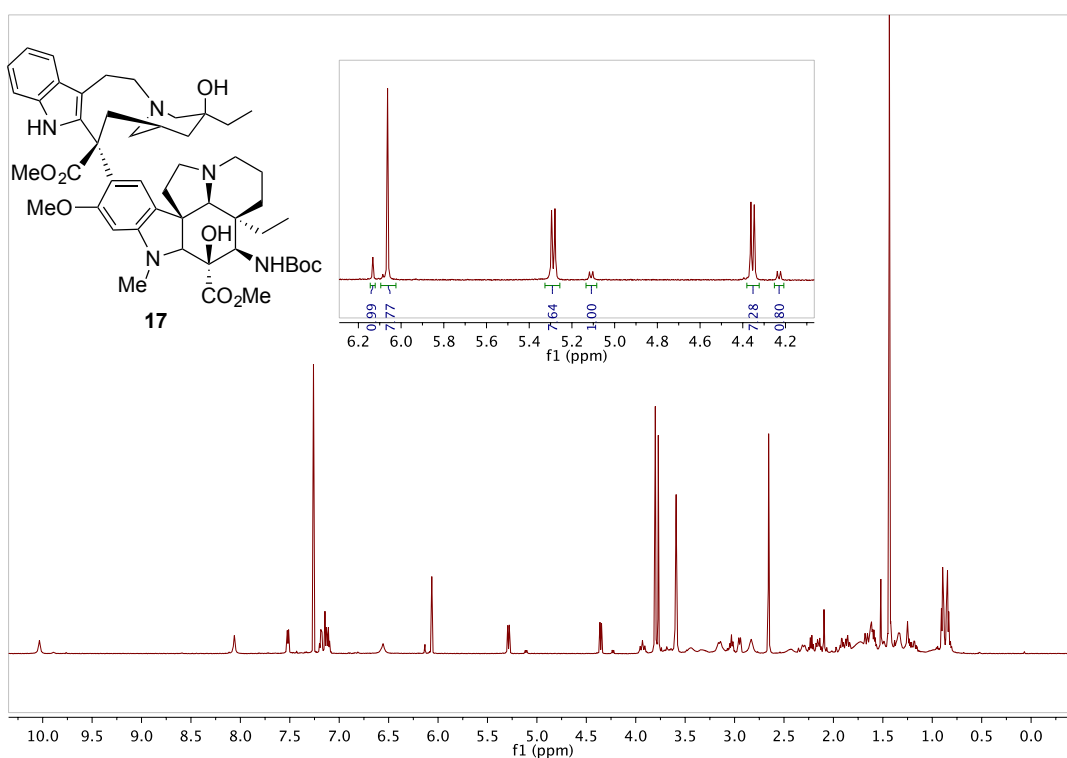

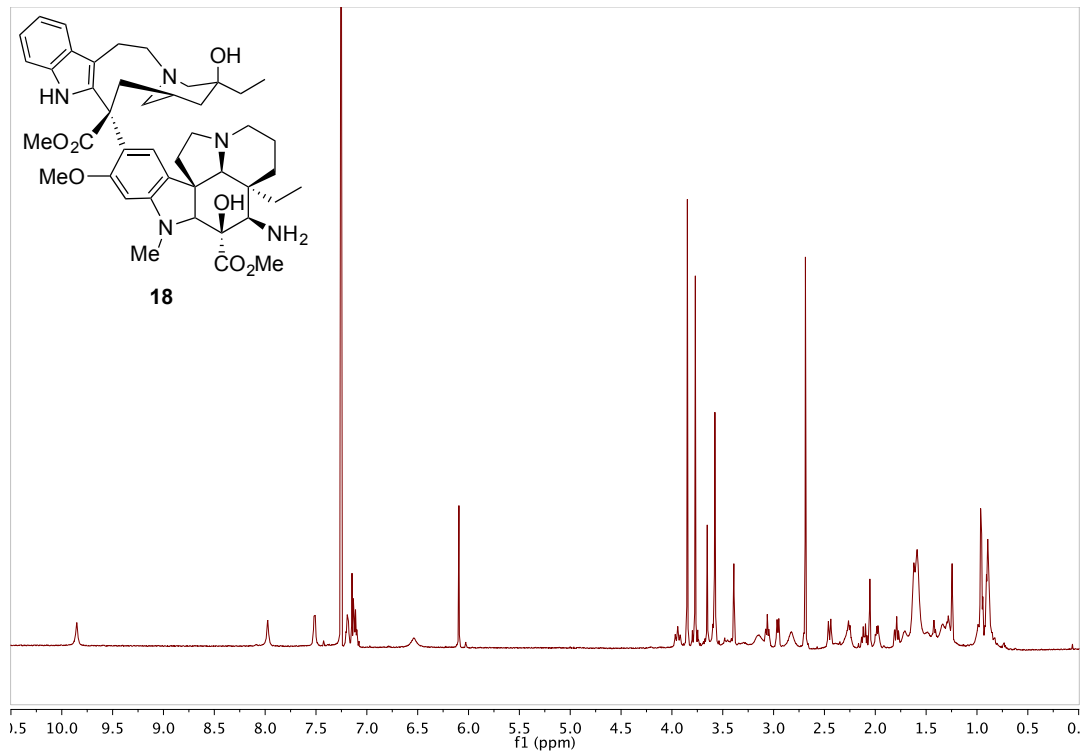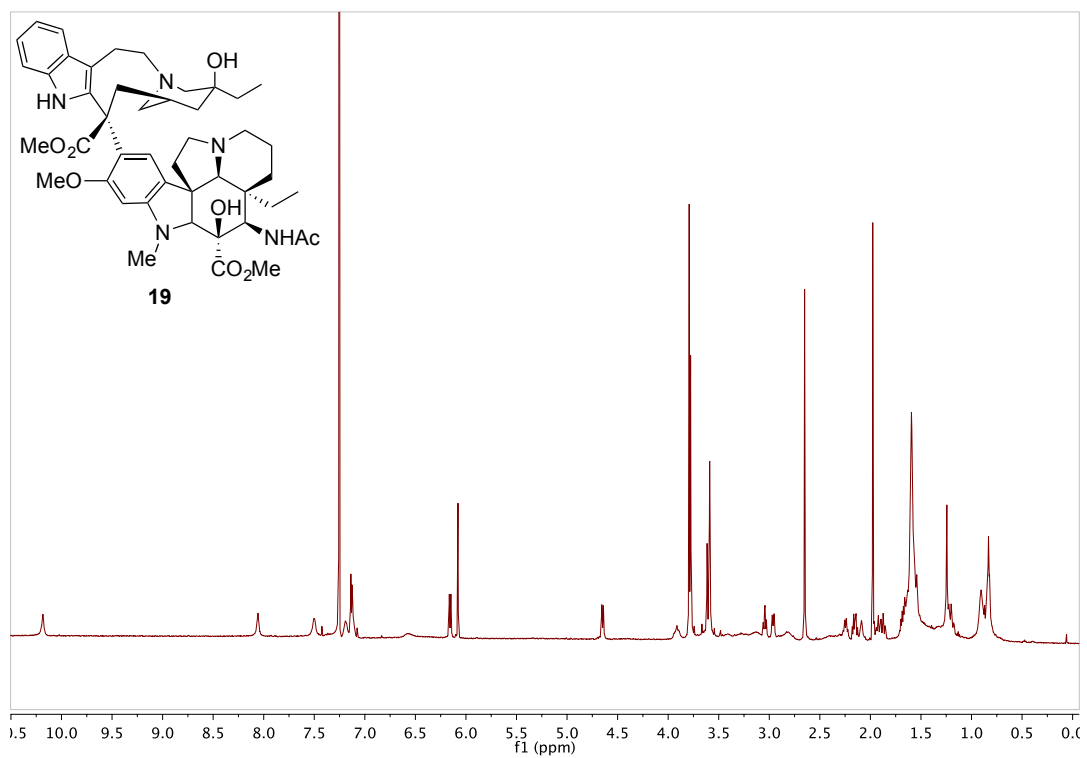

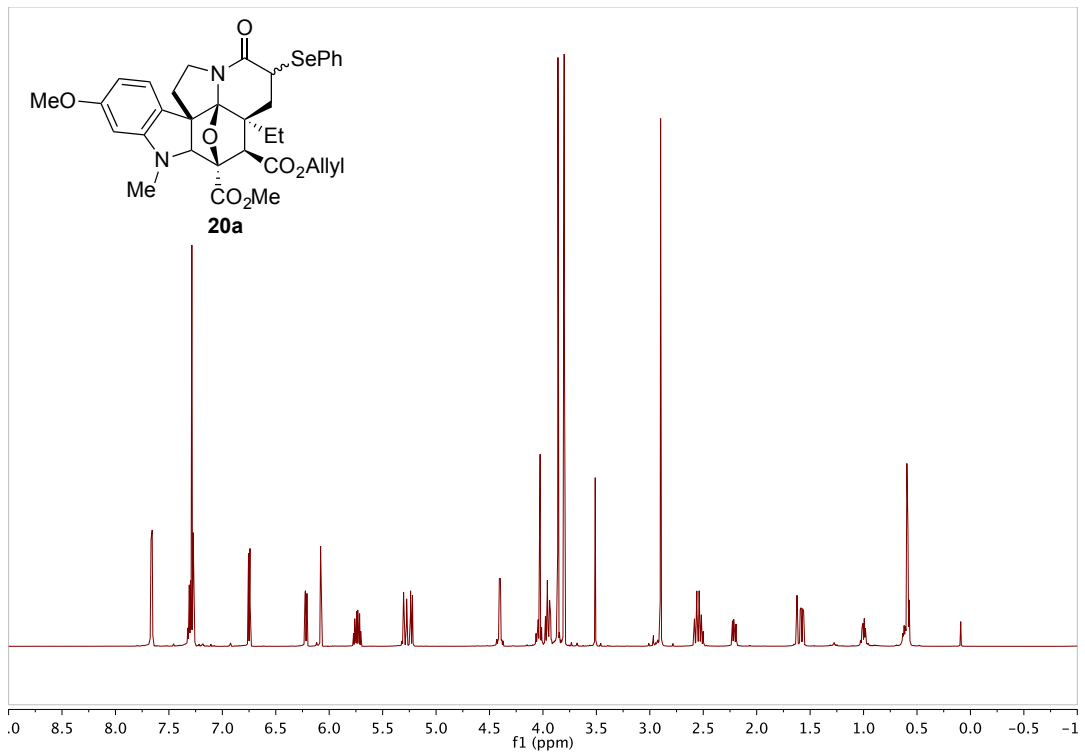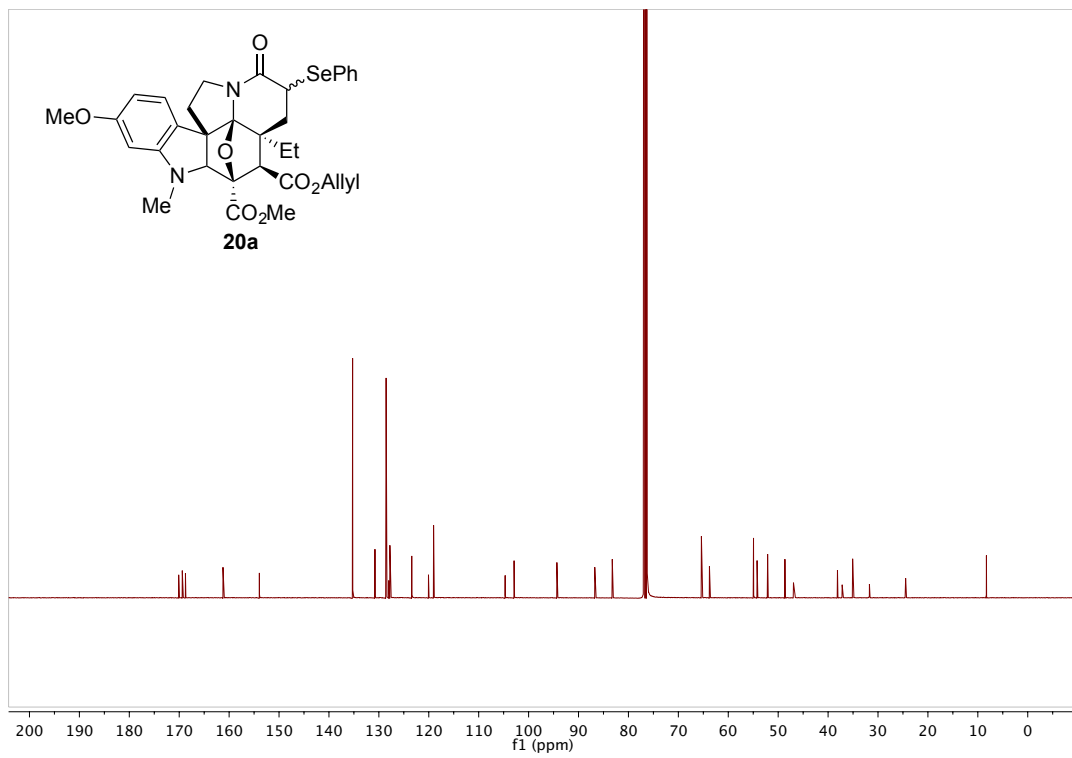

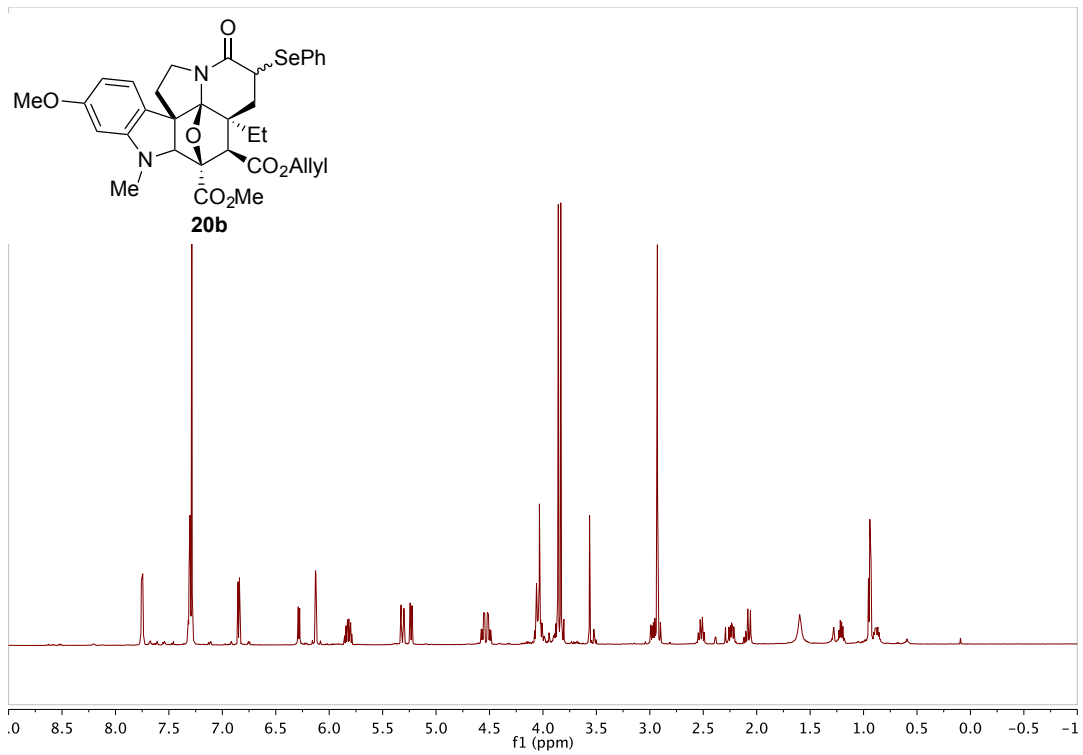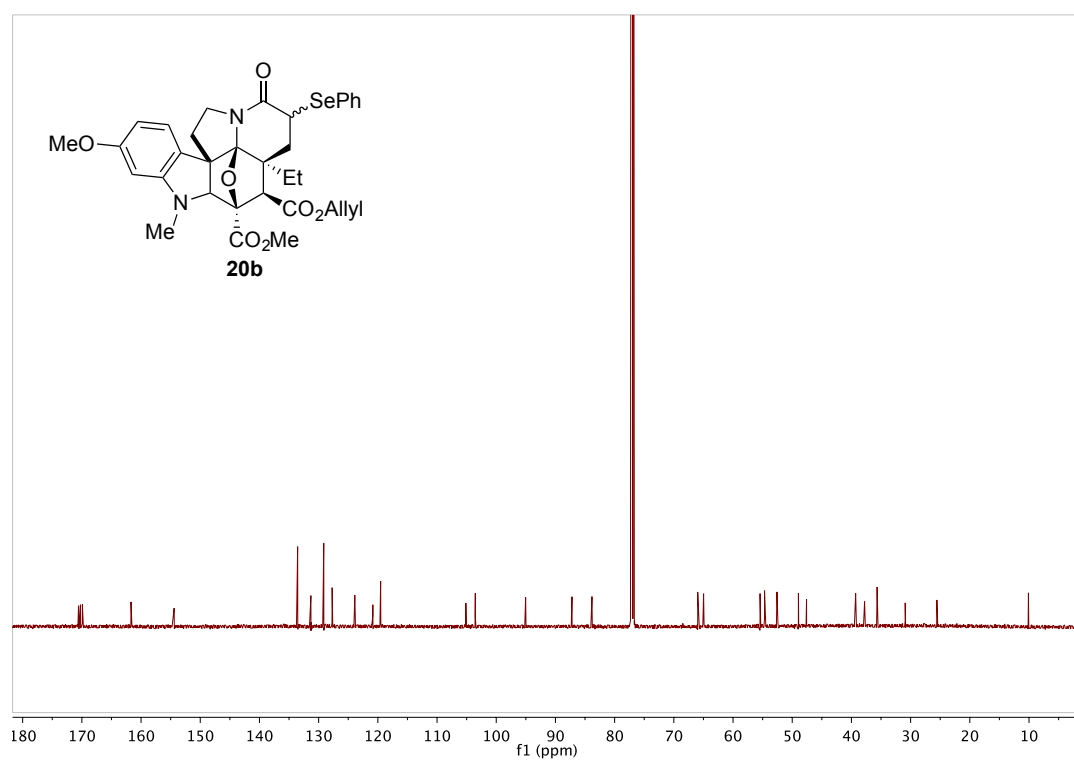

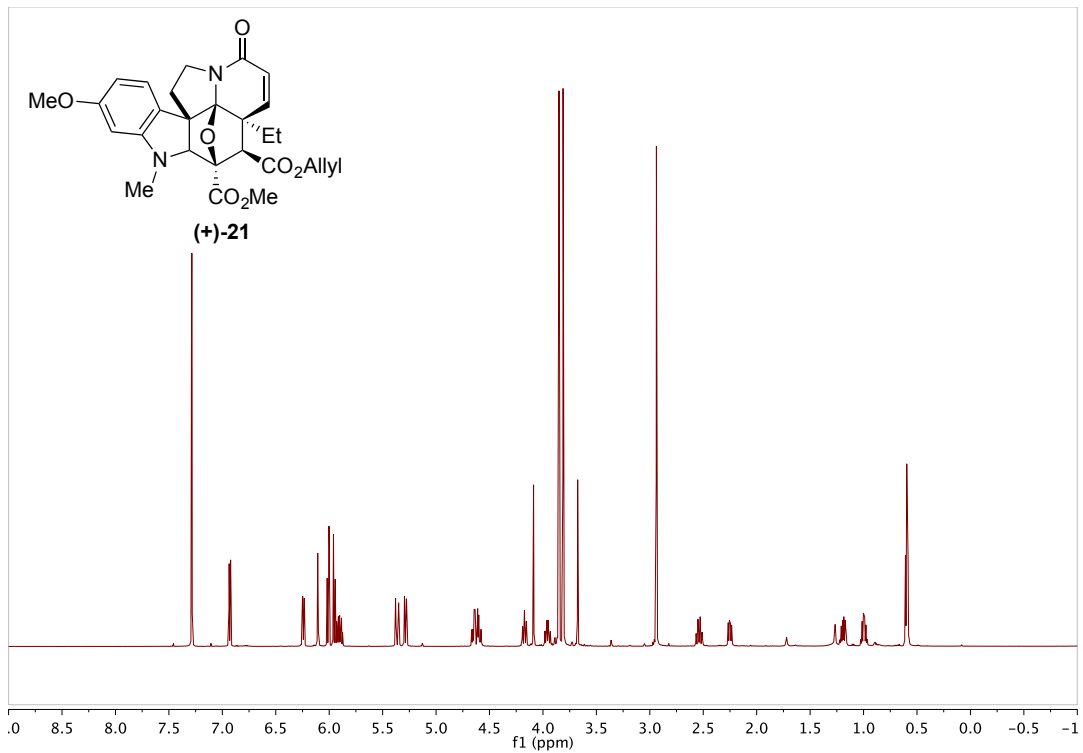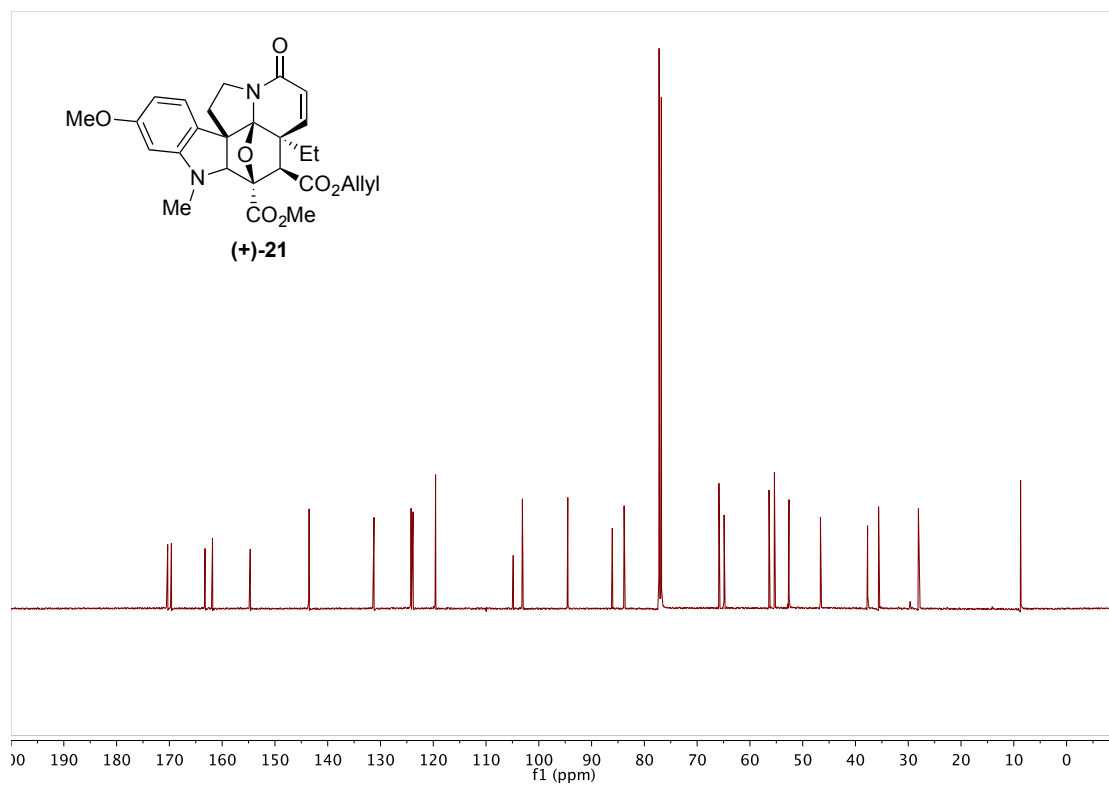

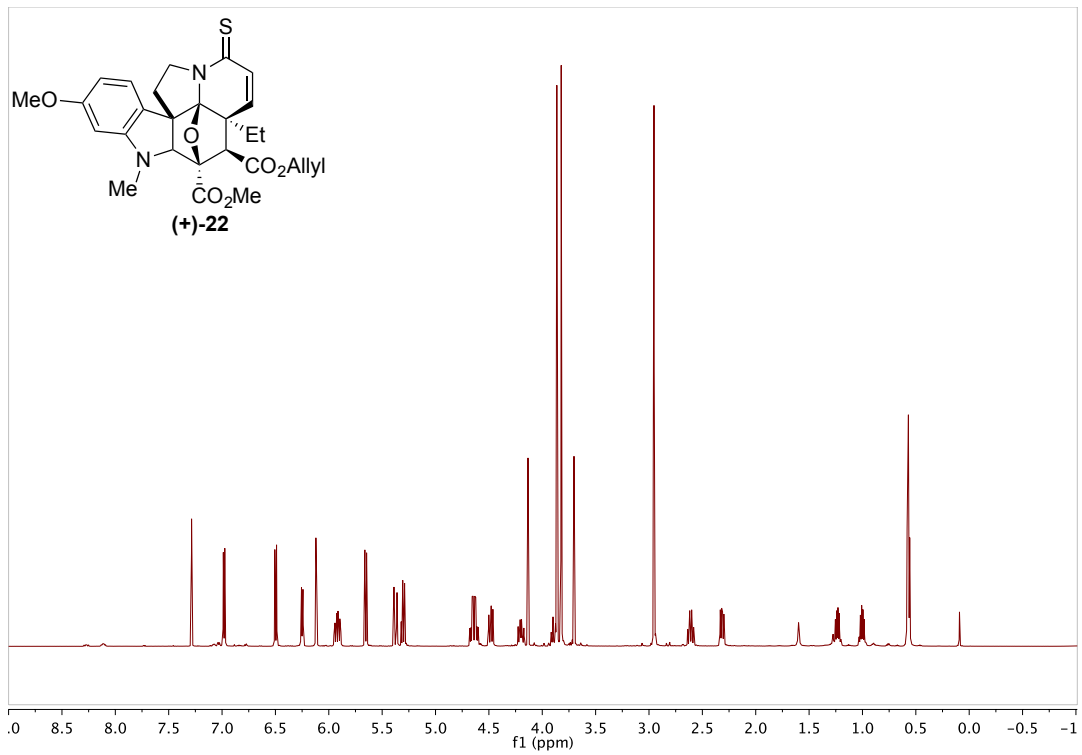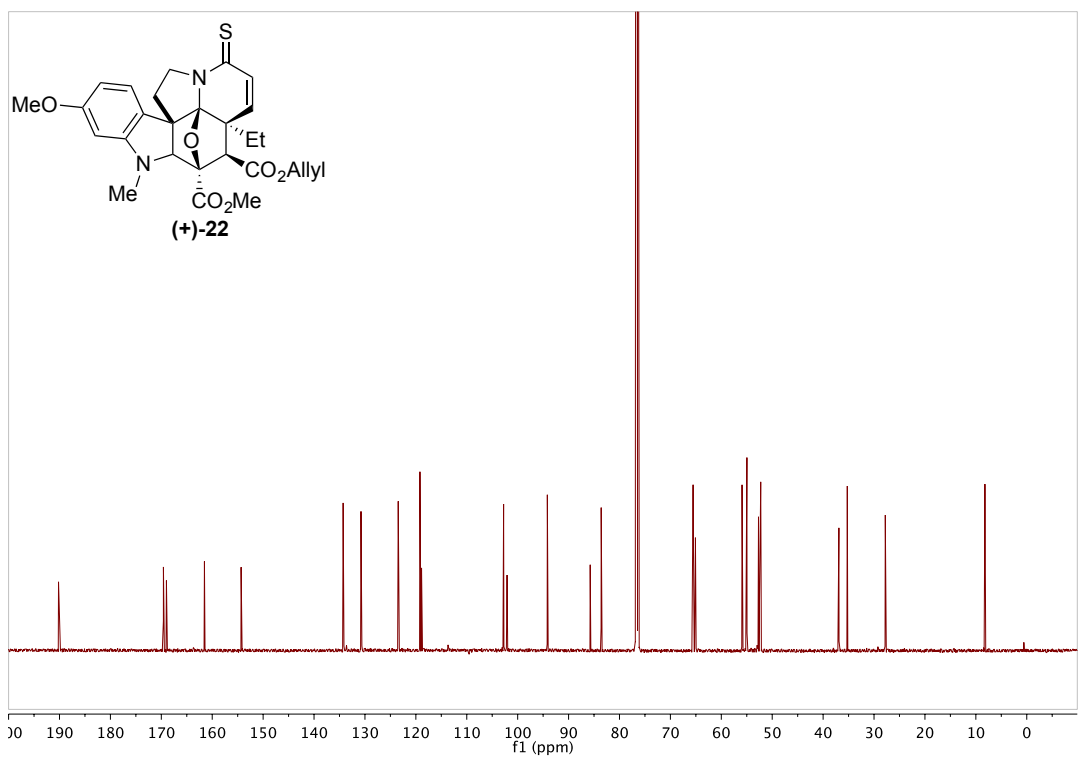

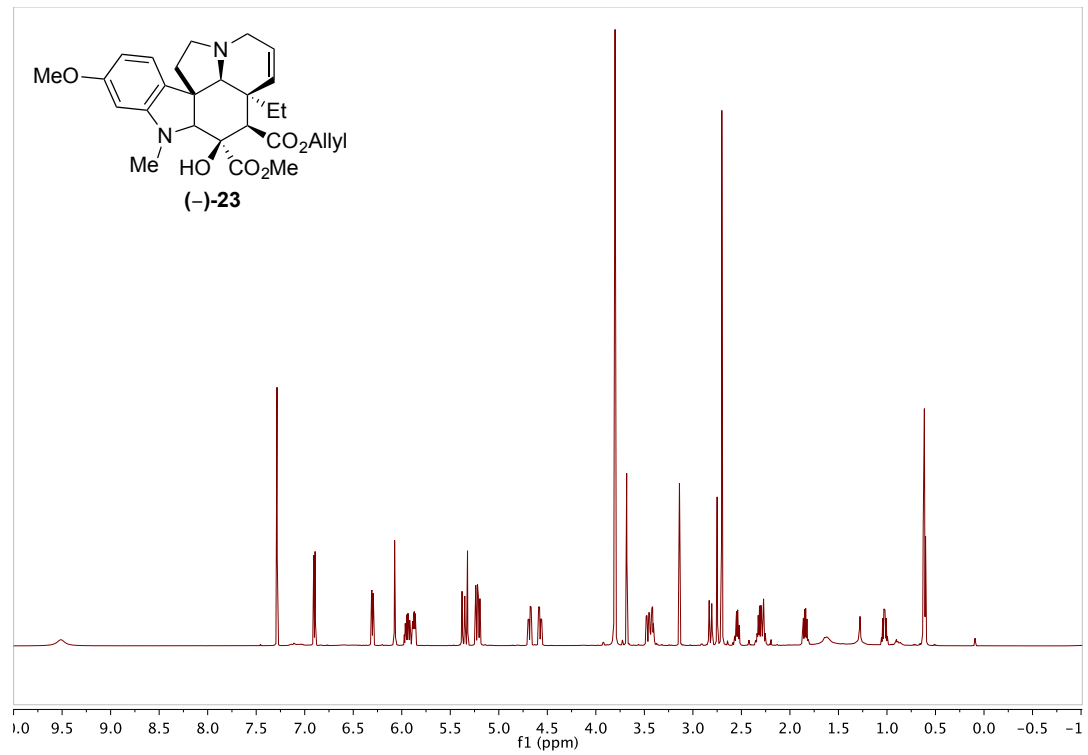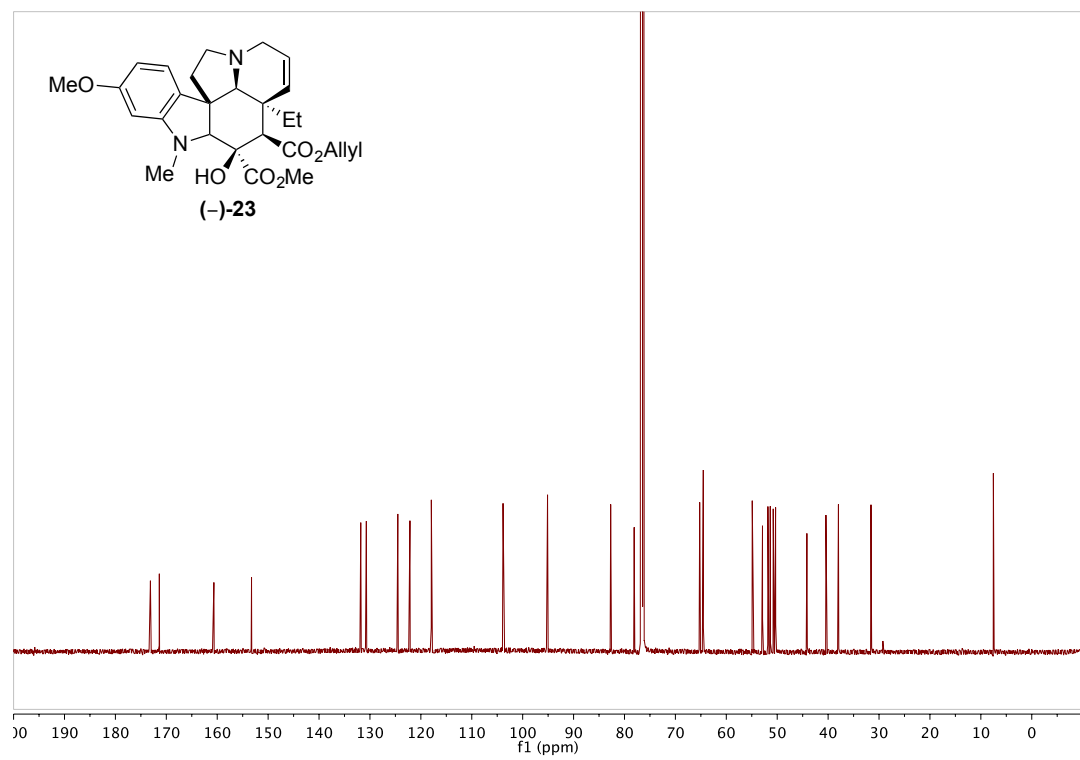

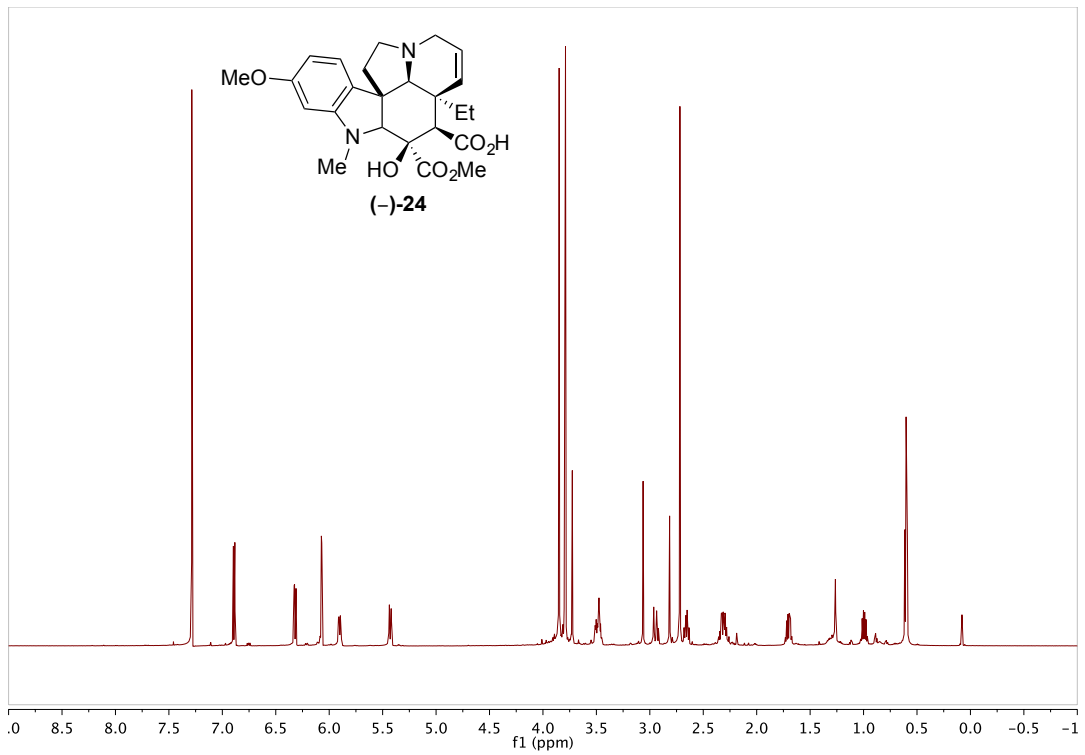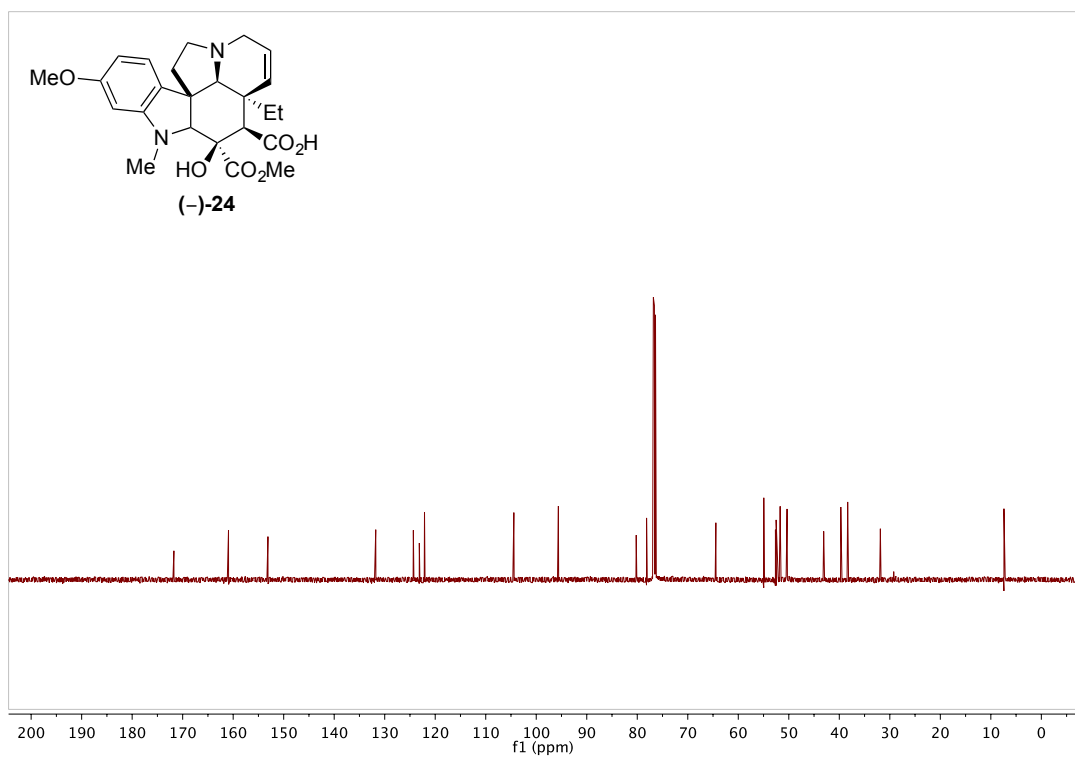



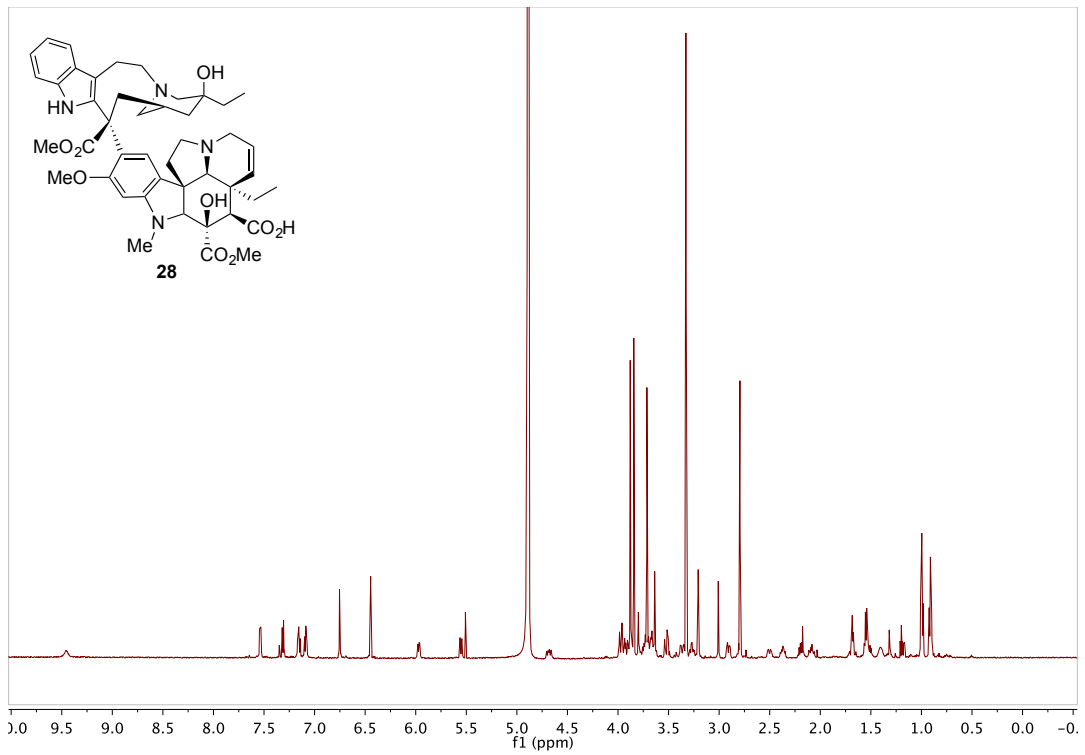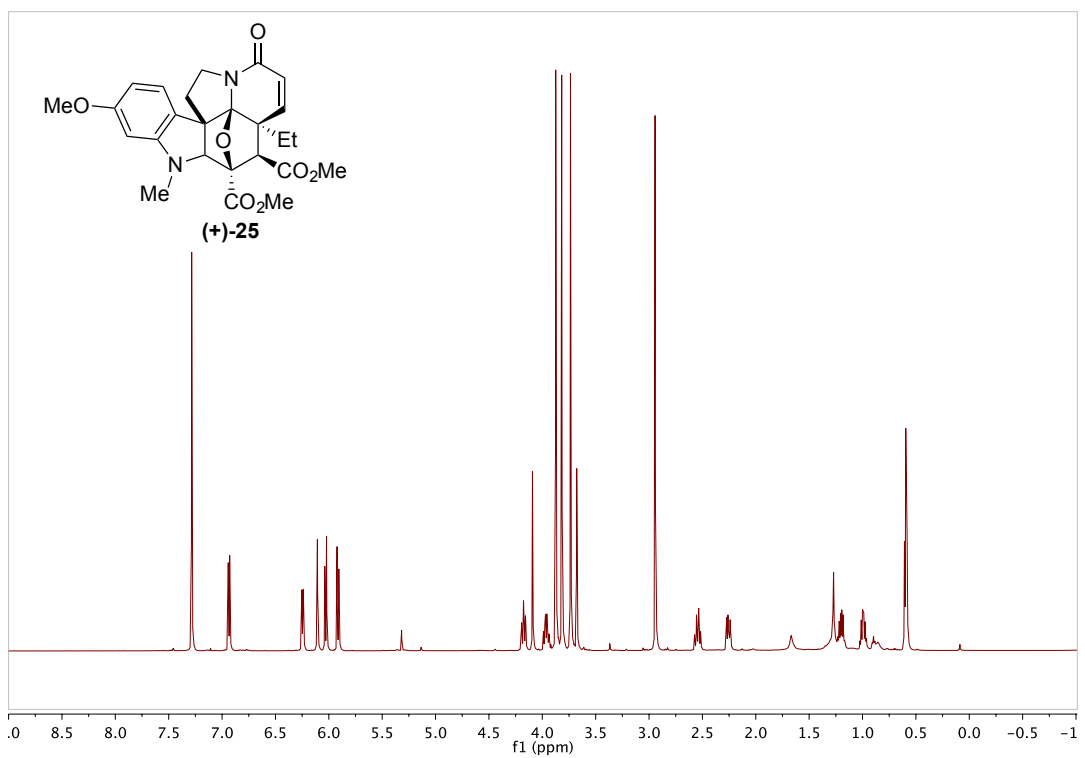

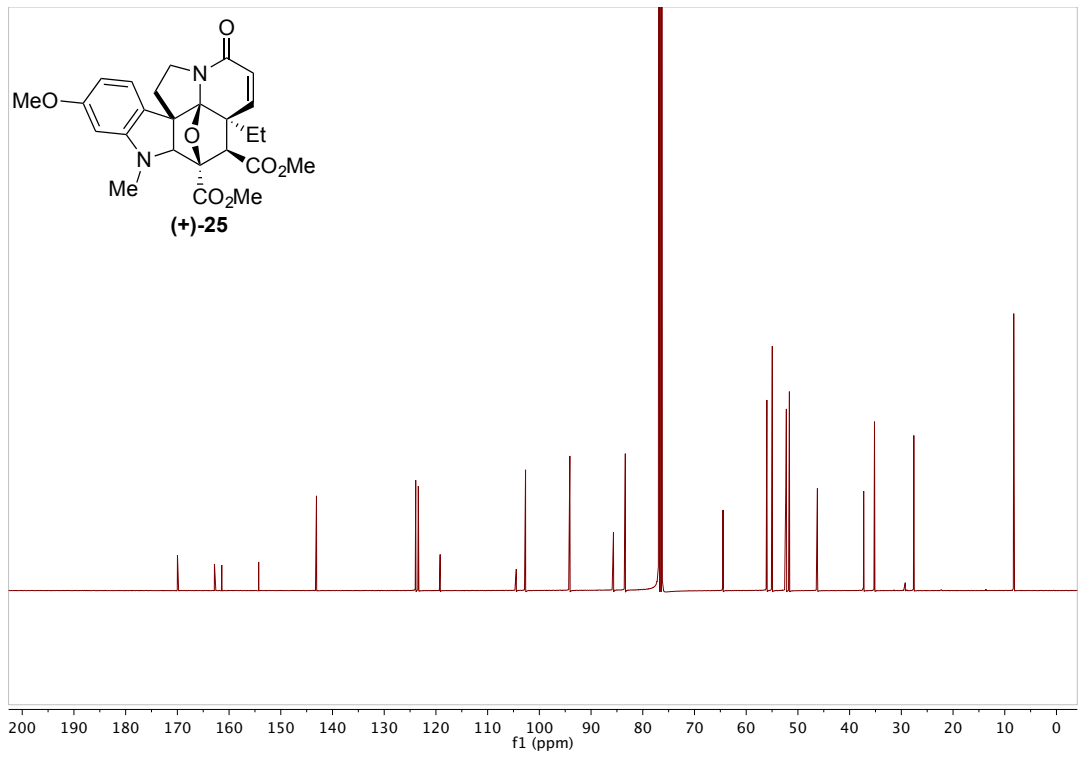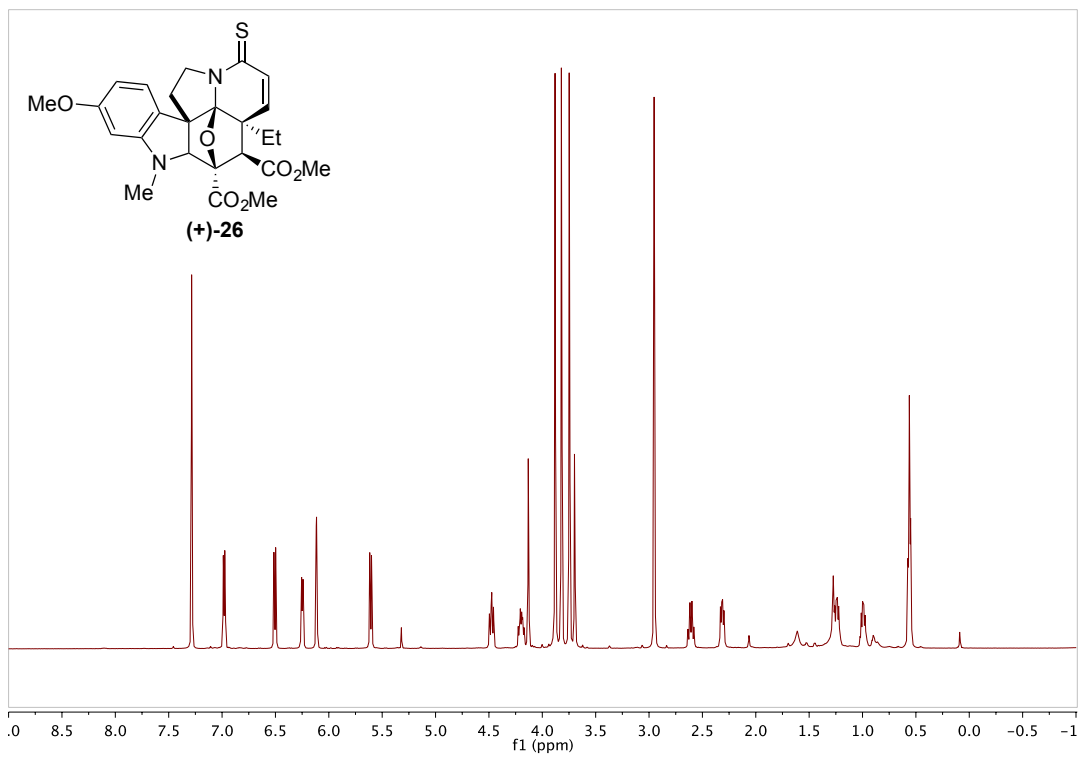

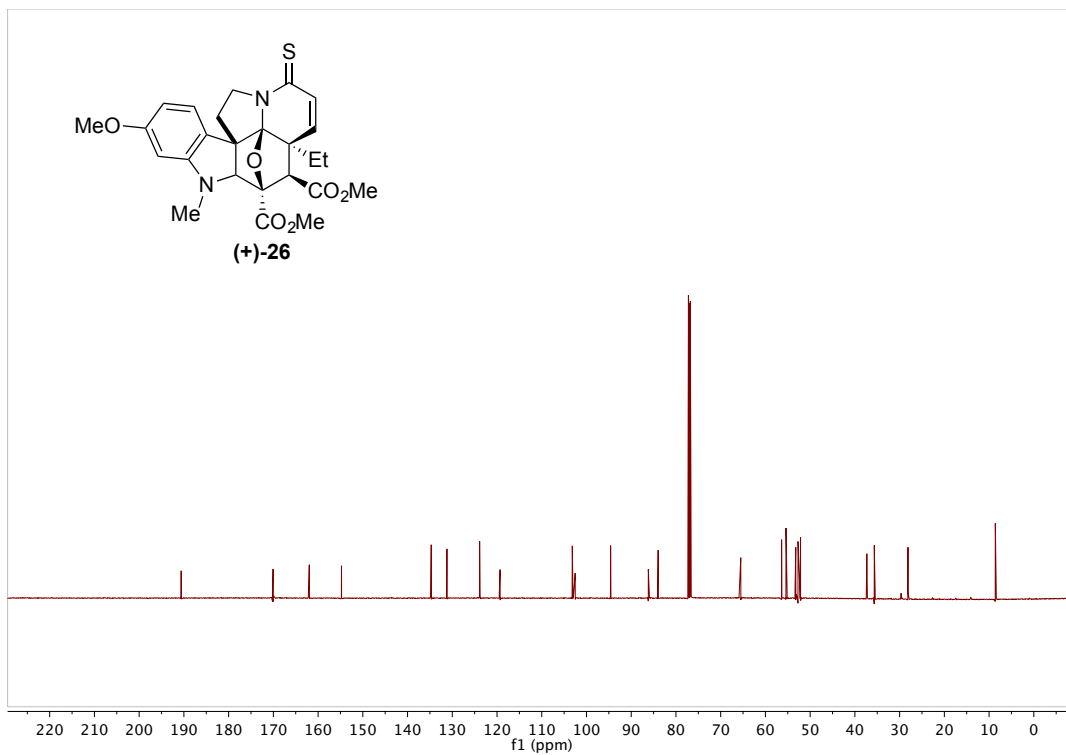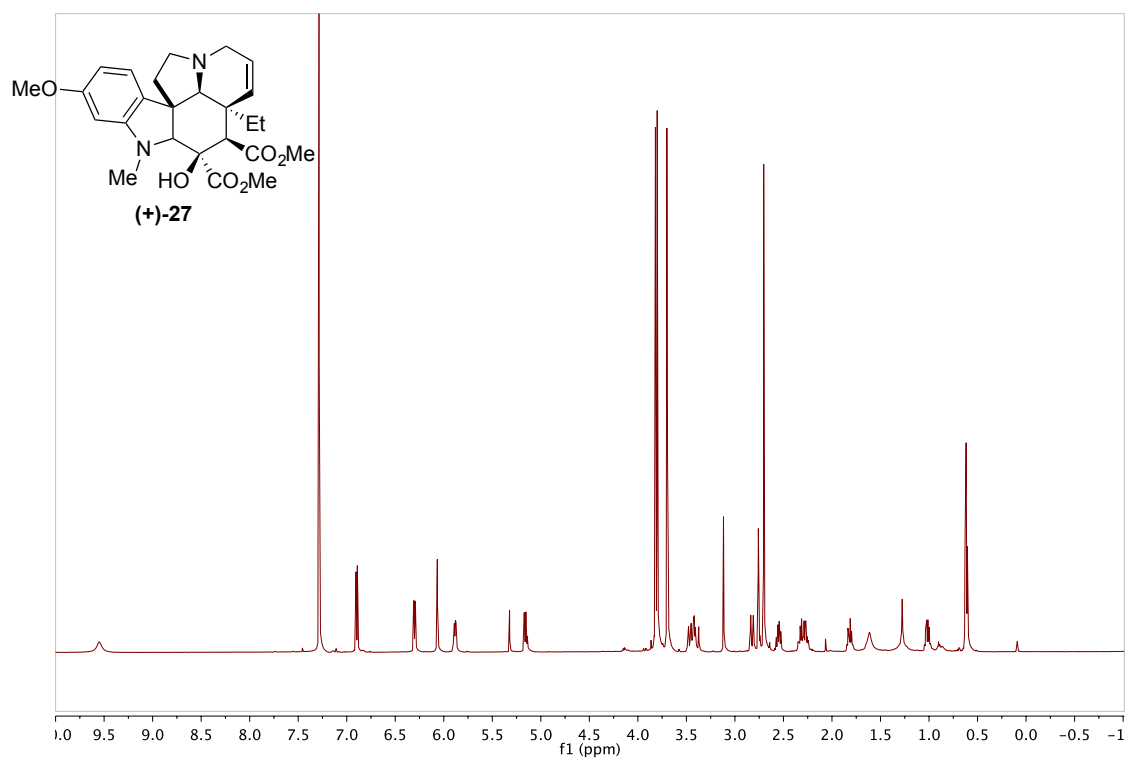

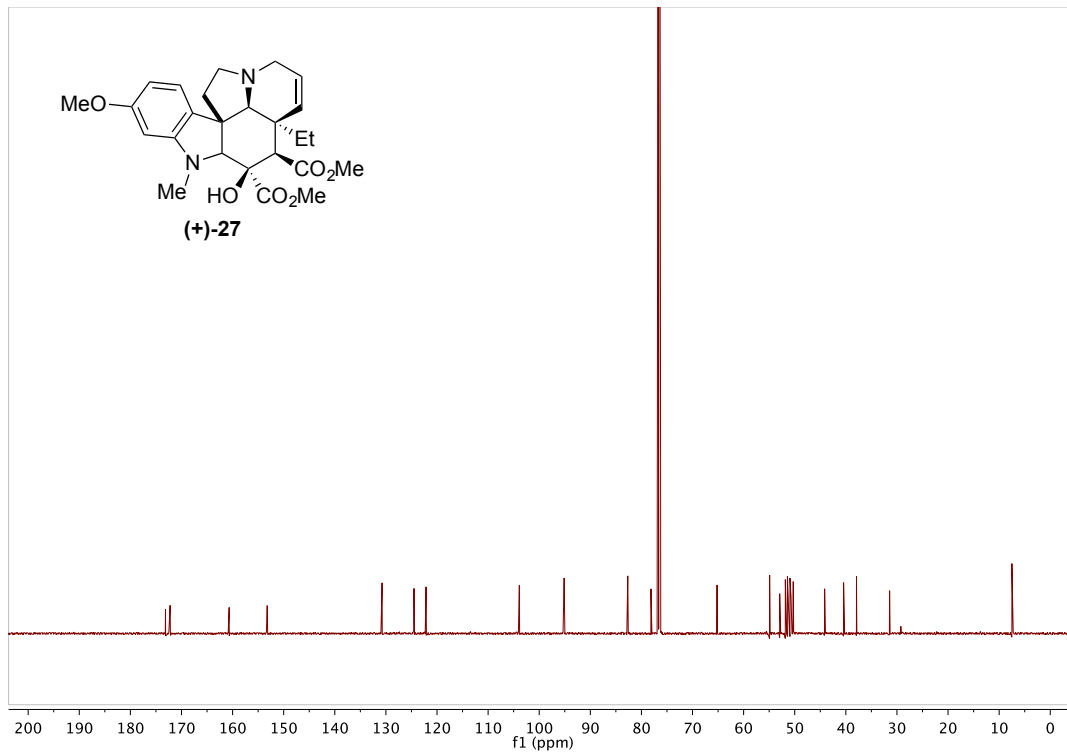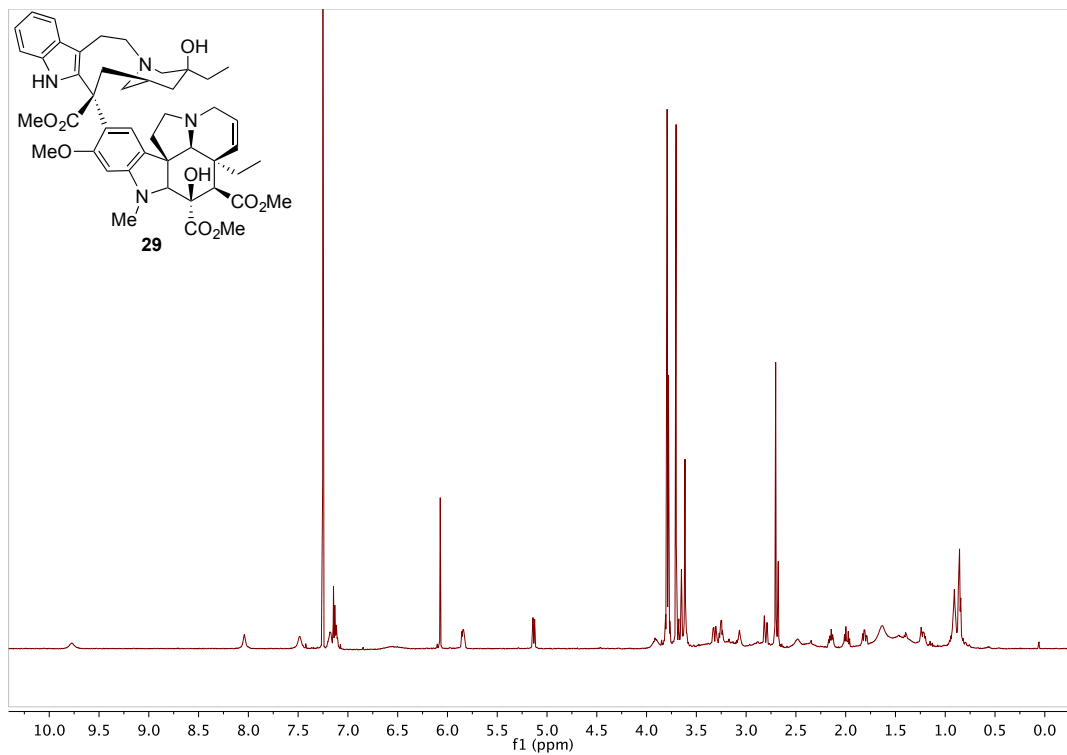

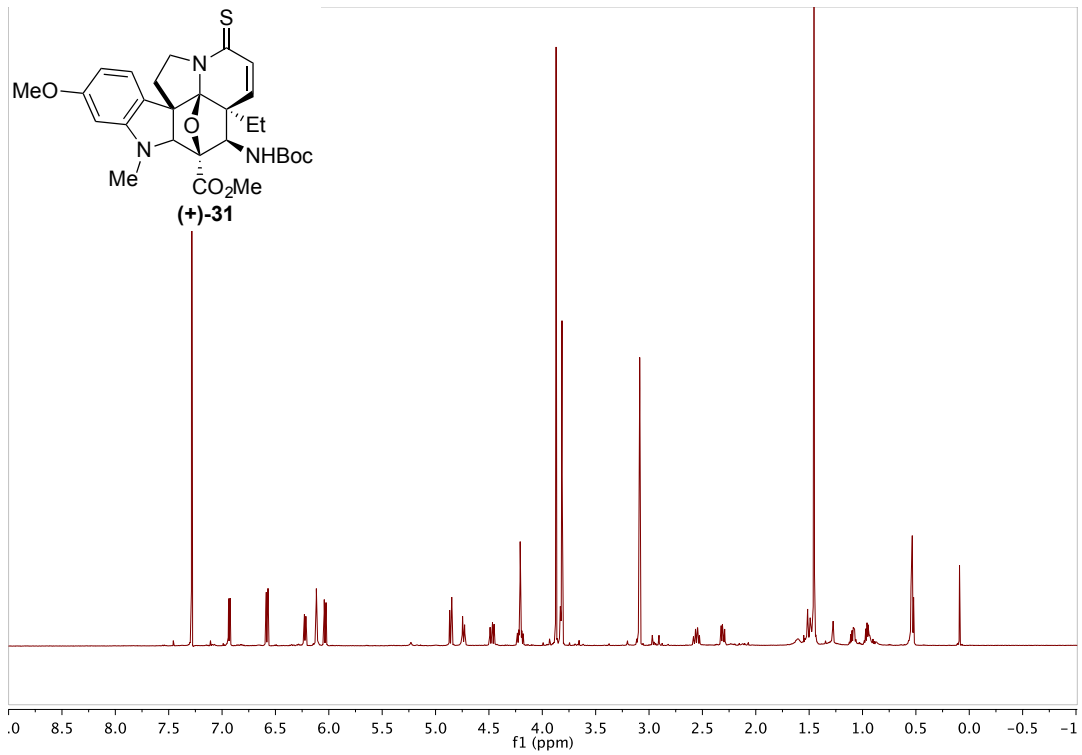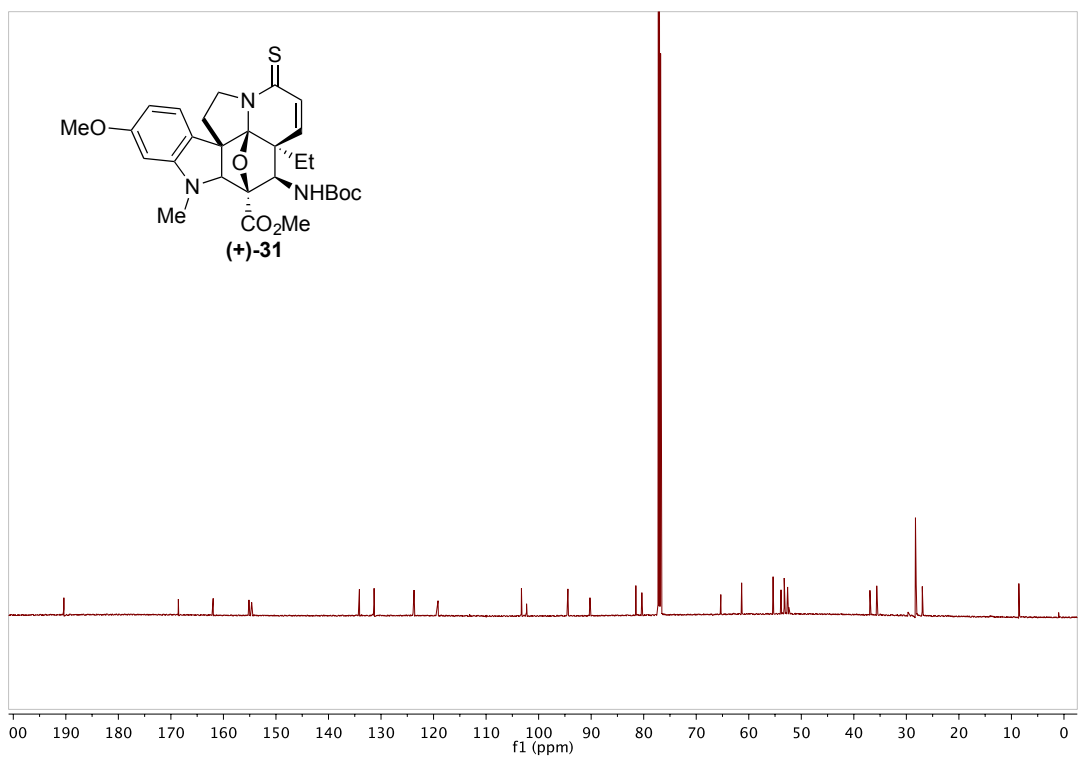

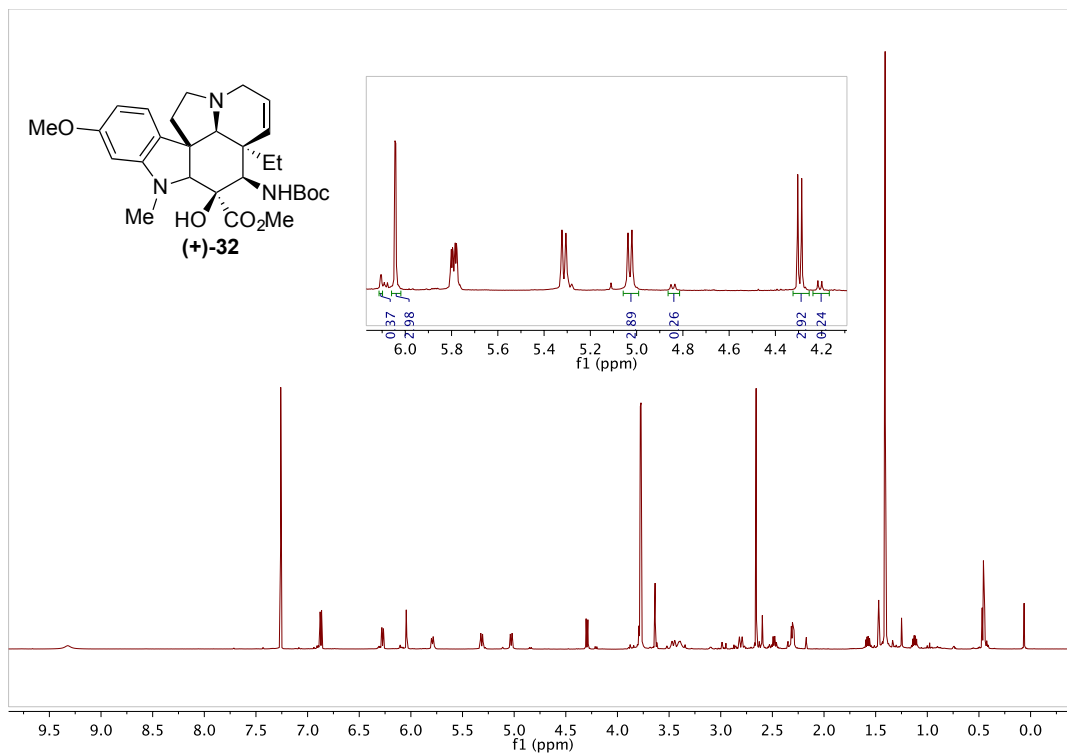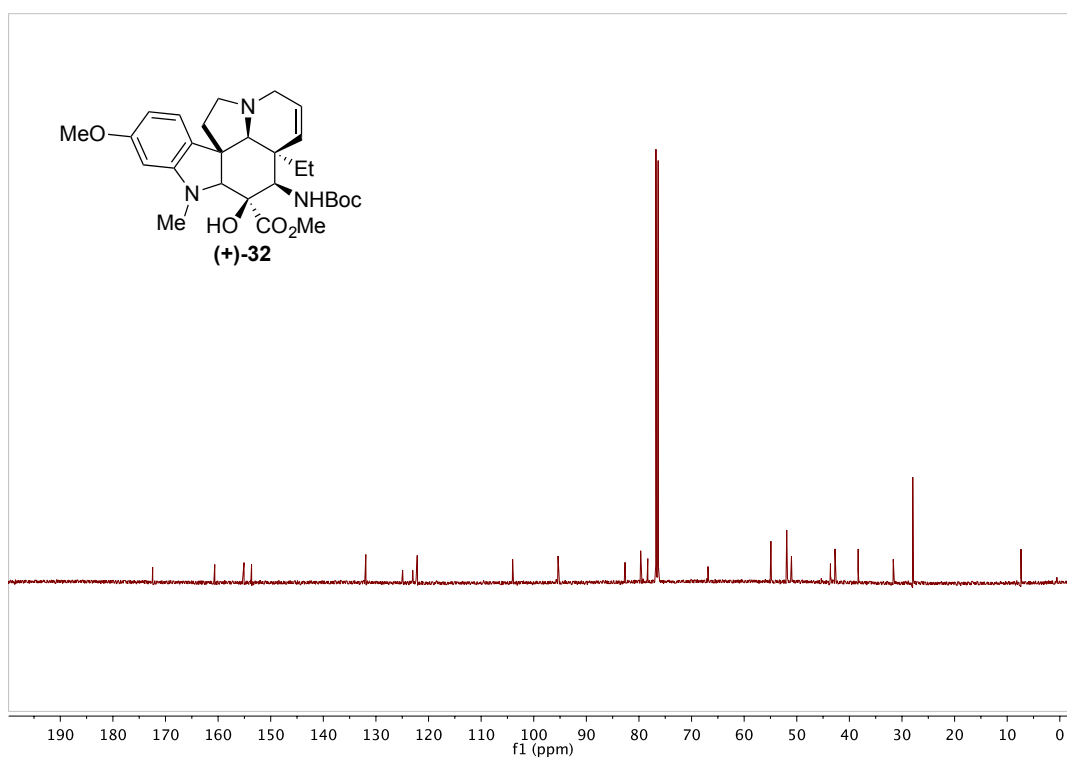

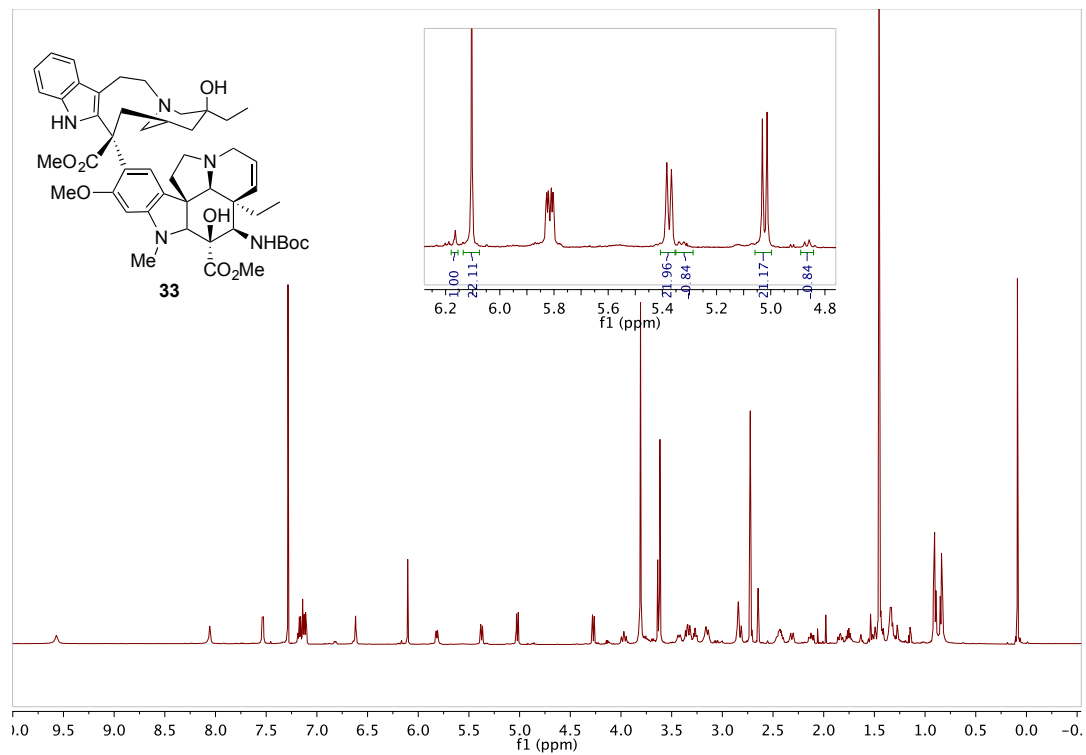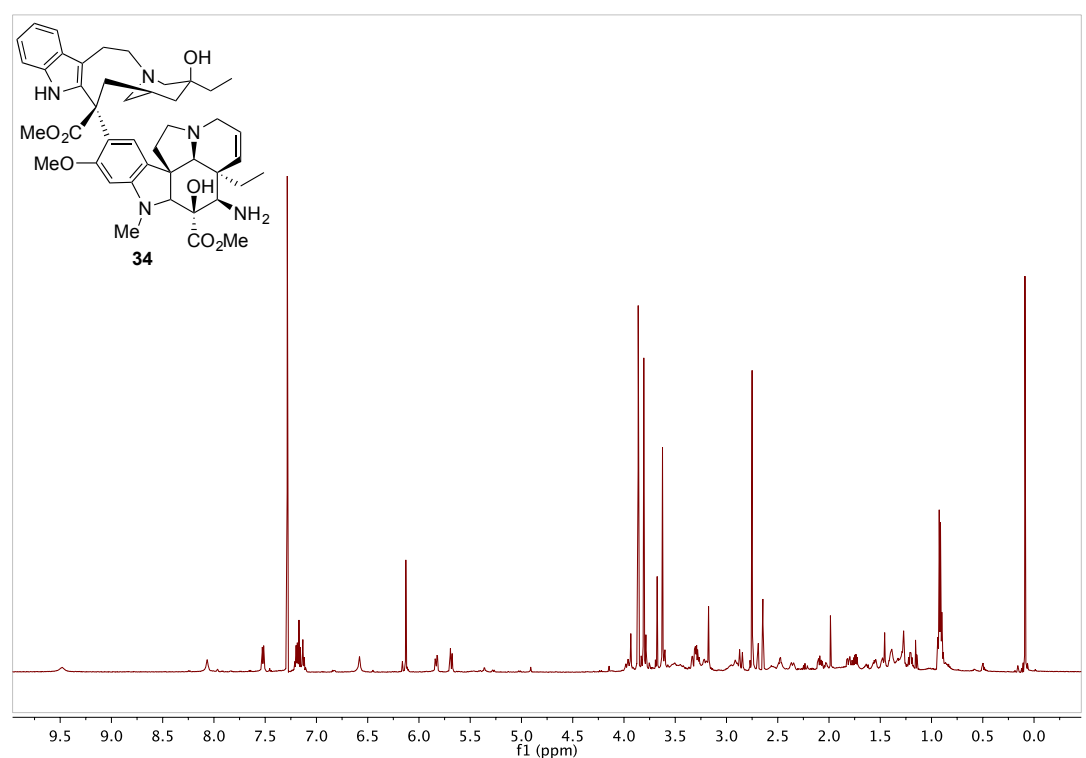

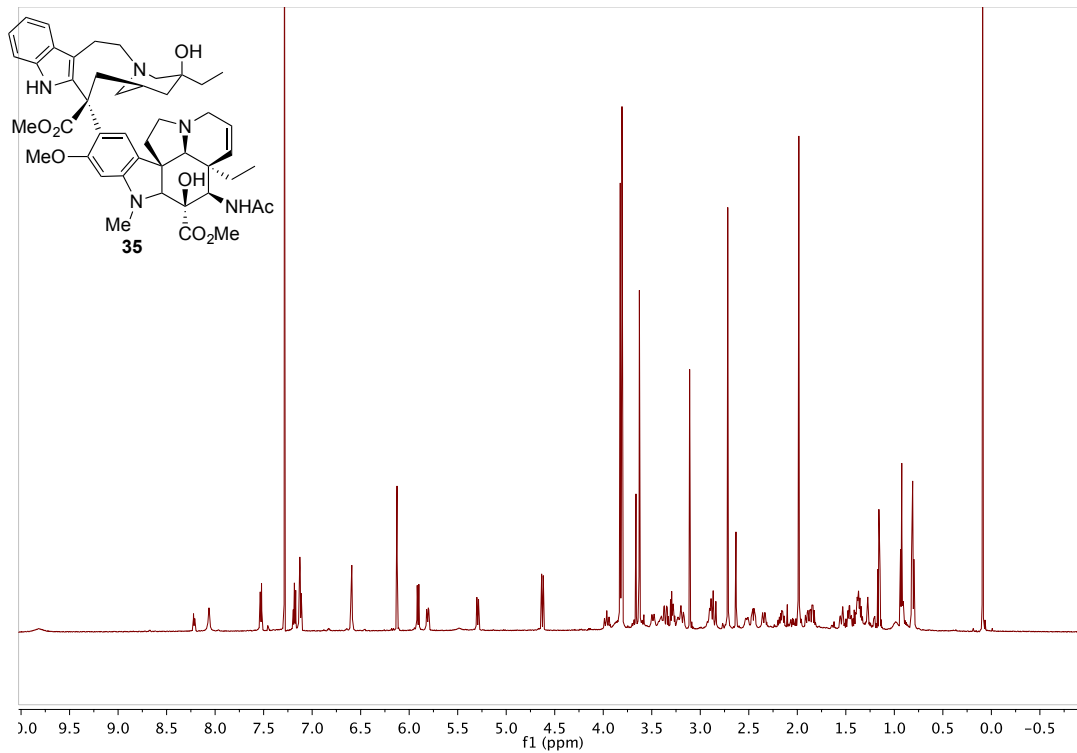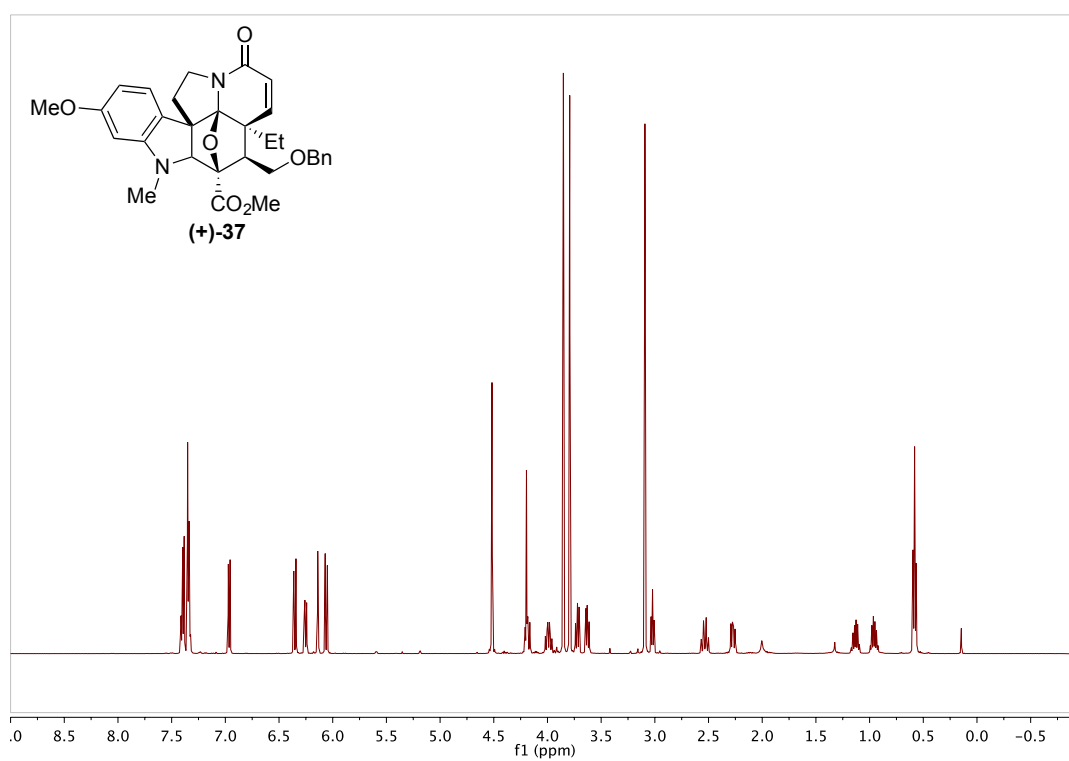



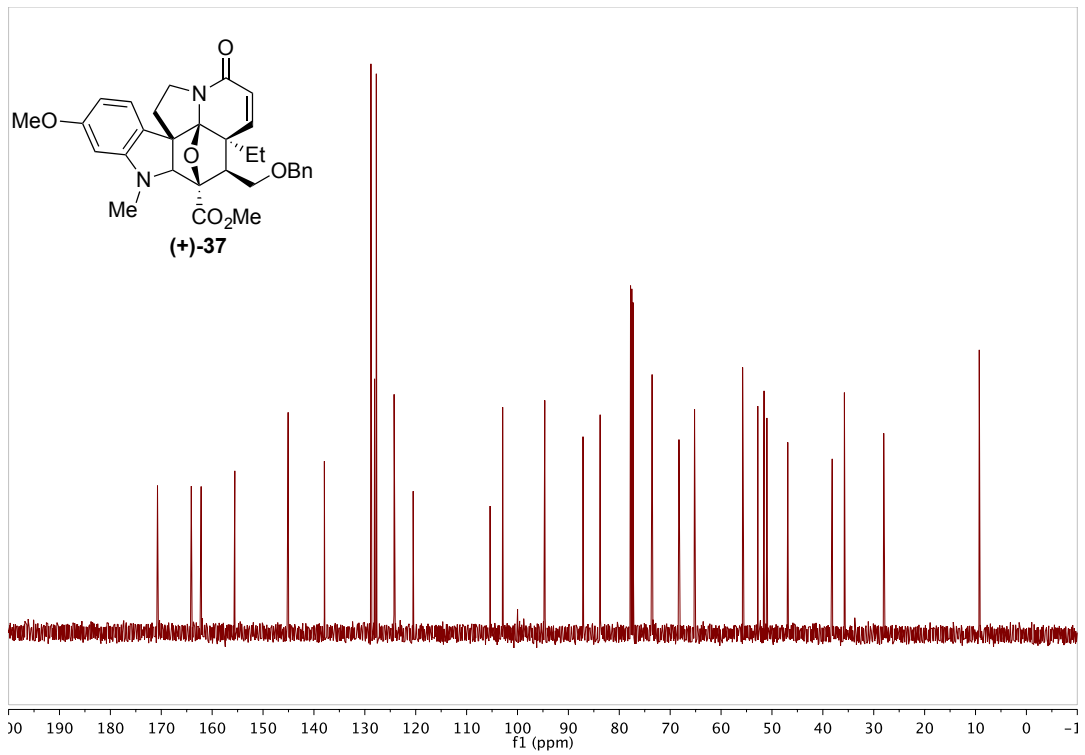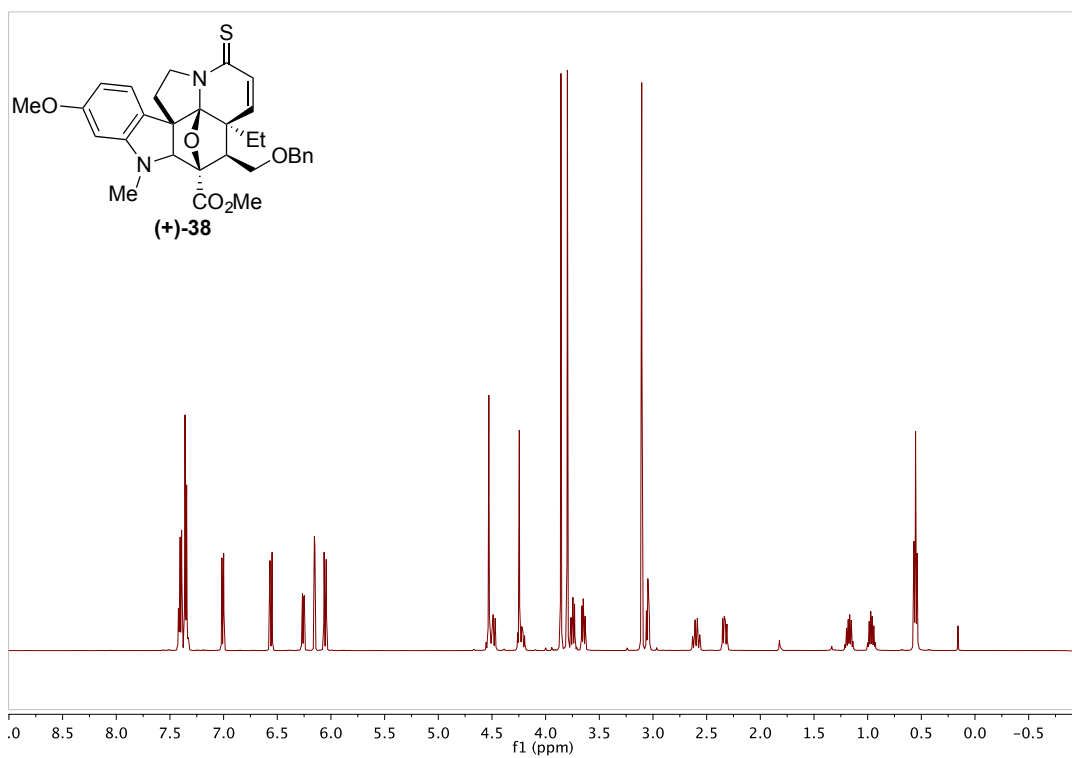

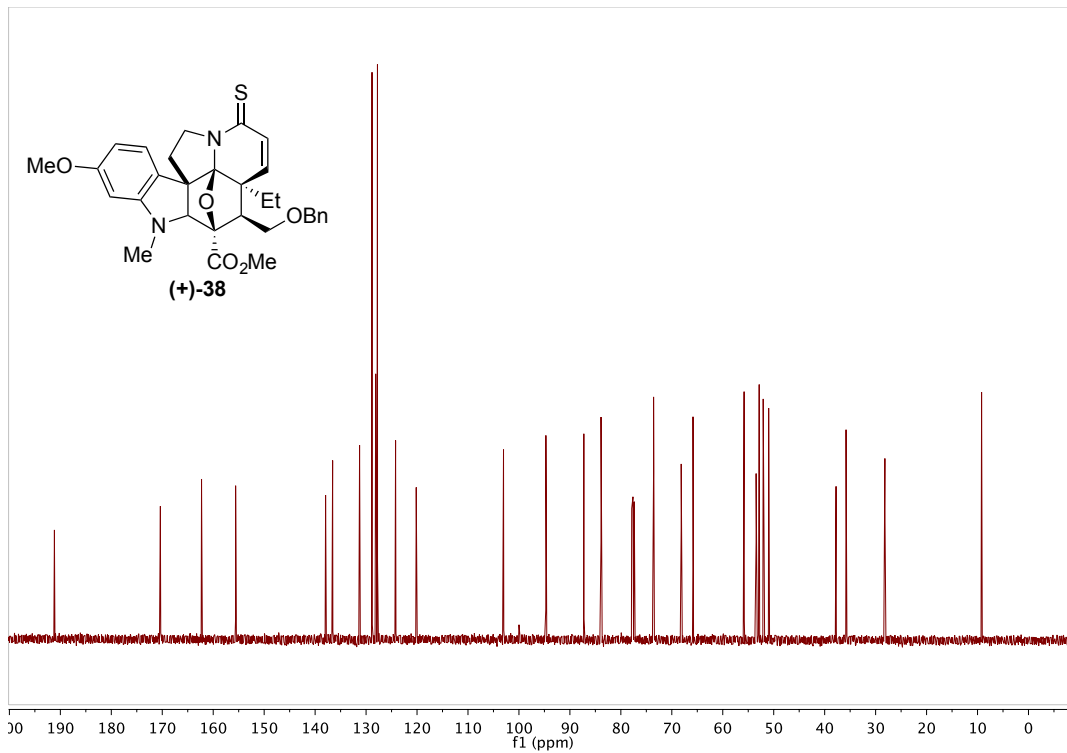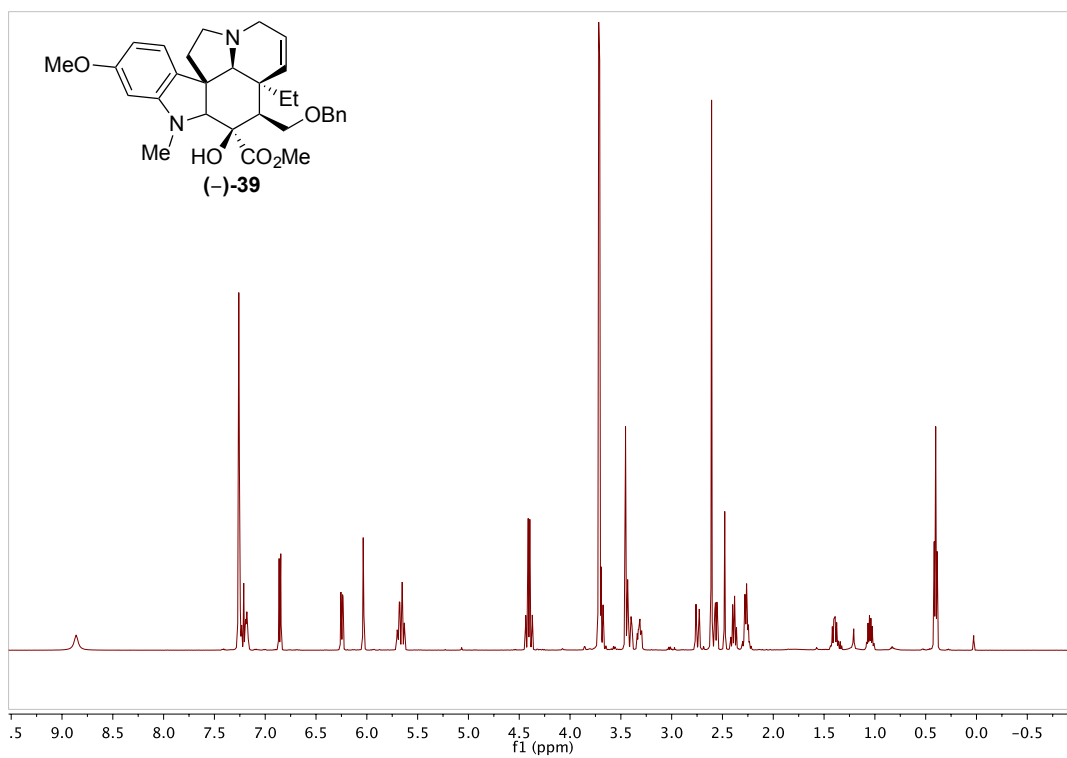

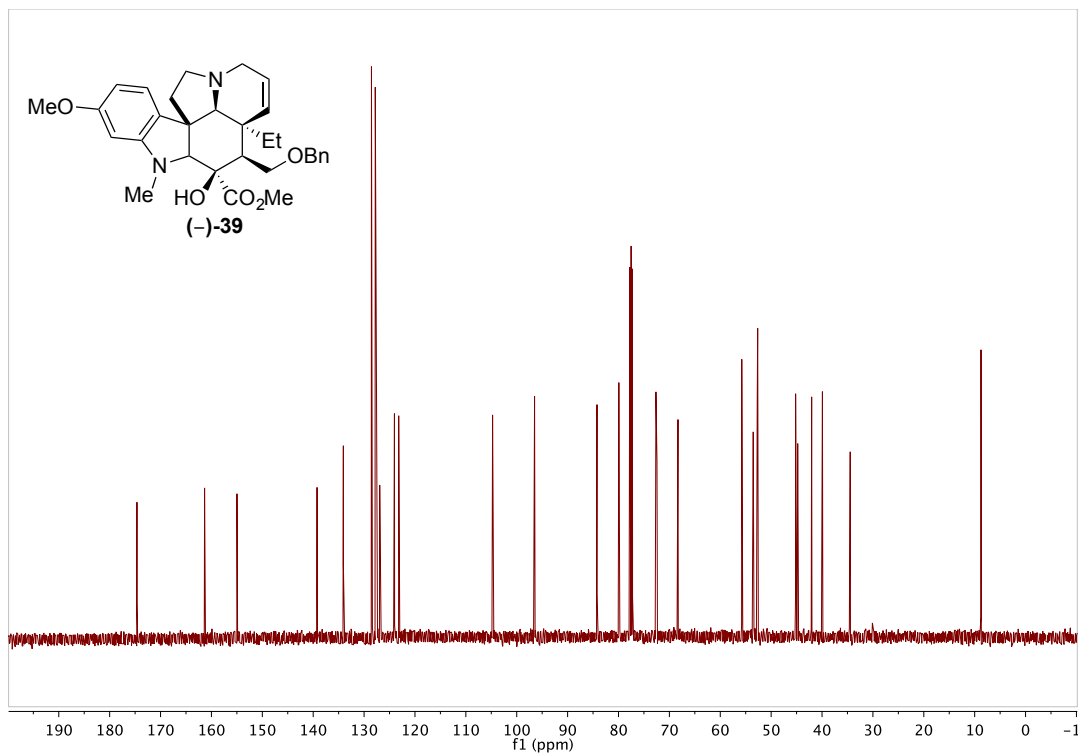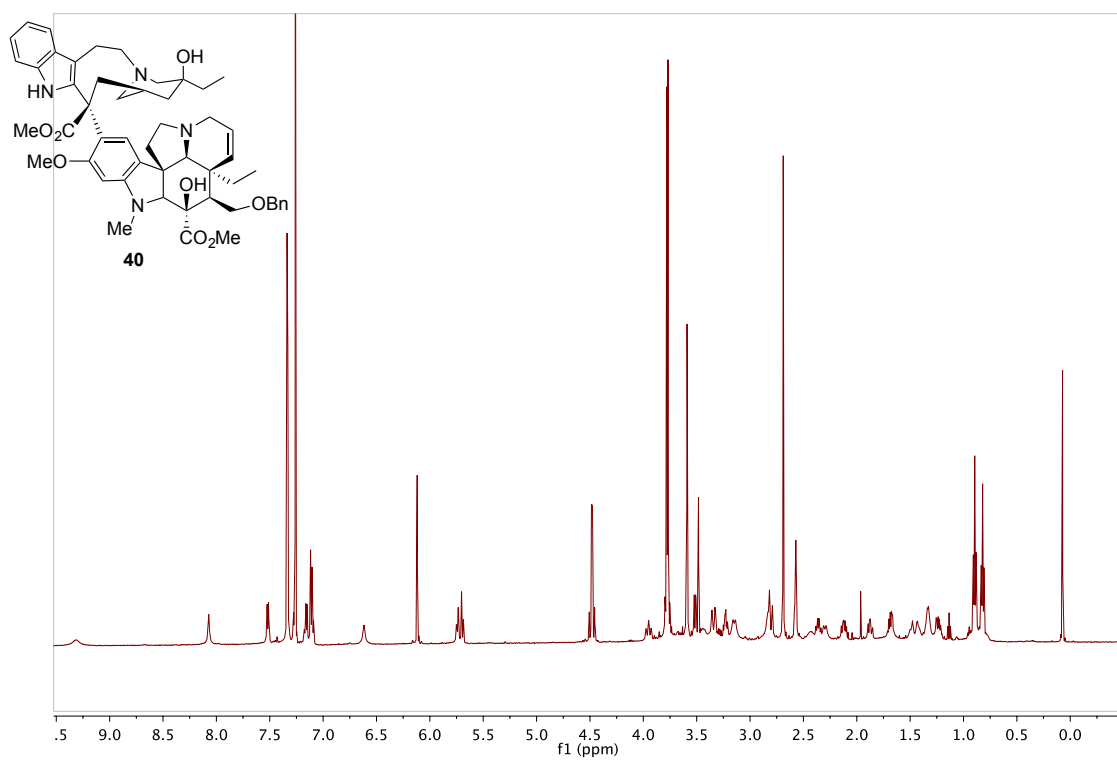

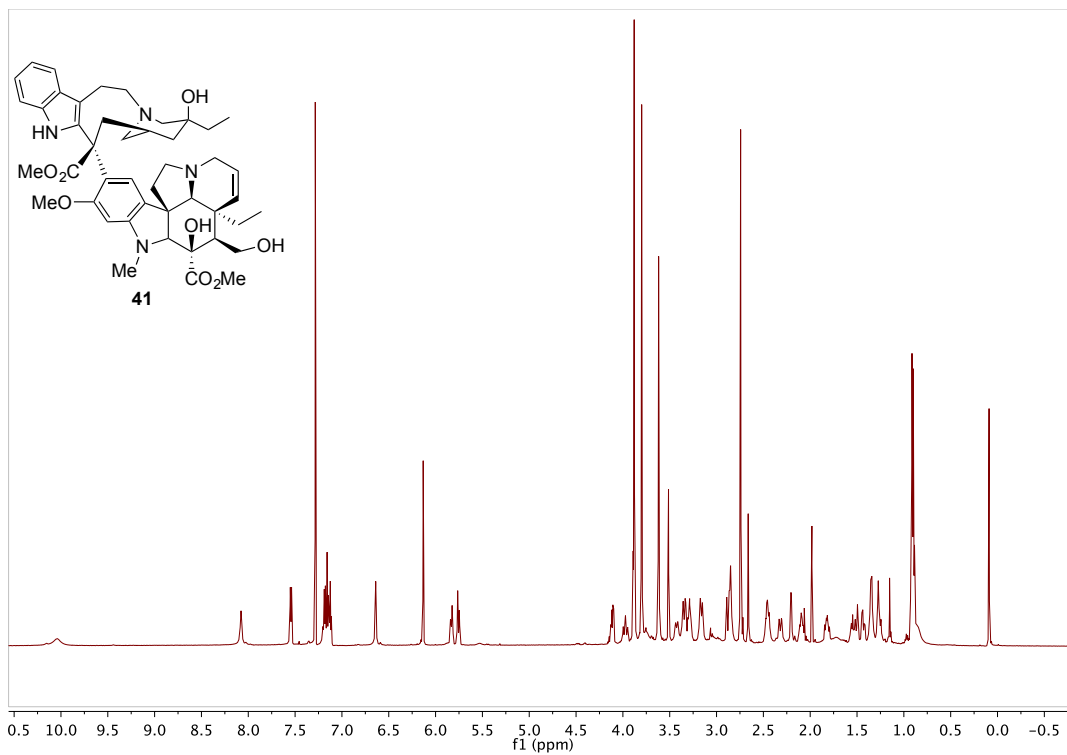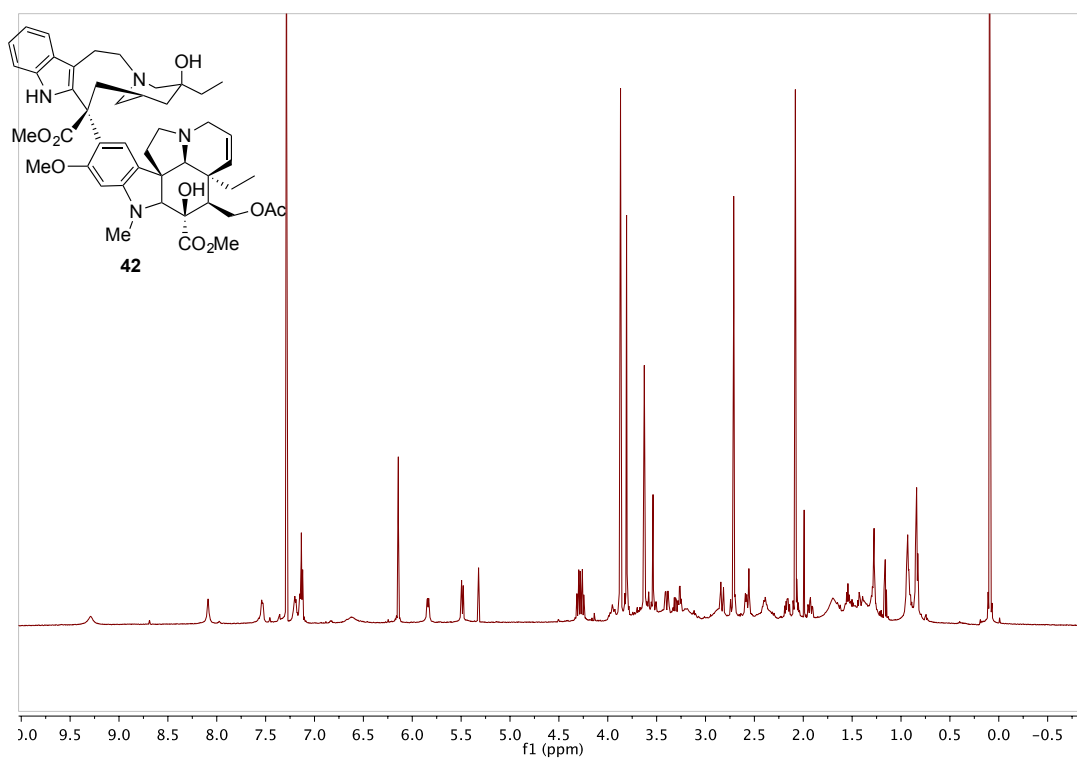

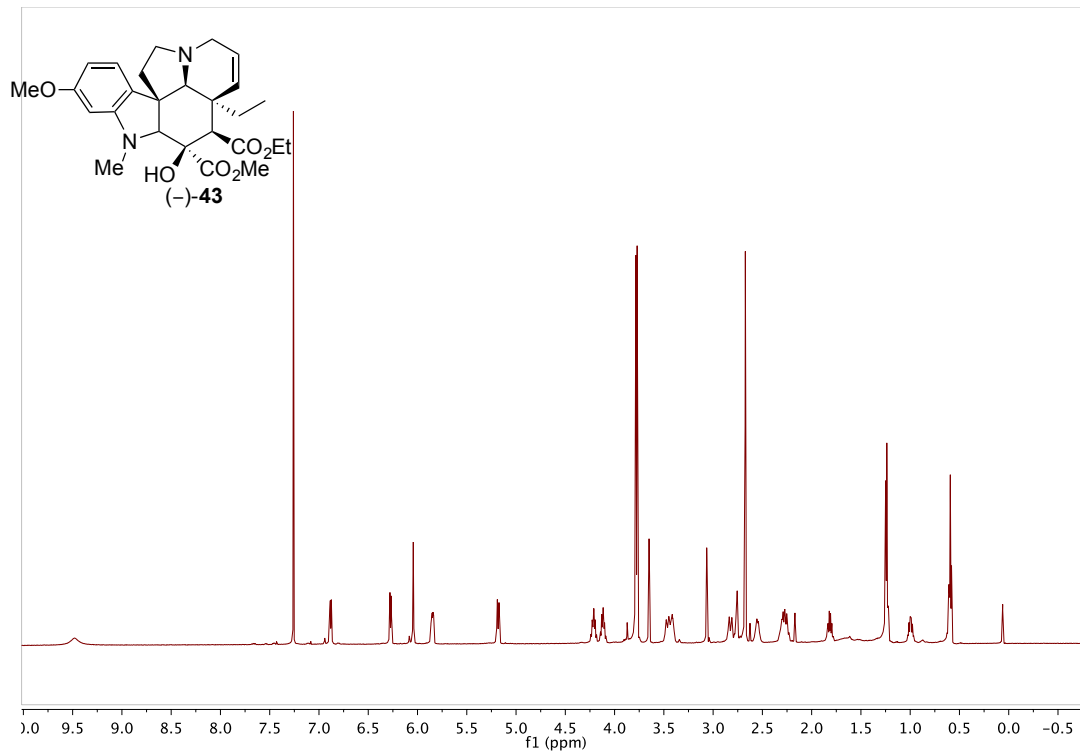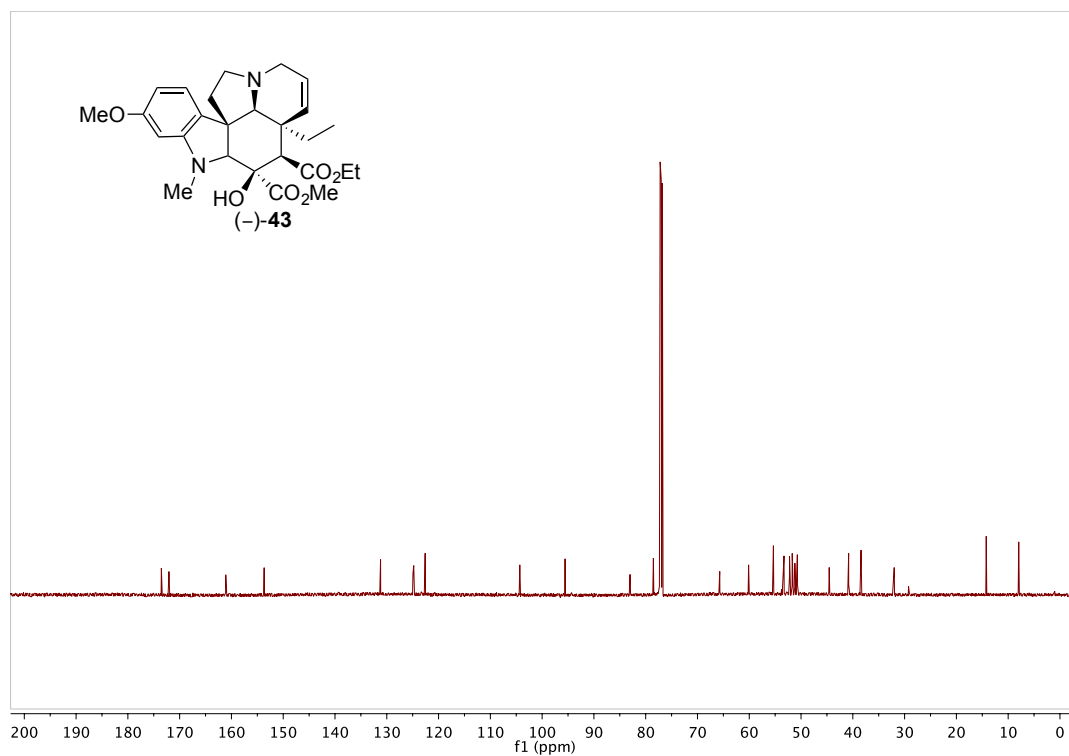

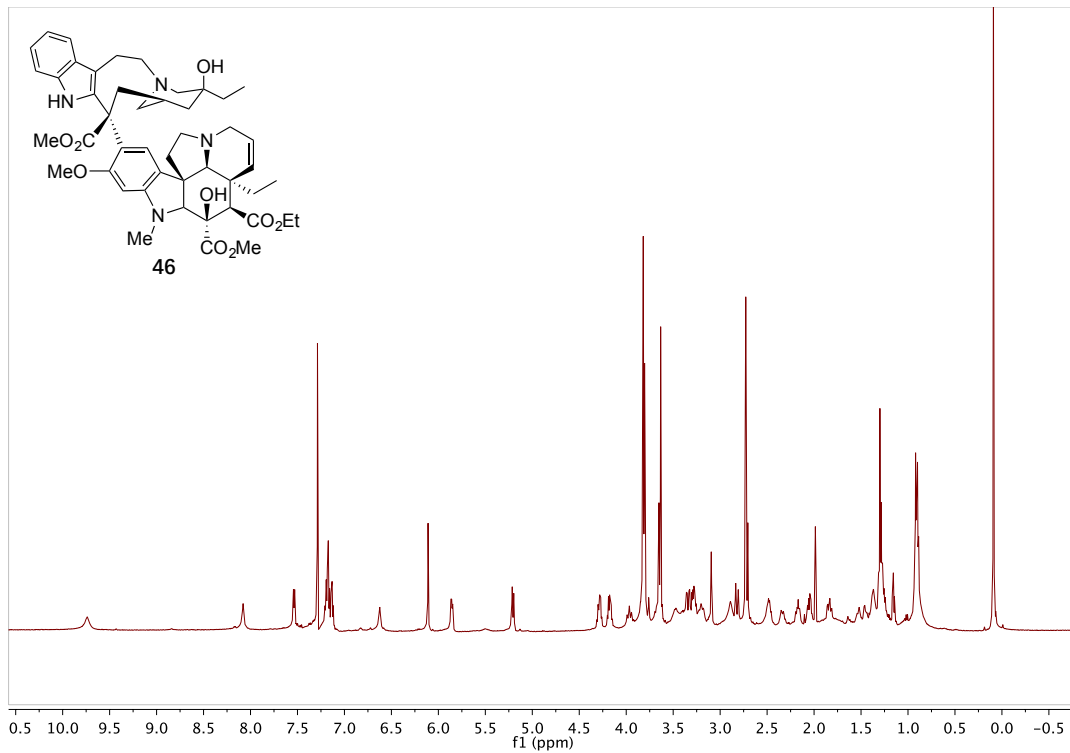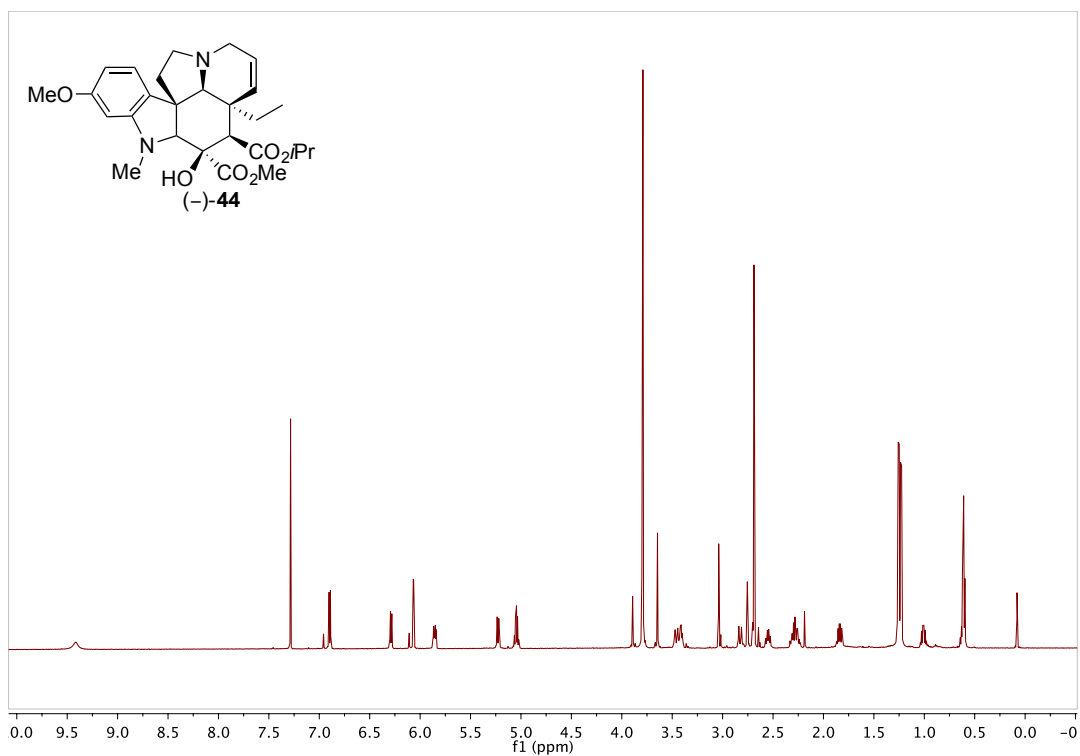

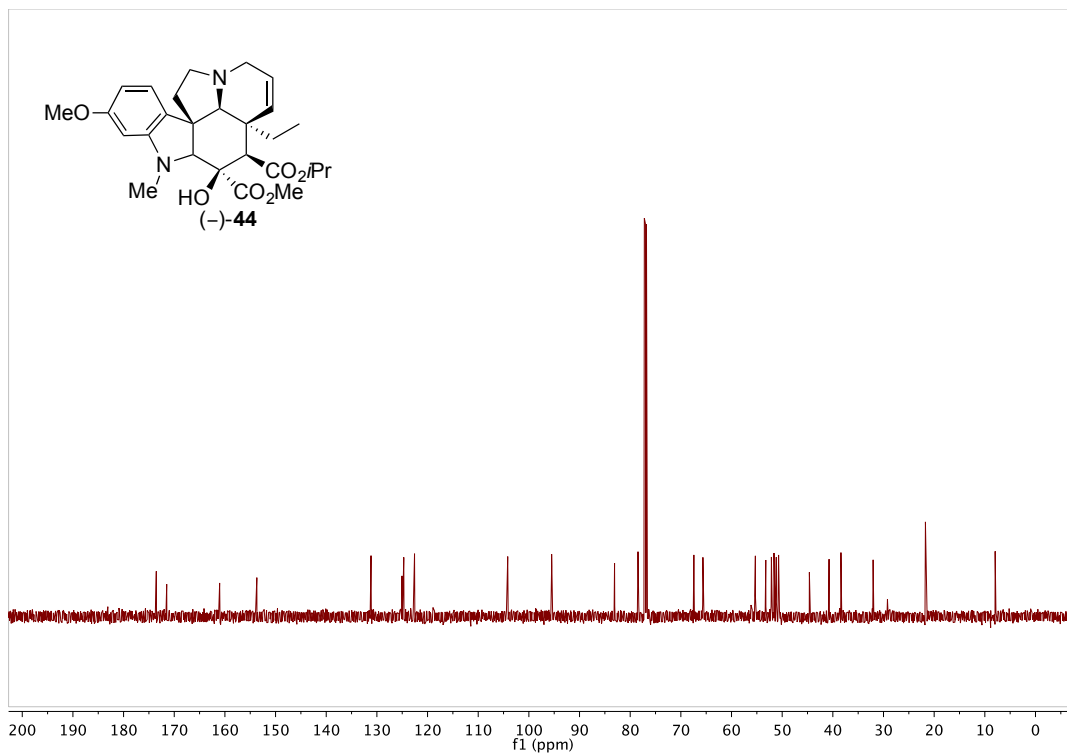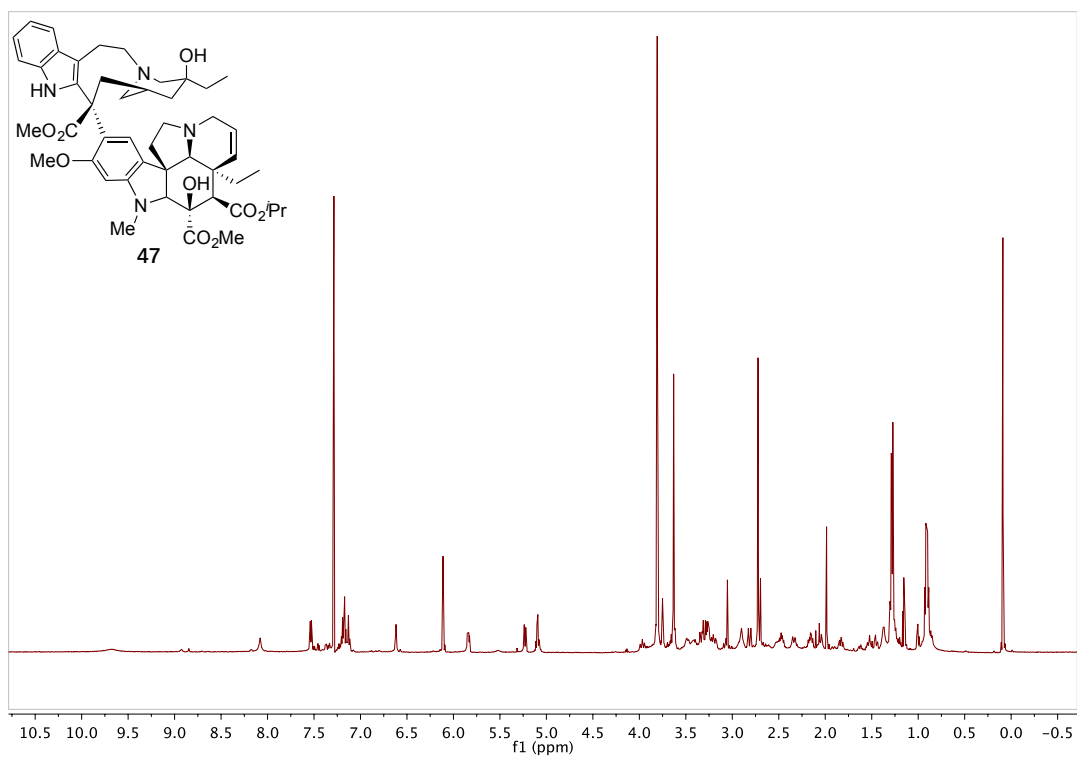

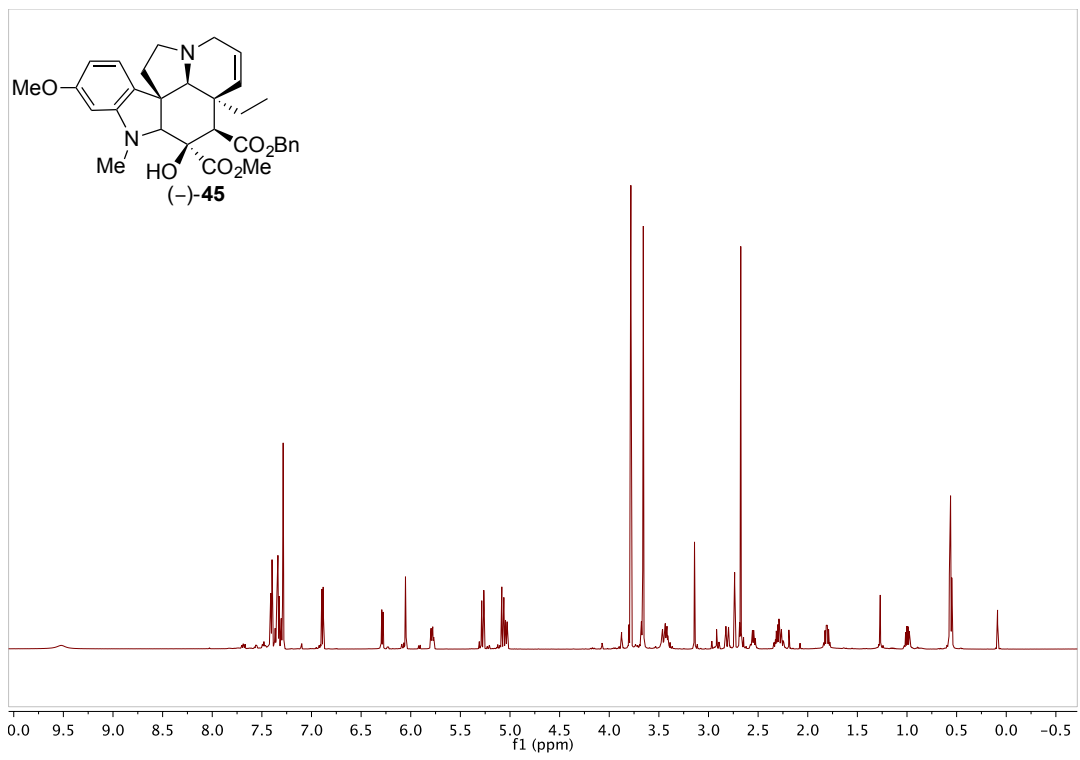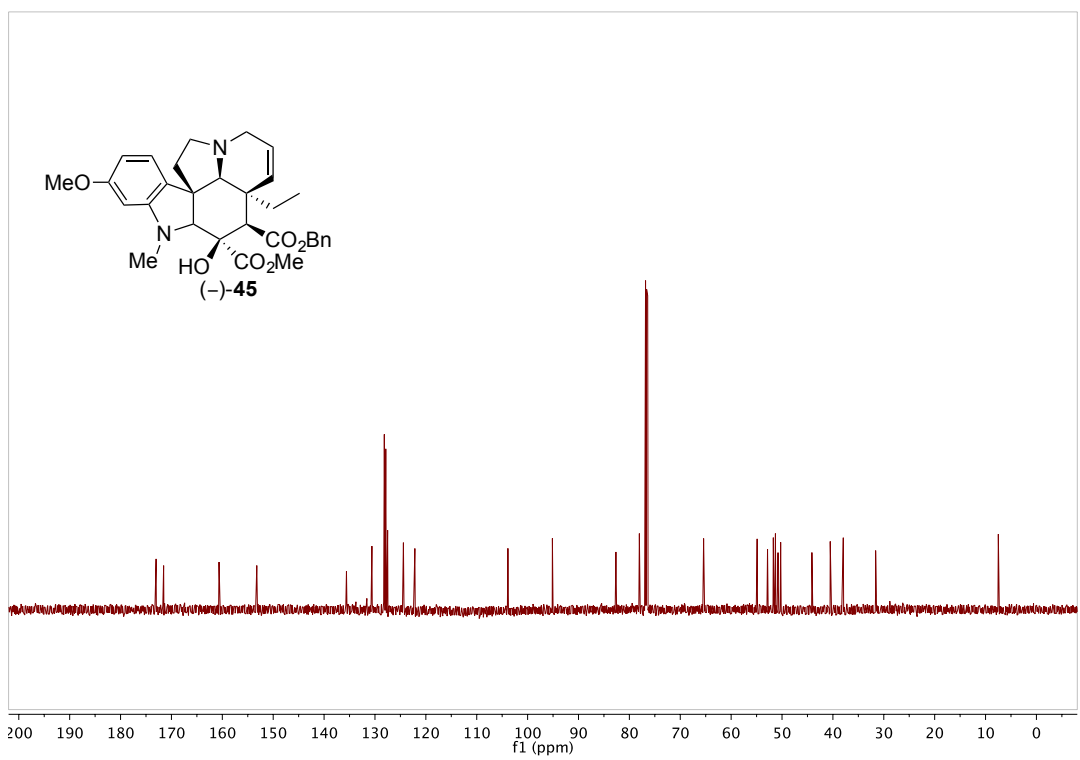



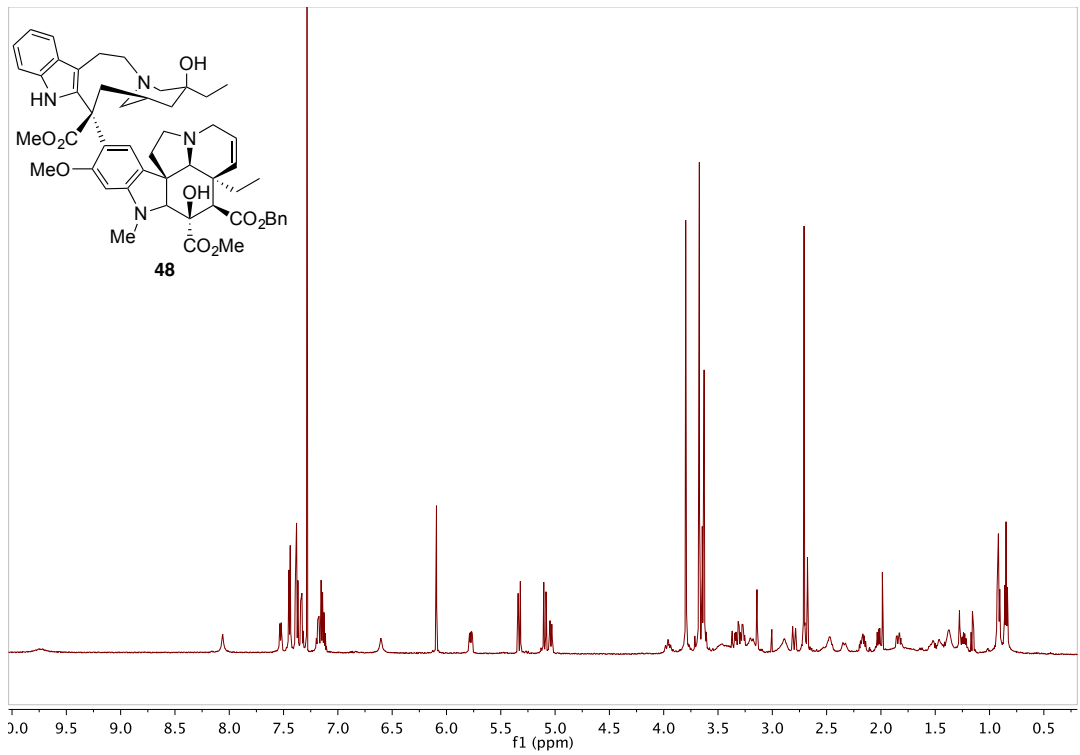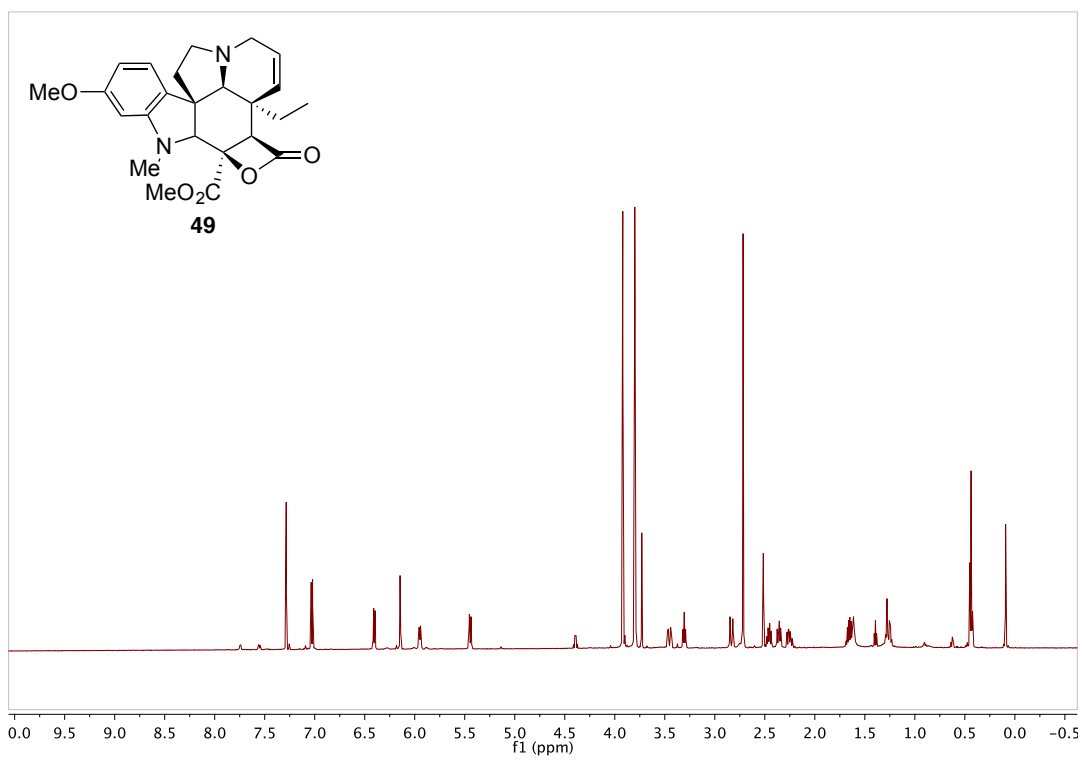

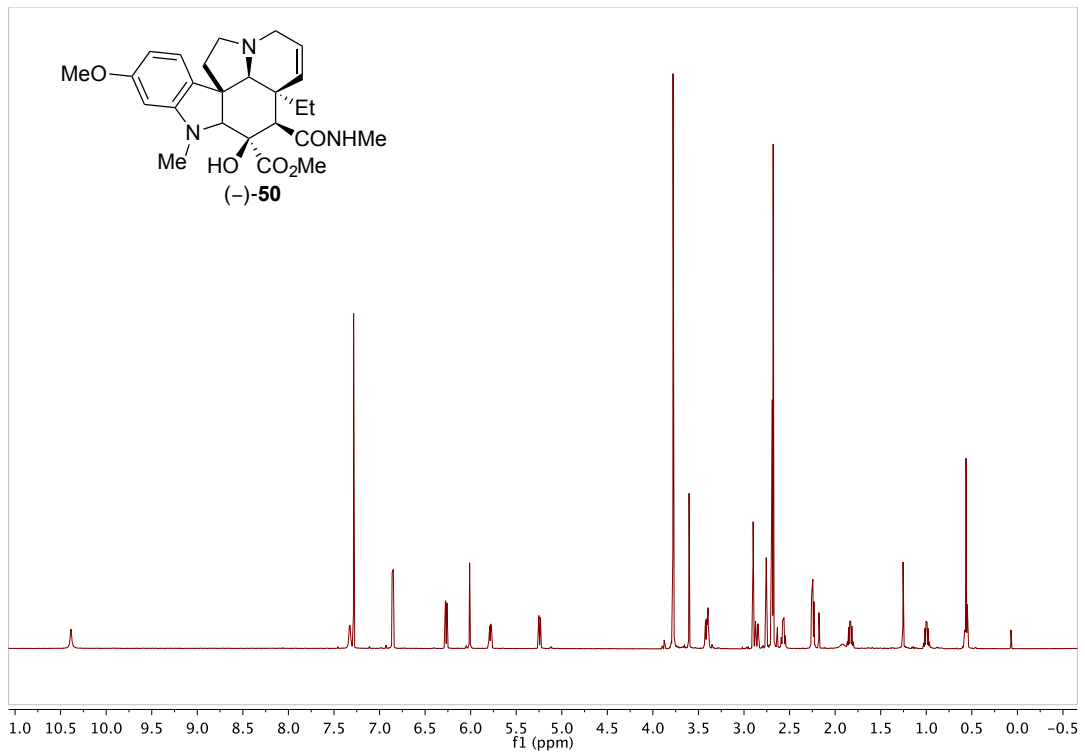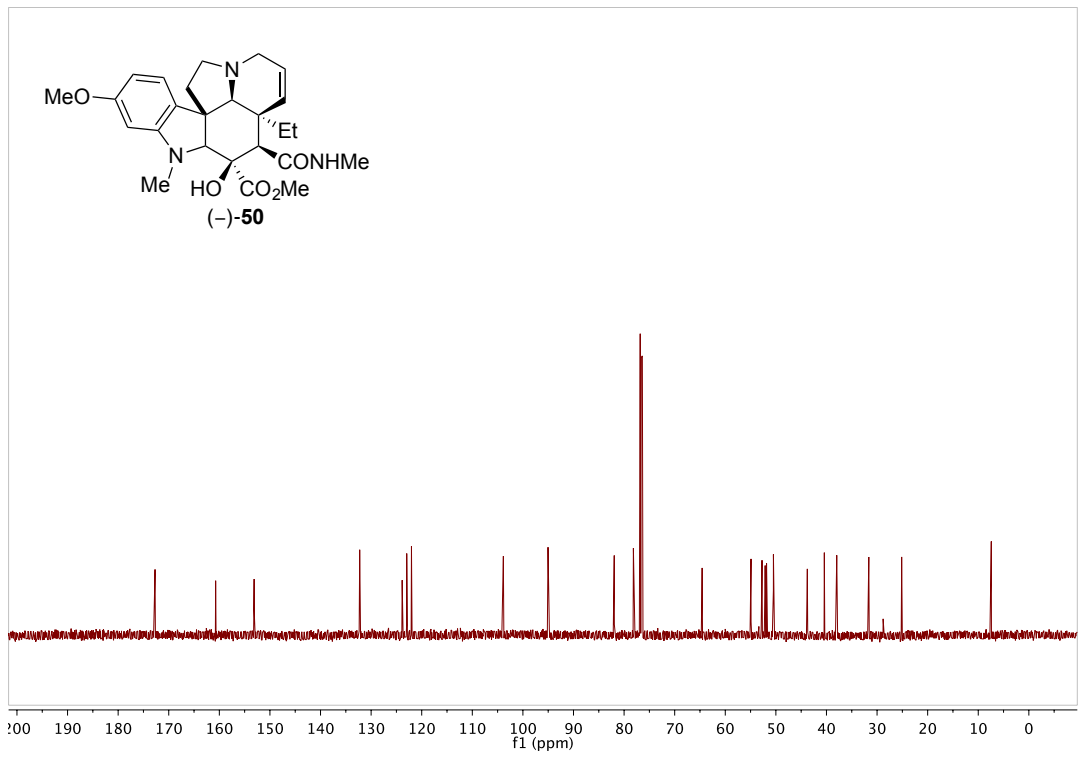

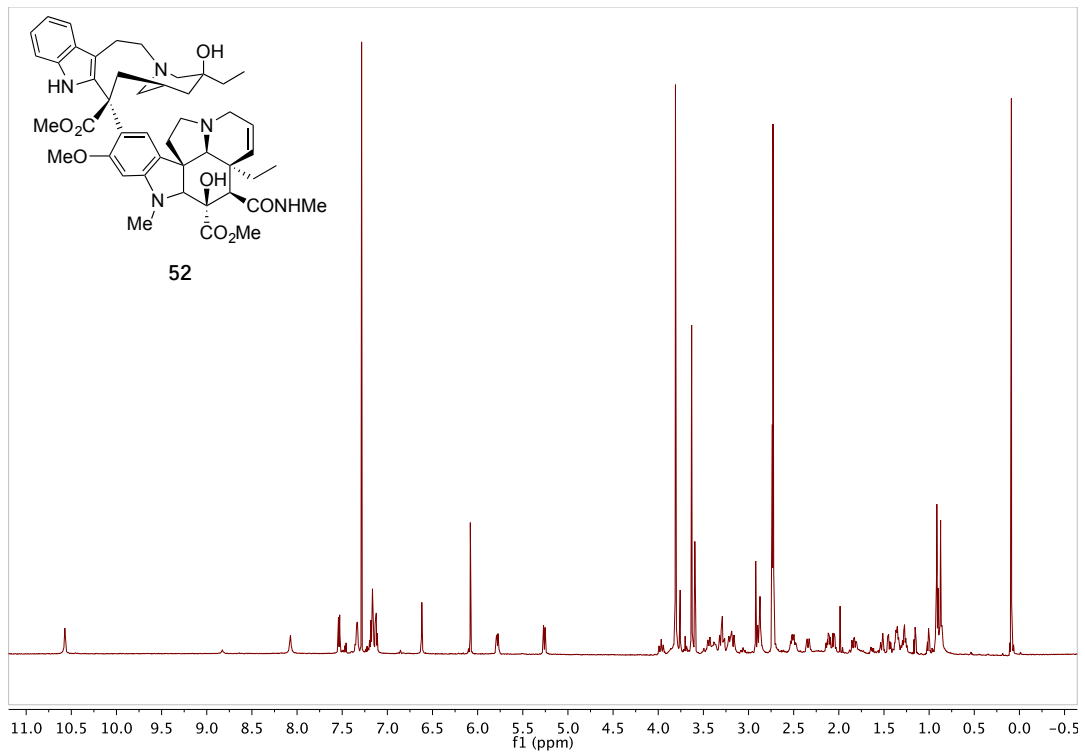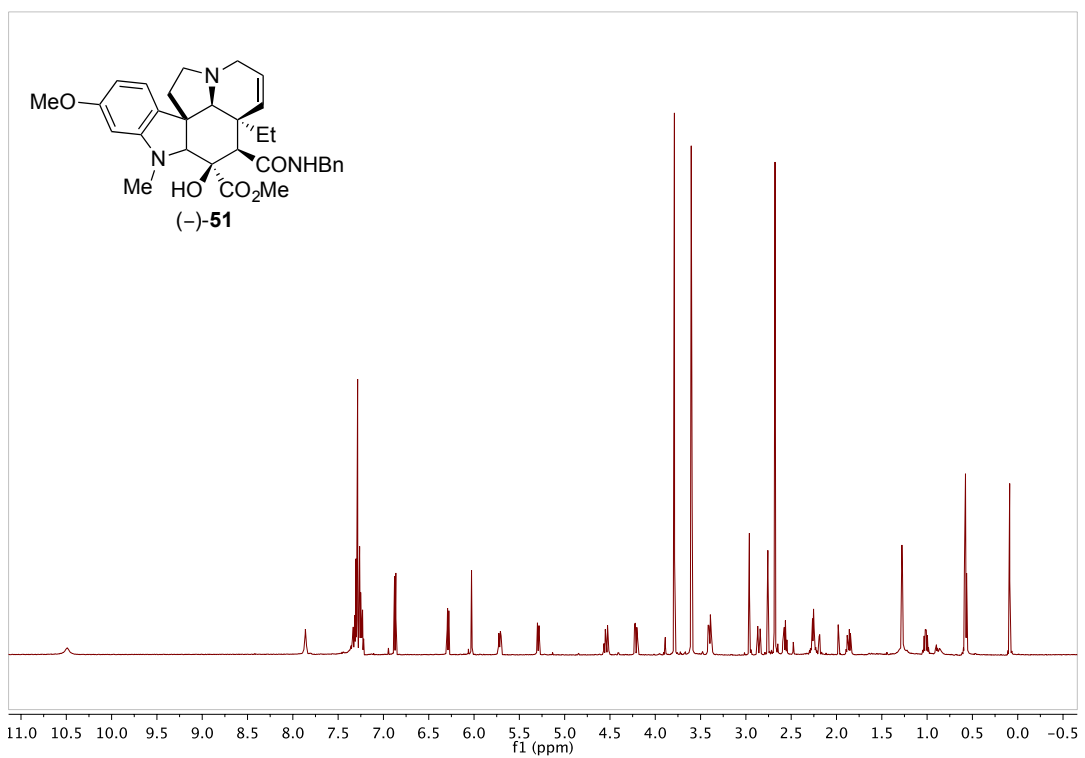

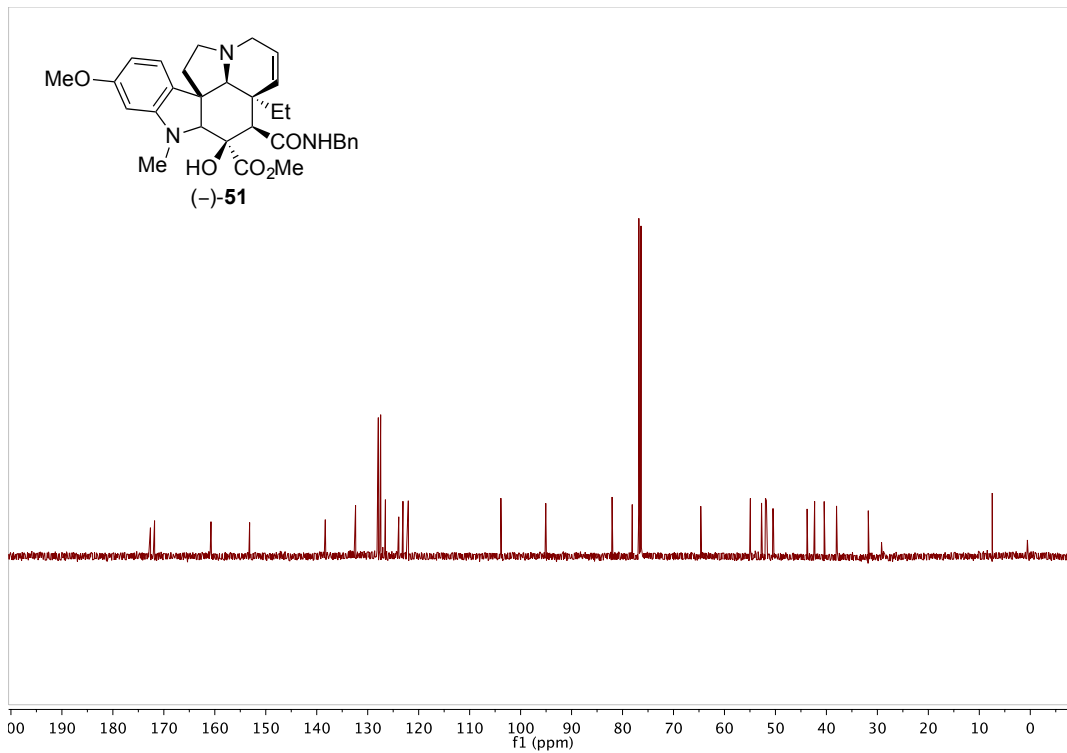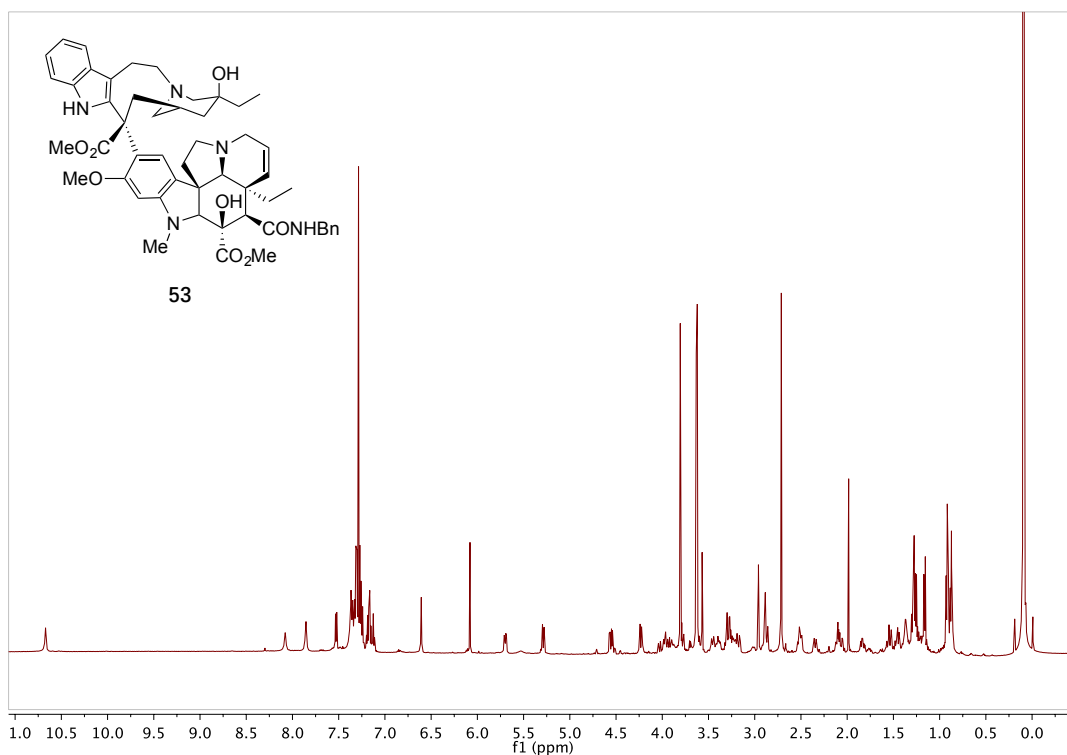

Supplement: SC-008-C6SC04146A-s001.pdf [file SC-008-C6SC04146A-s001.pdf]
